# Supplementary material for: Remodeling of the Streptococcus agalactiae Transcriptome in Response to Growth Temperature
Source: PubMed Central journal article supplement (PMC2464734; doi:10.1371/journal.pone.0002785), 2008-07-30
Supplement: pone.0002785.s001.pdf [file pone.0002785.s001.pdf]

| NCBI ID | COG(s)        | Locus tag | Locus  | Functional category      | Subcategory                                                                     | Putative function                                                                         | ratio 30/40ML | p value ML | ratio 30/40LL | p value LL | ratio 30/40S | p value S |
|---------|---------------|-----------|--------|--------------------------|---------------------------------------------------------------------------------|-------------------------------------------------------------------------------------------|---------------|------------|---------------|------------|--------------|-----------|
| 1029804 | COG0593L      | gbs0001   | dnaA   | Cellular processes       | DNA replication, recombination and repair                                       | Chromosomal replication initiator protein dnaA                                            | 1.088         | 0.014      | 0.784         | 0.001      | 3.120        | 0.000     |
| 1029808 | COG0592L      | gbs0002   | dnaN   | Cellular processes       | DNA replication, recombination and repair                                       | DNA polymerase III, beta chain (EC 2.7.7.7)                                               | 1.127         | 0.002      | 0.771         | 0.008      | 2.904        | 0.001     |
| 1029799 | COG1597IR     | gbs0003   | -      | Hypothetical             | -                                                                               | Hypothetical protein                                                                      | 0.762         | 0.001      | 0.785         | 0.008      | 2.079        | 0.010     |
| 1029797 | -             | gbs0004   | -      | Hypothetical             | -                                                                               | Hypothetical cytosolic protein                                                            | 0.743         | 0.004      | 0.858         | 0.113      | 1.766        | 0.028     |
| 1029795 | -             | gbs0005   | -      | Hypothetical             | -                                                                               | Hypothetical protein                                                                      | 0.820         | 0.026      | 0.976         | 0.703      | 3.636        | 0.000     |
| 1030675 | COG0012J      | gbs0006   | -      | Cellular processes       | Translation, ribosomal structure and biogenesis                                 | GTP-binding protein, probable translation factor                                          | 0.827         | 0.008      | 1.257         | 0.012      | 1.858        | 0.017     |
| 1030987 | -             | gbs0007   | pth    | Cellular processes       | Translation, ribosomal structure and biogenesis                                 | Peptidyl-IRNA hydrolase (EC 3.1.1.29)                                                     | 0.467         | 0.000      | 1.669         | 0.016      | 0.544        | 0.072     |
| 1029794 | COG1197LK     | gbs0008   | trcF   | Cellular processes       | DNA replication, recombination and repair                                       | Transcription-repair coupling factor                                                      | 0.350         | 0.006      | 1.722         | 0.005      | 1.015        | 0.977     |
| 1029790 | COG1188J      | gbs0009   | -      | Cellular processes       | Translation, ribosomal structure and biogenesis                                 | Heat shock protein 15                                                                     | 1.128         | 0.120      | 1.000         | 0.993      | 1.610        | 0.048     |
| 1029787 | COG2919D      | gbs0010   | divIC  | Cellular processes       | Cell division                                                                   | Cell division protein DIVIC                                                               | 0.910         | 0.055      | 0.959         | 0.265      | 1.078        | 0.277     |
| 1030424 | -             | gbs0011   | -      | Hypothetical             | -                                                                               | Hypothetical protein                                                                      | 1.007         | 0.795      | 0.961         | 0.292      | 1.560        | 0.065     |
| 1029782 | COG2367V      | gbs0012   | -      | Cellular processes       | Toxin production and resistance                                                 | Beta-lactamase (EC 3.5.2.6)                                                               | 0.787         | 0.001      | 0.964         | 0.255      | 1.484        | 0.039     |
| 1029802 | COG0037D      | gbs0013   | tlhS   | Cellular processes       | Translation, ribosomal structure and biogenesis                                 | IRNA(Ile)-lysinase synthesis TlhS                                                         | 0.913         | 0.053      | 1.031         | 0.514      | 1.542        | 0.075     |
| 1030991 | COG0634F      | gbs0014   | hpt    | Metabolism and transport | Purines, pyrimidines, nucleosides, and nucleotides                              | Hypoxanthine-guanine phosphoribosyltransferase (EC 2.4.2.8)                               | 1.285         | 0.023      | 1.309         | 0.012      | 2.179        | 0.021     |
| 1030977 | COG0465O      | gbs0015   | ftsH   | Cellular processes       | Posttranslational modification, protein turnover, chaperones                    | Cell division protein ftsH (EC 3.4.24.-)                                                  | 1.124         | 0.008      | 1.227         | 0.052      | 3.841        | 0.001     |
| 1031481 | COG3883S, COG | gbs0016   | pcsB   | Cell Envelope            | Other                                                                           | Glucan-binding protein B                                                                  | 0.804         | 0.008      | 0.937         | 0.096      | 1.352        | 0.073     |
| 1031120 | COG0462FE     | gbs0017   | prsA.2 | Metabolism and transport | Purines, pyrimidines, nucleosides, and nucleotides                              | Ribose-phosphate pyrophosphokinase (EC 2.7.6.1)                                           | 0.814         | 0.037      | 0.879         | 0.089      | 0.920        | 0.631     |
| 1031047 | COG0436E      | gbs0018   | aspB   | Metabolism and transport | Amino acids, peptides, amino sugars and amines                                  | Aromatic amino acid aminotransferase (EC 2.6.1.57) Acetylaminopimelate aminotransferase   | 1.837         | 0.000      | 1.143         | 0.078      | 1.052        | 0.728     |
| 1030999 | COG1381L      | gbs0019   | recO   | Cellular processes       | DNA replication, recombination and repair                                       | DNA repair protein recO                                                                   | 1.703         | 0.002      | 1.228         | 0.023      | 1.420        | 0.026     |
| 1031000 | -             | gbs0020   | -      | Cellular processes       | Posttranslational modification, protein turnover, chaperones                    | CAAX amino terminal protease family                                                       | 0.698         | 0.014      | 0.794         | 0.254      | 0.351        | 0.332     |
| 1031476 | COG0416I      | gbs0021   | plsX   | Metabolism and transport | Fatty acid and phospholipids                                                    | Fatty acid phospholipid synthesis protein plsX                                            | 1.461         | 0.004      | 1.111         | 0.105      | 1.797        | 0.024     |
| 1031477 | COG0236IQ     | gbs0022   | acpP.2 | Metabolism and transport | Fatty acid and phospholipids                                                    | Acyl carrier protein                                                                      | 1.721         | 0.002      | 1.108         | 0.175      | 2.257        | 0.006     |
| 1031217 | -             | gbs0023   | purC   | Metabolism and transport | Purines, pyrimidines, nucleosides, and nucleotides                              | Phosphoribosylaminoimidazole-succinocarboxamide synthase (EC 6.3.2.6)                     | 0.839         | 0.079      | 0.042         | 0.000      | 1.880        | 0.431     |
| 1030849 | COG0046F, COG | gbs0024   | purL   | Metabolism and transport | Purines, pyrimidines, nucleosides, and nucleotides                              | Phosphoribosylformylglycinamide synthase (EC 6.3.5.3)                                     | 0.677         | 0.026      | 0.051         | 0.003      | 0.588        | 0.461     |
| 1031315 | COG0034F      | gbs0025   | purF   | Metabolism and transport | Purines, pyrimidines, nucleosides, and nucleotides                              | Amidophosphoribosyltransferase (EC 2.4.2.14)                                              | 0.592         | 0.014      | 0.070         | 0.000      | 1.190        | 0.647     |
| 1029830 | COG0150F      | gbs0026   | purM   | Metabolism and transport | Purines, pyrimidines, nucleosides, and nucleotides                              | Phosphoribosylformylglycinamide cyclo-lyase (EC 6.3.3.1)                                  | 0.757         | 0.002      | 0.094         | 0.001      | 0.511        | 0.143     |
| 1030771 | -             | gbs0027   | purN   | Metabolism and transport | Purines, pyrimidines, nucleosides, and nucleotides                              | Phosphoribosylglycinamide formyltransferase (EC 2.1.2.2)                                  | 0.964         | 0.699      | 0.051         | 0.004      | 0.810        | 0.208     |
| 1031482 | -             | gbs0028   | -      | Hypothetical             | -                                                                               | Zwittermucin A resistance protein zmaR                                                    | 0.735         | 0.022      | 1.011         | 0.000      | 1.340        | 0.094     |
| 1031413 | -             | gbs0029   | purH   | Metabolism and transport | Purines, pyrimidines, nucleosides, and nucleotides                              | Phosphoribosylaminoimidazolecarboxamide formyltransferase (EC 2.1.2.3) IMP cyclohydrolase | 0.763         | 0.059      | 0.099         | 0.001      | 1.028        | 0.852     |
| 1031034 | COG0739M      | gbs0030   | -      | Cellular processes       | Posttranslational modification, protein turnover, chaperones                    | Peptidoglycan-specific endopeptidase, M23 family                                          | 2.541         | 0.001      | 2.010         | 0.035      | 1.211        | 0.614     |
| 1031483 | -             | gbs0031   | sip    | Hypothetical             | -                                                                               | Surface antigen                                                                           | 1.083         | 0.105      | 0.981         | 0.696      | 0.773        | 0.142     |
| 1029831 | COG3010G      | gbs0032   | -      | Metabolism and transport | Carbohydrates, organic alcohols, and acids                                      | N-acetylmannosamine-6-phosphate 2-epimerase (EC 5.1.3.9)                                  | 0.772         | 0.118      | 1.086         | 0.240      | 3.363        | 0.000     |
| 1030981 | COG1653G      | gbs0033   | -      | Metabolism and transport | Carbohydrates, organic alcohols, and acids                                      | N-acetylneuraminate-binding protein                                                       | 1.004         | 0.968      | 0.712         | 0.184      | 2.678        | 0.000     |
| 1029879 | COG1175G      | gbs0034   | -      | Metabolism and transport | Carbohydrates, organic alcohols, and acids                                      | N-acetylneuraminate transport system permease protein                                     | 0.717         | 0.020      | 0.462         | 0.103      | 3.774        | 0.001     |
| 1031470 | COG0395G      | gbs0035   | -      | Metabolism and transport | Carbohydrates, organic alcohols, and acids                                      | N-acetylneuraminate transport system permease protein                                     | 0.733         | 0.020      | 0.566         | 0.303      | 2.483        | 0.009     |
| 1031485 | -             | gbs0036   | -      | Hypothetical             | -                                                                               | Hypothetical cytosolic protein                                                            | 0.695         | 0.075      | 0.572         | 0.172      | 2.686        | 0.000     |
| 1031486 | -             | gbs0037   | -      | Hypothetical             | -                                                                               | Hypothetical membrane spanning protein                                                    | 0.603         | 0.256      | 1.138         | 0.669      | 2.340        | 0.021     |
| 1030355 | COG0329EM     | gbs0038   | nanH   | Cell Envelope            | Biosynthesis and degradation of surface polysaccharides and lipopolysaccharides | N-acetylneuraminate lyase (EC 4.1.3.3)                                                    | 0.519         | 0.028      | 0.818         | 0.193      | 2.306        | 0.007     |
| 1030984 | COG1940KG     | gbs0039   | -      | Cellular processes       | Signal transduction                                                             | N-acetylmannosamine kinase (EC 2.7.1.60) Transcriptional regulator                        | 0.860         | 0.317      | 0.855         | 0.318      | 2.127        | 0.011     |
| 1031495 | COG3458Q      | gbs0040   | -      | Metabolism and transport | Secondary metabolites                                                           | Cephalosporin-C deacetylase (EC 3.1.1.41)                                                 | 0.786         | 0.097      | 0.767         | 0.348      | 2.109        | 0.000     |
| 1030478 | COG1737K      | gbs0041   | -      | Cellular processes       | Transcription                                                                   | Transcriptional regulator, RpiR family                                                    | 1.077         | 0.297      | 1.088         | 0.145      | 1.912        | 0.034     |
| 1031720 | COG0151F      | gbs0042   | purD   | Metabolism and transport | Purines, pyrimidines, nucleosides, and nucleotides                              | Phosphoribosylamine-glycine lyase (EC 6.3.4.13)                                           | 0.949         | 0.474      | 0.181         | 0.009      | 1.130        | 0.520     |
| 1030779 | COG0041F      | gbs0043   | purE   | Metabolism and transport | Purines, pyrimidines, nucleosides, and nucleotides                              | Phosphoribosylaminoimidazole carboxylase carboxyltransferase subunit (EC 4.1.1.21)        | 1.251         | 0.282      | 0.111         | 0.002      | 1.170        | 0.512     |
| 1030983 | COG0026F      | gbs0044   | purK   | Metabolism and transport | Purines, pyrimidines, nucleosides, and nucleotides                              | Phosphoribosylaminoimidazole carboxylase NCAIR mutase subunit (EC 4.1.1.21)               | 0.906         | 0.554      | 0.161         | 0.004      | 1.368        | 0.267     |
| 1030998 | -             | gbs0045   | -      | Hypothetical             | -                                                                               | Hypothetical protein                                                                      | 0.786         | 0.001      | 0.403         | 0.002      | 1.320        | 0.074     |
| 1030996 | -             | gbs0046   | -      | Hypothetical             | -                                                                               | Hypothetical protein                                                                      | 0.885         | 0.104      | 0.574         | 0.000      | 1.197        | 0.126     |
| 1030994 | COG0015F      | gbs0047   | purB   | Metabolism and transport | Purines, pyrimidines, nucleosides, and nucleotides                              | Adenylosuccinate lyase (EC 4.3.2.2)                                                       | 1.080         | 0.257      | 0.508         | 0.011      | 1.031        | 0.802     |
| 1030979 | -             | gbs0048   | -      | Cellular processes       | Transcription                                                                   | Transcriptional regulator                                                                 | 0.379         | 0.000      | 0.256         | 0.002      | 0.117        | 0.001     |
| 1030989 | COG2255L      | gbs0049   | ruvB   | Cellular processes       | DNA replication, recombination and repair                                       | Holliday junction DNA helicase ruvB                                                       | 1.004         | 0.981      | 0.785         | 0.102      | 0.407        | 0.100     |
| 1030982 | COG0394T      | gbs0050   | -      | Cellular processes       | Signal transduction                                                             | Protein tyrosine phosphatase (EC 3.1.3.48)                                                | 1.704         | 0.001      | 1.171         | 0.088      | 2.513        | 0.001     |
| 1030978 | COG4642S      | gbs0051   | -      | Hypothetical             | -                                                                               | Hypothetical membrane associated protein                                                  | 1.436         | 0.003      | 1.215         | 0.008      | 3.684        | 0.000     |
| 1030985 | COG1835I      | gbs0052   | -      | Metabolism and transport | Fatty acid and phospholipids                                                    | Acyltransferase family                                                                    | 1.161         | 0.062      | 1.220         | 0.063      | 2.367        | 0.001     |
| 1030824 | COG1012C, COG | gbs0053   | adh2   | Metabolism and transport | Energy production and conversion                                                | Alcohol dehydrogenase (EC 1.1.1.1) Acetaldehyde dehydrogenase [acetylating] (EC 1.2.1.10) | 1.412         | 0.046      | 0.292         | 0.001      | 0.557        | 0.025     |
| 1030992 | COG1064R      | gbs0054   | adhA   | Metabolism and transport | Energy production and conversion                                                | Alcohol dehydrogenase (EC 1.1.1.1)                                                        | 0.867         | 0.090      | 0.337         | 0.014      | 0.422        | 0.011     |
| 1031381 | COG0498E      | gbs0055   | thrC   | Metabolism and transport | Amino acids, peptides, amino sugars and amines                                  | Threonine synthase (EC 4.2.3.1)                                                           | 1.068         | 0.207      | 0.967         | 0.581      | 0.805        | 0.043     |
| 1030757 | COG0534V      | gbs0056   | -      | Cellular processes       | Toxin production and resistance                                                 | Na+ driven multidrug efflux pump                                                          | 1.029         | 0.370      | 0.912         | 0.235      | 0.744        | 0.009     |
| 1030755 | COG0051J      | gbs0057   | rpsJ   | Cellular processes       | Translation, ribosomal structure and biogenesis                                 | SSU ribosomal protein S10P                                                                | 0.790         | 0.005      | 1.157         | 0.005      | 3.047        | 0.006     |
| 1030743 | -             | gbs0058   | rplC   | Cellular processes       | Translation, ribosomal structure and biogenesis                                 | LSU ribosomal protein L3P                                                                 | 0.781         | 0.005      | 1.199         | 0.041      | 2.913        | 0.000     |
| 1031368 | -             | gbs0059   | rplD   | Cellular processes       | Translation, ribosomal structure and biogenesis                                 | LSU ribosomal protein L1E (= L4P)                                                         | 0.841         | 0.000      | 1.213         | 0.006      | 3.359        | 0.000     |
| 1030756 | COG0089J      | gbs0060   | rplW   | Cellular processes       | Translation, ribosomal structure and biogenesis                                 | LSU ribosomal protein L23P                                                                | 0.825         | 0.002      | 1.144         | 0.025      | 3.515        | 0.000     |
| 1030731 | COG0090J      | gbs0061   | rplB   | Cellular processes       | Translation, ribosomal structure and biogenesis                                 | LSU ribosomal protein L2P                                                                 | 0.763         | 0.002      | 1.219         | 0.034      | 3.069        | 0.000     |
| 1030738 | COG0185J      | gbs0062   | rpsS   | Cellular processes       | Translation, ribosomal structure and biogenesis                                 | SSU ribosomal protein S19P                                                                | 0.800         | 0.012      | 1.259         | 0.023      | 2.168        | 0.009     |
| 1030594 | -             | gbs0063   | rplV   | Cellular processes       | Translation, ribosomal structure and biogenesis                                 | LSU ribosomal protein L22P                                                                | 0.766         | 0.002      | 1.176         | 0.003      | 2.159        | 0.003     |
| 1031362 | COG0092J      | gbs0064   | rpsC   | Cellular processes       | Translation, ribosomal structure and biogenesis                                 | SSU ribosomal protein S3P                                                                 | 0.695         | 0.002      | 1.138         | 0.033      | 2.488        | 0.002     |
| 1031364 | COG0197J      | gbs0065   | rplP   | Cellular processes       | Translation, ribosomal structure and biogenesis                                 | LSU ribosomal protein L16P                                                                | 0.763         | 0.001      | 1.174         | 0.027      | 2.374        | 0.013     |
| 1031365 | -             | gbs0066   | rpmC   | Cellular processes       | Translation, ribosomal structure and biogenesis                                 | LSU ribosomal protein L29P                                                                | 0.777         | 0.000      | 1.184         | 0.005      | 2.860        | 0.001     |
| 1031359 | COG0186J      | gbs0067   | rpsQ   | Cellular processes       | Translation, ribosomal structure and biogenesis                                 | SSU ribosomal protein S17P                                                                | 0.787         | 0.001      | 1.208         | 0.013      | 2.171        | 0.001     |
| 1031447 | -             | gbs0068   | rplN   | Cellular processes       | Translation, ribosomal structure and biogenesis                                 | LSU ribosomal protein L14P                                                                | 0.765         | 0.003      | 1.120         | 0.122      | 2.402        | 0.001     |
| 1030496 | COG0198J      | gbs0069   | rplX   | Cellular processes       | Translation, ribosomal structure and biogenesis                                 | LSU ribosomal protein L24P                                                                | 0.804         | 0.006      | 1.160         | 0.045      | 2.237        | 0.001     |
| 1031361 | COG0094J      | gbs0070   | rplE   | Cellular processes       | Translation, ribosomal structure and biogenesis                                 | LSU ribosomal protein L5P                                                                 | 0.810         | 0.002      | 1.295         | 0.000      | 2.036        | 0.069     |
| 1031357 | COG0199J      | gbs0071   | rpsN   | Cellular processes       | Translation, ribosomal structure and biogenesis                                 | SSU ribosomal protein S14P                                                                | 0.768         | 0.011      | 1.166         | 0.014      | 2.923        | 0.002     |
| 1030668 | -             | gbs0072   | rpsH   | Cellular processes       | Translation, ribosomal structure and biogenesis                                 | SSU ribosomal protein S8P                                                                 | 0.834         | 0.005      | 1.210         | 0.017      | 2.384        | 0.001     |
| 1031356 | COG0097J      | gbs0073   | rplF   | Cellular processes       | Translation, ribosomal structure and biogenesis                                 | LSU ribosomal protein L6P                                                                 | 0.789         | 0.001      | 1.149         | 0.012      | 3.111        | 0.002     |
| 1030664 | COG0256J      | gbs0074   | rplR   | Cellular processes       | Translation, ribosomal structure and biogenesis                                 | LSU ribosomal protein L18P                                                                | 0.852         | 0.019      | 1.287         | 0.008      | 2.389        | 0.004     |
| 1030663 | COG0098J      | gbs0075   | rpsE   | Cellular processes       | Translation, ribosomal structure and biogenesis                                 | SSU ribosomal protein S5P                                                                 | 0.850         | 0.007      | 1.145         | 0.040      | 2.890        | 0.000     |
| 1031353 | COG1841J      | gbs0076   | rpmD   | Cellular processes       | Translation, ribosomal structure and biogenesis                                 | LSU ribosomal protein L30P                                                                | 0.772         | 0.000      | 1.149         | 0.008      | 3.351        | 0.000     |
| 1031349 | COG0200J      | gbs0077   | rplO   | Cellular processes       | Translation, ribosomal structure and biogenesis                                 | LSU ribosomal protein L15P                                                                | 0.864         | 0.017      | 1.160         | 0.073      | 3.535        | 0.        |

|         |               |         |       |                                 |                                                                    |                                                                                          |       |       |       |       |        |       |
|---------|---------------|---------|-------|---------------------------------|--------------------------------------------------------------------|------------------------------------------------------------------------------------------|-------|-------|-------|-------|--------|-------|
| 1030544 | -             | gbs0092 |       | Cell Envelope                   | Biosynthesis and degradation of murein sacculus and peptidoglycan  | D-alanyl-D-alanine metallocoarboxypeptidase (EC 3.4.17.14)                               | 1.333 | 0.027 | 1.071 | 0.142 | 1.040  | 0.806 |
| 1031431 | COG1705NU     | gbs0093 |       | Cell Envelope                   | Biosynthesis and degradation of murein sacculus and peptidoglycan  | N-acetylmuramoyl-L-alanine amidase (EC 3.5.1.28)                                         | 0.985 | 0.258 | 1.059 | 0.178 | 0.987  | 0.744 |
| 1030538 | COG1420K      | gbs0094 | hrcA  | Cellular processes              | Transcription                                                      | Heat-inducible transcription repressor hrcA                                              | 2.246 | 0.000 | 2.031 | 0.003 | 0.388  | 0.032 |
| 1031176 | COG0576O      | gbs0095 | grpE  | Cellular processes              | Posttranslational modification, protein turnover, chaperones       | GrpE protein                                                                             | 2.778 | 0.000 | 2.332 | 0.020 | 0.288  | 0.031 |
| 1030530 | COG0443O      | gbs0096 | dnaK  | Cellular processes              | Posttranslational modification, protein turnover, chaperones       | Chaperone protein dnaK                                                                   | 1.425 | 0.019 | 1.636 | 0.027 | 0.452  | 0.014 |
| 1031312 | COG0484O      | gbs0097 | dnaJ  | Cellular processes              | Posttranslational modification, protein turnover, chaperones       | Chaperone protein dnaJ                                                                   | 1.775 | 0.039 | 1.597 | 0.078 | 0.799  | 0.254 |
| 1031314 | COG1167KE     | gbs0098 |       | Cellular processes              | Transcription                                                      | Transcriptional regulator, GntR family AMINOTRANSFERASE CLASS-I (EC 2.6.1.-)             | 1.138 | 0.435 | 1.131 | 0.156 | 1.165  | 0.146 |
| 1031307 | COG1011J      | gbs0099 | trua  | Cellular processes              | Translation, ribosomal structure and biogenesis                    | IRNA pseudouridine synthase A (EC 4.2.1.70)                                              | 0.647 | 0.006 | 0.601 | 0.003 | 0.700  | 0.171 |
| 1030485 | COG0351H      | gbs0100 | thiD  | Metabolism and transport        | Cofactors, prosthetic groups, and carriers                         | Phosphomethylpyrimidine kinase (EC 2.7.4.7) Hydroxymethylpyrimidine kinase (EC 2.7.1.49) | 0.865 | 0.247 | 0.790 | 0.059 | 0.407  | 0.012 |
| 1030521 | COG4720S      | gbs0101 |       | Hypothetical                    | Hypothetical                                                       | Hypothetical membrane spanning protein                                                   | 0.767 | 0.076 | 0.605 | 0.041 | 0.511  | 0.043 |
| 1031311 | -             | gbs0102 |       | Hypothetical                    | Hypothetical                                                       | Hypothetical protein                                                                     | 0.788 | 0.095 | 0.625 | 0.016 | 0.380  | 0.002 |
| 1031306 | COG0668M      | gbs0103 |       | General function predicted only | Mechanosensitive ion channel                                       | Mechanosensitive ion channel                                                             | 1.201 | 0.265 | 1.004 | 0.977 | 0.859  | 0.556 |
| 1031436 | COG0544O      | gbs0104 | tiq   | Cellular processes              | Posttranslational modification, protein turnover, chaperones       | Trigger factor, ppiase (EC 5.2.1.8)                                                      | 0.844 | 0.011 | 1.029 | 0.617 | 2.267  | 0.002 |
| 1031441 | COG3343K      | gbs0105 | rpoE  | Cellular processes              | Transcription                                                      | DNA-directed RNA polymerase delta chain (EC 2.7.7.6)                                     | 0.985 | 0.502 | 1.156 | 0.048 | 0.907  | 0.590 |
| 1031303 | COG0504F      | gbs0106 | pyrG  | Metabolism and transport        | Purines, pyrimidines, nucleosides, and nucleotides                 | CTP synthase (EC 6.3.4.2)                                                                | 0.936 | 0.222 | 1.277 | 0.013 | 1.805  | 0.005 |
| 1031300 | COG1073R      | gbs0107 |       | General function predicted only | Alpha beta hydrolase                                               | Alpha beta hydrolase                                                                     | 1.076 | 0.246 | 0.991 | 0.874 | 1.546  | 0.050 |
| 1030724 | -             | gbs0108 |       | Metabolism and transport        | Purines, pyrimidines, nucleosides, and nucleotides                 | Deoxyuridine 5'-triphosphate nucleotidohydrolase (EC 3.6.1.23)                           | 1.179 | 0.146 | 1.172 | 0.008 | 1.063  | 0.650 |
| 1031294 | COG1066O      | gbs0109 | radA  | Cellular processes              | DNA replication, recombination and repair                          | DNA repair protein RadA                                                                  | 1.285 | 0.002 | 1.245 | 0.004 | 3.118  | 0.000 |
| 1031293 | -             | gbs0110 |       | Metabolism and transport        | Central intermediary metabolism                                    | Carbonic anhydrase (EC 4.2.1.1)                                                          | 1.525 | 0.008 | 0.782 | 0.032 | 1.137  | 0.204 |
| 1030491 | COG1249C      | gbs0111 |       | Metabolism and transport        | Energy production and conversion                                   | Pyridine nucleotide-disulphide oxidoreductase family protein (EC 1.-.-.-)                | 1.852 | 0.000 | 1.970 | 0.001 | 0.723  | 0.053 |
| 1031263 | COG0008J      | gbs0112 | gltX  | Cellular processes              | Translation, ribosomal structure and biogenesis                    | Glutamyl-tRNA synthetase (EC 6.1.1.17)                                                   | 0.823 | 0.003 | 0.993 | 0.778 | 0.698  | 0.048 |
| 1031265 | COG1879G      | gbs0113 | rhsB  | Metabolism and transport        | Carbohydrates, organic alcohols, and acids                         | D-ribose-binding protein                                                                 | 0.528 | 0.000 | 0.880 | 0.154 | 2.324  | 0.014 |
| 1030717 | COG1172G      | gbs0114 |       | Metabolism and transport        | Carbohydrates, organic alcohols, and acids                         | Ribose transport system permease protein rhsC                                            | 0.161 | 0.000 | 0.545 | 0.012 | 1.768  | 0.035 |
| 1030709 | COG1129G      | gbs0115 |       | Metabolism and transport        | Carbohydrates, organic alcohols, and acids                         | Ribose transport ATP-binding protein rhsA                                                | 0.400 | 0.017 | 0.708 | 0.080 | 1.053  | 0.711 |
| 1030707 | COG1869G      | gbs0116 | rhsD  | Metabolism and transport        | Carbohydrates, organic alcohols, and acids                         | D-ribose mutarase (EC 5.1.3.-)                                                           | 0.423 | 0.052 | 0.778 | 0.125 | 0.626  | 0.026 |
| 1031255 | COG0524G      | gbs0117 | rhsK  | Metabolism and transport        | Carbohydrates, organic alcohols, and acids                         | Ribokinase (EC 2.7.1.15)                                                                 | 0.595 | 0.007 | 0.637 | 0.023 | 0.736  | 0.015 |
| 1031258 | COG1609K      | gbs0118 | rhsR  | Cellular processes              | Transcription                                                      | Ribose operon repressor                                                                  | 0.561 | 0.009 | 0.605 | 0.001 | 0.608  | 0.007 |
| 1030699 | COG0577V      | gbs0119 |       | Transport and binding proteins  | Unknown substrate                                                  | ABC transporter permease protein                                                         | 0.740 | 0.005 | 0.824 | 0.075 | 0.571  | 0.197 |
| 1031253 | COG1136V      | gbs0120 |       | Transport and binding proteins  | Unknown substrate                                                  | ABC transporter ATP-binding protein                                                      | 0.548 | 0.057 | 0.513 | 0.007 | 0.567  | 0.335 |
| 1031250 | COG0745TK     | gbs0121 |       | Cellular processes              | Signal transduction                                                | Two-component response regulator                                                         | 1.371 | 0.051 | 0.990 | 0.890 | 1.026  | 0.806 |
| 1031246 | COG0642T      | gbs0122 |       | Cellular processes              | Signal transduction                                                | Phosphate regulator sensor protein phoR (EC 2.7.3.-)                                     | 0.852 | 0.195 | 1.217 | 0.082 | 1.451  | 0.008 |
| 1031244 | COG0137E      | gbs0123 | argG  | Metabolism and transport        | Amino acids, peptides, aminosugars and amines                      | Argininosuccinate synthase (EC 6.3.4.5)                                                  | 1.888 | 0.002 | 1.375 | 0.095 | 1.623  | 0.008 |
| 1030698 | COG0165E      | gbs0124 | argH  | Metabolism and transport        | Amino acids, peptides, aminosugars and amines                      | Argininosuccinate lyase (EC 4.3.2.1)                                                     | 2.075 | 0.001 | 1.324 | 0.015 | 1.624  | 0.003 |
| 1030788 | COG0191G      | gbs0125 | fta   | Metabolism and transport        | Carbohydrates, organic alcohols, and acids                         | Fructose-bisphosphate aldolase (EC 4.1.2.13)                                             | 0.875 | 0.073 | 1.077 | 0.286 | 0.676  | 0.253 |
| 1030068 | COG0039C      | gbs0126 |       | Metabolism and transport        | Energy production and conversion                                   | L-2-hydroxysuccinate dehydrogenase (EC 1.1.1.-)                                          | 7.267 | 0.000 | 1.430 | 0.012 | 2.135  | 0.016 |
| 1031241 | COG0227J      | gbs0127 | rpmV  | Cellular processes              | Translation, ribosomal structure and biogenesis                    | LSU ribosomal protein L28P                                                               | 0.922 | 0.161 | 1.208 | 0.020 | 1.737  | 0.021 |
| 1030008 | -             | gbs0128 | asp   | Cellular processes              | Posttranslational modification, protein turnover, chaperones       | General stress protein, Gls24 family                                                     | 1.268 | 0.001 | 1.176 | 0.139 | 1.322  | 0.012 |
| 1030784 | COG1461R      | gbs0129 |       | General function predicted only | Dihydroxyacetone kinase family protein                             | Dihydroxyacetone kinase family protein                                                   | 1.049 | 0.164 | 1.171 | 0.015 | 1.746  | 0.023 |
| 1031234 | COG0330O      | gbs0130 |       | Cellular processes              | Posttranslational modification, protein turnover, chaperones       | Membrane protease protein family                                                         | 1.203 | 0.002 | 2.070 | 0.000 | 0.833  | 0.412 |
| 1031237 | COG1126E      | gbs0131 |       | Metabolism and transport        | Amino acids, peptides, aminosugars and amines                      | Amino acid transport ATP-binding protein                                                 | 0.800 | 0.026 | 0.839 | 0.043 | 1.980  | 0.004 |
| 1031235 | COG0765E, COG | gbs0132 |       | Metabolism and transport        | Amino acids, peptides, aminosugars and amines                      | ABC transporter amino acid-binding protein Amino acid ABC transporter permease protein   | 0.767 | 0.002 | 0.780 | 0.001 | 2.295  | 0.003 |
| 1031233 | COG4907S      | gbs0133 |       | Hypothetical                    | Hypothetical                                                       | Hypothetical membrane spanning protein                                                   | 2.193 | 0.002 | 1.298 | 0.018 | 1.710  | 0.005 |
| 1030804 | -             | gbs0134 | uppP  | Cellular processes              | Toxin production and resistance                                    | Bactracin resistance protein (Putative undecaprenol kinase) (EC 2.7.1.66)                | 1.169 | 0.044 | 1.009 | 0.752 | 2.377  | 0.002 |
| 1029996 | -             | gbs0135 | mecA  | Cellular processes              | Transcription                                                      | Negative regulator of genetic competence mecA                                            | 1.337 | 0.016 | 1.215 | 0.002 | 2.530  | 0.002 |
| 1031218 | COG0472M      | gbs0136 |       | Metabolism and transport        | Central intermediary metabolism                                    | Undecaprenyl-phosphate alpha-N-acetylglucosaminephosphotransferase (EC 2.7.8.-)          | 1.358 | 0.000 | 1.260 | 0.018 | 3.290  | 0.000 |
| 1031016 | COG0396O      | gbs0137 | sufC  | Cellular processes              | Posttranslational modification, protein turnover, chaperones       | ATP-dependent transporter sufC                                                           | 1.268 | 0.029 | 1.668 | 0.081 | 1.229  | 0.238 |
| 1031214 | -             | gbs0138 | sufD  | Metabolism and transport        | Cofactors, prosthetic groups, and carriers                         | SufD protein                                                                             | 1.187 | 0.014 | 1.160 | 0.030 | 1.333  | 0.072 |
| 1031215 | COG0520E      | gbs0139 | nifS3 | Metabolism and transport        | Amino acids, peptides, aminosugars and amines                      | Cysteine desulfurase (EC 2.8.1.7) Selenocysteine lyase (EC 4.4.1.16)                     | 1.211 | 0.072 | 1.152 | 0.016 | 1.313  | 0.031 |
| 1031211 | COG0822C      | gbs0140 | nifU  | Metabolism and transport        | Energy production and conversion                                   | IscU protein                                                                             | 1.160 | 0.136 | 1.131 | 0.318 | 1.226  | 0.125 |
| 1030191 | -             | gbs0141 | sufB  | Transport and binding proteins  | Unknown substrate                                                  | ABC transporter-associated protein sufB                                                  | 1.232 | 0.135 | 1.188 | 0.006 | 0.831  | 0.008 |
| 1031213 | COG1686M      | gbs0142 |       | Cell Envelope                   | Biosynthesis and degradation of murein sacculus and peptidoglycan  | D-alanyl-D-alanine serine-type carboxypeptidase (EC 3.4.16.4)                            | 0.777 | 0.007 | 0.479 | 0.000 | 0.806  | 0.166 |
| 1030695 | COG1686M      | gbs0143 | dacA2 | Cell Envelope                   | Biosynthesis and degradation of murein sacculus and peptidoglycan  | D-alanyl-D-alanine serine-type carboxypeptidase (EC 3.4.16.4)                            | 0.950 | 0.135 | 0.855 | 0.184 | 1.315  | 0.343 |
| 1030112 | COG4166E      | gbs0144 | oppA  | Metabolism and transport        | Amino acids, peptides, aminosugars and amines                      | Oligopeptide-binding protein oppA                                                        | 0.936 | 0.004 | 0.867 | 0.005 | 2.400  | 0.003 |
| 1030110 | COG0601EP     | gbs0145 |       | Metabolism and transport        | Amino acids, peptides, aminosugars and amines                      | Oligopeptide transport system permease protein oppB                                      | 1.036 | 0.572 | 0.906 | 0.398 | 2.216  | 0.002 |
| 1031444 | COG1173EP     | gbs0146 | oppC  | Metabolism and transport        | Amino acids, peptides, aminosugars and amines                      | Oligopeptide transport system permease protein oppC                                      | 1.111 | 0.163 | 1.007 | 0.905 | 1.577  | 0.043 |
| 1031206 | COG0444EP     | gbs0147 | oppD  | Metabolism and transport        | Amino acids, peptides, aminosugars and amines                      | Oligopeptide transport ATP-binding protein oppD                                          | 0.945 | 0.285 | 1.053 | 0.301 | 1.953  | 0.001 |
| 1031432 | COG4608E      | gbs0148 | oppF  | Metabolism and transport        | Amino acids, peptides, aminosugars and amines                      | Oligopeptide transport ATP-binding protein oppF                                          | 0.907 | 0.008 | 1.039 | 0.309 | 1.601  | 0.001 |
| 1030799 | COG1947I      | gbs0149 |       | Metabolism and transport        | Fatty acid and phospholipids                                       | 4-diphosphocytidyl-2-C-methyl-D-erythritol kinase (EC 2.7.1.148)                         | 0.756 | 0.002 | 0.838 | 0.079 | 3.731  | 0.000 |
| 1030844 | COG1846K      | gbs0150 | adcR  | Cellular processes              | Transcription                                                      | Transcriptional regulator, MarR family                                                   | 0.921 | 0.426 | 0.891 | 0.123 | 5.792  | 0.000 |
| 1031199 | COG1121P      | gbs0151 | adcC  | Metabolism and transport        | Inorganic ion transport and metabolism                             | High-affinity zinc uptake system ATP-binding protein znuC                                | 0.696 | 0.000 | 0.897 | 0.030 | 5.966  | 0.000 |
| 1031194 | COG1108P      | gbs0152 | adcB  | Metabolism and transport        | Inorganic ion transport and metabolism                             | High-affinity zinc uptake system membrane protein znuB                                   | 0.762 | 0.002 | 0.938 | 0.176 | 14.469 | 0.000 |
| 1031196 | -             | gbs0153 |       | General function predicted only | Streptodornase (EC 3.1.21.1)                                       | Streptodornase (EC 3.1.21.1)                                                             | 1.274 | 0.054 | 1.036 | 0.727 | 0.431  | 0.005 |
| 1031384 | COG0162J      | gbs0154 | tyrS  | Cellular processes              | Translation, ribosomal structure and biogenesis                    | Tyrosyl-tRNA synthetase (EC 6.1.1.1)                                                     | 1.154 | 0.017 | 0.987 | 0.614 | 2.006  | 0.003 |
| 1031193 | COG0744M      | gbs0155 |       | Cell Envelope                   | Multimodular transpeptidase-transglycosylase PBP 1B (EC 2.4.1.129) | Multimodular transpeptidase-transglycosylase PBP 1B (EC 2.4.1.129)                       | 1.282 | 0.051 | 1.232 | 0.014 | 0.772  | 0.068 |
| 1031385 | COG0085K      | gbs0156 | rpoB  | Cellular processes              | Transcription                                                      | DNA-directed RNA polymerase beta chain (EC 2.7.7.6)                                      | 0.967 | 0.404 | 1.000 | 0.992 | 1.596  | 0.009 |
| 1031192 | COG0086K      | gbs0157 | rpoC  | Cellular processes              | Transcription                                                      | DNA-directed RNA polymerase beta chain (EC 2.7.7.6)                                      | 0.822 | 0.000 | 1.000 | 0.998 | 2.314  | 0.000 |
| 1031191 | -             | gbs0158 |       | General function predicted only | Putative DNA binding protein                                       | Putative DNA binding protein                                                             | 3.121 | 0.001 | 0.731 | 0.063 | 1.123  | 0.139 |
| 1030692 | COG2804NU     | gbs0159 | comYA | Cellular processes              | DNA transformation                                                 | ComG operon protein 1                                                                    | 0.152 | 0.001 | 0.821 | 0.802 | 0.224  | 0.336 |
| 1030286 | COG1459NU     | gbs0160 | comYB | Cellular processes              | DNA transformation                                                 | ComG operon protein 2                                                                    | 0.669 | 0.113 | 0.834 | 0.488 | 0.292  | 0.042 |
| 1031190 | COG4537U      | gbs0161 | comYC | Cellular processes              | DNA transformation                                                 | ComG operon protein 3                                                                    | 0.719 | 0.250 | 0.871 | 0.417 | 1.047  | 0.962 |
| 1030569 | COG2165NU     | gbs0162 |       | Cellular processes              | DNA transformation                                                 | ComG operon protein 4                                                                    | 1.033 | 0.805 | 0.561 | 0.069 | 0.560  | 0.097 |
| 1031678 | COG2165NU     | gbs0163 |       | Cellular processes              | DNA transformation                                                 | ComG operon protein 5                                                                    | 0.684 | 0.090 | 0.903 | 0.543 | 0.667  | 0.486 |
| 1031456 | COG4940U      | gbs0164 | comYD | Cellular processes              | DNA transformation                                                 | ComG operon protein 6                                                                    | 1.023 | 0.793 | 1.439 | 0.363 | 0.167  | 0.055 |
| 1031182 | -             | gbs0165 |       | Cellular processes              | DNA transformation                                                 | ComG operon protein 6                                                                    | 0.729 | 0.529 | 0.629 | 0.473 | 0.178  | 0.187 |
| 1030503 | COG0827L      | gbs0166 |       | Cellular processes              | DNA replication, recombination and repair                          | Adenine-specific methyltransferase (EC 2.1.1.72)                                         | 0.787 | 0.010 | 0.942 | 0.300 | 0.431  | 0.010 |
| 1031180 | COG0282C      | gbs0167 | ackA  | Metabolism and transport        | Energy production and conversion                                   | Acetate kinase (EC 2.7.2.1)                                                              | 0.877 | 0.011 | 1.108 | 0.023 | 0.667  | 0.001 |
| 1030243 | COG1476K      | gbs0168 |       | Cellular processes              | Transcription                                                      | Transcriptional regulator, Cro CI family                                                 | 1.589 | 0.000 | 1.702 | 0.001 | 0.735  | 0.110 |
| 1031383 | -             | gbs0169 |       | Hypothetical                    | Hypothetical                                                       | Hypothetical protein                                                                     | 2.043 | 0.008 | 1.997 | 0.002 | 0.492  | 0.005 |
| 1031177 | -             | gbs0170 |       | Cellular processes              | Posttranslational modification, protein turnover, chaperones       | CAAX amino terminal protease family                                                      | 1.431 | 0.002 | 1.334 | 0.006 | 0.824  | 0.198 |
| 1030209 | COG0345E      | gbs0171 | proC  | Metabolism and transport        | Amino acids, peptides, aminosugars and amines                      | Pyroline-5-carboxylate reductase (EC 1.5.1.2)                                            | 1.312 | 0.001 | 1.019 | 0.626 | 0.900  | 0.148 |
| 1030208 | COG1363G      | gbs0172 | pepA  | Metabolism and transport        | Carbohydrates, organic alcohols, and acids                         | Glutamyl aminopeptidase (EC 3.4.11.7)                                                    | 1.489 | 0.024 | 1.051 | 0.117 | 0.943  | 0.414 |
| 1031171 | -             | gbs0173 |       | Hypothetical                    | Hypothetical                                                       | Hypothetical protein                                                                     | 1.609 | 0.000 | 1.527 | 0.037 | 3.889  | 0.000 |
| 1031679 | -             | gbs0174 |       | Hypothetical                    | Hypothetical                                                       | Hypothetical membrane associated protein                                                 | 0.928 | 0.150 | 0.991 | 0.768 | 0.984  | 0.606 |
| 1030857 | COG0526OC     | gbs0175 |       | Metabolism and transport        | Energy production and conversion                                   | Thioredoxin                                                                              | 0.853 | 0.023 | 0.930 | 0.093 | 0.899  | 0.473 |
| 1030174 | COG0073R      | gbs0176 |       | General function predicted only | IRNA binding domain protein                                        | IRNA binding domain protein                                                              | 0.975 | 0.630 | 1.040 | 0.560 | 0.798  | 0.201 |
| 1031169 | COG0500QR     | gbs0177 |       | Metabolism and transport        | Secondary metabolites                                              | Methyltransferase (EC 2.1.1.-)                                                           | 2.527 | 0.000 | 1.381 | 0.052 | 1.096  | 0.593 |
|         |               |         |       |                                 |                                                                    |                                                                                          |       |       |       |       |        |       |

|         |                     |         |       |                                      |                                                 |                                                                                                 |         |       |       |       |       |       |
|---------|---------------------|---------|-------|--------------------------------------|-------------------------------------------------|-------------------------------------------------------------------------------------------------|---------|-------|-------|-------|-------|-------|
| 1031166 | COG0747E            | gbs0184 | dppA  | Metabolism and transport             | Amino acids, peptides, aminosugars and amines   | Dipeptide-binding protein                                                                       | 1.973   | 0.003 | 2.428 | 0.002 | 0.345 | 0.069 |
| 1030990 | COG0601EP           | gbs0185 | dppB  | Metabolism and transport             | Amino acids, peptides, aminosugars and amines   | Dipeptide transport system permease protein dppB                                                | 2.507   | 0.000 | 3.315 | 0.002 | 0.437 | 0.233 |
| 1030966 | COG1173EP           | gbs0186 | dppC  | Metabolism and transport             | Amino acids, peptides, aminosugars and amines   | Dipeptide transport system permease protein dppC                                                | 2.367   | 0.004 | 3.158 | 0.000 | 0.118 | 0.115 |
| 1031164 | COG0444EP           | gbs0187 | dppD  | Metabolism and transport             | Amino acids, peptides, aminosugars and amines   | Dipeptide transport ATP-binding protein dppD                                                    | 2.675   | 0.015 | 2.822 | 0.010 | 0.419 | 0.083 |
| 1030832 | COG1124EP           | gbs0188 | dppE  | Metabolism and transport             | Amino acids, peptides, aminosugars and amines   | Dipeptide transport ATP-binding protein dppE                                                    | 2.640   | 0.001 | 3.280 | 0.003 | 0.263 | 0.002 |
| 1031157 | COG1263G            | gbs0189 |       | Metabolism and transport             | Carbohydrates, organic alcohols, and acids      | PTS system, trehalose-specific IIBC component (EC 2.7.1.69) PTS system, trehalose-specific      | 2.853   | 0.064 | 1.219 | 0.611 | 0.807 | 0.282 |
| 1031158 | -                   | gbs0190 | dexS  | Metabolism and transport             | Carbohydrates, organic alcohols, and acids      | Trehalose-6-phosphate hydrolase (EC 3.2.1.93)                                                   | 1.463   | 0.020 | 1.114 | 0.214 | 0.497 | 0.002 |
| 1031156 | COG1762GT, COG1762G | gbs0191 |       | Cellular processes                   | Transcription                                   | Transcription antiterminator, BglG family PTS system, mannitol (Cryptic)-specific IIA component | 0.279   | 0.007 | 0.478 | 0.205 | 2.304 | 0.006 |
| 1030573 | COG3414G            | gbs0192 |       | Metabolism and transport             | Carbohydrates, organic alcohols, and acids      | PTS SYSTEM, IIB COMPONENT (EC 2.7.1.69)                                                         | 0.481   | 0.047 | 0.718 | 0.156 | 2.255 | 0.011 |
| 1029829 | -                   | gbs0193 | ulaA  | Transport and binding proteins       | Unknown substrate                               | Putative transport protein sgaT                                                                 | 0.594   | 0.052 | 1.005 | 0.941 | 1.984 | 0.029 |
| 1030740 | COG3959G            | gbs0194 |       | Metabolism and transport             | Carbohydrates, organic alcohols, and acids      | Transketolase (EC 2.2.1.1)                                                                      | 0.754   | 0.000 | 0.969 | 0.852 | 2.013 | 0.016 |
| 1031454 | COG3958G            | gbs0195 |       | Metabolism and transport             | Carbohydrates, organic alcohols, and acids      | Transketolase (EC 2.2.1.1)                                                                      | 0.774   | 0.042 | 0.947 | 0.596 | 1.776 | 0.048 |
| 1031153 | COG4097P            | gbs0196 |       | Metabolism and transport             | Inorganic ion transport and metabolism          | Vanillate O-demethylase oxidoreductase (EC 1.14.13.-)                                           | 1.417   | 0.038 | 0.251 | 0.004 | 1.185 | 0.548 |
| 1031150 | -                   | gbs0197 | rpsO  | Cellular processes                   | Translation, ribosomal structure and biogenesis | SSU ribosomal protein S15P                                                                      | 0.911   | 0.088 | 1.108 | 0.043 | 1.312 | 0.159 |
| 1031145 | COG1185J            | gbs0198 | pnpA  | Cellular processes                   | Translation, ribosomal structure and biogenesis | Polyribonucleotide nucleotidyltransferase (EC 2.7.7.8) Polynucleotide adenylyltransferase (EC   | 0.899   | 0.045 | 1.163 | 0.001 | 2.838 | 0.000 |
| 1030002 | -                   | gbs0199 |       | Hypothetical                         |                                                 | Hypothetical protein                                                                            | 0.928   | 0.011 | 1.142 | 0.009 | 2.877 | 0.000 |
| 1031138 | COG1045E            | gbs0200 | cysE  | Metabolism and transport             | Amino acids, peptides, aminosugars and amines   | Serine acetyltransferase (EC 2.3.1.30)                                                          | 1.092   | 0.319 | 1.261 | 0.024 | 3.022 | 0.000 |
| 1031141 | -                   | gbs0201 |       | Hypothetical                         |                                                 | Hypothetical protein                                                                            | 1.260   | 0.121 | 1.461 | 0.003 | 2.082 | 0.004 |
| 1031132 | COG0215J            | gbs0202 | cysS  | Cellular processes                   | Translation, ribosomal structure and biogenesis | CysteinyI-RNA synthetase (EC 6.1.1.16)                                                          | 1.026   | 0.615 | 1.341 | 0.006 | 2.858 | 0.005 |
| 1031126 | COG1939S            | gbs0203 |       | Hypothetical                         |                                                 | Hypothetical protein                                                                            | 1.214   | 0.097 | 1.306 | 0.032 | 2.863 | 0.042 |
| 1031127 | COG0566J            | gbs0204 |       | Cellular processes                   | Translation, ribosomal structure and biogenesis | 23S rRNA Gm2251 methyltransferase (EC 2.1.1.-)                                                  | 0.817   | 0.091 | 0.833 | 0.124 | 0.979 | 0.795 |
| 1031004 | -                   | gbs0205 |       | Hypothetical                         |                                                 | Hypothetical cytosolic protein                                                                  | 0.896   | 0.011 | 1.033 | 0.423 | 0.757 | 0.028 |
| 1030748 | COG1307S            | gbs0206 |       | Metabolism and transport             | Fatty acid and phospholipids                    | Fatty acid-binding protein, DeqV family                                                         | 1.258   | 0.000 | 1.261 | 0.002 | 0.976 | 0.768 |
| 1030907 | COG1476K            | gbs0207 |       | Cellular processes                   | Transcription                                   | Transcriptional regulator, Cro CI family                                                        | 2.149   | 0.003 | 0.962 | 0.866 | 0.660 | 0.059 |
| 1030906 | COG2826L            | gbs0208 |       | Mobile and extrachromosomal elements |                                                 | Transposase                                                                                     | 1.136   | 0.530 | 0.645 | 0.007 | 0.323 | 0.001 |
| 1030745 | -                   | gbs0209 | rpmM  | Cellular processes                   | Translation, ribosomal structure and biogenesis | LSU ribosomal protein L13P                                                                      | 0.777   | 0.003 | 1.079 | 0.007 | 1.482 | 0.041 |
| 1031664 | -                   | gbs0210 | rpsI  | Cellular processes                   | Translation, ribosomal structure and biogenesis | SSU ribosomal protein S9P                                                                       | 0.854   | 0.032 | 1.159 | 0.033 | 1.061 | 0.747 |
| 1031123 | COG0582L            | gbs0211 | int.1 | Mobile and extrachromosomal elements |                                                 | DNA integration recombination inversion protein                                                 | 0.861   | 0.027 | 0.722 | 0.057 | 0.581 | 0.033 |
| 1031018 | -                   | gbs0212 |       | Hypothetical                         |                                                 | Hypothetical protein                                                                            | 0.820   | 0.044 | 0.767 | 0.026 | 0.452 | 0.003 |
| 1030061 | -                   | gbs0213 |       | Hypothetical                         |                                                 | Hypothetical protein                                                                            | 0.285   | 0.001 | 0.668 | 0.055 | 0.174 | 0.016 |
| 1030798 | -                   | gbs0214 |       | Hypothetical                         |                                                 | Hypothetical protein                                                                            | 0.363   | 0.017 | 0.634 | 0.048 | 0.234 | 0.048 |
| 1031124 | -                   | gbs0215 |       | Hypothetical                         |                                                 | Hypothetical protein                                                                            | 0.284   | 0.000 | 0.574 | 0.086 | 0.420 | 0.099 |
| 1030509 | COG1393P            | gbs0216 |       | Hypothetical                         |                                                 | Hypothetical protein                                                                            | 0.374   | 0.001 | 0.568 | 0.007 | 0.349 | 0.136 |
| 1031448 | -                   | gbs0217 |       | General function predicted only      |                                                 | Replication initiation protein, RepA family                                                     | 0.327   | 0.001 | 0.529 | 0.036 | 0.255 | 0.006 |
| 1031014 | -                   | gbs0218 |       | Hypothetical                         |                                                 | Hypothetical protein                                                                            | 0.390   | 0.004 | 0.543 | 0.050 | 0.272 | 0.051 |
| 1031125 | COG1196D            | gbs0219 |       | Mobile and extrachromosomal elements |                                                 | Plasmid recombination protein, Mob family                                                       | 0.378   | 0.004 | 0.444 | 0.006 | 0.497 | 0.058 |
| 1029846 | -                   | gbs0220 |       | Hypothetical                         |                                                 | Hypothetical protein                                                                            | 0.422   | 0.014 | 0.449 | 0.003 | 0.366 | 0.001 |
| 1030479 | -                   | gbs0221 |       | Hypothetical                         |                                                 | Hypothetical cytosolic protein                                                                  | 1.210   | 0.008 | 1.096 | 0.254 | 0.566 | 0.035 |
| 1030793 | -                   | gbs0222 |       | Cellular processes                   | DNA replication, recombination and repair       | DNA-damage-inducible protein J                                                                  | 1.278   | 0.027 | 1.175 | 0.040 | 0.575 | 0.003 |
| 1030797 | COG4842S            | gbs0223 |       | Hypothetical                         |                                                 | Hypothetical protein                                                                            | 3.464   | 0.000 | 1.813 | 0.004 | 1.258 | 0.249 |
| 1030450 | -                   | gbs0224 |       | Hypothetical                         |                                                 | Hypothetical protein                                                                            | 3.033   | 0.002 | 1.562 | 0.017 | 1.076 | 0.661 |
| 1031146 | -                   | gbs0225 |       | Cellular processes                   | DNA replication, recombination and repair       | Hypothetical protein                                                                            | 2.772   | 0.002 | 1.725 | 0.001 | 2.025 | 0.000 |
| 1031149 | -                   | gbs0226 |       | Hypothetical                         |                                                 | Hypothetical protein                                                                            | 3.274   | 0.000 | 1.751 | 0.001 | 1.636 | 0.023 |
| 1030786 | -                   | gbs0228 |       | Hypothetical                         |                                                 | Hypothetical protein                                                                            | 2.935   | 0.000 | 1.991 | 0.005 | 2.220 | 0.007 |
| 1031152 | -                   | gbs0229 |       | Hypothetical                         |                                                 | Hypothetical protein                                                                            | 2.168   | 0.000 | 1.712 | 0.002 | 1.979 | 0.007 |
| 1029878 | -                   | gbs0230 | mutR  | Cellular processes                   | Transcription                                   | Transcriptional regulator                                                                       | 1.360   | 0.009 | 0.996 | 0.890 | 3.237 | 0.021 |
| 1030927 | -                   | gbs0231 | meE   | Cellular processes                   | Toxin production and resistance                 | Macrolide-efflux protein                                                                        | 2.280   | 0.013 | 1.565 | 0.006 | 5.613 | 0.005 |
| 1031154 | COG1174E            | gbs0232 |       | Metabolism and transport             | Amino acids, peptides, aminosugars and amines   | Glycine betaine carnitine choline transport system permease protein opuCD                       | 1.087   | 0.078 | 0.961 | 0.167 | 1.791 | 0.006 |
| 1031424 | COG1732M            | gbs0233 |       | Metabolism and transport             | Amino acids, peptides, aminosugars and amines   | Glycine betaine carnitine choline-binding protein                                               | 1.183   | 0.015 | 0.930 | 0.160 | 1.544 | 0.003 |
| 1031155 | COG1174E            | gbs0234 |       | Metabolism and transport             | Amino acids, peptides, aminosugars and amines   | Glycine betaine carnitine choline transport system permease protein opuCB                       | 1.373   | 0.103 | 0.871 | 0.087 | 1.441 | 0.026 |
| 1030037 | COG1125E            | gbs0235 |       | Metabolism and transport             | Amino acids, peptides, aminosugars and amines   | Glycine betaine carnitine choline transport ATP-binding protein opuCA                           | 1.183   | 0.028 | 1.002 | 0.977 | 1.860 | 0.001 |
| 1030836 | -                   | gbs0236 |       | Hypothetical                         |                                                 | Hypothetical protein                                                                            | 1.581   | 0.020 | 0.688 | 0.091 | 0.671 | 0.230 |
| 1031440 | COG0582L            | gbs0237 |       | Mobile and extrachromosomal elements |                                                 | DNA integration recombination inversion protein                                                 | 2.241   | 0.001 | 2.886 | 0.043 | 1.032 | 0.897 |
| 1031168 | -                   | gbs0238 |       | Hypothetical                         |                                                 | Hypothetical protein                                                                            | 1.593   | 0.003 | 2.479 | 0.002 | 1.496 | 0.029 |
| 1031172 | -                   | gbs0239 |       | General function predicted only      |                                                 | Rep protein                                                                                     | 1.858   | 0.001 | 2.848 | 0.006 | 1.640 | 0.021 |
| 1031173 | -                   | gbs0240 |       | Hypothetical                         |                                                 | Hypothetical protein                                                                            | 1.659   | 0.000 | 2.332 | 0.000 | 1.359 | 0.094 |
| 1031453 | COG1674D            | gbs0241 |       | Cellular processes                   | Cell division                                   | FtsK SpoIIIE family                                                                             | 1.723   | 0.001 | 2.304 | 0.000 | 1.081 | 0.692 |
| 1031174 | -                   | gbs0242 |       | Hypothetical                         |                                                 | Hypothetical protein                                                                            | 1.528   | 0.003 | 2.322 | 0.001 | 0.905 | 0.585 |
| 1030826 | -                   | gbs0243 |       | Hypothetical                         |                                                 | Hypothetical protein                                                                            | 1.989   | 0.026 | 2.172 | 0.001 | 0.801 | 0.185 |
| 1030232 | -                   | gbs0244 |       | Hypothetical                         |                                                 | Hypothetical protein                                                                            | 0.881   | 0.081 | 0.631 | 0.007 | 0.941 | 0.219 |
| 1031189 | COG1670J            | gbs0245 |       | Metabolism and transport             | Central intermediary metabolism                 | Acetyltransferase (EC 2.3.1.-)                                                                  | 1.353   | 0.020 | 0.795 | 0.013 | 2.321 | 0.000 |
| 1031175 | COG1670J            | gbs0246 |       | Cellular processes                   | Translation, ribosomal structure and biogenesis | Ribosomal-protein-alanine acetyltransferase (EC 2.3.1.128)                                      | 1.458   | 0.002 | 0.813 | 0.026 | 1.873 | 0.013 |
| 1030934 | COG1670J            | gbs0247 |       | Cellular processes                   | Translation, ribosomal structure and biogenesis | Ribosomal-protein-serine acetyltransferase (EC 2.3.1.-)                                         | 1.679   | 0.001 | 0.842 | 0.079 | 1.911 | 0.002 |
| 1031386 | -                   | gbs0248 |       | general function predicted only      |                                                 | ECF-type sigma factor negative effector                                                         | 1.556   | 0.021 | 1.083 | 0.638 | 0.843 | 0.502 |
| 1030245 | COG1595K            | gbs0249 |       | Cellular processes                   | Transcription                                   | RNA polymerase ECF-type sigma factor                                                            | 1.374   | 0.008 | 1.147 | 0.268 | 0.700 | 0.213 |
| 1031184 | COG1309K            | gbs0250 |       | Cellular processes                   | Transcription                                   | Transcriptional regulator, TetR family                                                          | 1.180   | 0.142 | 1.175 | 0.142 | 1.023 | 0.900 |
| 1031185 | COG0842V            | gbs0251 | sagI  | Transport and binding proteins       | Unknown substrate                               | ABC transporter permease protein                                                                | 0.571   | 0.028 | 0.803 | 0.297 | 0.578 | 0.555 |
| 1031420 | COG1131V            | gbs0252 | sagG  | Cellular processes                   | Toxin production and resistance                 | Daunorubicin resistance ATP-binding protein drRA                                                | 0.850   | 0.257 | 0.606 | 0.244 | 0.217 | 0.058 |
| 1031187 | -                   | gbs0253 |       | Hypothetical                         |                                                 | Hypothetical protein                                                                            | 1.189   | 0.054 | 0.879 | 0.412 | 0.458 | 0.063 |
| 1031382 | COG1695K            | gbs0254 |       | Cellular processes                   | Transcription                                   | Transcriptional regulator, PadR family                                                          | 1.025   | 0.694 | 0.737 | 0.082 | 0.672 | 0.129 |
| 1030359 | -                   | gbs0255 |       | Hypothetical                         |                                                 | Hypothetical protein                                                                            | 0.686   | 0.003 | 0.712 | 0.000 | 1.092 | 0.193 |
| 1031426 | COG1820G            | gbs0256 | nagA  | Metabolism and transport             | Carbohydrates, organic alcohols, and acids      | N-acetylglucosamine-6-phosphate deacetylase (EC 3.5.1.25)                                       | 0.874   | 0.121 | 0.534 | 0.000 | 0.552 | 0.034 |
| 1030358 | -                   | gbs0257 |       | Hypothetical                         |                                                 | Hypothetical membrane spanning protein                                                          | 0.711   | 0.000 | 0.409 | 0.001 | 0.664 | 0.008 |
| 1030838 | -                   | gbs0258 | glyQ  | Cellular processes                   | Translation, ribosomal structure and biogenesis | Glycyl-tRNA synthetase alpha chain (EC 6.1.1.14)                                                | 0.736   | 0.001 | 0.886 | 0.014 | 1.663 | 0.058 |
| 1031429 | COG1182I            | gbs0259 |       | Metabolism and transport             | Fatty acid and phospholipids                    | FMN-dependent NADH-azoreductase (EC 1.6.99.2)                                                   | 0.781   | 0.021 | 0.933 | 0.068 | 1.630 | 0.008 |
| 1031195 | COG0751J            | gbs0260 | glyS  | Cellular processes                   | Translation, ribosomal structure and biogenesis | Glycyl-tRNA synthetase beta chain (EC 6.1.1.14)                                                 | 0.713   | 0.002 | 0.852 | 0.022 | 1.535 | 0.002 |
| 1030775 | -                   | gbs0261 |       | Hypothetical                         |                                                 | Hypothetical cytosolic protein                                                                  | 0.705   | 0.002 | 0.916 | 0.005 | 1.153 | 0.155 |
| 1030809 | -                   | gbs0262 |       | Hypothetical                         |                                                 | Hypothetical membrane spanning protein                                                          | 0.534   | 0.004 | 0.795 | 0.003 | 1.218 | 0.183 |
| 1030693 | COG0554C            | gbs0263 | glpK  | Metabolism and transport             | Energy production and conversion                | Glycerol kinase (EC 2.7.1.30)                                                                   | 0.620   | 0.010 | 0.794 | 0.013 | 1.119 | 0.394 |
| 1031442 | COG0578C            | gbs0264 | glpD  | Metabolism and transport             | Energy production and conversion                | Alpha-glycerophosphate oxidase (EC 1.1.3.21)                                                    | 0.644   | 0.003 | 0.799 | 0.122 | 1.849 | 0.005 |
| 1030430 | -                   | gbs0265 | glpF  | Metabolism and transport             | Carbohydrates, organic alcohols, and acids      | Glycerol uptake facilitator protein                                                             | 0.622   | 0.052 | 0.902 | 0.085 | 1.688 | 0.003 |
| 1031204 | COG0446R            | gbs0266 |       | Metabolism and transport             | Central intermediary metabolism                 | NADH peroxidase (EC 1.11.1.1)                                                                   | 0.606   | 0.002 | 0.807 | 0.098 | 3.072 | 0.004 |
| 1030416 | -                   | gbs0267 | mga   | Hypothetical                         |                                                 | trans-acting positive regulator                                                                 | 0.560   | 0.007 | 0.850 | 0.045 | 3.116 | 0.002 |
| 1030442 | COG0021G            | gbs0268 | tkf   | Metabolism and transport             | Carbohydrates, organic alcohols, and acids      | Transketolase (EC 2.2.1.1)                                                                      | 1.185   | 0.168 | 0.950 | 0.462 | 2.166 | 0.001 |
| 1030385 | -                   | gbs0269 |       | Hypothetical                         |                                                 | Hypothetical protein                                                                            | 1.877   | 0.001 | 0.954 | 0.407 | 6.128 | 0.000 |
| 1031207 | COG1131V            | gbs0270 |       | Transport and binding proteins       | Unknown substrate                               | ABC transporter ATP-binding protein                                                             | 1.602   | 0.000 | 0.983 | 0.521 | 4.587 | 0.000 |
| 1030079 | -                   | gbs0271 |       | Transport and binding proteins       | Unknown substrate                               | ABC transporter permease protein                                                                | 1.700   | 0.002 | 1.091 | 0.198 | 4.457 | 0.000 |
| 1031209 | COG1263G            | gbs0272 |       | Metabolism and transport             | Carbohydrates, organic alcohols, and acids      | PTS system, beta-glucoside-specific IIBC component (EC 2.7.1.69)                                | 1.870   | 0.022 | 0.848 | 0.405 | 0.422 | 0.164 |
| 1031210 | COG0263E            | gbs0273 | proB  | Metabolism and transport             | Amino acids, peptides, aminosugars and amines   | Glutamate 5-kinase (EC 2.7.2.11)                                                                | 1.111   | 0.116 | 1.277 | 0.006 | 0.682 | 0.012 |
| 1031437 | COG0014E            | gbs0274 | proA  | Metabolism and transport             | Amino acids, peptides, aminosugars and amines   | Gamma-glutamyl phosphate reductase (EC 1.2.1.41)                                                | 0.987   | 0.794 | 1.227 | 0.004 | 0.885 | 0.453 |
| 1031208 | -                   | gbs0275 | mraW  | General function predicted only      |                                                 | S-adenosyl-methyltransferase mraW (EC 2.1.1.-)                                                  | 0.960   | 0.160 | 1.139 | 0.122 | 0.972 | 0.849 |
| 1030691 | -                   | gbs0276 | ftsL  | Cellular processes                   | Cell division                                   | Cell division protein ftsL                                                                      | 1.015</ |       |       |       |       |       |



|           |              |          |           |                                 |                                                                   |                                                                                        |       |       |       |       |        |       |
|-----------|--------------|----------|-----------|---------------------------------|-------------------------------------------------------------------|----------------------------------------------------------------------------------------|-------|-------|-------|-------|--------|-------|
| 1031219   | COG0768M     | gbs0277  |           | Cell Envelope                   | Biosynthesis and degradation of murein sacculus and peptidoglycan | Division specific D,D-transpeptidase Cell division protein ftsI                        | 0.850 | 0.082 | 1.253 | 0.004 | 0.957  | 0.574 |
| 1030464   | COG0472M     | gbs0278  | mraY      | Cell Envelope                   | Biosynthesis and degradation of murein sacculus and peptidoglycan | Phospho-N-acetylmuramoyl-pentapeptide-transferase (EC 2.7.8.13)                        | 0.958 | 0.435 | 1.478 | 0.002 | 0.854  | 0.026 |
| 1031649   | COG0513L.KJ  | gbs0279  |           | Cellular processes              | DNA replication, recombination and repair                         | ATP-dependent RNA helicase                                                             | 1.230 | 0.172 | 1.120 | 0.131 | 0.901  | 0.523 |
| 1031220   | COG0834E.T   | gbs0280  |           | Transport and binding proteins  | Unknown substrate                                                 | ABC transporter substrate-binding protein                                              | 0.766 | 0.003 | 1.220 | 0.040 | 2.939  | 0.004 |
| 1030039   | COG0765E     | gbs0281  |           | Metabolism and transport        | Amino acids, peptides, aminosugars and amines                     | Amino acid ABC transporter permease protein                                            | 0.764 | 0.000 | 1.263 | 0.040 | 1.871  | 0.024 |
| 1030231   | COG1126E     | gbs0282  |           | Metabolism and transport        | Amino acids, peptides, aminosugars and amines                     | Amino acid ABC transporter ATP-binding protein                                         | 0.901 | 0.036 | 1.394 | 0.003 | 1.647  | 0.004 |
| 1030089   | -            | gbs0283  | aapA      | Hypothetical                    |                                                                   | Hypothetical membrane associated protein                                               | 1.411 | 0.026 | 1.189 | 0.007 | 1.122  | 0.220 |
| 1030075   | COG0492O     | gbs0284  | trxB      | Metabolism and transport        | Energy production and conversion                                  | Thioredoxin reductase (EC 1.8.1.9)                                                     | 1.129 | 0.098 | 0.951 | 0.458 | 1.183  | 0.339 |
| 1030696   | COG1488H     | gbs0285  | nadE      | Metabolism and transport        | Cofactors, prosthetic groups, and carriers                        | Nicotinate phosphoribosyltransferase (EC 2.4.2.11)                                     | 1.078 | 0.516 | 0.898 | 0.274 | 2.131  | 0.008 |
| 1031238   | COG0171H     | gbs0286  | nadE      | Metabolism and transport        | Cofactors, prosthetic groups, and carriers                        | NH(3)-dependent NAD(+) synthetase (EC 6.3.5.1)                                         | 1.109 | 0.125 | 0.970 | 0.302 | 2.314  | 0.000 |
| 1030350   | COG3579E     | gbs0287  | pepC      | Metabolism and transport        | Amino acids, peptides, aminosugars and amines                     | Aminopeptidase C (EC 3.4.22.40)                                                        | 1.920 | 0.001 | 2.278 | 0.000 | 1.377  | 0.039 |
| 1031240   | COG0744M     | gbs0288  |           | Cell Envelope                   | Biosynthesis and degradation of murein sacculus and peptidoglycan | Multimodular transpeptidase-transglycosylase PBP 1A                                    | 1.020 | 0.570 | 1.035 | 0.182 | 1.944  | 0.000 |
| 1031247   | COG3331R     | gbs0289  | recU      | Cellular processes              | DNA replication, recombination, and repair                        | Recombination protein recU                                                             | 1.323 | 0.009 | 1.103 | 0.119 | 1.327  | 0.187 |
| 1031242   | -            | gbs0290  |           | Hypothetical                    |                                                                   | Hypothetical cytosolic protein                                                         | 1.797 | 0.000 | 1.920 | 0.004 | 0.804  | 0.503 |
| 1030697   | COG3599D     | gbs0291  |           | Cellular processes              | Cell division                                                     | Cell division initiation protein DivIVA                                                | 1.239 | 0.016 | 1.098 | 0.011 | 0.698  | 0.093 |
| 1031245   | COG0116L     | gbs0292  |           | Metabolism and transport        | Central intermediary metabolism                                   | Methyltransferase (EC 2.1.1.-)                                                         | 1.318 | 0.000 | 1.223 | 0.011 | 1.662  | 0.000 |
| 1031248   | -            | gbs0293  |           | Hypothetical                    |                                                                   | Hypothetical protein                                                                   | 1.057 | 0.303 | 1.070 | 0.047 | 0.882  | 0.125 |
| 1030700   | -            | gbs0294  | luxS      | Cellular processes              | Signal transduction                                               | Autoinducer-2 production protein luxS (EC 3.13.1.-)                                    | 0.790 | 0.009 | 0.839 | 0.029 | 2.030  | 0.006 |
| 1031251   | COG1418R     | gbs0295  |           | Metabolism and transport        | Central intermediary metabolism                                   | Hydrolase (HAD superfamily)                                                            | 0.938 | 0.210 | 0.927 | 0.188 | 0.672  | 0.078 |
| 1031256   | COG1131V     | gbs0296  |           | Transport and binding proteins  | Unknown substrate                                                 | ABC transporter ATP-binding protein                                                    | 1.846 | 0.012 | 1.732 | 0.080 | 1.123  | 0.548 |
| 1031254   | COG0842V     | gbs0297  |           | Transport and binding proteins  | Unknown substrate                                                 | ABC transporter permease protein                                                       | 2.520 | 0.002 | 1.827 | 0.017 | 0.802  | 0.214 |
| 1031261   | COG4585T     | gbs0298  |           | Cellular processes              | Signal transduction                                               | Sensory Transduction Histidine Kinase (EC 2.7.3.-)                                     | 2.240 | 0.010 | 1.860 | 0.003 | 1.327  | 0.012 |
| 1030718   | COG2197TK    | gbs0299  |           | Cellular processes              | Signal transduction                                               | Two-component response regulator                                                       | 1.693 | 0.000 | 1.589 | 0.001 | 0.938  | 0.501 |
| 1030702   | -            | gbs0300  |           | Hypothetical                    |                                                                   | Hypothetical membrane spanning protein                                                 | 2.045 | 0.000 | 1.678 | 0.001 | 0.878  | 0.258 |
| 1031266   | COG0194F     | gbs0301  | gmk       | Metabolism and transport        | Purines, pyrimidines, nucleosides, and nucleotides                | Guanylate kinase (EC 2.7.4.8)                                                          | 0.848 | 0.005 | 0.868 | 0.013 | 1.358  | 0.003 |
| 1031267   | COG1758K     | gbs0302  |           | Cellular processes              | Transcription                                                     | DNA-directed RNA polymerase omega chain (EC 2.7.7.6)                                   | 0.810 | 0.003 | 0.754 | 0.000 | 1.401  | 0.052 |
| 1031268   | COG1198L     | gbs0303  | priA      | Cellular processes              | DNA replication, recombination and repair                         | Primosomal protein N                                                                   | 0.734 | 0.017 | 0.811 | 0.120 | 0.855  | 0.332 |
| 1031270   | COG0223J     | gbs0304  | fnt       | Cellular processes              | Translation, ribosomal structure and biogenesis                   | Methionyl-tRNA formyltransferase (EC 2.1.2.9)                                          | 0.991 | 0.930 | 0.958 | 0.353 | 1.004  | 0.955 |
| 1030722   | COG0144J     | gbs0305  | sunL      | Cellular processes              | Translation, ribosomal structure and biogenesis                   | 16S rRNA m(5C) 967 methyltransferase (EC 2.1.1.-)                                      | 0.938 | 0.237 | 0.941 | 0.562 | 1.290  | 0.101 |
| 1031295   | COG0631T     | gbs0306  | stp1/pppL | Cellular processes              | Signal transduction                                               | Protein phosphatase 2C (EC 3.1.3.16)                                                   | 1.035 | 0.224 | 1.037 | 0.400 | 1.888  | 0.002 |
| 1030725   | COG0515R.TKL | gbs0307  | stk1      | Cellular processes              | Signal transduction                                               | Serine threonine protein kinase (EC 2.7.1.37)                                          | 1.066 | 0.048 | 1.054 | 0.042 | 1.697  | 0.000 |
| 1030188   | COG4758S     | gbs0308  | yvqF      | Transport and binding proteins  | Unknown substrate                                                 | Transporter yvqF                                                                       | 0.833 | 0.016 | 0.730 | 0.004 | 1.046  | 0.562 |
| 1031297   | COG4585T     | gbs0309  | yvqE      | Cellular processes              | Signal transduction                                               | Two-component sensor protein yvqE (EC 2.7.3.-)                                         | 0.663 | 0.004 | 0.720 | 0.001 | 0.866  | 0.395 |
| 1031299   | COG2197TK    | gbs0310  | yvqC      | Cellular processes              | Signal transduction                                               | Two-component response regulator yvqC                                                  | 0.673 | 0.001 | 0.756 | 0.004 | 0.958  | 0.766 |
| 1031439   | COG0561R     | COG0561R | COG0561R  | Metabolism and transport        | Central intermediary metabolism                                   | Peptidyl-prolyl cis-trans isomerase (EC 5.2.1.8)                                       | 0.934 | 0.065 | 0.919 | 0.009 | 1.120  | 0.084 |
| 1030520   | COG1098J     | gbs0312  |           | Cellular processes              | Translation, ribosomal structure and biogenesis                   | S1-type RNA-binding domain                                                             | 1.068 | 0.311 | 0.948 | 0.389 | 1.073  | 0.534 |
| 1030470   | COG1180O     | gbs0313  |           | Metabolism and transport        | Energy production and conversion                                  | Pyruvate formate-lyase activating enzyme (EC 1.97.1.4)                                 | 1.142 | 0.251 | 1.148 | 0.211 | 0.552  | 0.000 |
| 1031443   | COG1349KG    | gbs0314  |           | Cellular processes              | Transcription                                                     | Transcriptional regulator, DeoR family                                                 | 0.581 | 0.001 | 0.716 | 0.011 | 1.967  | 0.000 |
| 1031449   | COG2390K     | gbs0315  |           | Cellular processes              | Transcription                                                     | Transcriptional regulatory protein                                                     | 0.991 | 0.954 | 0.834 | 0.190 | 1.259  | 0.139 |
| 1031313   | -            | gbs0316  |           | Metabolism and transport        | Carbohydrates, organic alcohols, and acids                        | PTS system, cellobiose-specific IIA component (EC 2.7.1.69)                            | 1.176 | 0.417 | 0.962 | 0.649 | 0.349  | 0.047 |
| 1031316   | COG1440G     | gbs0317  |           | Metabolism and transport        | Carbohydrates, organic alcohols, and acids                        | PTS system, cellobiose-specific IIB component (EC 2.7.1.69)                            | 0.821 | 0.173 | 0.826 | 0.362 | 0.465  | 0.005 |
| 1030527   | COG1455G     | gbs0318  |           | Metabolism and transport        | Carbohydrates, organic alcohols, and acids                        | PTS system, cellobiose-specific IIC component (EC 2.7.1.69)                            | 0.888 | 0.147 | 1.124 | 0.461 | 0.532  | 0.013 |
| 1030546   | COG1882C     | gbs0319  | pflD      | Metabolism and transport        | Energy production and conversion                                  | Formate acetyltransferase (EC 2.3.1.54)                                                | 1.333 | 0.062 | 0.940 | 0.663 | 0.375  | 0.014 |
| 1031318   | -            | gbs0320  | mjpB      | Metabolism and transport        | Energy production and conversion                                  | Transaldolase (EC 2.2.1.2)                                                             | 1.030 | 0.628 | 0.798 | 0.239 | 0.383  | 0.004 |
| 1030547   | COG0371C     | gbs0321  | gldA      | Metabolism and transport        | Energy production and conversion                                  | Glycerol dehydrogenase (EC 1.1.1.6)                                                    | 1.450 | 0.032 | 0.914 | 0.423 | 0.390  | 0.005 |
| 1031319   | COG0031E     | gbs0322  | cykK      | Metabolism and transport        | Amino acids, peptides, aminosugars and amines                     | Cysteine synthase (EC 2.5.1.147)                                                       | 0.554 | 0.000 | 1.204 | 0.051 | 3.195  | 0.002 |
| 1030550   | COG1739S     | gbs0323  |           | Hypothetical                    |                                                                   | Hypothetical protein                                                                   | 1.112 | 0.321 | 1.518 | 0.046 | 0.878  | 0.789 |
| 1031416   | COG4098L     | gbs0324  | comFA     | Cellular processes              | DNA transformation                                                | COMF operon protein 1                                                                  | 0.371 | 0.007 | 0.426 | 0.024 | 0.331  | 0.201 |
| 1031320   | COG1040R     | gbs0325  | comFC     | General function predicted only |                                                                   | COMF operon protein 3                                                                  | 0.578 | 0.077 | 0.754 | 0.185 | 0.208  | 0.050 |
| 1030561   | COG1544J     | gbs0326  |           | Cellular processes              | Translation, ribosomal structure and biogenesis                   | Ribosome-associated factor Y                                                           | 2.332 | 0.001 | 1.842 | 0.000 | 0.565  | 0.006 |
| 1031329   | COG0527E     | gbs0327  |           | Metabolism and transport        | Amino acids, peptides, aminosugars and amines                     | Aspartokinase (EC 2.7.2.4)                                                             | 0.424 | 0.000 | 0.400 | 0.002 | 0.702  | 0.078 |
| 1031799   | COG0637R     | gbs0328  |           | Metabolism and transport        | Carbohydrates, organic alcohols, and acids                        | Beta-phosphoglucomutase (EC 5.4.2.6) Glucose-1-phosphate phosphodismutase (EC 2.7.1.4) | 0.796 | 0.017 | 0.956 | 0.340 | 1.524  | 0.038 |
| 1031330   | COG1024I     | gbs0329  | phaB      | Metabolism and transport        | Fatty acid and phospholipids                                      | Enoyl-CoA hydratase (EC 4.2.1.17)                                                      | 1.065 | 0.052 | 1.255 | 0.006 | 7.297  | 0.000 |
| 1031333   | COG1846K     | gbs0330  |           | Cellular processes              | Transcription                                                     | Transcriptional regulator, MarR family                                                 | 1.072 | 0.029 | 1.184 | 0.011 | 0.848  | 0.397 |
| 1030728   | COG0332I     | gbs0331  | fabH      | Metabolism and transport        | Fatty acid and phospholipids                                      | 3-oxoacyl-[acyl-carrier-protein] synthase III (EC 2.3.1.41)                            | 1.100 | 0.017 | 1.234 | 0.022 | 0.845  | 0.309 |
| 1031336   | COG0236IQ    | gbs0332  | acpP      | Metabolism and transport        | Fatty acid and phospholipids                                      | Acyl carrier protein                                                                   | 1.178 | 0.004 | 1.240 | 0.038 | 0.941  | 0.674 |
| 1031832   | COG2070R     | gbs0333  | fabK      | Metabolism and transport        | Fatty acid and phospholipids                                      | Enoyl-[acyl-carrier protein] reductase (NADH) (EC 1.3.1.9)                             | 1.014 | 0.381 | 1.164 | 0.060 | 1.322  | 0.022 |
| 1031797   | COG0331I     | gbs0334  | fabD      | Metabolism and transport        | Fatty acid and phospholipids                                      | Malonyl-CoA-[acyl-carrier-protein] transacylase (EC 2.3.1.39)                          | 0.995 | 0.856 | 1.189 | 0.048 | 1.574  | 0.027 |
| 1030587   | COG1028IQ    | gbs0335  | fabG      | Metabolism and transport        | Fatty acid and phospholipids                                      | 3-oxoacyl-[acyl-carrier protein] reductase (EC 1.1.1.100)                              | 0.976 | 0.307 | 1.202 | 0.023 | 1.166  | 0.023 |
| 1031339   | COG0304IQ    | gbs0336  | fabF      | Metabolism and transport        | Fatty acid and phospholipids                                      | 3-oxoacyl-[acyl-carrier-protein] synthase (EC 2.3.1.41)                                | 0.915 | 0.045 | 1.161 | 0.018 | 0.857  | 0.311 |
| 1030727   | COG0511I     | gbs0337  | accB      | Metabolism and transport        | Fatty acid and phospholipids                                      | Biotin carboxyl carrier protein of acetyl-CoA carboxylase (EC 6.4.1.2)                 | 0.914 | 0.015 | 1.143 | 0.036 | 0.773  | 0.001 |
| 1031344   | COG0764I     | gbs0338  |           | Metabolism and transport        | Fatty acid and phospholipids                                      | (3R)-hydroxyacyl-[acyl carrier protein] dehydratase (EC 4.2.1.60)                      | 0.910 | 0.011 | 1.122 | 0.057 | 0.837  | 0.328 |
| 1030589   | COG0439I     | gbs0339  | accC      | Metabolism and transport        | Fatty acid and phospholipids                                      | Biotin carboxylase (EC 6.3.4.14)                                                       | 0.902 | 0.019 | 1.164 | 0.029 | 0.891  | 0.145 |
| 1031347   | COG0777I     | gbs0340  | accA      | Metabolism and transport        | Fatty acid and phospholipids                                      | Acetyl-coenzyme A carboxylase carboxyl transferase subunit beta (EC 6.4.1.2)           | 0.868 | 0.048 | 1.289 | 0.010 | 0.786  | 0.061 |
| 1031345   | COG0825I     | gbs0341  | accD      | Metabolism and transport        | Fatty acid and phospholipids                                      | Acetyl-coenzyme A carboxylase carboxyl transferase subunit alpha (EC 6.4.1.2)          | 0.997 | 0.960 | 1.336 | 0.008 | 0.813  | 0.078 |
| 1030828   | -            | gbs0342  |           | Hypothetical                    |                                                                   | Hypothetical protein                                                                   | 1.199 | 0.009 | 1.936 | 0.002 | 0.977  | 0.839 |
| 1031352   | COG0172J     | gbs0343  | serS      | Cellular processes              | Translation, ribosomal structure and biogenesis                   | Seryl-tRNA synthetase (EC 6.1.1.11)                                                    | 0.800 | 0.005 | 0.592 | 0.000 | 0.769  | 0.054 |
| 1030671   | COG3274S     | gbs0344  |           | Hypothetical                    |                                                                   | Integral membrane protein                                                              | 1.247 | 0.030 | 1.114 | 0.157 | 0.638  | 0.039 |
| 1030667   | -            | gbs0345  | manO      | Hypothetical                    |                                                                   | Hypothetical cytosolic protein                                                         | 0.828 | 0.000 | 1.025 | 0.295 | 2.363  | 0.000 |
| 1030670   | -            | gbs0346  | manN      | Metabolism and transport        | Carbohydrates, organic alcohols, and acids                        | PTS system, mannose-specific IID component (EC 2.7.1.69)                               | 0.719 | 0.000 | 0.907 | 0.032 | 0.862  | 0.091 |
| 1030669   | -            | gbs0347  | manM      | Metabolism and transport        | Carbohydrates, organic alcohols, and acids                        | PTS system, mannose-specific IIC component (EC 2.7.1.69)                               | 0.709 | 0.005 | 0.860 | 0.073 | 1.169  | 0.215 |
| 1030489   | COG2893G     | gbs0348  | manL      | Metabolism and transport        | Carbohydrates, organic alcohols, and acids                        | PTS system, mannose-specific IIB component (EC 2.7.1.69)                               | 0.714 | 0.000 | 0.893 | 0.144 | 1.461  | 0.004 |
| 1030672   | COG0561R     | gbs0349  |           | Metabolism and transport        | Central intermediary metabolism                                   | Hydrolase (HAD superfamily)                                                            | 0.688 | 0.012 | 0.886 | 0.186 | 2.308  | 0.001 |
| 1031417   | -            | gbs0350  |           | Hypothetical                    |                                                                   | Hypothetical protein                                                                   | 1.168 | 0.008 | 0.873 | 0.055 | 0.650  | 0.030 |
| 1031366   | -            | gbs0351  |           | General function predicted only |                                                                   | Permease                                                                               | 2.875 | 0.000 | 1.362 | 0.004 | 1.571  | 0.003 |
| 1030742   | COG2252R     | gbs0352  |           | Metabolism and transport        | Purines, pyrimidines, nucleosides, and nucleotides                | Guanine-hypoxanthine permease                                                          | 1.767 | 0.000 | 0.694 | 0.001 | 2.491  | 0.001 |
| 1030741   | COG0802R     | gbs0353  |           | General function predicted only |                                                                   | ATP GTP hydrolase                                                                      | 1.150 | 0.025 | 1.158 | 0.082 | 2.198  | 0.007 |
| 1030754   | -            | gbs0354  |           | Metabolism and transport        | Central intermediary metabolism                                   | Acetyltransferase, GNAT family                                                         | 0.912 | 0.398 | 1.348 | 0.221 | 2.969  | 0.022 |
| 1031369   | COG1316K     | gbs0355  | lytR      | Cellular processes              | Transcription                                                     | Transcriptional regulator, LytR family                                                 | 0.980 | 0.234 | 1.273 | 0.005 | 3.463  | 0.001 |
| 1031370   | -            | gbs0356  |           | Hypothetical                    |                                                                   | Hypothetical protein                                                                   | 1.942 | 0.001 | 1.124 | 0.392 | 0.488  | 0.055 |
| 1031380   | COG0537FGR   | gbs0357  | hit       | Metabolism and transport        | Purines, pyrimidines, nucleosides, and nucleotides                | Adenosine 5'-monophosphoramidase                                                       | 1.552 | 0.000 | 1.020 | 0.838 | 0.635  | 0.006 |
| 1031374   | -            | gbs0358  |           | Hypothetical                    |                                                                   | Hypothetical protein                                                                   | 0.919 | 0.141 | 0.625 | 0.000 | 0.249  | 0.000 |
| 1030766   | COG1131V     | gbs0359  |           | Transport and binding proteins  | Unknown substrate                                                 | ABC-type transporter ATP-binding protein ecsA                                          | 1.046 | 0.437 | 0.905 | 0.179 | 0.876  | 0.282 |
| 1031402   | -            | gbs0360  |           | Transport and binding proteins  | Unknown substrate                                                 | Protein ecsB                                                                           | 1.110 | 0.251 | 0.830 | 0.025 | 0.677  | 0.157 |
| 1031674   | -            | gbs0364  |           | Hypothetical                    |                                                                   | Hypothetical protein                                                                   | 1.582 | 0.351 | 1.116 | 0.897 | 12.017 | 0.047 |
| 1031644   | -            | gbs0393  |           | Hypothetical                    |                                                                   | LPXTG Hypothetical protein                                                             | 1.140 | 0.017 | 2.983 | 0.000 | 3.644  | 0.000 |
| 1031640   | -            | gbs0402  |           | Hypothetical                    |                                                                   | TRSE PROTEIN                                                                           | 0.951 | 0.649 | 1.278 | 0.094 | 1.173  | 0.203 |
| 1031639</ |              |          |           |                                 |                                                                   |                                                                                        |       |       |       |       |        |       |

|         |           |         |         |                                      |                                                                                 |                                                                |                               |       |       |       |       |       |       |
|---------|-----------|---------|---------|--------------------------------------|---------------------------------------------------------------------------------|----------------------------------------------------------------|-------------------------------|-------|-------|-------|-------|-------|-------|
| 1031629 | -         | gbs0408 |         | Hypothetical                         |                                                                                 | Hypothetical protein                                           | 1.274                         | 0.009 | 1.473 | 0.066 | 0.939 | 0.638 |       |
| 1031627 | -         | gbs0409 |         | Hypothetical                         |                                                                                 | Hypothetical protein                                           | 1.229                         | 0.020 | 1.159 | 0.162 | 2.071 | 0.001 |       |
| 1031628 | -         | gbs0410 |         | Hypothetical                         |                                                                                 | Hypothetical protein                                           | 0.345                         | 0.029 | 0.771 | 0.495 | 0.222 | 0.173 |       |
| 1031625 | COG0510M  | gbs0411 |         | General function predicted only      |                                                                                 | Phosphotransferase enzyme family                               | 0.910                         | 0.016 | 0.924 | 0.002 | 0.979 | 0.880 |       |
| 1029806 | COG0220R  | gbs0412 |         | Cellular processes                   | Translation, ribosomal structure and biogenesis                                 | IRNA (m7)G46 methyltransferase (EC 2.1.1.33)                   | 1.059                         | 0.124 | 1.033 | 0.319 | 1.145 | 0.381 |       |
| 1031630 | COG0779S  | gbs0413 |         | Hypothetical                         |                                                                                 | Hypothetical cytosolic protein                                 | 0.930                         | 0.098 | 0.943 | 0.449 | 0.982 | 0.876 |       |
| 1029803 | COG0195K  | gbs0414 | nusA    | Cellular processes                   | Transcription                                                                   | N utilization substance protein A                              | 0.794                         | 0.027 | 1.040 | 0.116 | 1.324 | 0.024 |       |
| 1031624 | COG2740K  | gbs0415 |         | Hypothetical                         |                                                                                 | Hypothetical cytosolic protein                                 | 0.797                         | 0.026 | 1.042 | 0.303 | 1.215 | 0.053 |       |
| 1030800 | COG1358J  | gbs0416 |         | Cellular processes                   | Translation, ribosomal structure and biogenesis                                 | LSU ribosomal protein L7AE                                     | 0.889                         | 0.043 | 1.032 | 0.402 | 1.317 | 0.029 |       |
| 1031626 | COG0532J  | gbs0417 | infB    | Cellular processes                   | Translation, ribosomal structure and biogenesis                                 | Bacterial Protein Translation Initiation Factor 2 (IF-2)       | 0.726                         | 0.046 | 0.961 | 0.635 | 1.171 | 0.403 |       |
| 1029800 | COG0858J  | gbs0418 | rfIA    | Cellular processes                   | Translation, ribosomal structure and biogenesis                                 | Ribosome-binding factor A                                      | 0.820                         | 0.003 | 0.960 | 0.026 | 1.061 | 0.401 |       |
| 1031622 | COG0657I  | gbs0419 |         | Metabolism and transport             | Fatty acid and phospholipids                                                    | Esterase (EC 3.1.1.-)                                          | 1.441                         | 0.001 | 0.797 | 0.023 | 0.385 | 0.001 |       |
| 1031825 | COG3682K  | gbs0420 | copY    | Cellular processes                   | Transcription                                                                   | CopAB ATPases metal-fist type repressor                        | 1.455                         | 0.038 | 1.132 | 0.314 | 1.596 | 0.105 |       |
| 1029796 | COG2217P  | gbs0421 | copA    | Metabolism and transport             | Inorganic ion transport and metabolism                                          | Copper-exporting ATPase (EC 3.6.3.4)                           | 1.377                         | 0.015 | 1.043 | 0.594 | 1.443 | 0.019 |       |
| 1029801 | COG2608P  | gbs0422 | copZ    | Metabolism and transport             | Inorganic ion transport and metabolism                                          | Copper chaperone copZ                                          | 1.800                         | 0.008 | 1.299 | 0.119 | 1.144 | 0.546 |       |
| 1030027 | COG2860S  | gbs0423 |         | Hypothetical                         |                                                                                 | Hypothetical membrane spanning protein                         | 2.074                         | 0.008 | 1.559 | 0.000 | 1.313 | 0.115 |       |
| 1031623 | COG0561R  | gbs0424 |         | Metabolism and transport             | Central intermediary metabolism                                                 | Hydrolase (HAD superfamily)                                    | 1.881                         | 0.006 | 1.484 | 0.021 | 1.657 | 0.000 |       |
| 1030017 | COG0258L  | COG     | gbs0425 | polA                                 | Cellular processes                                                              | DNA replication, recombination and repair                      | DNA polymerase I (EC 2.7.7.7) | 1.041 | 0.243 | 1.108 | 0.174 | 1.426 | 0.066 |
| 1031621 | COG1832R  | gbs0426 |         | General function predicted only      |                                                                                 | CoA binding protein                                            | 1.171                         | 0.004 | 1.185 | 0.100 | 1.590 | 0.002 |       |
| 1031826 | COG0735P  | gbs0427 | perR    | Metabolism and transport             | Inorganic ion transport and metabolism                                          | Oxidative stress response regulator BosR                       | 1.157                         | 0.007 | 1.218 | 0.016 | 1.139 | 0.148 |       |
| 1029793 | -         | gbs0428 |         | Transport and binding proteins       | Unknown substrate                                                               | LPXTG Transporter                                              | 1.098                         | 0.433 | 0.900 | 0.557 | 0.388 | 0.005 |       |
| 1029791 | COG0745TK | gbs0429 |         | Cellular processes                   | Signal transduction                                                             | Two-component response regulator SaeR                          | 0.856                         | 0.005 | 0.709 | 0.004 | 0.947 | 0.615 |       |
| 1031620 | COG0642T  | gbs0430 |         | Cellular processes                   | Signal transduction                                                             | Sensory transduction protein kinase SaeS (EC 2.7.3.-)          | 0.654                         | 0.001 | 0.690 | 0.015 | 1.010 | 0.868 |       |
| 1029798 | COG5523S  | gbs0431 |         | Hypothetical                         |                                                                                 | Integral membrane protein                                      | 1.196                         | 0.035 | 1.219 | 0.039 | 3.990 | 0.001 |       |
| 1031618 | COG0343J  | gbs0432 | tgt     | Cellular processes                   | Translation, ribosomal structure and biogenesis                                 | Queuine tRNA-ribosyltransferase (EC 2.4.2.29)                  | 0.482                         | 0.001 | 0.792 | 0.002 | 0.816 | 0.076 |       |
| 1030136 | COG4357S  | gbs0433 |         | Hypothetical                         |                                                                                 | Zinc finger protein                                            | 0.850                         | 0.020 | 1.029 | 0.687 | 1.377 | 0.269 |       |
| 1031619 | COG1268R  | gbs0434 |         | Metabolism and transport             | Cofactors, prosthetic groups, and carriers                                      | BioY protein                                                   | 0.631                         | 0.023 | 0.851 | 0.242 | 0.431 | 0.026 |       |
| 1031614 | COG1234R  | gbs0435 |         | Cellular processes                   | Toxin production and resistance                                                 | Metal-dependent hydrolase (EC 3.-.-)                           | 2.141                         | 0.006 | 1.240 | 0.053 | 1.247 | 0.121 |       |
| 1031613 | COG0590FJ | gbs0436 |         | Cellular processes                   | Translation, ribosomal structure and biogenesis                                 | IRNA-specific adenosine deaminase (EC 3.5.4.-)                 | 1.632                         | 0.001 | 1.091 | 0.255 | 1.714 | 0.003 |       |
| 1031617 | COG0166G  | gbs0437 | pgi     | Metabolism and transport             | Carbohydrates, organic alcohols, and acids                                      | Glucose-6-phosphate isomerase (EC 5.3.1.9)                     | 1.050                         | 0.070 | 0.858 | 0.015 | 0.646 | 0.002 |       |
| 1031610 | -         | gbs0438 |         | Metabolism and transport             | Amino acids, peptides, aminosugars and amines                                   | 5-formyltetrahydrofolate cyclo-ligase (EC 6.3.3.2)             | 1.246                         | 0.033 | 1.563 | 0.001 | 0.924 | 0.265 |       |
| 1031616 | COG0705R  | gbs0439 |         | General function predicted only      |                                                                                 | Integral membrane protein (Rhomboid family)                    | 1.352                         | 0.041 | 1.779 | 0.000 | 0.604 | 0.004 |       |
| 1031615 | COG1744R  | gbs0440 |         | Metabolism and transport             | Purines, pyrimidines, nucleosides, and nucleotides                              | Nucleoside-binding protein                                     | 1.359                         | 0.011 | 1.872 | 0.005 | 0.631 | 0.072 |       |
| 1031606 | COG1210M  | gbs0441 | hasC    | Cell Envelope                        | Biosynthesis and degradation of surface polysaccharides and lipopolysaccharides | UTP-glucose-1-phosphate uridylyltransferase (EC 2.7.7.9)       | 1.284                         | 0.012 | 1.120 | 0.065 | 7.956 | 0.000 |       |
| 1031612 | COG0240C  | gbs0442 | gpsA    | Metabolism and transport             | Energy production and conversion                                                | Glycerol-3-phosphate dehydrogenase [NAD(P)+] (EC 1.1.1.94)     | 1.634                         | 0.023 | 1.276 | 0.004 | 2.047 | 0.004 |       |
| 1031609 | COG0594J  | gbs0443 | mpA     | Cellular processes                   | Transcription                                                                   | Ribonuclease P protein component (EC 3.1.26.5)                 | 0.942                         | 0.026 | 0.751 | 0.003 | 1.131 | 0.618 |       |
| 1031611 | COG0706U  | gbs0444 |         | Cell Envelope                        | Other                                                                           | 60 kDa inner membrane protein YIDC                             | 0.771                         | 0.002 | 0.755 | 0.008 | 1.777 | 0.004 |       |
| 1031607 | COG1847R  | gbs0445 |         | General function predicted only      |                                                                                 | Jag protein                                                    | 0.791                         | 0.010 | 0.821 | 0.003 | 1.555 | 0.084 |       |
| 1031602 | COG3557J  | gbs0446 |         | Cellular processes                   | Translation, ribosomal structure and biogenesis                                 | Hypothetical cytosolic protein                                 | 1.225                         | 0.005 | 1.044 | 0.429 | 1.622 | 0.046 |       |
| 1031599 | COG2137R  | gbs0447 | recX    | Cellular processes                   | DNA replication, recombination, and repair                                      | Regulatory protein recX                                        | 0.784                         | 0.007 | 0.769 | 0.063 | 1.050 | 0.831 |       |
| 1031600 | COG2265J  | gbs0448 |         | Cellular processes                   | Translation, ribosomal structure and biogenesis                                 | IRNA (Uracil-5--methyltransferase (EC 2.1.1.35)                | 0.979                         | 0.562 | 0.849 | 0.075 | 4.387 | 0.000 |       |
| 1029792 | COG2820F  | gbs0449 |         | Metabolism and transport             | Purines, pyrimidines, nucleosides, and nucleotides                              | Phosphorylase, Pnp Udp family                                  | 0.953                         | 0.347 | 0.625 | 0.011 | 3.841 | 0.000 |       |
| 1031595 | COG2153R  | gbs0450 |         | Metabolism and transport             | Central intermediary metabolism                                                 | Acetyltransferase, GNAT family                                 | 0.959                         | 0.265 | 0.671 | 0.010 | 4.792 | 0.000 |       |
| 1031603 | COG1404O  | gbs0451 | cspA    | Cellular processes                   | Posttranslational modification, protein turnover, chaperones                    | LPXTS CSA peptidase precursor (EC 3.4.21.-)                    | 2.725                         | 0.000 | 2.448 | 0.001 | 1.169 | 0.720 |       |
| 1031598 | COG0463M  | gbs0452 |         | Cell Envelope                        | Biosynthesis and degradation of murein sacculus and peptidoglycan               | alpha-L-Rha alpha-1,3-L-rhamnosyltransferase (EC 2.4.1.-)      | 1.187                         | 0.025 | 0.484 | 0.000 | 0.709 | 0.005 |       |
| 1030121 | COG0208F  | gbs0453 | nrdF.1  | Metabolism and transport             | Purines, pyrimidines, nucleosides, and nucleotides                              | Ribonucleoside-diphosphate reductase beta chain (EC 1.17.4.1)  | 1.022                         | 0.441 | 1.726 | 0.001 | 1.161 | 0.471 |       |
| 1031597 | COG1780F  | gbs0454 | nrdI    | Metabolism and transport             | Purines, pyrimidines, nucleosides, and nucleotides                              | NrdI protein                                                   | 1.128                         | 0.142 | 2.041 | 0.000 | 1.359 | 0.113 |       |
| 1031593 | COG0209F  | gbs0455 | nrdE.1  | Metabolism and transport             | Purines, pyrimidines, nucleosides, and nucleotides                              | Ribonucleoside-diphosphate reductase alpha chain (EC 1.17.4.1) | 0.958                         | 0.612 | 1.821 | 0.002 | 2.289 | 0.017 |       |
| 1031596 | -         | gbs0456 | lrrG    | Hypothetical                         |                                                                                 | LPXTS Cell surface protein                                     | 0.713                         | 0.038 | 1.708 | 0.004 | 1.537 | 0.010 |       |
| 1031594 | COG3576R  | gbs0457 |         | Hypothetical                         |                                                                                 | Hypothetical cytosolic protein                                 | 0.678                         | 0.024 | 1.803 | 0.001 | 1.725 | 0.009 |       |
| 1031588 | COG3708S  | gbs0458 |         | Cellular processes                   | Transcription                                                                   | Transcriptional regulator, AraC family                         | 1.159                         | 0.057 | 0.508 | 0.004 | 0.707 | 0.035 |       |
| 1031592 | COG4367S  | gbs0459 |         | Hypothetical                         |                                                                                 | Hypothetical protein                                           | 1.213                         | 0.004 | 0.605 | 0.001 | 0.716 | 0.115 |       |
| 1031590 | COG0599S  | gbs0460 |         | Metabolism and transport             | Central intermediary metabolism                                                 | 4-carboxymuconolactone decarboxylase (EC 4.1.1.144)            | 1.109                         | 0.257 | 0.456 | 0.001 | 0.715 | 0.021 |       |
| 1031583 | COG1917S  | gbs0461 |         | Hypothetical                         |                                                                                 | Hypothetical cytosolic protein                                 | 1.149                         | 0.094 | 0.488 | 0.002 | 0.675 | 0.077 |       |
| 1031591 | COG0789K  | gbs0462 |         | Cellular processes                   | Transcription                                                                   | Transcriptional regulator, MerR family                         | 1.020                         | 0.849 | 0.458 | 0.002 | 0.701 | 0.008 |       |
| 1031582 | COG1063ER | gbs0464 |         | Metabolism and transport             | Carbohydrates, organic alcohols, and acids                                      | Sorbitol dehydrogenase (EC 1.1.1.14)                           | 0.925                         | 0.378 | 0.513 | 0.001 | 0.735 | 0.209 |       |
| 1031584 | COG0656R  | gbs0466 |         | Metabolism and transport             | Central intermediary metabolism                                                 | Aldose reductase (EC 1.1.1.21)                                 | 1.087                         | 0.104 | 0.497 | 0.001 | 0.726 | 0.071 |       |
| 1031586 | COG1230P  | gbs0467 | czcD    | Metabolism and transport             | Inorganic ion transport and metabolism                                          | Cobalt-zinc-cadmium resistance protein czcD                    | 2.034                         | 0.002 | 0.932 | 0.147 | 1.127 | 0.246 |       |
| 1031579 | COG1309K  | gbs0468 |         | Cellular processes                   | Transcription                                                                   | Transcriptional regulator, TetR family                         | 1.055                         | 0.240 | 1.267 | 0.009 | 0.972 | 0.866 |       |
| 1031581 | COG4753T  | gbs0469 |         | Cellular processes                   | Transcription                                                                   | Transcriptional regulator, AraC family                         | 0.999                         | 0.969 | 0.580 | 0.009 | 1.801 | 0.145 |       |
| 1031585 | -         | gbs0470 | alp2    | Hypothetical                         |                                                                                 | LPXTG Cell surface protein                                     | 0.916                         | 0.257 | 0.764 | 0.003 | 1.720 | 0.003 |       |
| 1031575 | COG3077L  | gbs0471 |         | Cellular processes                   | DNA replication, recombination and repair                                       | DNA-damage-inducible protein J                                 | 1.090                         | 0.115 | 1.251 | 0.002 | 0.582 | 0.003 |       |
| 1031578 | -         | gbs0472 |         | Hypothetical                         |                                                                                 | Hypothetical cytosolic protein                                 | 1.044                         | 0.045 | 1.263 | 0.007 | 0.580 | 0.030 |       |
| 1031577 | -         | gbs0473 |         | Hypothetical                         |                                                                                 | Hypothetical exported protein                                  | 1.148                         | 0.121 | 1.513 | 0.003 | 0.482 | 0.042 |       |
| 1031567 | -         | gbs0474 |         | Hypothetical                         |                                                                                 | Hypothetical cytosolic protein                                 | 1.736                         | 0.001 | 1.838 | 0.018 | 1.167 | 0.727 |       |
| 1031573 | COG1396K  | gbs0475 |         | Cellular processes                   | Transcription                                                                   | Transcriptional regulator, Cro CI family                       | 1.209                         | 0.079 | 1.988 | 0.001 | 0.325 | 0.133 |       |
| 1031572 | -         | gbs0476 |         | Hypothetical                         |                                                                                 | Membrane protein                                               | 0.602                         | 0.042 | 1.057 | 0.572 | 0.377 | 0.120 |       |
| 1031571 | -         | gbs0477 |         | Hypothetical                         |                                                                                 | Hypothetical exported protein                                  | 0.781                         | 0.064 | 0.979 | 0.934 | 0.384 | 0.067 |       |
| 1031580 | -         | gbs0478 |         | Hypothetical                         |                                                                                 | Hypothetical exported protein                                  | 1.150                         | 0.358 | 0.949 | 0.906 | 0.385 | 0.117 |       |
| 1031568 | -         | gbs0479 |         | Hypothetical                         |                                                                                 | LPXTG Cell surface protein                                     | 0.481                         | 0.050 | 0.316 | 0.036 | 0.197 | 0.004 |       |
| 1031566 | -         | gbs0480 |         | Hypothetical                         |                                                                                 | Hypothetical membrane spanning protein                         | 0.912                         | 0.397 | 0.752 | 0.008 | 0.844 | 0.255 |       |
| 1031576 | -         | gbs0481 |         | Hypothetical                         |                                                                                 | Hypothetical protein                                           | 0.249                         | 0.002 | 0.552 | 0.055 | 0.829 | 0.419 |       |
| 1031561 | -         | gbs0482 |         | Mobile and extrachromosomal elements |                                                                                 | DNA integration recombination inversion protein                | 0.885                         | 0.255 | 0.949 | 0.013 | 2.450 | 0.008 |       |
| 1031558 | COG1917S  | gbs0484 |         | General function predicted only      |                                                                                 | Putative acetate kinase                                        | 1.093                         | 0.241 | 0.637 | 0.000 | 1.077 | 0.479 |       |
| 1031569 | COG1917S  | gbs0485 |         | Hypothetical                         |                                                                                 | Hypothetical cytosolic protein                                 | 1.284                         | 0.009 | 0.518 | 0.001 | 0.994 | 0.980 |       |
| 1031565 | COG0500QR | gbs0486 |         | Metabolism and transport             | Secondary metabolites                                                           | SAM-dependent methyltransferase                                | 1.318                         | 0.005 | 0.489 | 0.001 | 0.779 | 0.101 |       |
| 1031557 | -         | gbs0487 |         | Hypothetical                         |                                                                                 | Hypothetical protein                                           | 0.861                         | 0.071 | 0.928 | 0.242 | 1.020 | 0.803 |       |
| 1031560 | -         | gbs0488 |         | Hypothetical                         |                                                                                 | Hypothetical cytosolic protein                                 | 0.728                         | 0.011 | 0.854 | 0.004 | 0.861 | 0.241 |       |
| 1031551 | COG1670J  | gbs0489 |         | Cellular processes                   | Translation, ribosomal structure and biogenesis                                 | Ribosomal-protein-serine acetyltransferase (EC 2.3.1.-)        | 0.628                         | 0.006 | 0.692 | 0.013 | 2.953 | 0.077 |       |
| 1031559 | COG1670J  | gbs0490 |         | Cellular processes                   | Translation, ribosomal structure and biogenesis                                 | Ribosomal-protein-serine acetyltransferase (EC 2.3.1.-)        | 0.579                         | 0.002 | 0.748 | 0.001 | 2.409 | 0.006 |       |
| 1031554 | COG0703E  | gbs0491 |         | Hypothetical                         |                                                                                 | Hypothetical protein                                           | 0.644                         | 0.005 | 0.763 | 0.002 | 2.316 | 0.008 |       |
| 1031555 | COG0525J  | gbs0492 | valS    | Cellular processes                   | Translation, ribosomal structure and biogenesis                                 | Valyl-IRNA synthetase (EC 6.1.1.9)                             | 0.571                         | 0.000 | 0.715 | 0.005 | 1.672 | 0.028 |       |
| 1031552 | -         | gbs0493 |         | Hypothetical                         |                                                                                 | Hypothetical protein                                           | 1.395                         | 0.009 | 0.456 | 0.000 | 1.790 | 0.003 |       |
| 1031550 | COG0673R  | gbs0494 |         | Metabolism and transport             | Central intermediary metabolism                                                 | NAD-dependent oxidoreductase                                   | 1.367                         | 0.010 | 1.324 | 0.003 | 2.254 | 0.007 |       |
| 1031556 | COG0598P  | gbs0495 |         | Metabolism and transport             | Inorganic ion transport and metabolism                                          | Magnesium and cobalt transport protein corA                    | 2.442                         | 0.016 | 1.463 | 0.002 | 1.827 | 0.004 |       |
| 1031548 | COG2315S  | gbs0496 |         | Hypothetical                         |                                                                                 | Hypothetical cytosolic protein                                 | 0.763                         | 0.179 | 0.784 | 0.250 | 1.156 | 0.355 |       |
| 1031547 | COG2502E  | gbs0497 | asnA    | Metabolism and transport             | Amino acids, peptides, aminosugars and amines                                   | Aspartate-ammonia ligase (EC 6.3.1.1)                          | 1.214                         | 0.010 | 0.666 | 0.026 | 1.166 | 0.775 |       |
| 1031540 | -         | gbs0498 |         | Metabolism and transport             | Energy production and conversion                                                | Thioredoxin                                                    | 2.511                         | 0.000 | 1.686 | 0.000 | 0.722 | 0.052 |       |
| 1031553 | COG0742L  | gbs0499 |         | Cellular processes                   | DNA replication, recombination and repair                                       | Methyltransferase (EC 2.1.1.-)                                 | 0.954                         | 0.393 | 0.854 | 0.013 | 1.174 | 0.386 |       |
| 1031539 | -         | gbs0500 |         | Hypothetical                         |                                                                                 | Hypothetical protein                                           | 1.224                         | 0.067 | 0.843 | 0.007 | 0.991 | 0.918 |       |
| 1031546 | COG0669H  | gbs0501 |         | Metabolism and transport             | Cofactors, prosthetic groups, and carriers                                      | Phosphopantetheine adenylyltransferase (EC 2.7.7.3)            | 0.943                         | 0.158 | 0.901 | 0.040 |       |       |       |

|         |           |         |         |                                      |                                                                   |                                                                                            |       |       |       |       |       |       |
|---------|-----------|---------|---------|--------------------------------------|-------------------------------------------------------------------|--------------------------------------------------------------------------------------------|-------|-------|-------|-------|-------|-------|
| 1031532 | COG0737F  | gbs0503 |         | Metabolism and transport             | Purines, pyrimidines, nucleosides, and nucleotides                | 5-nucleotidase (EC 3.1.3.5)                                                                | 1.328 | 0.023 | 1.552 | 0.037 | 0.538 | 0.038 |
| 1031529 | -         | gbs0504 |         | Hypothetical                         |                                                                   | Hypothetical cytosolic protein                                                             | 0.834 | 0.000 | 0.889 | 0.006 | 0.689 | 0.002 |
| 1031542 | COG0820R  | gbs0505 |         | General function predicted only      |                                                                   | Radical SAM family enzyme                                                                  | 0.777 | 0.000 | 0.904 | 0.284 | 0.834 | 0.071 |
| 1031537 | COG4767V  | gbs0506 |         | Hypothetical                         |                                                                   | VanZ family protein                                                                        | 0.943 | 0.130 | 0.978 | 0.700 | 0.595 | 0.019 |
| 1031534 | COG1132V  | gbs0507 |         | Cellular processes                   | Toxin production and resistance                                   | Multidrug resistance ABC transporter ATP-binding and permease protein                      | 0.681 | 0.008 | 0.865 | 0.075 | 0.360 | 0.010 |
| 1031526 | COG1132V  | gbs0508 |         | Cellular processes                   | Toxin production and resistance                                   | Multidrug protein lipid ABC transporter family, ATP-binding and permease protein           | 0.541 | 0.000 | 0.822 | 0.092 | 0.403 | 0.007 |
| 1031538 | COG0512EH | gbs0509 | trpG    | Metabolism and transport             | Cofactors, prosthetic groups, and carriers                        | Anthranilate synthase component II (EC 4.1.3.27) Para-aminobenzoate synthase glutamine ar  | 1.052 | 0.426 | 0.917 | 0.398 | 0.748 | 0.194 |
| 1031533 | COG1268R  | gbs0510 |         | Metabolism and transport             | Cofactors, prosthetic groups, and carriers                        | BioY protein                                                                               | 0.520 | 0.033 | 0.900 | 0.923 | 0.643 | 0.346 |
| 1031523 | COG0502H  | gbs0511 |         | Metabolism and transport             | Cofactors, prosthetic groups, and carriers                        | Biotin synthase (EC 2.8.1.6)                                                               | 0.563 | 0.010 | 1.014 | 0.939 | 0.476 | 0.205 |
| 1031531 | -         | gbs0512 |         | Hypothetical                         |                                                                   | Hypothetical protein                                                                       | 1.005 | 0.944 | 1.243 | 0.385 | 0.556 | 0.610 |
| 1031527 | COG0318IQ | gbs0514 |         | Metabolism and transport             | Fatty acid and phospholipids                                      | Long-chain-fatty-acid-CoA ligase (EC 6.2.1.3)                                              | 0.872 | 0.204 | 1.391 | 0.086 | 0.640 | 0.465 |
| 1031525 | COG0177L  | gbs0515 | nth     | Cellular processes                   | DNA replication, recombination and repair                         | Endonuclease III (EC 4.2.99.18)                                                            | 1.460 | 0.000 | 0.978 | 0.503 | 1.457 | 0.077 |
| 1031520 | -         | gbs0516 |         | General function predicted only      |                                                                   | Type 4 prelin-like proteins leader peptide processing enzyme                               | 0.452 | 0.017 | 0.839 | 0.535 | 0.320 | 0.504 |
| 1031528 | -         | gbs0517 |         | Hypothetical                         |                                                                   | Hypothetical cytosolic protein                                                             | 0.862 | 0.013 | 0.878 | 0.047 | 0.967 | 0.772 |
| 1031524 | COG1940KG | gbs0518 | glcK    | Metabolism and transport             | Carbohydrates, organic alcohols, and acids                        | Glucokinase (EC 2.7.1.2)                                                                   | 0.778 | 0.002 | 0.841 | 0.012 | 0.953 | 0.406 |
| 1031517 | COG0607P  | gbs0519 |         | Metabolism and transport             | Inorganic ion transport and metabolism                            | Rhodanese-related sulfurtransferases                                                       | 0.871 | 0.016 | 0.841 | 0.023 | 0.909 | 0.421 |
| 1031521 | COG1217T  | gbs0520 | typA    | Cellular processes                   | Signal transduction                                               | GTP-binding protein TypA BiPa                                                              | 0.887 | 0.119 | 1.426 | 0.003 | 1.759 | 0.033 |
| 1031519 | -         | gbs0521 |         | Hypothetical                         |                                                                   | Hypothetical membrane spanning protein                                                     | 1.062 | 0.369 | 1.549 | 0.000 | 1.903 | 0.003 |
| 1031514 | COG0771M  | gbs0522 | murD    | Cell Envelope                        | Biosynthesis and degradation of murein sacculus and peptidoglycan | UDP-N-acetylmuramoylalanine-D-glutamate ligase (EC 6.3.2.9)                                | 0.842 | 0.002 | 1.013 | 0.748 | 1.365 | 0.095 |
| 1031516 | COG0707M  | gbs0523 | murG    | Cell Envelope                        | Biosynthesis and degradation of murein sacculus and peptidoglycan | UDP-N-acetylglucosamine-N-acetylmuramyl-(pentapeptide) pyrophosphoryl-undecaprenol N-a     | 0.922 | 0.730 | 0.940 | 0.353 | 1.327 | 0.018 |
| 1031512 | COG1589M  | gbs0524 | divIB   | Cellular processes                   | Cell division                                                     | Cell-division initiation protein DivIB                                                     | 0.819 | 0.000 | 0.950 | 0.066 | 1.242 | 0.085 |
| 1031518 | COG0849D  | gbs0525 | ftsA    | Cellular processes                   | Cell division                                                     | Cell division protein ftsA                                                                 | 0.899 | 0.003 | 1.074 | 0.033 | 1.815 | 0.023 |
| 1031509 | COG0206D  | gbs0526 | ftsZ    | Cellular processes                   | Cell division                                                     | Cell division protein ftsZ                                                                 | 0.932 | 0.088 | 1.053 | 0.017 | 1.779 | 0.004 |
| 1031508 | COG0325R  | gbs0527 |         | General function predicted only      |                                                                   | Pyridoxal-5-phosphate family protein                                                       | 0.849 | 0.001 | 1.002 | 0.971 | 2.028 | 0.008 |
| 1031513 | COG1799S  | gbs0528 |         | Hypothetical                         |                                                                   | Hypothetical cytosolic protein                                                             | 0.892 | 0.079 | 1.027 | 0.409 | 2.379 | 0.000 |
| 1031506 | -         | gbs0529 |         | Hypothetical                         |                                                                   | Integral membrane protein                                                                  | 0.926 | 0.002 | 1.082 | 0.203 | 1.998 | 0.000 |
| 1031510 | COG2302S  | gbs0530 |         | General function predicted only      |                                                                   | RNA binding protein                                                                        | 0.989 | 0.663 | 1.151 | 0.053 | 1.837 | 0.000 |
| 1031511 | COG3599D  | gbs0531 | divIVAS | Cellular processes                   | Cell division                                                     | Cell division initiation protein DivIVA                                                    | 1.075 | 0.052 | 1.186 | 0.002 | 1.519 | 0.000 |
| 1031507 | COG0060J  | gbs0532 | ileS    | Cellular processes                   | Translation, ribosomal structure and biogenesis                   | Isoleucyl-tRNA synthetase (EC 6.1.1.5)                                                     | 0.804 | 0.000 | 0.880 | 0.031 | 3.649 | 0.000 |
| 1031505 | -         | gbs0533 |         | Hypothetical                         |                                                                   | Hypothetical cytosolic protein                                                             | 1.651 | 0.002 | 0.944 | 0.610 | 1.349 | 0.083 |
| 1031515 | COG0494LR | gbs0534 | mutT    | General function predicted only      |                                                                   | Mutator mutT protein (7,8-dihydro-8-oxoguanine-triphosphatase) (EC 3.6.1.-)                | 1.090 | 0.491 | 0.646 | 0.023 | 0.220 | 0.001 |
| 1031503 | COG0542O  | gbs0535 | clpE    | Cellular processes                   | Posttranslational modification, protein turnover, chaperones      | ATP-dependent endopeptidase clp ATP-binding subunit clpE                                   | 2.345 | 0.001 | 1.051 | 0.718 | 0.740 | 0.143 |
| 1031504 | -         | gbs0536 |         | Hypothetical                         |                                                                   | Hypothetical cytosolic protein                                                             | 1.182 | 0.230 | 1.067 | 0.466 | 1.150 | 0.449 |
| 1031502 | COG0765E  | gbs0537 | artQ    | Metabolism and transport             | Amino acids, peptides, aminosugars and amines                     | Arginine transport system permease protein artQ                                            | 1.594 | 0.013 | 0.874 | 0.246 | 1.953 | 0.036 |
| 1031497 | COG1126E  | gbs0538 | artP    | Metabolism and transport             | Amino acids, peptides, aminosugars and amines                     | Arginine transport ATP-binding protein artP                                                | 1.392 | 0.000 | 0.864 | 0.048 | 1.826 | 0.063 |
| 1031498 | COG1109G  | gbs0539 |         | Metabolism and transport             | Carbohydrates, organic alcohols, and acids                        | Phosphoglucosaminase (EC 5.4.2.2) Phosphomannomutase (EC 5.4.2.8)                          | 0.613 | 0.004 | 0.841 | 0.143 | 1.005 | 0.933 |
| 1031499 | COG0190H  | gbs0540 | folD    | Metabolism and transport             | Cofactors, prosthetic groups, and carriers                        | Methylenetetrahydrofolate dehydrogenase (NADP+) (EC 1.5.1.5) Methylenetetrahydrofolate cyc | 1.519 | 0.047 | 0.966 | 0.968 | 0.723 | 0.182 |
| 1031492 | COG0063G  | gbs0541 |         | Metabolism and transport             | Carbohydrates, organic alcohols, and acids                        | Sugar kinase                                                                               | 1.552 | 0.051 | 0.962 | 0.764 | 1.067 | 0.800 |
| 1031490 | COG1570L  | gbs0542 |         | Cellular processes                   | DNA replication, recombination and repair                         | Exodeoxyribonuclease VII large subunit (EC 3.1.11.6)                                       | 0.996 | 0.761 | 0.908 | 0.187 | 0.811 | 0.015 |
| 1031496 | COG1722L  | gbs0543 | xseB    | Cellular processes                   | DNA replication, recombination and repair                         | Exodeoxyribonuclease VII small subunit (EC 3.1.11.6)                                       | 1.094 | 0.030 | 0.988 | 0.753 | 0.799 | 0.073 |
| 1031500 | COG0142H  | gbs0544 | fps     | Metabolism and transport             | Cofactors, prosthetic groups, and carriers                        | Dimethylallyltransferase (EC 2.5.1.1) Geranyltransferase (EC 2.5.1.10)                     | 1.140 | 0.025 | 1.013 | 0.838 | 0.938 | 0.213 |
| 1031493 | COG1189J  | gbs0545 | hemA    | Cellular processes                   | Translation, ribosomal structure and biogenesis                   | Hemolysin                                                                                  | 0.987 | 0.756 | 1.031 | 0.321 | 0.791 | 0.102 |
| 1031491 | COG1438K  | gbs0546 | argR1   | Cellular processes                   | Transcription                                                     | Arginine repressor, argR                                                                   | 1.202 | 0.104 | 1.117 | 0.148 | 0.631 | 0.078 |
| 1031484 | COG0497L  | gbs0547 | recN    | Cellular processes                   | DNA replication, recombination and repair                         | DNA repair protein recN                                                                    | 0.979 | 0.456 | 1.079 | 0.034 | 0.763 | 0.001 |
| 1031489 | COG1307S  | gbs0548 |         | Metabolism and transport             | Fatty acid and phospholipids                                      | Fatty acid-binding protein, DegV family                                                    | 0.904 | 0.007 | 1.012 | 0.895 | 0.879 | 0.030 |
| 1031488 | COG2755E  | gbs0549 |         | Metabolism and transport             | Fatty acid and phospholipids                                      | Lipase Acylhydrolase with GDSL-like motif                                                  | 1.148 | 0.097 | 1.040 | 0.371 | 0.611 | 0.068 |
| 1031479 | -         | gbs0550 |         | Hypothetical                         |                                                                   | Hypothetical membrane associated protein                                                   | 1.114 | 0.094 | 1.120 | 0.106 | 0.516 | 0.091 |
| 1031763 | -         | gbs0551 |         | Cellular processes                   | DNA replication, recombination and repair                         | DNA-binding protein HU                                                                     | 1.041 | 0.534 | 1.159 | 0.002 | 0.804 | 0.209 |
| 1031782 | -         | gbs0552 |         | Hypothetical                         |                                                                   | Hypothetical protein                                                                       | 1.970 | 0.014 | 1.002 | 0.977 | 0.937 | 0.744 |
| 1031236 | COG0167F  | gbs0553 | pyrD    | Metabolism and transport             | Purines, pyrimidines, nucleosides, and nucleotides                | Dihydroorotate dehydrogenase (EC 1.3.3.1)                                                  | 0.819 | 0.072 | 0.195 | 0.000 | 0.457 | 0.010 |
| 1031697 | COG2348V  | gbs0554 |         | Cellular processes                   | Toxin production and resistance                                   | Factor essential for expression of methicillin resistance                                  | 1.202 | 0.031 | 1.364 | 0.002 | 0.341 | 0.012 |
| 1031713 | COG2348V  | gbs0555 | murM    | Cell Envelope                        | Biosynthesis and degradation of murein sacculus and peptidoglycan | UDP-N-acetylmuramoyl(pentapeptide)-lysine N(6)-alanyltransferase (EC 2.3.2.10) UDP-N-acet  | 1.274 | 0.012 | 1.397 | 0.002 | 0.362 | 0.004 |
| 1030787 | COG2348V  | gbs0556 |         | Cell Envelope                        | Biosynthesis and degradation of murein sacculus and peptidoglycan | UDP-N-acetylmuramoyl(pentapeptide)-lysine N(6)-alanyltransferase (EC 2.3.2.10) UDP-N-acet  | 1.169 | 0.054 | 1.325 | 0.003 | 0.370 | 0.002 |
| 1031795 | COG0561R  | gbs0557 |         | Metabolism and transport             | Central intermediary metabolism                                   | Hydrolase (HAD superfamily)                                                                | 1.090 | 0.159 | 1.258 | 0.024 | 0.483 | 0.001 |
| 1030920 | COG1078R  | gbs0558 |         | General function predicted only      |                                                                   | dGTP triphosphohydrolase                                                                   | 0.968 | 0.237 | 1.099 | 0.085 | 0.382 | 0.000 |
| 1031474 | -         | gbs0559 |         | Hypothetical                         |                                                                   | Hypothetical cytosolic protein                                                             | 0.846 | 0.032 | 0.853 | 0.004 | 0.738 | 0.011 |
| 1030837 | COG0474P  | gbs0560 | pacL    | Metabolism and transport             | Inorganic ion transport and metabolism                            | Calcium-transporting ATPase (EC 3.6.3.8)                                                   | 1.645 | 0.001 | 1.410 | 0.013 | 1.736 | 0.012 |
| 1031766 | COG1409R  | gbs0561 |         | Metabolism and transport             | Central intermediary metabolism                                   | Phosphoesterase                                                                            | 1.744 | 0.003 | 1.263 | 0.041 | 2.580 | 0.003 |
| 1031434 | -         | gbs0562 |         | Metabolism and transport             | Carbohydrates, organic alcohols, and acids                        | Fructose-1,6-bisphosphatase (EC 3.1.3.11)                                                  | 1.632 | 0.112 | 1.594 | 0.034 | 0.748 | 0.215 |
| 1031105 | COG1600C  | gbs0563 |         | Metabolism and transport             | Energy production and conversion                                  | iron-sulfur cluster-binding protein                                                        | 0.497 | 0.002 | 0.368 | 0.000 | 0.940 | 0.586 |
| 1031794 | COG1186J  | gbs0564 | prfB    | Cellular processes                   | Translation, ribosomal structure and biogenesis                   | Bacterial Peptide Chain Release Factor 2 (RF-2)                                            | 0.798 | 0.013 | 0.765 | 0.004 | 0.997 | 0.973 |
| 1030257 | COG2884D  | gbs0565 | ftsE    | Cellular processes                   | Cell division                                                     | Cell division ATP-binding protein ftsE                                                     | 0.870 | 0.026 | 0.879 | 0.134 | 0.911 | 0.342 |
| 1031425 | COG2177D  | gbs0566 | ftsX    | Cellular processes                   | Cell division                                                     | Cell division protein ftsX                                                                 | 0.937 | 0.118 | 0.923 | 0.046 | 0.869 | 0.034 |
| 1031796 | COG0596R  | gbs0567 |         | General function predicted only      |                                                                   | CARBOXYMETHYLENEBUTENOLIDASE-RELATED PROTEIN                                               | 1.562 | 0.032 | 1.480 | 0.014 | 0.639 | 0.145 |
| 1031200 | COG0491R  | gbs0568 |         | General function predicted only      |                                                                   | Hydroxyacylglutathione hydrolase (EC 3.1.2.6)                                              | 1.613 | 0.061 | 1.536 | 0.006 | 0.552 | 0.087 |
| 1031652 | COG1028IQ | gbs0569 |         | Metabolism and transport             | Fatty acid and phospholipids                                      | (R,R)-butanediol dehydrogenase (EC 1.1.1.4) Acetoin dehydrogenase (EC 1.1.1.5)             | 4.287 | 0.003 | 2.136 | 0.000 | 0.611 | 0.009 |
| 1031729 | COG0847L  | COG     | dinG    | Cellular processes                   | DNA replication, recombination and repair                         | ATP-dependent helicase, DinG family                                                        | 0.701 | 0.006 | 0.952 | 0.184 | 2.072 | 0.004 |
| 1031689 | COG0436E  | gbs0571 | aspC    | Metabolism and transport             | Amino acids, peptides, aminosugars and amines                     | Aspartate aminotransferase (EC 2.6.1.1)                                                    | 0.624 | 0.000 | 0.799 | 0.003 | 3.814 | 0.004 |
| 1031758 | COG0017J  | gbs0572 | asnS    | Cellular processes                   | Translation, ribosomal structure and biogenesis                   | Asparaginyl-tRNA synthetase (EC 6.1.1.22)                                                  | 0.609 | 0.000 | 0.781 | 0.001 | 3.894 | 0.000 |
| 1031767 | -         | gbs0573 |         | Hypothetical                         |                                                                   | Integral membrane protein                                                                  | 0.361 | 0.000 | 0.905 | 0.112 | 3.573 | 0.025 |
| 1031428 | COG1957F  | gbs0574 |         | Metabolism and transport             | Purines, pyrimidines, nucleosides, and nucleotides                | Inosine-uridine preferring nucleoside hydrolase (EC 3.2.2.1)                               | 0.407 | 0.000 | 0.877 | 0.022 | 2.485 | 0.015 |
| 1031406 | COG1764O  | gbs0575 |         | Cellular processes                   | Posttranslational modification, protein turnover, chaperones      | Osmotically inducible protein C                                                            | 1.786 | 0.006 | 1.328 | 0.018 | 0.999 | 0.993 |
| 1031160 | COG1660R  | gbs0576 |         | General function predicted only      |                                                                   | ATP-binding protein (contains P-loop)                                                      | 0.977 | 0.780 | 0.759 | 0.005 | 2.121 | 0.019 |
| 1031710 | -         | gbs0577 |         | Hypothetical                         |                                                                   | Hypothetical membrane associated protein                                                   | 1.048 | 0.459 | 0.734 | 0.004 | 1.445 | 0.023 |
| 1031411 | COG1481S  | gbs0578 |         | Hypothetical                         |                                                                   | Hypothetical cytosolic protein                                                             | 0.914 | 0.153 | 0.724 | 0.009 | 1.424 | 0.021 |
| 1031472 | -         | gbs0579 | pepD    | Cellular processes                   | Posttranslational modification, protein turnover, chaperones      | Dipeptidase A (EC 3.4.13.-)                                                                | 0.969 | 0.587 | 0.836 | 0.138 | 1.431 | 0.066 |
| 1031163 | COG0803P  | COG     |         | Metabolism and transport             | Inorganic ion transport and metabolism                            | High-affinity zinc uptake system protein znuA precursor Hypothetical exported protein      | 0.953 | 0.201 | 1.548 | 0.005 | 2.858 | 0.006 |
| 1031350 | COG0254J  | gbs0581 | rpmE    | Cellular processes                   | Translation, ribosomal structure and biogenesis                   | LSU ribosomal protein L31P                                                                 | 0.944 | 0.139 | 1.150 | 0.003 | 1.059 | 0.725 |
| 1031269 | COG0618R  | gbs0582 |         | Metabolism and transport             | Central intermediary metabolism                                   | Phosphoesterase, DHH family protein                                                        | 1.505 | 0.008 | 1.095 | 0.222 | 1.035 | 0.651 |
| 1031736 | COG1816F  | gbs0583 | add     | Metabolism and transport             | Purines, pyrimidines, nucleosides, and nucleotides                | Adenosine deaminase (EC 3.5.4.4)                                                           | 2.265 | 0.000 | 0.491 | 0.000 | 3.629 | 0.012 |
| 1030782 | COG0716C  | gbs0584 |         | Metabolism and transport             | Energy production and conversion                                  | Flavodoxin                                                                                 | 0.744 | 0.000 | 0.756 | 0.004 | 2.062 | 0.010 |
| 1030889 | -         | gbs0585 |         | Metabolism and transport             | Amino acids, peptides, aminosugars and amines                     | Chorismate mutase (EC 5.4.99.5)                                                            | 0.731 | 0.056 | 0.812 | 0.050 | 3.754 | 0.005 |
| 1031186 | COG0038P  | gbs0586 |         | Metabolism and transport             | Inorganic ion transport and metabolism                            | Chloride channel protein                                                                   | 0.883 | 0.106 | 0.902 | 0.143 | 2.916 | 0.000 |
| 1031049 | -         | gbs0587 | rpIS    | Cellular processes                   | Translation, ribosomal structure and biogenesis                   | LSU ribosomal protein L19P                                                                 | 0.948 | 0.307 | 1.190 | 0.009 | 0.890 | 0.661 |
| 1030772 | COG2963L  | gbs0589 |         | Mobile and extrachromosomal elements |                                                                   | Transposase                                                                                | 1.284 | 0.002 | 1.508 | 0.004 | 1.032 | 0.784 |
| 1031302 | -         | gbs0593 |         | Hypothetical                         |                                                                   | Hypothetical protein                                                                       | 1.876 | 0.022 | 4.227 | 0.018 | 0.269 | 0.097 |
| 1031026 | -         | gbs0594 |         | Transport and binding proteins       | Unknown substrate                                                 | ABC transporter permease protein                                                           | 1.357 | 0.008 | 1.613 | 0.009 | 2.604 | 0.010 |
| 1031257 | COG1136V  | gbs0595 |         | Transport and binding proteins       | Unknown substrate                                                 | ABC transporter ATP-binding protein                                                        | 1.082 | 0.307 | 1.337 | 0.000 | 1.732 | 0.002 |



|         |            |         |      |                                      |                                                                   |                                                                                            |       |       |       |       |        |       |
|---------|------------|---------|------|--------------------------------------|-------------------------------------------------------------------|--------------------------------------------------------------------------------------------|-------|-------|-------|-------|--------|-------|
| 1031223 | -          | gbs0601 |      | Cell Envelope                        | Biosynthesis and degradation of murein sacculus and peptidoglycan | Rod shape-determining protein rodA                                                         | 1,057 | 0,096 | 1,108 | 0,099 | 2,609  | 0,001 |
| 1031348 | COG0546R   | gbs0602 |      | Metabolism and transport             | Central intermediary metabolism                                   | Phosphatase                                                                                | 0,911 | 0,062 | 0,953 | 0,272 | 1,241  | 0,020 |
| 1031332 | COG0187L   | gbs0603 | gyrB | Cellular processes                   | DNA replication, recombination and repair                         | DNA gyrase subunit B (EC 5.99.1.3)                                                         | 0,974 | 0,220 | 1,019 | 0,479 | 1,260  | 0,166 |
| 1031401 | COG4477D   | gbs0604 |      | Cellular processes                   | Cell division                                                     | Septation ring formation regulator                                                         | 0,820 | 0,000 | 0,935 | 0,058 | 1,586  | 0,038 |
| 1031358 | COG0560E   | gbs0605 |      | Metabolism and transport             | Amino acids, peptides, aminosugars and amines                     | Phosphoserine phosphatase (EC 3.1.3.3)                                                     | 0,872 | 0,028 | 0,875 | 0,025 | 9,741  | 0,012 |
| 1031351 | COG0494LR  | gbs0606 |      | Cellular processes                   | DNA replication, recombination and repair                         | Phosphohydrolase (MutT/nudix family protein)                                               | 1,609 | 0,002 | 1,133 | 0,423 | 0,356  | 0,009 |
| 1031360 | COG5506S   | gbs0607 |      | Hypothetical                         |                                                                   | Hypothetical cytosolic protein                                                             | 1,738 | 0,001 | 1,196 | 0,096 | 0,491  | 0,011 |
| 1031354 | COG0148G   | gbs0608 | eno  | Metabolism and transport             | Carbohydrates, organic alcohols, and acids                        | Enolase (EC 4.2.1.11)                                                                      | 0,737 | 0,008 | 0,940 | 0,351 | 0,579  | 0,043 |
| 1031375 | -          | gbs0609 |      | General function predicted only      |                                                                   | Streptodornase (EC 3.1.21.1)                                                               | 0,275 | 0,000 | 0,160 | 0,001 | 0,895  | 0,176 |
| 1031372 | COG0128E   | gbs0610 | aroA | Metabolism and transport             | Amino acids, peptides, aminosugars and amines                     | 3-phosphoshikimate 1-carboxyvinyltransferase (EC 2.5.1.19)                                 | 1,218 | 0,079 | 0,948 | 0,343 | 1,496  | 0,043 |
| 1031039 | COG0703E   | gbs0611 | aroK | Metabolism and transport             | Amino acids, peptides, aminosugars and amines                     | Shikimate kinase (EC 2.7.1.71)                                                             | 1,275 | 0,008 | 1,000 | 0,994 | 1,405  | 0,051 |
| 1030877 | COG1316K   | gbs0612 |      | Cellular processes                   | Transcription                                                     | Transcriptional regulator, LysR family                                                     | 1,239 | 0,025 | 1,000 | 0,999 | 1,158  | 0,068 |
| 1030885 | COG2265J   | gbs0613 |      | Cellular processes                   | Translation, ribosomal structure and biogenesis                   | 23S rRNA(m5U)1939 methyltransferase (EC 2.1.1.-)                                           | 1,104 | 0,297 | 0,860 | 0,097 | 3,694  | 0,001 |
| 1030908 | -          | gbs0614 |      | Hypothetical                         |                                                                   | Hypothetical protein                                                                       | 0,865 | 0,072 | 0,884 | 0,027 | 4,758  | 0,000 |
| 1031260 | COG3700R   | gbs0615 |      | General function predicted only      |                                                                   | Class B acid phosphatase (EC 3.1.3.2)                                                      | 1,138 | 0,097 | 1,129 | 0,205 | 0,848  | 0,016 |
| 1030879 | COG4283S   | gbs0616 |      | Hypothetical                         |                                                                   | Hypothetical cytosolic protein                                                             | 0,998 | 0,979 | 1,115 | 0,065 | 0,937  | 0,401 |
| 1031170 | -          | gbs0617 |      | Hypothetical                         |                                                                   | Hypothetical protein                                                                       | 0,931 | 0,627 | 0,445 | 0,044 | 0,154  | 0,068 |
| 1031249 | COG1309K   | gbs0618 |      | Cellular processes                   | Transcription                                                     | Transcriptional regulator, TetR family                                                     | 0,882 | 0,341 | 0,445 | 0,005 | 0,195  | 0,019 |
| 1030880 | -          | gbs0619 |      | Hypothetical                         |                                                                   | Hypothetical protein                                                                       | 1,046 | 0,568 | 0,981 | 0,915 | 0,284  | 0,026 |
| 1031243 | COG2963L   | gbs0621 |      | Mobile and extrachromosomal elements |                                                                   | Transposase                                                                                | 0,511 | 0,000 | 0,356 | 0,000 | 0,190  | 0,003 |
| 1031262 | -          | gbs0622 |      | Hypothetical                         |                                                                   | Hypothetical protein                                                                       | 0,998 | 0,992 | 1,290 | 0,210 | 0,285  | 0,040 |
| 1031121 | -          | gbs0625 |      | Cellular processes                   | Posttranslational modification, protein turnover, chaperones      | 33 kDa chaperonin                                                                          | 0,482 | 0,002 | 0,349 | 0,000 | 0,264  | 0,020 |
| 1030901 | -          | gbs0627 | araC | Cellular processes                   | Transcription                                                     | Transcriptional regulator, AraC family                                                     | 0,628 | 0,001 | 0,484 | 0,000 | 0,272  | 0,004 |
| 1031310 | COG4932M   | gbs0628 |      | Hypothetical                         |                                                                   | IPXTG Hypothetical protein                                                                 | 0,848 | 0,035 | 1,083 | 0,665 | 0,575  | 0,050 |
| 1031068 | COG4932M   | gbs0629 |      | Cellular processes                   | Posttranslational modification, protein turnover, chaperones      | IPXTG Hypothetical protein                                                                 | 0,346 | 0,021 | 0,422 | 0,034 | 0,832  | 0,740 |
| 1031473 | COG3764M   | gbs0630 |      | Cellular processes                   | Posttranslational modification, protein turnover, chaperones      | Sortase                                                                                    | 0,427 | 0,011 | 0,918 | 0,415 | 0,087  | 0,014 |
| 1031341 | COG3764M   | gbs0631 |      | Cellular processes                   | Posttranslational modification, protein turnover, chaperones      | Sortase                                                                                    | 0,490 | 0,000 | 0,512 | 0,071 | 0,420  | 0,046 |
| 1031148 | COG4932M   | gbs0632 |      | Cell Envelope                        | Other                                                             | FPKTG Collagen adhesion protein                                                            | 0,563 | 0,021 | 0,932 | 0,629 | 0,500  | 0,069 |
| 1030835 | COG4932M   | gbs0636 |      | Metabolism and transport             | Energy production and conversion                                  | Collagen adhesion protein                                                                  | 0,639 | 0,030 | 1,017 | 0,943 | 0,289  | 0,045 |
| 1031305 | -          | gbs0638 |      | Hypothetical                         |                                                                   | Hypothetical protein                                                                       | 1,354 | 0,005 | 0,988 | 0,858 | 0,939  | 0,703 |
| 1031469 | -          | gbs0639 |      | Hypothetical                         |                                                                   | Hypothetical protein                                                                       | 3,072 | 0,435 | 1,021 | 0,908 | 0,338  | 0,024 |
| 1030886 | COG1680V   | gbs0640 |      | Cellular processes                   | Toxin production and resistance                                   | Beta-lactamase family protein                                                              | 1,076 | 0,020 | 1,281 | 0,005 | 0,890  | 0,469 |
| 1030753 | COG4586R   | gbs0641 | drmA | General function predicted only      |                                                                   | Daunorubicin resistance ATP-binding protein drmA                                           | 0,601 | 0,006 | 0,680 | 0,021 | 1,523  | 0,260 |
| 1031475 | COG4587R   | gbs0642 |      | General function predicted only      |                                                                   | Daunorubicin resistance transmembrane protein                                              | 0,801 | 0,250 | 0,917 | 0,646 | 2,843  | 0,041 |
| 1031396 | COG3694R   | gbs0643 |      | Transport and binding proteins       | Unknown substrate                                                 | ABC transporter permease protein                                                           | 0,776 | 0,090 | 0,983 | 0,789 | 13,686 | 0,000 |
| 1031464 | -          | gbs0644 | cyiX | Hypothetical                         |                                                                   | Hypothetical protein                                                                       | 1,647 | 0,002 | 0,703 | 0,045 | 0,226  | 0,009 |
| 1031688 | COG0331I   | gbs0645 | cyiD | Metabolism and transport             | Fatty acid and phospholipids                                      | Malonyl-CoA-[acyl-carrier-protein] reductase (EC 2.3.1.39)                                 | 1,417 | 0,002 | 0,617 | 0,002 | 0,241  | 0,006 |
| 1031686 | COG1028IQR | gbs0646 | cyiG | Metabolism and transport             | Fatty acid and phospholipids                                      | 3-oxoacyl-[acyl-carrier-protein] reductase (EC 1.1.1.100)                                  | 1,016 | 0,772 | 0,476 | 0,007 | 0,179  | 0,002 |
| 1031687 | COG0236IQ  | gbs0647 | acpC | Metabolism and transport             | Fatty acid and phospholipids                                      | Acyl carrier protein                                                                       | 1,309 | 0,001 | 0,585 | 0,004 | 0,188  | 0,013 |
| 1031692 | COG0764I   | gbs0648 | cyiZ | Metabolism and transport             | Fatty acid and phospholipids                                      | (3R)-hydroxymyristoyl-[acyl carrier protein] dehydratase (EC 4.2.1.-)                      | 1,174 | 0,054 | 0,486 | 0,008 | 0,139  | 0,011 |
| 1031693 | COG1131V   | gbs0649 | cyiA | Transport and binding proteins       | Unknown substrate                                                 | Hemolysin export ABC transporter ATP-binding protein                                       | 1,049 | 0,314 | 0,516 | 0,002 | 0,176  | 0,002 |
| 1031691 | -          | gbs0650 | cyiB | Transport and binding proteins       | Unknown substrate                                                 | Hypothetical ABC transporter permease protein                                              | 0,902 | 0,041 | 0,475 | 0,000 | 0,214  | 0,008 |
| 1031430 | -          | gbs0651 | cyiE | Hypothetical                         |                                                                   | Hypothetical protein                                                                       | 0,839 | 0,035 | 0,513 | 0,001 | 0,205  | 0,028 |
| 1031690 | COG0404E   | gbs0652 | cyiF | Metabolism and transport             | Amino acids, peptides, aminosugars and amines                     | Aminomethyltransferase (EC 2.1.2.10)                                                       | 0,834 | 0,002 | 0,498 | 0,000 | 0,224  | 0,009 |
| 1031699 | COG0304IQ  | gbs0653 | cyiI | Metabolism and transport             | Fatty acid and phospholipids                                      | 3-oxoacyl-[acyl-carrier-protein] synthase (EC 2.3.1.41) Chain length factor                | 0,983 | 0,576 | 0,482 | 0,000 | 0,179  | 0,010 |
| 1031696 | COG1819GC  | gbs0654 | cyiJ | Metabolism and transport             | Carbohydrates, organic alcohols, and acids                        | UDP glycosyltransferase (EC 2.4.1.-)                                                       | 0,892 | 0,086 | 0,499 | 0,003 | 0,227  | 0,002 |
| 1031698 | -          | gbs0655 | cyiK | Hypothetical                         |                                                                   | Hypothetical protein                                                                       | 0,854 | 0,083 | 0,502 | 0,005 | 0,266  | 0,010 |
| 1031700 | COG0577V   | gbs0657 |      | Transport and binding proteins       | Unknown substrate                                                 | ABC transporter permease protein                                                           | 0,506 | 0,012 | 0,452 | 0,045 | 0,454  | 0,347 |
| 1031695 | -          | gbs0658 |      | Hypothetical                         |                                                                   | Hypothetical protein                                                                       | 0,487 | 0,015 | 0,724 | 0,100 | 1,374  | 0,527 |
| 1031701 | COG1136V   | gbs0659 |      | Transport and binding proteins       | Unknown substrate                                                 | ABC transporter ATP-binding protein                                                        | 0,724 | 0,356 | 0,771 | 0,510 | 1,274  | 0,751 |
| 1031115 | COG4529S   | gbs0660 |      | Hypothetical                         |                                                                   | Hypothetical exported protein                                                              | 1,781 | 0,001 | 1,670 | 0,001 | 0,450  | 0,000 |
| 1031706 | -          | gbs0661 |      | Cellular processes                   | DNA transformation                                                | DNA-entry nuclease (EC 3.1.30.-)                                                           | 4,469 | 0,002 | 7,570 | 0,001 | 0,724  | 0,006 |
| 1031702 | COG0586S   | gbs0662 |      | General function predicted only      |                                                                   | DedA family protein                                                                        | 2,126 | 0,003 | 1,472 | 0,012 | 0,489  | 0,020 |
| 1031703 | COG4619R   | gbs0663 |      | Transport and binding proteins       | Unknown substrate                                                 | ABC transporter ATP-binding protein                                                        | 3,402 | 0,001 | 2,242 | 0,000 | 0,342  | 0,032 |
| 1031704 | COG0390R   | gbs0664 |      | Transport and binding proteins       | Unknown substrate                                                 | ABC transporter permease protein                                                           | 5,161 | 0,000 | 2,448 | 0,005 | 0,334  | 0,003 |
| 1031705 | -          | gbs0665 |      | Hypothetical                         |                                                                   | Hypothetical protein                                                                       | 1,555 | 0,001 | 1,078 | 0,289 | 1,348  | 0,075 |
| 1031707 | COG0583K   | gbs0666 |      | Cellular processes                   | Transcription                                                     | Transcriptional regulators, LysR family                                                    | 1,269 | 0,005 | 0,967 | 0,563 | 0,888  | 0,334 |
| 1031052 | COG3641R   | gbs0667 |      | Hypothetical                         |                                                                   | Hypothetical membrane spanning protein                                                     | 0,640 | 0,003 | 0,667 | 0,008 | 0,917  | 0,552 |
| 1031708 | COG1052CHR | gbs0668 | ddh  | Metabolism and transport             | Central intermediary metabolism                                   | D-2-hydroxyacid dehydrogenase (EC 1.1.1.-)                                                 | 0,690 | 0,018 | 0,792 | 0,029 | 0,719  | 0,021 |
| 1031711 | COG2211G   | gbs0669 |      | Metabolism and transport             | Carbohydrates, organic alcohols, and acids                        | SUGAR SODIUM SYMPORTER                                                                     | 0,617 | 0,069 | 0,935 | 0,771 | 0,606  | 0,138 |
| 1031712 | COG0524G   | gbs0670 |      | Metabolism and transport             | Carbohydrates, organic alcohols, and acids                        | 2-dehydro-3-deoxygluconokinase (EC 2.7.1.45)                                               | 0,986 | 0,903 | 1,020 | 0,940 | 0,628  | 0,208 |
| 1031721 | COG3250G   | gbs0671 | lacZ | Metabolism and transport             | Carbohydrates, organic alcohols, and acids                        | Beta-glucuronidase (EC 3.2.1.31)                                                           | 0,845 | 0,158 | 1,032 | 0,837 | 0,589  | 0,230 |
| 1031715 | COG2186K   | gbs0672 |      | Cellular processes                   | Transcription                                                     | Transcriptional regulator, GntR family                                                     | 1,408 | 0,007 | 1,104 | 0,099 | 1,362  | 0,089 |
| 1031709 | COG0800G   | gbs0673 |      | Metabolism and transport             | Carbohydrates, organic alcohols, and acids                        | 4-Hydroxy-2-oxoglutarate aldolase (EC 4.1.3.16) 2-dehydro-3-deoxyphosphogluconate aldolase | 0,890 | 0,287 | 0,766 | 0,234 | 0,491  | 0,014 |
| 1030888 | COG1904G   | gbs0674 |      | Metabolism and transport             | Carbohydrates, organic alcohols, and acids                        | Uronate isomerase (EC 5.3.1.12)                                                            | 0,633 | 0,006 | 0,647 | 0,005 | 0,763  | 0,082 |
| 1031717 | COG1312G   | gbs0675 |      | Metabolism and transport             | Carbohydrates, organic alcohols, and acids                        | Mannonate dehydratase (EC 4.2.1.8)                                                         | 0,759 | 0,040 | 0,823 | 0,121 | 0,389  | 0,028 |
| 1031719 | COG1028IQR | gbs0676 |      | Metabolism and transport             | Carbohydrates, organic alcohols, and acids                        | Fructuronate reductase (EC 1.1.1.57)                                                       | 0,713 | 0,008 | 0,883 | 0,307 | 0,486  | 0,001 |
| 1031716 | COG0546R   | gbs0677 |      | Metabolism and transport             | Central intermediary metabolism                                   | Phosphoglycolate phosphatase (EC 3.1.3.18)                                                 | 0,688 | 0,020 | 0,611 | 0,038 | 0,505  | 0,023 |
| 1031371 | -          | gbs0678 |      | Metabolism and transport             | Carbohydrates, organic alcohols, and acids                        | Beta-N-acetylhexosaminidase (EC 3.2.1.52)                                                  | 0,859 | 0,142 | 0,903 | 0,415 | 0,451  | 0,034 |
| 1031724 | COG0006E   | gbs0679 | pepQ | Metabolism and transport             | Amino acids, peptides, aminosugars and amines                     | Xaa-Pro aminopeptidase (EC 3.4.11.9)                                                       | 1,239 | 0,011 | 0,844 | 0,115 | 2,196  | 0,010 |
| 1031718 | COG1609K   | gbs0680 | ccpA | Cellular processes                   | Transcription                                                     | Catabolite control protein A                                                               | 0,949 | 0,050 | 1,030 | 0,353 | 1,593  | 0,001 |
| 1031212 | -          | gbs0681 |      | Metabolism and transport             | Carbohydrates, organic alcohols, and acids                        | Alpha-amylase (EC 3.2.1.1)                                                                 | 1,279 | 0,030 | 0,955 | 0,427 | 1,568  | 0,034 |
| 1031321 | COG0438M   | gbs0682 |      | Metabolism and transport             | Central intermediary metabolism                                   | Glycosyltransferase (EC 2.4.1.-)                                                           | 1,041 | 0,465 | 1,012 | 0,719 | 1,994  | 0,010 |
| 1031726 | COG0438M   | gbs0683 |      | Metabolism and transport             | Central intermediary metabolism                                   | 1,2-diacylglycerol 3-glucosyltransferase (EC 2.4.1.157)                                    | 1,198 | 0,009 | 0,985 | 0,751 | 1,310  | 0,132 |
| 1031722 | COG0441J   | gbs0684 | thrS | Cellular processes                   | Translation, ribosomal structure and biogenesis                   | Threonyl-tRNA synthetase (EC 6.1.1.3)                                                      | 0,629 | 0,005 | 0,898 | 0,073 | 2,828  | 0,000 |
| 1031725 | COG0745TK  | gbs0685 |      | Cellular processes                   | Transcription                                                     | Transcriptional regulatory protein                                                         | 0,415 | 0,001 | 0,449 | 0,000 | 0,461  | 0,069 |
| 1031730 | -          | gbs0686 |      | Hypothetical                         |                                                                   | Hypothetical cytosolic protein                                                             | 2,055 | 0,000 | 1,524 | 0,002 | 0,960  | 0,653 |
| 1031723 | -          | gbs0687 |      | Hypothetical                         |                                                                   | Hypothetical membrane associated protein                                                   | 2,472 | 0,000 | 0,773 | 0,001 | 0,527  | 0,076 |
| 1031728 | COG0765E   | gbs0688 |      | Metabolism and transport             | Amino acids, peptides, aminosugars and amines                     | Glutamine transport system permease protein glnP                                           | 0,595 | 0,000 | 0,555 | 0,000 | 1,018  | 0,684 |
| 1031732 | COG0765E   | gbs0689 |      | Metabolism and transport             | Amino acids, peptides, aminosugars and amines                     | Glutamine transport system permease protein glnP                                           | 0,712 | 0,055 | 0,547 | 0,005 | 1,189  | 0,223 |
| 1031714 | COG0834ET  | gbs0690 |      | Metabolism and transport             | Amino acids, peptides, aminosugars and amines                     | Glutamine-binding protein                                                                  | 0,683 | 0,010 | 0,579 | 0,007 | 1,426  | 0,060 |
| 1031301 | COG1126E   | gbs0691 |      | Metabolism and transport             | Amino acids, peptides, aminosugars and amines                     | Glutamine transport ATP-binding protein glnQ                                               | 0,619 | 0,003 | 0,544 | 0,002 | 1,057  | 0,788 |
| 1031731 | -          | gbs0692 |      | Hypothetical                         |                                                                   | Hypothetical protein                                                                       | 1,343 | 0,003 | 1,296 | 0,258 | 1,889  | 0,170 |
| 1031733 | -          | gbs0693 |      | Hypothetical                         |                                                                   | Hypothetical protein                                                                       | 1,936 | 0,023 | 1,636 | 0,099 | 1,293  | 0,272 |
| 1031727 | -          | gbs0694 |      | Hypothetical                         |                                                                   | Hypothetical protein                                                                       | 1,441 | 0,093 | 1,744 | 0,104 | 1,717  | 0,017 |
| 1031740 | -          | gbs0695 |      | Hypothetical                         |                                                                   | Hypothetical protein                                                                       | 0,917 | 0,646 | 1,206 | 0,201 | 1,098  | 0,703 |
| 1031737 | -          | gbs0696 |      | Hypothetical                         |                                                                   | Hypothetical protein                                                                       | 1,283 | 0,148 | 1,466 | 0,098 | 2,823  | 0,110 |
| 1031741 | -          | gbs0697 |      | Hypothetical                         |                                                                   | Hypothetical protein                                                                       | 1,285 | 0,129 | 1,622 | 0,026 | 1,479  | 0,247 |
| 1031735 | -          | gbs0698 |      | General function predicted only      |                                                                   | RepR protein                                                                               | 1,117 | 0,152 | 1,259 | 0,078 | 1,006  | 0,973 |
| 1031745 | -          | gbs0699 |      | Hypothetical                         |                                                                   | Hypothetical protein                                                                       | 1,169 | 0,335 | 1,243 | 0,291 | 1,073  | 0,886 |
| 1031734 | -          | gbs0700 |      | Hypothetical                         |                                                                   | Hypothetical protein                                                                       | 1,058 |       |       |       |        |       |

|         |               |         |               |                                 |                                                                   |                                                                                           |                                                                         |       |       |       |        |       |       |
|---------|---------------|---------|---------------|---------------------------------|-------------------------------------------------------------------|-------------------------------------------------------------------------------------------|-------------------------------------------------------------------------|-------|-------|-------|--------|-------|-------|
| 1031738 | -             | gbs0702 |               | Hypothetical                    |                                                                   | Hypothetical protein                                                                      | 0.788                                                                   | 0.189 | 1.343 | 0.107 | 1.399  | 0.067 |       |
| 1031743 | -             | gbs0703 |               | Hypothetical                    |                                                                   | Hypothetical protein                                                                      | 0.772                                                                   | 0.017 | 1.223 | 0.002 | 1.322  | 0.053 |       |
| 1031753 | -             | gbs0708 |               | Hypothetical                    |                                                                   | Hypothetical protein                                                                      | 0.919                                                                   | 0.244 | 1.049 | 0.506 | 1.435  | 0.115 |       |
| 1031750 | COG0542O      | gbs0718 |               | Hypothetical                    |                                                                   | Hypothetical protein                                                                      | 0.649                                                                   | 0.002 | 1.492 | 0.004 | 1.367  | 0.067 |       |
| 1031769 | -             | gbs0727 |               | Hypothetical                    |                                                                   | Hypothetical protein                                                                      | 0.927                                                                   | 0.272 | 0.773 | 0.012 | 0.406  | 0.001 |       |
| 1030882 | -             | gbs0728 |               | Hypothetical                    |                                                                   | Hypothetical protein                                                                      | 0.996                                                                   | 0.949 | 1.321 | 0.095 | 0.777  | 0.319 |       |
| 1031772 | COG0272L      | gbs0729 |               | Hypothetical                    |                                                                   | Hypothetical protein                                                                      | 1.078                                                                   | 0.191 | 1.712 | 0.002 | 0.855  | 0.336 |       |
| 1031768 | -             | gbs0730 |               | Hypothetical                    |                                                                   | Hypothetical protein                                                                      | 0.830                                                                   | 0.168 | 1.276 | 0.144 | 2.266  | 0.002 |       |
| 1031771 | -             | gbs0731 |               | Hypothetical                    |                                                                   | Hypothetical protein                                                                      | 0.894                                                                   | 0.235 | 1.333 | 0.001 | 1.240  | 0.237 |       |
| 1030878 | COG0745TK     | gbs0741 | vicR          | Cellular processes              | Signal transduction                                               | Two-component response regulator VicR                                                     | 1.027                                                                   | 0.340 | 1.043 | 0.114 | 1.351  | 0.026 |       |
| 1031774 | COG5002T      | gbs0742 | vicK          | Cellular processes              | Signal transduction                                               | Two-component sensor histidine kinase VicK (EC 2.7.3.-)                                   | 1.014                                                                   | 0.774 | 1.007 | 0.753 | 1.341  | 0.052 |       |
| 1031197 | COG1235R      | gbs0743 | vicX          | General function predicted only |                                                                   | Zn-dependent hydrolase (beta-lactamase superfamily)                                       | 1.109                                                                   | 0.076 | 1.098 | 0.057 | 1.177  | 0.127 |       |
| 1030918 | COG2832S      | gbs0744 |               | Hypothetical                    |                                                                   | Hypothetical membrane spanning protein                                                    | 0.973                                                                   | 0.311 | 1.127 | 0.027 | 1.712  | 0.000 |       |
| 1031165 | COG0571K      | gbs0745 | mcS           | Cellular processes              | Transcription                                                     | Ribonuclease III (EC 3.1.26.3)                                                            | 1.098                                                                   | 0.068 | 1.003 | 0.924 | 1.125  | 0.397 |       |
| 1031776 | COG1196D      | gbs0746 | smc           | Cellular processes              | Cell division                                                     | Chromosome partition protein smc                                                          | 0.852                                                                   | 0.083 | 1.167 | 0.004 | 1.633  | 0.003 |       |
| 1030834 | COG0561R      | gbs0747 |               | Metabolism and transport        | Central intermediary metabolism                                   | Hydrolase (HAD superfamily)                                                               | 1.257                                                                   | 0.021 | 1.004 | 0.871 | 1.202  | 0.105 |       |
| 1031298 | COG0561R      | gbs0748 |               | Metabolism and transport        | Central intermediary metabolism                                   | Hydrolase (HAD superfamily)                                                               | 0.938                                                                   | 0.122 | 1.094 | 0.196 | 1.193  | 0.180 |       |
| 1031780 | COG0552U      | gbs0749 | ftsY          | Cellular processes              | Cell division                                                     | Cell division protein ftsY                                                                | 1.027                                                                   | 0.446 | 1.114 | 0.014 | 1.309  | 0.003 |       |
| 1031777 | COG3689S      | gbs0750 |               | Hypothetical                    |                                                                   | Hypothetical membrane spanning protein                                                    | 2.114                                                                   | 0.003 | 2.239 | 0.001 | 1.275  | 0.128 |       |
| 1031216 | COG0701R      | gbs0751 |               | Hypothetical                    |                                                                   | Hypothetical membrane spanning protein                                                    | 2.593                                                                   | 0.001 | 2.429 | 0.000 | 1.495  | 0.011 |       |
| 1031779 | -             | gbs0752 |               | Hypothetical                    |                                                                   | Hypothetical protein                                                                      | 2.766                                                                   | 0.000 | 2.389 | 0.001 | 1.416  | 0.038 |       |
| 1031151 | COG2141C      | gbs0753 |               | Metabolism and transport        | Energy production and conversion                                  | Luciferase-like monooxygenase (EC 1.14.-.-)                                               | 1.508                                                                   | 0.013 | 0.653 | 0.024 | 0.389  | 0.002 |       |
| 1031205 | COG2183K      | gbs0754 |               | Cellular processes              | Transcription                                                     | TRANSCRIPTION ACCESSORY PROTEIN (S1 RNA binding domain)                                   | 1.022                                                                   | 0.893 | 1.247 | 0.198 | 0.691  | 0.230 |       |
| 1031050 | -             | gbs0755 |               | Cellular processes              |                                                                   | Metallopeptidase, SprT family (EC 3.4.24.-)                                               | 0.844                                                                   | 0.006 | 1.058 | 0.160 | 0.885  | 0.139 |       |
| 1031462 | COG1983KT     | gbs0756 |               | Cellular processes              | Transcription                                                     | Stress-responsive transcriptional regulator PspC                                          | 1.732                                                                   | 0.004 | 2.583 | 0.003 | 0.456  | 0.013 |       |
| 1031783 | COG1493T      | gbs0757 | ptsK          | Cellular processes              | Signal transduction                                               | HPR(SER) KINASE (EC 2.7.1.-) PHOSPHATASE (EC 3.1.3.-)                                     | 1.650                                                                   | 0.001 | 1.496 | 0.008 | 0.994  | 0.907 |       |
| 1031041 | -             | gbs0758 | igt           | Cellular processes              | Posttranslational modification, protein turnover, chaperones      | Prolipoprotein diacylglycerol transferase (EC 2.4.99.-)                                   | 1.648                                                                   | 0.001 | 1.643 | 0.002 | 0.854  | 0.024 |       |
| 1031264 | COG4768R      | gbs0759 |               | Hypothetical                    |                                                                   | Hypothetical protein                                                                      | 1.854                                                                   | 0.001 | 1.637 | 0.000 | 0.657  | 0.006 |       |
| 1031781 | -             | gbs0760 |               | Hypothetical                    |                                                                   | Hypothetical exported protein                                                             | 1.538                                                                   | 0.000 | 1.483 | 0.003 | 0.657  | 0.003 |       |
| 1031786 | -             | gbs0761 |               | Hypothetical                    |                                                                   | Hypothetical protein                                                                      | 0.745                                                                   | 0.008 | 0.953 | 0.295 | 0.983  | 0.876 |       |
| 1031183 | -             | gbs0762 |               | Cellular processes              | Posttranslational modification, protein turnover, chaperones      | Peptidase family U32                                                                      | 0.472                                                                   | 0.013 | 1.129 | 0.166 | 0.805  | 0.260 |       |
| 1031342 | -             | gbs0763 |               | Cellular processes              | Posttranslational modification, protein turnover, chaperones      | Peptidase family U32                                                                      | 0.419                                                                   | 0.003 | 1.061 | 0.379 | 1.138  | 0.492 |       |
| 1031363 | COG4443S      | gbs0764 |               | Hypothetical                    |                                                                   | Hypothetical cytosolic protein                                                            | 1.031                                                                   | 0.822 | 1.235 | 0.038 | 1.231  | 0.065 |       |
| 1031785 | -             | gbs0765 |               | Hypothetical                    |                                                                   | Hypothetical protein                                                                      | 1.329                                                                   | 0.004 | 0.479 | 0.001 | 0.567  | 0.013 |       |
| 1031379 | COG1914P      | gbs0766 |               | Metabolism and transport        | Inorganic ion transport and metabolism                            | Manganese transport protein mntH                                                          | 1.005                                                                   | 0.871 | 1.015 | 0.645 | 1.804  | 0.003 |       |
| 1031104 | COG0117H, COG | gbs0767 |               | Metabolism and transport        | Cofactors, prosthetic groups, and carriers                        | Diaminohydroxyphosphoribosylamino-pyrimidine deaminase (EC 3.5.4.26) 5-amino-6-(5-phosph  | 3.272                                                                   | 0.003 | 3.827 | 0.002 | 12.532 | 0.000 |       |
| 1031789 | COG0307H      | gbs0768 |               | Metabolism and transport        | Cofactors, prosthetic groups, and carriers                        | Riboflavin synthase alpha chain (EC 2.5.1.9)                                              | 3.322                                                                   | 0.005 | 3.612 | 0.000 | 2.935  | 0.002 |       |
| 1031790 | COG0807H      | gbs0769 |               | Metabolism and transport        | Cofactors, prosthetic groups, and carriers                        | GTP cyclohydrolase II (EC 3.5.4.25) 3,4-dihydroxy-2-butanone-4-phosphate synthase (EC 4.1 | 3.394                                                                   | 0.000 | 3.791 | 0.003 | 2.084  | 0.017 |       |
| 1031373 | -             | gbs0770 |               | Metabolism and transport        | Cofactors, prosthetic groups, and carriers                        | 6,7-dimethyl-8-ribitylmazine synthase (EC 2.5.1.9)                                        | 2.914                                                                   | 0.003 | 2.813 | 0.000 | 2.360  | 0.007 |       |
| 1031784 | COG1190J      | gbs0771 | lysS          | Cellular processes              | Translation, ribosomal structure and biogenesis                   | Lysyl-tRNA synthetase (EC 6.1.1.6)                                                        | 0.883                                                                   | 0.079 | 0.963 | 0.388 | 4.368  | 0.001 |       |
| 1031788 | COG1011R      | gbs0772 |               | Metabolism and transport        | Central intermediary metabolism                                   | Haloacid dehalogenase-like hydrolase                                                      | 0.641                                                                   | 0.008 | 0.816 | 0.014 | 0.572  | 0.214 |       |
| 1031445 | COG0406G      | gbs0773 |               | Metabolism and transport        | Carbohydrates, organic alcohols, and acids                        | Phosphoglycerate mutase family protein                                                    | 1.332                                                                   | 0.033 | 1.130 | 0.045 | 0.481  | 0.024 |       |
| 1031793 | COG2606S      | gbs0774 |               | Cellular processes              | Transcription                                                     | Transcriptional regulator                                                                 | 1.560                                                                   | 0.011 | 1.249 | 0.049 | 0.521  | 0.026 |       |
| 1031787 | COG0451MG, CO | gbs0775 |               | General function predicted only |                                                                   | NADH-ubiquinone oxidoreductase 39-40 kDa subunit homolog                                  | 0.909                                                                   | 0.342 | 0.587 | 0.014 | 0.527  | 0.197 |       |
| 1031042 | COG3757M      | gbs0776 |               | Cellular processes              | Posttranslational modification, protein turnover, chaperones      | N-acetylmuramoyl-L-alanine amidase (EC 3.5.1.28)                                          | 1.199                                                                   | 0.008 | 1.072 | 0.134 | 1.093  | 0.191 |       |
| 1031791 | -             | gbs0777 |               | Hypothetical                    |                                                                   | Integral membrane protein                                                                 | 1.262                                                                   | 0.014 | 1.064 | 0.471 | 0.600  | 0.124 |       |
| 1030905 | -             | gbs0778 |               | Hypothetical                    |                                                                   | Hypothetical exported protein                                                             | 1.335                                                                   | 0.002 | 1.279 | 0.000 | 0.756  | 0.281 |       |
| 1031466 | COG1164E      | gbs0779 | pepF          | Metabolism and transport        | Amino acids, peptides, aminosugars and amines                     | Oligoendopeptidase F (EC 3.4.24.-)                                                        | 1.291                                                                   | 0.003 | 0.760 | 0.007 | 1.622  | 0.012 |       |
| 1031917 | COG2352C      | gbs0780 | ppc           | Metabolism and transport        | Energy production and conversion                                  | Phosphoenolpyruvate carboxylase (EC 4.1.1.31)                                             | 0.891                                                                   | 0.012 | 0.690 | 0.001 | 0.846  | 0.055 |       |
| 1031792 | -             | gbs0781 | ftsW          | Cellular processes              | Cell division                                                     | Cell division protein ftsW                                                                | 1.074                                                                   | 0.193 | 1.120 | 0.172 | 1.220  | 0.231 |       |
| 1031913 | COG0050J      | gbs0782 | tuf           | Cellular processes              | Translation, ribosomal structure and biogenesis                   | Protein Translation Elongation Factor Tu (EF-TU)                                          | 0.785                                                                   | 0.092 | 1.022 | 0.621 | 0.521  | 0.068 |       |
| 1031916 | COG0149G      | gbs0783 | tpiA          | Metabolism and transport        | Carbohydrates, organic alcohols, and acids                        | Triosephosphate isomerase (EC 5.3.1.1)                                                    | 0.918                                                                   | 0.106 | 0.950 | 0.171 | 1.188  | 0.024 |       |
| 1031918 | COG0588G      | gbs0784 | gpmA          | Metabolism and transport        | Carbohydrates, organic alcohols, and acids                        | Phosphoglycerate mutase (EC 5.4.2.1)                                                      | 0.938                                                                   | 0.192 | 1.020 | 0.751 | 2.521  | 0.001 |       |
| 1031914 | COG0768M      | gbs0785 | Cell Envelope |                                 | Biosynthesis and degradation of murein sacculus and peptidoglycan | Penicillin-binding protein                                                                | 1.371                                                                   | 0.000 | 1.786 | 0.000 | 2.384  | 0.016 |       |
| 1031920 | COG0353L      | gbs0786 | recR          | Cellular processes              | DNA replication, recombination and repair                         | Recombination protein recR                                                                | 1.343                                                                   | 0.001 | 1.953 | 0.000 | 1.936  | 0.023 |       |
| 1031911 | COG1181M      | gbs0787 | ddl           | Cell Envelope                   |                                                                   | Biosynthesis and degradation of murein sacculus and peptidoglycan                         | D-alanine-D-alanine ligase (EC 6.3.2.4)                                 | 0.818 | 0.002 | 1.047 | 0.443  | 1.061 | 0.449 |
| 1031919 | COG0770M      | gbs0788 | murF          | Cell Envelope                   |                                                                   | Biosynthesis and degradation of murein sacculus and peptidoglycan                         | UDP-N-acetylmuramoyl-tripeptide-D-alanyl-D-alanine ligase (EC 6.3.2.10) | 1.118 | 0.103 | 1.177 | 0.108  | 2.733 | 0.003 |
| 1031915 | -             | gbs0789 |               | Transport and binding proteins  | Unknown substrate                                                 | Transporter, MFS superfamily                                                              | 1.851                                                                   | 0.036 | 0.380 | 0.015 | 1.342  | 0.390 |       |
| 1031924 | COG5522S      | gbs0790 |               | Hypothetical                    |                                                                   | Hypothetical membrane spanning protein                                                    | 1.043                                                                   | 0.588 | 0.915 | 0.353 | 0.883  | 0.728 |       |
| 1031910 | -             | gbs0791 |               | Hypothetical                    |                                                                   | LPXTG Surface anchor protein                                                              | 0.885                                                                   | 0.093 | 1.241 | 0.036 | 1.675  | 0.139 |       |
| 1031905 | COG4108J      | gbs0792 | prfC          | Cellular processes              | Translation, ribosomal structure and biogenesis                   | Bacterial Peptide Chain Release Factor 3 (RF-3)                                           | 0.910                                                                   | 0.112 | 1.170 | 0.092 | 1.360  | 0.024 |       |
| 1031912 | -             | gbs0793 |               | Hypothetical                    |                                                                   | Hypothetical cytosolic protein                                                            | 1.240                                                                   | 0.012 | 0.970 | 0.635 | 1.765  | 0.054 |       |
| 1031922 | COG1135P      | gbs0794 |               | Metabolism and transport        | Inorganic ion transport and metabolism                            | Probable D-methionine transport ATP-binding protein metN                                  | 1.890                                                                   | 0.000 | 0.901 | 0.275 | 1.133  | 0.614 |       |
| 1031921 | COG2011P      | gbs0795 |               | Transport and binding proteins  | Unknown substrate                                                 | ABC transporter permease protein                                                          | 2.364                                                                   | 0.029 | 0.874 | 0.264 | 0.791  | 0.171 |       |
| 1031923 | COG1464P      | gbs0796 |               | Transport and binding proteins  | Unknown substrate                                                 | ABC transporter substrate-binding protein                                                 | 2.176                                                                   | 0.007 | 0.994 | 0.967 | 1.091  | 0.485 |       |
| 1031907 | COG0513LKJ    | gbs0797 | deaD          | Cellular processes              | DNA replication, recombination and repair                         | ATP-dependent RNA helicase                                                                | 1.071                                                                   | 0.329 | 2.528 | 0.000 | 8.835  | 0.003 |       |
| 1031909 | COG2827L      | gbs0798 |               | Hypothetical                    |                                                                   | Hypothetical protein with endo xincinuclease domain                                       | 0.837                                                                   | 0.050 | 0.835 | 0.053 | 0.438  | 0.031 |       |
| 1031906 | COG4123R      | gbs0799 |               | Metabolism and transport        | Central intermediary metabolism                                   | Methyltransferase (EC 2.1.1.-)                                                            | 0.754                                                                   | 0.006 | 0.809 | 0.002 | 0.733  | 0.075 |       |
| 1031926 | COG0204I      | gbs0800 |               | Metabolism and transport        | Fatty acid and phospholipids                                      | 1-acyl-sn-glycerol-3-phosphate acyltransferase (EC 2.3.1.51)                              | 0.993                                                                   | 0.870 | 1.021 | 0.071 | 1.627  | 0.000 |       |
| 1031925 | COG1555L      | gbs0801 |               | Cellular processes              | DNA transformation                                                | COME operon protein 1                                                                     | 0.670                                                                   | 0.646 | 0.751 | 0.350 | 2.200  | 0.291 |       |
| 1031903 | COG0658R, COG | gbs0802 | comEC         | General function predicted only |                                                                   | COME operon protein 3                                                                     | 0.836                                                                   | 0.042 | 1.071 | 0.712 | 1.726  | 0.159 |       |
| 1031902 | COG0561R      | gbs0803 |               | Metabolism and transport        | Central intermediary metabolism                                   | Hydrolase (HAD superfamily)                                                               | 1.213                                                                   | 0.016 | 1.155 | 0.100 | 0.602  | 0.292 |       |
| 1031904 | COG1609K      | gbs0804 |               | Cellular processes              | Transcription                                                     | Catabolite control protein B                                                              | 1.313                                                                   | 0.004 | 1.098 | 0.093 | 1.100  | 0.061 |       |
| 1031908 | COG0657I      | gbs0805 |               | Metabolism and transport        | Fatty acid and phospholipids                                      | Esterase (EC 3.1.1.-)                                                                     | 4.394                                                                   | 0.001 | 1.578 | 0.003 | 1.886  | 0.005 |       |
| 1031888 | COG0500QR     | gbs0806 |               | Metabolism and transport        | Secondary metabolites                                             | Biotin synthesis protein bioC                                                             | 0.880                                                                   | 0.165 | 0.975 | 0.710 | 0.542  | 0.021 |       |
| 1031901 | COG1466L      | gbs0807 |               | Cellular processes              | DNA replication, recombination and repair                         | DNA polymerase III, delta subunit (EC 2.7.7.7)                                            | 0.980                                                                   | 0.573 | 1.126 | 0.057 | 0.875  | 0.337 |       |
| 1031927 | COG0605P      | gbs0808 | sodA          | Metabolism and transport        | Inorganic ion transport and metabolism                            | Superoxide dismutase (EC 1.15.1.1)                                                        | 1.787                                                                   | 0.000 | 1.282 | 0.013 | 1.504  | 0.000 |       |
| 1031900 | COG3711K      | gbs0809 | licT          | Cellular processes              | Transcription                                                     | Transcription antiterminator, BglI family                                                 | 0.965                                                                   | 0.708 | 1.324 | 0.079 | 1.006  | 0.989 |       |
| 1031929 | COG1263G      | gbs0810 |               | Metabolism and transport        | Carbohydrates, organic alcohols, and acids                        | PTS system, beta-glucoside-specific IIBC component (EC 2.7.1.69)                          | 0.539                                                                   | 0.021 | 1.756 | 0.035 | 1.644  | 0.110 |       |
| 1031897 | -             | gbs0811 | bgIA          | Metabolism and transport        | Carbohydrates, organic alcohols, and acids                        | 6-phospho-beta-glucosidase (EC 3.2.1.86)                                                  | 0.702                                                                   | 0.001 | 0.640 | 0.014 | 1.604  | 0.002 |       |
| 1031899 | COG3835KT     | gbs0812 |               | Cellular processes              | Transcription                                                     | Transcriptional regulatory protein                                                        | 1.174                                                                   | 0.140 | 0.889 | 0.181 | 1.924  | 0.002 |       |
| 1031896 | -             | gbs0813 |               | Metabolism and transport        | Energy production and conversion                                  | Glycerate kinase (EC 2.7.1.31)                                                            | 0.891                                                                   | 0.589 | 2.069 | 0.123 | 2.785  | 0.051 |       |
| 1031898 | COG2610GE     | gbs0814 |               | Metabolism and transport        | Carbohydrates, organic alcohols, and acids                        | Glucuronate permease                                                                      | 0.855                                                                   | 0.006 | 1.012 | 0.819 | 3.106  | 0.006 |       |
| 1031893 | COG1686M, COG | gbs0815 |               | Cellular processes              | Posttranslational modification, protein turnover, chaperones      | Peptidase family S11                                                                      | 0.344                                                                   | 0.000 | 0.444 | 0.000 | 0.528  | 0.027 |       |
| 1031928 | COG1846K      | gbs0816 |               | Cellular processes              | Transcription                                                     | Transcriptional regulator, MarR family                                                    | 0.984                                                                   | 0.618 | 1.173 | 0.000 | 1.008  | 0.949 |       |
| 1031930 | -             | gbs0817 | queA          | Cellular processes              | Translation, ribosomal structure and biogenesis                   | S-adenosylmethionine:tRNA ribosyltransferase-isomerase (EC 5.-.-.-)                       | 1.423                                                                   | 0.091 | 1.233 | 0.065 | 1.329  | 0.062 |       |
| 1031894 | COG1814S      | gbs0818 |               | Hypothetical                    |                                                                   | Hypothetical membrane associated protein                                                  | 1.860                                                                   | 0.016 | 0.005 | 0.966 | 0.209  | 0.017 |       |
| 1031895 | COG0363G      | gbs0819 | nagB          | Metabolism and transport        | Carbohydrates, organic alcohols, and acids                        | Glucosamine-6-phosphate isomerase (EC 3.5.99.6)                                           | 0.956                                                                   | 0.313 | 1.766 | 0.006 | 0.575  | 0.003 |       |
| 1031890 | COG0435O      | gbs0820 |               | Metabolism and transport        | Central intermediary metabolism                                   | Glutathione S-transferase family protein                                                  | 3.013                                                                   | 0.000 | 1.334 | 0.057 | 1.077  | 0.645 |       |
| 1031932 | COG1187J      | gbs0821 |               | Cellular processes              | Translation, ribosomal structure and biogenesis                   | Ribosomal small subunit pseudouridine synthase A (EC 4.2.1.70)                            | 1.216                                                                   | 0.001 | 0.928 |       |        |       |       |



|         |               |         |        |                                 |                                                                                 |                                                                                              |       |       |       |       |       |       |
|---------|---------------|---------|--------|---------------------------------|---------------------------------------------------------------------------------|----------------------------------------------------------------------------------------------|-------|-------|-------|-------|-------|-------|
| 1029783 | COG1164E      | gbs0824 | pepB   | Metabolism and transport        | Amino acids, peptides, aminosugars and amines                                   | Oligoendopeptidase F (EC 3.4.24.-)                                                           | 1,117 | 0,013 | 0,873 | 0,219 | 2,474 | 0,029 |
| 1029784 | COG0546R      | gbs0825 |        | Metabolism and transport        | Central intermediary metabolism                                                 | Phosphoglycolate phosphatase (EC 3.1.3.18)                                                   | 0,859 | 0,017 | 0,843 | 0,033 | 1,173 | 0,571 |
| 1031933 | COG4122R      | gbs0826 |        | Cellular processes              | Posttranslational modification, protein turnover, chaperones                    | O-methyltransferase (EC 2.1.1.-)                                                             | 1,000 | 0,997 | 1,173 | 0,016 | 1,106 | 0,650 |
| 1031892 | COG0760O      | gbs0827 | prsA   | Cellular processes              | Posttranslational modification, protein turnover, chaperones                    | Peptidyl-prolyl cis-trans isomerase (EC 5.2.1.8)                                             | 1,171 | 0,006 | 0,990 | 0,292 | 1,370 | 0,181 |
| 1029786 | COG4894S      | gbs0828 |        | Hypothetical                    |                                                                                 | Hypothetical protein                                                                         | 1,159 | 0,115 | 0,728 | 0,049 | 0,618 | 0,059 |
| 1029789 | COG0013J      | gbs0829 | alaS   | Cellular processes              | Translation, ribosomal structure and biogenesis                                 | Alanyl-tRNA synthetase (EC 6.1.1.7)                                                          | 0,629 | 0,000 | 0,740 | 0,001 | 0,939 | 0,561 |
| 1029810 | COG1811R      | gbs0830 |        | Hypothetical                    |                                                                                 | Hypothetical membrane spanning protein                                                       | 0,633 | 0,001 | 0,591 | 0,001 | 1,423 | 0,070 |
| 1031935 | COG1442M      | gbs0831 |        | Metabolism and transport        | Central intermediary metabolism                                                 | Lipopolysaccharide 1,2-glucosyltransferase (EC 2.4.1.58)                                     | 1,375 | 0,067 | 1,217 | 0,070 | 0,686 | 0,037 |
| 1029812 | -             | gbs0832 |        | Hypothetical                    |                                                                                 | Hypothetical protein                                                                         | 0,672 | 0,001 | 1,018 | 0,842 | 0,787 | 0,025 |
| 1029805 | COG1476K      | gbs0833 |        | Cellular processes              | Transcription                                                                   | Transcriptional regulator, Cro CI family                                                     | 0,741 | 0,008 | 0,865 | 0,005 | 0,815 | 0,129 |
| 1029809 | -             | gbs0834 |        | Hypothetical                    |                                                                                 | Hypothetical membrane spanning protein                                                       | 0,823 | 0,010 | 0,913 | 0,125 | 0,844 | 0,319 |
| 1029785 | COG3859S      | gbs0835 |        | Transport and binding proteins  | Unknown substrate                                                               | Thiamine transporter                                                                         | 1,609 | 0,040 | 2,200 | 0,000 | 0,542 | 0,018 |
| 1029811 | COG0208F      | gbs0836 | nrdF.2 | Metabolism and transport        | Purines, pyrimidines, nucleosides, and nucleotides                              | Ribonucleoside-diphosphate reductase beta chain (EC 1.17.4.1)                                | 1,038 | 0,059 | 1,544 | 0,000 | 2,031 | 0,001 |
| 1029807 | COG0209F      | gbs0837 | nrdE.2 | Metabolism and transport        | Purines, pyrimidines, nucleosides, and nucleotides                              | Ribonucleoside-diphosphate reductase alpha chain (EC 1.17.4.1)                               | 1,219 | 0,008 | 1,691 | 0,005 | 1,581 | 0,139 |
| 1029814 | COG0695O      | gbs0838 | nrdH   | Cellular processes              | Posttranslational modification, protein turnover, chaperones                    | Glutaredoxin                                                                                 | 1,024 | 0,758 | 1,258 | 0,007 | 1,309 | 0,009 |
| 1029813 | COG1925G      | gbs0839 | ptsH   | Metabolism and transport        | Carbohydrates, organic alcohols, and acids                                      | Phosphocarrier protein HPr                                                                   | 0,893 | 0,107 | 1,009 | 0,827 | 0,570 | 0,003 |
| 1029818 | COG1080G      | gbs0840 | pslI   | Metabolism and transport        | Carbohydrates, organic alcohols, and acids                                      | Phosphoenolpyruvate-protein phosphotransferase (EC 2.7.3.9)                                  | 0,747 | 0,000 | 1,025 | 0,573 | 1,251 | 0,024 |
| 1029815 | COG1012C      | gbs0841 | gapN   | Metabolism and transport        | Energy production and conversion                                                | NADP-dependent glyceraldehyde-3-phosphate dehydrogenase (EC 1.2.1.9)                         | 1,123 | 0,136 | 1,084 | 0,014 | 2,180 | 0,004 |
| 1029817 | -             | gbs0842 |        | Cell Envelope                   | Biosynthesis and degradation of surface polysaccharides and lipopolysaccharides | Peptidoglycan N-acetylglucosamine deacetylase (EC 3.5.1.-)                                   | 0,975 | 0,685 | 1,182 | 0,003 | 3,379 | 0,001 |
| 1029819 | COG0513L.KJ   | gbs0843 | deaD2  | Cellular processes              | DNA replication, recombination and repair                                       | ATP-dependent RNA helicase                                                                   | 0,972 | 0,463 | 1,182 | 0,091 | 0,823 | 0,000 |
| 1029822 | COG0572F      | gbs0844 | udk    | Metabolism and transport        | Purines, pyrimidines, nucleosides, and nucleotides                              | Uridine kinase (EC 2.7.1.48)                                                                 | 0,588 | 0,001 | 0,877 | 0,113 | 1,517 | 0,008 |
| 1029825 | COG1956T      | gbs0845 |        | Cellular processes              | Signal transduction                                                             | GAF domain-containing proteins                                                               | 1,302 | 0,018 | 1,036 | 0,449 | 0,959 | 0,869 |
| 1029829 | COG2812L      | gbs0846 |        | Cellular processes              | DNA replication, recombination and repair                                       | DNA polymerase III subunit gamma tau (EC 2.7.7.7)                                            | 0,874 | 0,000 | 1,119 | 0,069 | 1,579 | 0,029 |
| 1029820 | -             | gbs0847 |        | Hypothetical                    |                                                                                 | Hypothetical protein                                                                         | 0,993 | 0,940 | 1,051 | 0,524 | 1,239 | 0,031 |
| 1029826 | COG0340H, COG | gbs0848 | birA   | Cellular processes              | Transcription                                                                   | Biotin operon repressor Biotin-[acetyl-CoA-carboxylase] synthetase (EC 6.3.4.15)             | 1,938 | 0,030 | 1,745 | 0,016 | 0,547 | 0,118 |
| 1029821 | COG0192H      | gbs0849 | metK2  | Metabolism and transport        | Cofactors, prosthetic groups, and carriers                                      | S-adenosylmethionine synthetase (EC 2.5.1.6)                                                 | 1,002 | 0,976 | 0,948 | 0,394 | 1,605 | 0,004 |
| 1029828 | -             | gbs0850 | ftsB   | Hypothetical                    |                                                                                 | Hypothetical protein                                                                         | 0,888 | 0,287 | 1,562 | 0,012 | 1,517 | 0,514 |
| 1029823 | -             | gbs0851 |        | Hypothetical                    |                                                                                 | Hypothetical protein                                                                         | 1,466 | 0,012 | 1,558 | 0,012 | 1,193 | 0,697 |
| 1029834 | -             | gbs0852 |        | Hypothetical                    |                                                                                 | Hypothetical protein                                                                         | 1,078 | 0,445 | 1,267 | 0,212 | 0,727 | 0,146 |
| 1029824 | COG4732S      | gbs0853 |        | Transport and binding proteins  | Unknown substrate                                                               | Hydroxyethylthiazole permease                                                                | 0,305 | 0,184 | 1,072 | 0,790 | 0,483 | 0,302 |
| 1029833 | COG4721S      | gbs0854 |        | Transport and binding proteins  | Unknown substrate                                                               | Hydroxymethylpyrimidine transport system permease protein                                    | 0,207 | 0,001 | 0,870 | 0,733 | 3,097 | 0,318 |
| 1029836 | COG1122P      | gbs0855 |        | Metabolism and transport        | Inorganic ion transport and metabolism                                          | Transporter                                                                                  | 0,550 | 0,123 | 0,760 | 0,074 | 0,629 | 0,192 |
| 1029832 | COG0619P      | gbs0856 |        | Metabolism and transport        | Inorganic ion transport and metabolism                                          | Hydroxymethylpyrimidine transport system permease protein                                    | 0,482 | 0,010 | 0,905 | 0,432 | 0,806 | 0,714 |
| 1029838 | COG0819K      | gbs0857 |        | Cellular processes              | Transcription                                                                   | Transcriptional activator tenA                                                               | 0,617 | 0,040 | 0,689 | 0,009 | 0,391 | 0,046 |
| 1029827 | COG0351H      | gbs0858 |        | Metabolism and transport        | Cofactors, prosthetic groups, and carriers                                      | Phosphomethylpyrimidine kinase (EC 2.7.4.7) Hydroxymethylpyrimidine kinase (EC 2.7.1.49)     | 0,428 | 0,009 | 0,752 | 0,116 | 0,341 | 0,039 |
| 1029837 | COG2145H      | gbs0859 |        | Metabolism and transport        | Cofactors, prosthetic groups, and carriers                                      | Hydroxyethylthiazole kinase (EC 2.7.1.50)                                                    | 0,539 | 0,035 | 0,750 | 0,062 | 0,442 | 0,060 |
| 1029839 | COG0352H      | gbs0860 |        | Metabolism and transport        | Cofactors, prosthetic groups, and carriers                                      | Thiamin-phosphate pyrophosphatase (EC 2.5.1.3)                                               | 0,482 | 0,029 | 0,818 | 0,223 | 0,732 | 0,177 |
| 1029841 | COG0766M      | gbs0861 | murZ   | Cell Envelope                   | Biosynthesis and degradation of murein sacculus and peptidoglycan               | UDP-N-acetylglucosamine 1-carboxyvinyltransferase (EC 2.5.1.7)                               | 0,845 | 0,002 | 1,342 | 0,002 | 1,281 | 0,186 |
| 1029840 | COG1670J      | gbs0862 |        | Cellular processes              | Translation, ribosomal structure and biogenesis                                 | Ribosomal-protein-S5-alanine acetyltransferase (EC 2.3.1.128)                                | 1,101 | 0,191 | 0,978 | 0,705 | 1,455 | 0,022 |
| 1029848 | COG4109K      | gbs0863 |        | Cellular processes              | Transcription                                                                   | Cytosolic protein containing multiple CBS domains                                            | 0,974 | 0,754 | 1,072 | 0,393 | 1,435 | 0,008 |
| 1029845 | COG0024J      | gbs0864 | map    | Cellular processes              | Translation, ribosomal structure and biogenesis                                 | Methionine aminopeptidase (EC 3.4.11.18)                                                     | 0,974 | 0,653 | 1,109 | 0,163 | 1,380 | 0,007 |
| 1029846 | COG1295S      | gbs0865 |        | Cellular processes              | Transcription                                                                   | Ribonuclease BN (EC 3.1.-)                                                                   | 1,053 | 0,348 | 1,258 | 0,010 | 1,410 | 0,016 |
| 1029847 | COG2246S      | gbs0866 |        | General function predicted only |                                                                                 | Bactoprenol-linked monosaccharide translocase (flippase type)                                | 1,260 | 0,006 | 0,987 | 0,923 | 0,407 | 0,028 |
| 1029842 | COG4708S      | gbs0867 |        | Hypothetical                    |                                                                                 | Hypothetical membrane spanning protein                                                       | 1,103 | 0,098 | 1,962 | 0,001 | 5,190 | 0,002 |
| 1029844 | COG0272L      | gbs0868 | lig    | Cellular processes              | DNA replication, recombination and repair                                       | NAD-dependent DNA ligase (EC 6.5.1.2)                                                        | 0,754 | 0,002 | 0,844 | 0,002 | 0,612 | 0,010 |
| 1029843 | COG1597R      | gbs0869 |        | Metabolism and transport        | Fatty acid and phospholipids                                                    | Diacylglycerol kinase family protein                                                         | 0,675 | 0,008 | 0,790 | 0,009 | 0,589 | 0,002 |
| 1029853 | COG1523G      | gbs0870 |        | Metabolism and transport        | Carbohydrates, organic alcohols, and acids                                      | Pullulanase (EC 3.2.1.41)                                                                    | 0,680 | 0,002 | 0,826 | 0,009 | 0,612 | 0,000 |
| 1029852 | COG0296G      | gbs0871 |        | Metabolism and transport        | Carbohydrates, organic alcohols, and acids                                      | 1,4-alpha-glucan branching enzyme (EC 2.4.1.18)                                              | 1,836 | 0,015 | 0,726 | 0,047 | 3,572 | 0,001 |
| 1029849 | COG0448G      | gbs0872 | glgC   | Metabolism and transport        | Carbohydrates, organic alcohols, and acids                                      | Glucose-1-phosphate adenylyltransferase catalytic subunit (EC 2.7.7.27)                      | 2,531 | 0,015 | 0,624 | 0,004 | 3,124 | 0,000 |
| 1029851 | COG0448G      | gbs0873 |        | Metabolism and transport        | Carbohydrates, organic alcohols, and acids                                      | Glucose-1-phosphate adenylyltransferase regulatory subunit (EC 2.7.7.27)                     | 2,456 | 0,007 | 0,611 | 0,007 | 3,631 | 0,002 |
| 1029850 | COG0297G      | gbs0874 |        | Metabolism and transport        | Carbohydrates, organic alcohols, and acids                                      | Glycogen synthase (EC 2.4.1.21)                                                              | 2,681 | 0,002 | 0,568 | 0,000 | 2,175 | 0,001 |
| 1029854 | -             | gbs0875 | atpE   | Metabolism and transport        | Energy production and conversion                                                | ATP synthase C chain (EC 3.6.3.14)                                                           | 0,965 | 0,403 | 1,073 | 0,203 | 3,091 | 0,003 |
| 1029856 | -             | gbs0876 | atpB   | Metabolism and transport        | Energy production and conversion                                                | ATP synthase A chain (EC 3.6.3.14)                                                           | 0,847 | 0,061 | 1,050 | 0,425 | 2,443 | 0,000 |
| 1029857 | COG0711C      | gbs0877 | atpF   | Metabolism and transport        | Energy production and conversion                                                | ATP synthase B chain (EC 3.6.3.14)                                                           | 0,992 | 0,853 | 1,097 | 0,189 | 1,955 | 0,000 |
| 1029859 | COG0712C      | gbs0878 | atpH   | Metabolism and transport        | Energy production and conversion                                                | ATP synthase delta chain (EC 3.6.3.14)                                                       | 0,991 | 0,653 | 1,078 | 0,110 | 2,630 | 0,002 |
| 1029855 | COG0056C      | gbs0879 | atpA   | Metabolism and transport        | Energy production and conversion                                                | ATP synthase alpha chain (EC 3.6.3.14)                                                       | 0,830 | 0,028 | 1,042 | 0,434 | 2,967 | 0,000 |
| 1029865 | COG0224C      | gbs0880 | atpG   | Metabolism and transport        | Energy production and conversion                                                | ATP synthase gamma chain (EC 3.6.3.14)                                                       | 0,901 | 0,121 | 1,082 | 0,114 | 3,336 | 0,000 |
| 1029858 | COG0055C      | gbs0881 | atpD   | Metabolism and transport        | Energy production and conversion                                                | ATP synthase beta chain (EC 3.6.3.14)                                                        | 0,847 | 0,024 | 1,052 | 0,369 | 3,436 | 0,000 |
| 1029863 | -             | gbs0882 | atpC   | Metabolism and transport        | Energy production and conversion                                                | ATP synthase epsilon chain (EC 3.6.3.14)                                                     | 0,884 | 0,043 | 1,068 | 0,083 | 2,242 | 0,000 |
| 1029866 | COG0766M      | gbs0883 | murA   | Cell Envelope                   | Biosynthesis and degradation of murein sacculus and peptidoglycan               | UDP-N-acetylglucosamine 1-carboxyvinyltransferase (EC 2.5.1.7)                               | 1,057 | 0,183 | 1,287 | 0,003 | 2,159 | 0,015 |
| 1029867 | -             | gbs0884 | epuA   | General function predicted only |                                                                                 | EpuA protein                                                                                 | 1,489 | 0,010 | 1,610 | 0,008 | 1,534 | 0,129 |
| 1029861 | -             | gbs0885 | endA   | Cellular processes              | DNA transformation                                                              | DNA-entry nuclease (EC 3.1.30.-)                                                             | 0,967 | 0,448 | 1,530 | 0,022 | 2,415 | 0,002 |
| 1029860 | COG0016J      | gbs0886 | pheS   | Cellular processes              | Translation, ribosomal structure and biogenesis                                 | Phenylalanyl-tRNA synthetase alpha chain (EC 6.1.1.20)                                       | 0,617 | 0,002 | 0,906 | 0,069 | 7,527 | 0,008 |
| 1029864 | -             | gbs0887 | pheT   | Metabolism and transport        | Central intermediary metabolism                                                 | Acetyltransferase, GNAT family                                                               | 0,601 | 0,010 | 0,912 | 0,065 | 8,062 | 0,001 |
| 1029872 | COG0072J, COG | gbs0888 | pheT   | Cellular processes              | Translation, ribosomal structure and biogenesis                                 | Phenylalanyl-tRNA synthetase beta chain (EC 6.1.1.20)                                        | 0,468 | 0,003 | 0,764 | 0,102 | 1,962 | 0,065 |
| 1029871 | COG3857L      | gbs0889 | rexB   | Cellular processes              | DNA replication, recombination and repair                                       | ATP-dependent nuclease subunit B                                                             | 1,207 | 0,054 | 0,944 | 0,348 | 1,915 | 0,000 |
| 1029875 | COG1074L      | gbs0891 | rexA   | Cellular processes              | DNA replication, recombination and repair                                       | ATP-dependent nuclease subunit A                                                             | 1,155 | 0,106 | 0,923 | 0,102 | 1,517 | 0,016 |
| 1029873 | COG0598P      | gbs0892 |        | Metabolism and transport        | Inorganic ion transport and metabolism                                          | Magnesium and cobalt transport protein corA                                                  | 0,977 | 0,560 | 0,786 | 0,019 | 1,697 | 0,006 |
| 1029874 | COG0486R      | gbs0893 | thdF   | Cellular processes              | Translation, ribosomal structure and biogenesis                                 | lRNA (5-carboxymethylaminomethyl-2-thiouridylyl) synthase                                    | 1,174 | 0,098 | 1,317 | 0,002 | 1,141 | 0,366 |
| 1029870 | COG0488R      | gbs0894 |        | Transport and binding proteins  | Unknown substrate                                                               | ABC transporter ATP-binding protein                                                          | 0,858 | 0,032 | 0,894 | 0,073 | 0,796 | 0,010 |
| 1029869 | COG1071C      | gbs0895 | acoA   | Metabolism and transport        | Energy production and conversion                                                | Pyruvate dehydrogenase E1 component alpha subunit (EC 1.2.4.1)                               | 1,062 | 0,578 | 1,046 | 0,566 | 0,870 | 0,129 |
| 1029878 | COG0022C      | gbs0896 | acoB   | Metabolism and transport        | Energy production and conversion                                                | Pyruvate dehydrogenase E1 component beta subunit (EC 1.2.4.1)                                | 1,118 | 0,214 | 1,129 | 0,032 | 0,750 | 0,021 |
| 1029876 | COG0508C      | gbs0897 | acoC   | Metabolism and transport        | Energy production and conversion                                                | Dihydroliipoamide acetyltransferase component of pyruvate dehydrogenase complex (EC 2.3.1.-) | 1,055 | 0,587 | 1,088 | 0,313 | 0,616 | 0,019 |
| 1029879 | COG1249C      | gbs0898 | acoL   | Metabolism and transport        | Energy production and conversion                                                | Dihydroliipoamide dehydrogenase (EC 1.8.1.4)                                                 | 0,943 | 0,212 | 1,122 | 0,000 | 0,723 | 0,017 |
| 1029885 | COG0095H      | gbs0899 | lpIB   | Metabolism and transport        | Cofactors, prosthetic groups, and carriers                                      | Lipoate-protein ligase A (EC 6.3.2.-)                                                        | 0,508 | 0,004 | 0,860 | 0,004 | 0,382 | 0,043 |
| 1029877 | COG3442R      | gbs0900 |        | General function predicted only |                                                                                 | CobB CobQ-like glutamine amidotransferase domain                                             | 1,227 | 0,007 | 1,412 | 0,006 | 0,604 | 0,003 |
| 1029887 | COG0769M      | gbs0901 |        | Cell Envelope                   | Biosynthesis and degradation of murein sacculus and peptidoglycan               | UDP-N-acetylmuramoylalanine-D-glutamate-2,6-diaminopimelate ligase (EC 6.3.2.13)             | 0,091 | 0,016 | 1,345 | 0,004 | 0,611 | 0,027 |
| 1029881 | -             | gbs0902 |        | Hypothetical                    |                                                                                 | Hypothetical membrane spanning protein                                                       | 0,945 | 0,214 | 1,015 | 0,795 | 0,795 | 0,032 |
| 1029884 | COG4856S      | gbs0903 |        | Hypothetical                    |                                                                                 | Hypothetical membrane associated protein                                                     | 1,036 | 0,242 | 1,030 | 0,208 | 0,460 | 0,007 |
| 1029882 | COG1109G      | gbs0904 | femD   | Metabolism and transport        | Carbohydrates, organic alcohols, and acids                                      | Phosphoglucosamine mutase (EC 5.4.2.10)                                                      | 1,056 | 0,074 | 1,099 | 0,020 | 0,481 | 0,001 |
| 1029890 | COG3272S      | gbs0905 |        | Hypothetical                    |                                                                                 | Hypothetical protein                                                                         | 1,646 | 0,100 | 1,334 | 0,037 | 1,058 | 0,697 |
| 1029886 | -             | gbs0906 |        | Hypothetical                    |                                                                                 | Hypothetical protein                                                                         | 1,197 | 0,046 | 1,193 | 0,153 | 2,069 | 0,000 |
| 1029883 | COG0635H      | gbs0907 | hemN   | Metabolism and transport        | Cofactors, prosthetic groups, and carriers                                      | Oxygen-independent coproporphyrinogen-III oxidase (EC 1.3.99.22)                             | 0,731 | 0,001 | 0,786 | 0,037 | 1,114 | 0,486 |
| 1029889 | COG3884I      | gbs0908 |        | Metabolism and transport        | Fatty acid and phospholipids                                                    | Acyl-lacyl-carrier-protein hydrolase (EC 3.1.2.14)                                           | 0,606 | 0,004 | 0,797 | 0,073 | 0,850 | 0,436 |
| 1029888 | COG0647G      | gbs0909 |        | Metabolism and transport        | Carbohydrates, organic alcohols, and acids                                      | Haloacid dehalogenase-like hydrolase                                                         | 0,766 | 0,004 | 0,930 | 0,067 | 1,200 | 0,304 |
| 1029895 | -             | gbs0910 |        | Hypothetical                    |                                                                                 |                                                                                              |       |       |       |       |       |       |

|         |           |          |          |                                      |                                                              |                                                                               |       |       |       |       |       |       |
|---------|-----------|----------|----------|--------------------------------------|--------------------------------------------------------------|-------------------------------------------------------------------------------|-------|-------|-------|-------|-------|-------|
| 1029896 | COG0481M  | gbs0917  | lepA     | General function predicted only      | GTP-binding protein lepA                                     | 0.869                                                                         | 0.019 | 0.859 | 0.036 | 0.600 | 0.087 |       |
| 1029899 | COG4896S  | gbs0918  | iniA/bir | Cellular processes                   | Toxin production and resistance                              | Internalin protein                                                            | 0.639 | 0.047 | 0.628 | 0.055 | 0.829 | 0.482 |
| 1029902 | COG1418R  | gbs0919  |          | Cellular processes                   | Toxin production and resistance                              | Metal dependent hydrolase                                                     | 1.733 | 0.000 | 1.794 | 0.002 | 0.836 | 0.403 |
| 1029898 | -         | gbs0920  |          | Metabolism and transport             | Central intermediary metabolism                              | Acetyltransferase (EC 2.3.1.-)                                                | 1.859 | 0.003 | 1.808 | 0.003 | 0.726 | 0.233 |
| 1029905 | -         | gbs0921  | msrB     | Cellular processes                   | Posttranslational modification, protein turnover, chaperones | Peptide methionine sulfoxide reductase msrB (EC 1.8.4.6)                      | 1.804 | 0.000 | 1.527 | 0.000 | 1.092 | 0.332 |
| 1029904 | COG0474P  | gbs0922  |          | Metabolism and transport             | Inorganic ion transport and metabolism                       | Calcium-transporting ATPase (EC 3.6.3.8)                                      | 2.318 | 0.001 | 2.014 | 0.028 | 1.103 | 0.053 |
| 1029903 | -         | gbs0923  |          | Metabolism and transport             | Fatty acid and phospholipids                                 | Lipase                                                                        | 1.755 | 0.000 | 1.781 | 0.013 | 0.999 | 0.975 |
| 1029901 | COG0110R  | gbs0924  |          | General function predicted only      |                                                              | O-acetyltransferase (EC 2.3.1.-)                                              | 0.548 | 0.000 | 0.322 | 0.001 | 0.976 | 0.878 |
| 1029906 | COG0398S  | gbs0925  |          | General function predicted only      |                                                              | Putative membrane-associated alkaline phosphatase                             | 1.445 | 0.001 | 1.305 | 0.037 | 0.906 | 0.368 |
| 1029908 | -         | gbs0926  |          | Transport and binding proteins       | Unknown substrate                                            | ABC transporter permease protein                                              | 1.129 | 0.003 | 1.139 | 0.060 | 0.897 | 0.277 |
| 1029912 | COG1131V  | gbs0927  |          | Transport and binding proteins       | Unknown substrate                                            | ABC transporter ATP-binding protein                                           | 1.743 | 0.012 | 1.419 | 0.016 | 0.611 | 0.138 |
| 1029907 | COG1725K  | gbs0928  |          | Cellular processes                   | Transcription                                                | Transcriptional regulator, GntR family                                        | 1.531 | 0.000 | 1.233 | 0.022 | 0.702 | 0.079 |
| 1029916 | COG0587L  | gbs0929  | dnaE     | Cellular processes                   | DNA replication, recombination and repair                    | DNA polymerase III alpha subunit (EC 2.7.7.7)                                 | 0.900 | 0.160 | 0.905 | 0.181 | 1.652 | 0.005 |
| 1029911 | COG0205G  | gbs0930  | pfkA     | Metabolism and transport             | Carbohydrates, organic alcohols, and acids                   | 6-phosphofructokinase (EC 2.7.1.11)                                           | 0.781 | 0.008 | 0.985 | 0.526 | 1.042 | 0.470 |
| 1029910 | -         | gbs0931  | pyk      | Metabolism and transport             | Energy production and conversion                             | Pyruvate kinase (EC 2.7.1.40)                                                 | 0.805 | 0.016 | 0.974 | 0.481 | 0.874 | 0.468 |
| 1029917 | -         | gbs0932  | sipC     | Cellular processes                   | Posttranslational modification, protein turnover, chaperones | Signal peptidase I (EC 3.4.21.89)                                             | 0.978 | 0.631 | 0.822 | 0.020 | 1.844 | 0.006 |
| 1029918 | COG0449M  | gbs0933  | glmS     | Metabolism and transport             | Amino acids, peptides, aminosugars and amines                | Glucosamine-fructose-6-phosphate aminotransferase [isomerizing] (EC 2.6.1.16) | 0.908 | 0.152 | 2.028 | 0.001 | 5.324 | 0.005 |
| 1029915 | COG2824P  | gbs0934  |          | Metabolism and transport             | Inorganic ion transport and metabolism                       | PhnA protein                                                                  | 0.764 | 0.020 | 1.668 | 0.010 | 2.129 | 0.137 |
| 1029909 | COG0765E  | gbs0935  |          | Metabolism and transport             | Amino acids, peptides, aminosugars and amines                | Histidine transport system permease protein hisM                              | 1.260 | 0.041 | 1.292 | 0.012 | 1.678 | 0.131 |
| 1029913 | COG1126E  | gbs0936  |          | Metabolism and transport             | Amino acids, peptides, aminosugars and amines                | Histidine transport ATP-binding protein hisP                                  | 1.151 | 0.161 | 1.341 | 0.002 | 5.991 | 0.028 |
| 1029921 | COG0834E  | gbs0937  |          | Metabolism and transport             | Amino acids, peptides, aminosugars and amines                | Histidine-binding protein                                                     | 1.074 | 0.555 | 1.300 | 0.008 | 2.449 | 0.014 |
| 1029920 | COG0268J  | gbs0938  | rpsT     | Cellular processes                   | Translation, ribosomal structure and biogenesis              | SSU ribosomal protein S20P                                                    | 0.969 | 0.194 | 1.261 | 0.015 | 0.874 | 0.452 |
| 1029914 | COG1072H  | gbs0939  | coaA     | Metabolism and transport             | Cofactors, prosthetic groups, and carriers                   | Pantothenate kinase (EC 2.7.1.33)                                             | 1.063 | 0.255 | 1.029 | 0.705 | 1.452 | 0.042 |
| 1029926 | COG2813J  | gbs0940  |          | Cellular processes                   | Translation, ribosomal structure and biogenesis              | 16S rRNA m(2)G 1207 methyltransferase (EC 2.1.1.52)                           | 0.548 | 0.001 | 0.762 | 0.014 | 0.510 | 0.070 |
| 1029919 | COG0295F  | gbs0941  | cdd      | Metabolism and transport             | Purines, pyrimidines, nucleosides, and nucleotides           | Cytidine deaminase (EC 3.5.4.5)                                               | 0.864 | 0.007 | 0.638 | 0.000 | 0.626 | 0.028 |
| 1029925 | COG1744R  | gbs0942  |          | Metabolism and transport             | Purines, pyrimidines, nucleosides, and nucleotides           | Nucleoside-binding protein                                                    | 0.998 | 0.762 | 0.851 | 0.002 | 0.830 | 0.015 |
| 1029922 | COG3845R  | gbs0943  |          | Metabolism and transport             | Purines, pyrimidines, nucleosides, and nucleotides           | Nucleoside transport ATP-binding protein                                      | 0.569 | 0.000 | 0.547 | 0.001 | 1.361 | 0.007 |
| 1029930 | COG4603R  | gbs0944  |          | Metabolism and transport             | Purines, pyrimidines, nucleosides, and nucleotides           | Nucleoside transport system permease protein                                  | 0.576 | 0.000 | 0.588 | 0.005 | 1.481 | 0.008 |
| 1029927 | COG1079R  | gbs0945  |          | Metabolism and transport             | Purines, pyrimidines, nucleosides, and nucleotides           | Nucleoside transport system permease protein                                  | 0.548 | 0.000 | 0.599 | 0.003 | 1.219 | 0.053 |
| 1029923 | COG0446R  | gbs0946  | nox      | Metabolism and transport             | Energy production and conversion                             | NADH oxidase H2O-forming (EC 1.6.-)                                           | 1.138 | 0.114 | 1.511 | 0.000 | 1.452 | 0.123 |
| 1029928 | COG0039C  | gbs0947  | ldh      | Metabolism and transport             | Energy production and conversion                             | L-lactate dehydrogenase (EC 1.1.1.27)                                         | 0.894 | 0.076 | 0.994 | 0.927 | 0.438 | 0.041 |
| 1029931 | COG0188L  | gbs0948  | gyrA     | Cellular processes                   | DNA replication, recombination and repair                    | DNA gyrase subunit A (EC 5.99.1.3)                                            | 0.799 | 0.005 | 0.825 | 0.046 | 2.664 | 0.003 |
| 1029933 | COG3764M  | gbs0949  | sortA    | Cellular processes                   | Posttranslational modification, protein turnover, chaperones | Sortase                                                                       | 0.816 | 0.001 | 0.884 | 0.002 | 2.707 | 0.000 |
| 1029924 | COG0346E  | gbs0950  |          | Metabolism and transport             | Amino acids, peptides, aminosugars and amines                | Glyoxalase family protein                                                     | 0.919 | 0.028 | 0.958 | 0.253 | 2.192 | 0.004 |
| 1029939 | COG4086S  | gbs0951  |          | Hypothetical                         |                                                              | Hypothetical exported protein                                                 | 2.383 | 0.000 | 1.204 | 0.261 | 1.015 | 0.941 |
| 1029932 | COG0475P  | gbs0952  |          | Metabolism and transport             | Inorganic ion transport and metabolism                       | Na+ H+ antiporter napA                                                        | 0.992 | 0.917 | 1.389 | 0.028 | 3.275 | 0.017 |
| 1029936 | COG0518F  | COG05953 | guaA     | Metabolism and transport             | Purines, pyrimidines, nucleosides, and nucleotides           | GMP synthase [glutamine-hydrolyzing] (EC 6.3.5.2)                             | 0.821 | 0.012 | 0.996 | 0.891 | 1.303 | 0.163 |
| 1029934 | COG2188K  | gbs0954  |          | Cellular processes                   | Transcription                                                | Transcriptional regulator, GntR family                                        | 0.963 | 0.564 | 1.123 | 0.011 | 0.810 | 0.156 |
| 1029944 | COG1206J  | gbs0955  | gid      | Cellular processes                   | Translation, ribosomal structure and biogenesis              | Glucose inhibited division protein A                                          | 0.997 | 0.884 | 1.069 | 0.048 | 0.997 | 0.963 |
| 1029935 | -         | gbs0956  |          | Metabolism and transport             | Central intermediary metabolism                              | Acetyltransferase (EC 2.3.1.-)                                                | 0.780 | 0.003 | 0.724 | 0.019 | 0.643 | 0.013 |
| 1029942 | COG1464P  | gbs0957  |          | Transport and binding proteins       | Unknown substrate                                            | ABC transporter substrate-binding protein                                     | 0.684 | 0.000 | 0.801 | 0.016 | 0.689 | 0.029 |
| 1029943 | -         | gbs0958  |          | Hypothetical                         |                                                              | Hypothetical protein                                                          | 2.868 | 0.000 | 3.619 | 0.000 | 1.327 | 0.188 |
| 1029945 | COG0793M  | gbs0959  |          | Cellular processes                   | Toxin production and resistance                              | Nisin-resistance protein                                                      | 1.164 | 0.316 | 1.414 | 0.017 | 0.706 | 0.006 |
| 1029937 | COG1136V  | gbs0961  |          | Transport and binding proteins       | Unknown substrate                                            | ABC transporter ATP-binding protein                                           | 1.644 | 0.027 | 1.387 | 0.014 | 0.700 | 0.070 |
| 1029948 | -         | gbs0962  | salY     | Transport and binding proteins       | Unknown substrate                                            | ABC transporter permease protein                                              | 2.002 | 0.003 | 1.611 | 0.019 | 0.510 | 0.005 |
| 1029949 | COG0745TK | gbs0963  |          | Cellular processes                   | Signal transduction                                          | Two-component response regulator                                              | 1.544 | 0.000 | 1.450 | 0.010 | 0.918 | 0.095 |
| 1029955 | COG0642T  | gbs0964  |          | Cellular processes                   | Signal transduction                                          | Two-component sensor histidine kinase (EC 2.7.3.-)                            | 1.374 | 0.001 | 1.457 | 0.001 | 1.024 | 0.795 |
| 1029941 | COG0582L  | gbs0965  | xerD     | Cellular processes                   | DNA replication, recombination and repair                    | Integrase recombinase xerD                                                    | 1.048 | 0.573 | 0.840 | 0.274 | 0.868 | 0.538 |
| 1029954 | COG4166E  | gbs0966  |          | Metabolism and transport             | Amino acids, peptides, aminosugars and amines                | Oligopeptide-binding protein oppA                                             | 1.452 | 0.003 | 1.936 | 0.044 | 0.977 | 0.876 |
| 1029950 | -         | gbs0967  | satE     | Hypothetical                         |                                                              | Hypothetical protein                                                          | 1.355 | 0.014 | 1.042 | 0.744 | 1.585 | 0.065 |
| 1029951 | -         | gbs0968  | satD     | Hypothetical                         |                                                              | Hypothetical protein                                                          | 1.244 | 0.069 | 0.952 | 0.721 | 1.409 | 0.043 |
| 1029969 | COG3505U  | gbs0983  |          | General function predicted only      |                                                              | ATPASE VIRD4 HOMOLOG                                                          | 0.828 | 0.037 | 1.440 | 0.003 | 0.859 | 0.378 |
| 1029974 | -         | gbs0984  |          | Hypothetical                         |                                                              | Hypothetical protein                                                          | 0.949 | 0.707 | 1.275 | 0.064 | 1.401 | 0.048 |
| 1029971 | COG0629L  | gbs0985  |          | Hypothetical                         |                                                              | Hypothetical protein                                                          | 1.025 | 0.745 | 2.500 | 0.010 | 2.958 | 0.000 |
| 1029973 | -         | gbs0987  |          | Hypothetical                         |                                                              | Hypothetical protein                                                          | 0.777 | 0.026 | 2.158 | 0.037 | 3.237 | 0.010 |
| 1029975 | -         | gbs0988  |          | Cell Envelope                        | Other                                                        | M protein                                                                     | 0.811 | 0.069 | 1.955 | 0.007 | 1.945 | 0.003 |
| 1029982 | -         | gbs0989  |          | Hypothetical                         |                                                              | Hypothetical protein                                                          | 0.887 | 0.267 | 1.619 | 0.006 | 2.759 | 0.000 |
| 1029968 | -         | gbs0990  |          | Hypothetical                         |                                                              | Hypothetical protein                                                          | 0.701 | 0.015 | 1.665 | 0.001 | 3.130 | 0.011 |
| 1029976 | COG0542O  | gbs0991  |          | Cellular processes                   | DNA replication, recombination and repair                    | DNA topoisomerase III (EC 5.99.1.2)                                           | 0.573 | 0.004 | 1.566 | 0.046 | 3.244 | 0.007 |
| 1029977 | COG0550L  | gbs0992  |          | General function predicted only      |                                                              | LtrC-like protein                                                             | 0.829 | 0.034 | 1.809 | 0.005 | 1.840 | 0.194 |
| 1029981 | -         | gbs0993  |          | Hypothetical                         |                                                              | Hypothetical protein                                                          | 0.683 | 0.009 | 1.998 | 0.022 | 1.308 | 0.083 |
| 1029972 | -         | gbs0994  |          | Hypothetical                         |                                                              | Hypothetical cytosolic protein                                                | 1.057 | 0.531 | 1.580 | 0.006 | 1.274 | 0.104 |
| 1029986 | -         | gbs0995  |          | Hypothetical                         |                                                              | Hypothetical protein                                                          | 1.140 | 0.166 | 1.747 | 0.003 | 1.451 | 0.122 |
| 1029980 | -         | gbs0996  |          | Mobile and extrachromosomal elements |                                                              | DNA-entry nuclease (EC 3.1.30.-)                                              | 1.036 | 0.732 | 1.892 | 0.008 | 1.330 | 0.074 |
| 1029985 | -         | gbs0997  |          | Hypothetical                         |                                                              | Hypothetical protein                                                          | 1.113 | 0.163 | 1.713 | 0.013 | 1.661 | 0.030 |
| 1029984 | -         | gbs0998  |          | Hypothetical                         |                                                              | Hypothetical protein                                                          | 1.060 | 0.568 | 2.295 | 0.003 | 1.998 | 0.008 |
| 1029991 | -         | gbs0999  |          | Hypothetical                         |                                                              | Hypothetical protein                                                          | 1.268 | 0.078 | 1.976 | 0.000 | 2.627 | 0.007 |
| 1029989 | -         | gbs1002  |          | Hypothetical                         |                                                              | Hypothetical protein                                                          | 1.044 | 0.436 | 1.196 | 0.005 | 1.526 | 0.000 |
| 1029997 | -         | gbs1003  |          | Hypothetical                         |                                                              | Hypothetical protein                                                          | 0.967 | 0.608 | 1.015 | 0.758 | 1.341 | 0.001 |
| 1029987 | -         | gbs1004  |          | Hypothetical                         |                                                              | Hypothetical protein                                                          | 1.090 | 0.498 | 1.334 | 0.006 | 1.025 | 0.902 |
| 1029990 | -         | gbs1005  |          | Hypothetical                         |                                                              | Hypothetical protein                                                          | 0.793 | 0.100 | 1.271 | 0.387 | 2.476 | 0.024 |
| 1030009 | COG0541U  | gbs1017  | ffh      | Cellular processes                   | Posttranslational modification, protein turnover, chaperones | SIGNAL RECOGNITION PARTICLE, SUBUNIT FFH SRP54                                | 1.167 | 0.189 | 1.113 | 0.169 | 0.765 | 0.225 |
| 1030013 | COG2739S  | gbs1018  | ylxM     | General function predicted only      |                                                              | Signal recognition particle associated protein                                | 1.111 | 0.062 | 1.144 | 0.006 | 0.821 | 0.144 |
| 1030010 | COG0642T  | gbs1019  | ciaH     | Cellular processes                   | Signal transduction                                          | Sensor protein ciaH (EC 2.7.3.-)                                              | 1.518 | 0.000 | 1.209 | 0.006 | 1.171 | 0.047 |
| 1030007 | COG0745TK | gbs1020  | ciaR     | Cellular processes                   | Transcription                                                | Transcriptional regulatory protein ciaR                                       | 1.615 | 0.000 | 1.257 | 0.003 | 1.099 | 0.285 |
| 1030012 | COG0308E  | gbs1021  | pepN     | Metabolism and transport             | Amino acids, peptides, aminosugars and amines                | Aminopeptidase N (EC 3.4.11.15)                                               | 1.235 | 0.001 | 1.481 | 0.000 | 2.296 | 0.005 |
| 1030011 | COG0704P  | gbs1022  | phoU     | Metabolism and transport             | Inorganic ion transport and metabolism                       | Phosphate transport system protein phoU                                       | 0.986 | 0.794 | 1.344 | 0.026 | 1.039 | 0.805 |
| 1030014 | COG1117P  | gbs1023  | pstB     | Metabolism and transport             | Inorganic ion transport and metabolism                       | Phosphate transport ATP-binding protein pstB                                  | 0.789 | 0.000 | 1.254 | 0.001 | 1.206 | 0.048 |
| 1030019 | COG1117P  | gbs1024  | pstB2    | Metabolism and transport             | Inorganic ion transport and metabolism                       | Phosphate transport ATP-binding protein pstB                                  | 0.910 | 0.152 | 1.366 | 0.021 | 1.128 | 0.513 |
| 1030016 | COG0581P  | gbs1025  | pstA     | Metabolism and transport             | Inorganic ion transport and metabolism                       | Phosphate transport system permease protein pstA                              | 0.664 | 0.008 | 1.291 | 0.003 | 1.189 | 0.433 |
| 1030015 | COG0573P  | gbs1026  | pstC     | Metabolism and transport             | Inorganic ion transport and metabolism                       | Phosphate transport system permease protein pstC                              | 0.790 | 0.002 | 1.249 | 0.053 | 1.622 | 0.017 |
| 1030018 | COG0226P  | gbs1027  | pstS     | Metabolism and transport             | Inorganic ion transport and metabolism                       | Phosphate-binding protein                                                     | 0.787 | 0.005 | 1.200 | 0.012 | 1.000 | 0.999 |
| 1030020 | COG0144J  | COG01028 |          | Cellular processes                   | Translation, ribosomal structure and biogenesis              | Putative 23S rRNA m(5)C methyltransferase (EC 2.1.1.-)                        | 0.825 | 0.065 | 0.773 | 0.002 | 1.090 | 0.345 |
| 1030022 | COG0483G  | gbs1029  |          | Metabolism and transport             | Carbohydrates, organic alcohols, and acids                   | Myo-inositol-1(or 4)-monophosphatase (EC 3.1.3.25)                            | 0.872 | 0.039 | 0.997 | 0.962 | 1.272 | 0.028 |
| 1030031 | -         | gbs1030  |          | Hypothetical                         |                                                              | Hypothetical cytosolic protein                                                | 0.854 | 0.016 | 0.956 | 0.285 | 1.107 | 0.421 |
| 1030028 | COG1393P  | gbs1031  | spxA     | Metabolism and transport             | Inorganic ion transport and metabolism                       | Arsenate reductase family protein                                             | 0.852 | 0.051 | 0.842 | 0.004 | 1.132 | 0.357 |
| 1030029 | COG0196H  | gbs1032  | mreA     | Metabolism and transport             | Cofactors, prosthetic groups, and carriers                   | Riboflavin kinase (EC 2.7.1.26) FMN adenylyltransferase (EC 2.7.7.2)          | 1.042 | 0.336 | 1.203 | 0.055 | 0.982 | 0.862 |
| 1030025 | COG0130J  | gbs1033  | truB     | Cellular processes                   | Translation, ribosomal structure and biogenesis              | IRNA pseudouridine synthase B (EC 4.2.1.70)                                   | 1.085 | 0.159 | 1.111 | 0.042 | 0.819 | 0.276 |
| 1030026 | -         | gbs1034  |          | Metabolism and transport             | Central intermediary metabolism                              | Acetyltransferase (EC 2.3.1.-)                                                | 0.950 | 0.087 | 0.934 | 0.132 | 0.559 | 0.003 |
| 1030024 | COG4487S  | gbs1035  |          | Hypothetical                         |                                                              | Hypothetical protein                                                          | 1.136 | 0.117 | 1.015 | 0.873 | 0.514 | 0.036 |
| 1030034 | COG0732V  | gbs1036  |          | Mobile and extrachromosomal elements |                                                              | Type I restriction-modification system specificity subunit                    | 0.971 | 0.    |       |       |       |       |

|         |           |         |       |                                      |                                                              |                                                                                        |       |       |       |       |       |       |
|---------|-----------|---------|-------|--------------------------------------|--------------------------------------------------------------|----------------------------------------------------------------------------------------|-------|-------|-------|-------|-------|-------|
| 1030036 | COG0577V  | gbs1038 |       | Transport and binding proteins       | Unknown substrate                                            | ABC transporter permease protein                                                       | 0.868 | 0.076 | 0.727 | 0.028 | 0.878 | 0.203 |
| 1030033 | COG1136V  | gbs1039 |       | Transport and binding proteins       | Unknown substrate                                            | ABC transporter ATP-binding protein                                                    | 0.875 | 0.176 | 0.685 | 0.089 | 0.639 | 0.026 |
| 1030032 | COG0550L  | COG1040 |       | Cellular processes                   | DNA replication, recombination and repair                    | DNA topoisomerase I (EC 5.99.1.2)                                                      | 1.277 | 0.001 | 1.289 | 0.013 | 1.421 | 0.011 |
| 1030038 | COG0758LU | gbs1041 | smf   | Cellular processes                   | DNA replication, recombination and repair                    | DNA processing protein                                                                 | 0.214 | 0.020 | 1.587 | 0.253 | 0.429 | 0.222 |
| 1030041 | COG4607P  | gbs1042 |       | Metabolism and transport             | Inorganic ion transport and metabolism                       | Ferric anguibactin-binding protein                                                     | 0.581 | 0.000 | 0.646 | 0.023 | 1.311 | 0.054 |
| 1030035 | COG4604P  | gbs1043 |       | Metabolism and transport             | Inorganic ion transport and metabolism                       | Ferric anguibactin transport ATP-binding protein                                       | 0.470 | 0.001 | 0.493 | 0.000 | 2.036 | 0.039 |
| 1030043 | COG4605P  | gbs1044 |       | Metabolism and transport             | Inorganic ion transport and metabolism                       | Ferric anguibactin transport system permease protein fatC                              | 0.469 | 0.000 | 0.469 | 0.000 | 1.586 | 0.099 |
| 1030042 | COG4606P  | gbs1045 |       | Metabolism and transport             | Inorganic ion transport and metabolism                       | Ferric anguibactin transport system permease protein fatD                              | 0.471 | 0.000 | 0.470 | 0.001 | 1.202 | 0.177 |
| 1030040 | COG0110R  | gbs1046 |       | Metabolism and transport             | Fatty acid and phospholipids                                 | O-acetyltransferase (cell wall biosynthesis) (EC 2.3.1.-)                              | 0.708 | 0.001 | 0.818 | 0.012 | 0.931 | 0.689 |
| 1030046 | COG0164L  | gbs1047 | mhB   | Cellular processes                   | Transcription                                                | Ribonuclease HII (EC 3.1.26.4)                                                         | 0.666 | 0.000 | 0.768 | 0.001 | 0.906 | 0.501 |
| 1030047 | COG1161R  | gbs1048 |       | General function predicted only      |                                                              | GTP-binding protein                                                                    | 0.651 | 0.002 | 0.794 | 0.003 | 1.129 | 0.185 |
| 1030048 | COG1376S  | gbs1049 |       | Hypothetical                         |                                                              | Hypothetical exported protein                                                          | 0.764 | 0.029 | 1.056 | 0.376 | 1.651 | 0.009 |
| 1030045 | COG1966T  | gbs1050 |       | Cellular processes                   | Signal transduction                                          | Carbon starvation protein A                                                            | 1.444 | 0.040 | 1.164 | 0.175 | 0.807 | 0.118 |
| 1030051 | COG3279KT | gbs1051 | lytS  | Cellular processes                   | Transcription                                                | Autolysin response regulator                                                           | 1.109 | 0.172 | 0.785 | 0.033 | 0.364 | 0.006 |
| 1030052 | COG3275T  | gbs1052 | lytR  | Cellular processes                   | Signal transduction                                          | Autolysin sensor kinase (EC 2.7.3.-)                                                   | 1.303 | 0.001 | 0.826 | 0.002 | 0.537 | 0.012 |
| 1030044 | -         | gbs1053 |       | Hypothetical                         |                                                              | Hypothetical protein                                                                   | 1.649 | 0.031 | 0.546 | 0.000 | 2.945 | 0.000 |
| 1030050 | -         | gbs1054 |       | Hypothetical                         |                                                              | Hypothetical protein                                                                   | 2.052 | 0.002 | 0.485 | 0.002 | 1.816 | 0.012 |
| 1030053 | -         | gbs1055 |       | Hypothetical                         |                                                              | Hypothetical protein                                                                   | 1.844 | 0.004 | 0.516 | 0.000 | 1.704 | 0.007 |
| 1030057 | -         | gbs1056 |       | Hypothetical                         |                                                              | Hypothetical protein                                                                   | 2.469 | 0.000 | 0.509 | 0.002 | 1.129 | 0.329 |
| 1030054 | -         | gbs1057 |       | Hypothetical                         |                                                              | Hypothetical protein                                                                   | 1.807 | 0.000 | 0.551 | 0.000 | 1.621 | 0.001 |
| 1030067 | -         | gbs1061 |       | Hypothetical                         |                                                              | Hypothetical protein                                                                   | 1.342 | 0.003 | 0.159 | 0.000 | 1.357 | 0.106 |
| 1030056 | COG4495S  | gbs1062 |       | Hypothetical                         |                                                              | Hypothetical cytosolic protein                                                         | 1.584 | 0.003 | 0.131 | 0.001 | 2.170 | 0.002 |
| 1030055 | -         | gbs1063 |       | Hypothetical                         |                                                              | Hypothetical protein                                                                   | 2.267 | 0.003 | 0.119 | 0.004 | 1.242 | 0.032 |
| 1030062 | -         | gbs1064 |       | Hypothetical                         |                                                              | Hypothetical protein                                                                   | 1.520 | 0.000 | 0.136 | 0.000 | 1.862 | 0.005 |
| 1030059 | -         | gbs1065 |       | Hypothetical                         |                                                              | Hypothetical protein                                                                   | 1.441 | 0.009 | 0.136 | 0.001 | 1.617 | 0.008 |
| 1030069 | -         | gbs1066 |       | Hypothetical                         |                                                              | Hypothetical protein                                                                   | 1.641 | 0.004 | 0.115 | 0.000 | 2.320 | 0.026 |
| 1030060 | -         | gbs1067 |       | Hypothetical                         |                                                              | Hypothetical protein                                                                   | 1.358 | 0.005 | 0.127 | 0.000 | 1.898 | 0.111 |
| 1030065 | COG1674D  | gbs1068 |       | Cellular processes                   | Cell division                                                | DNA segregation ATPase and related proteins (FtsK SpoIIIE family)                      | 1.459 | 0.022 | 0.087 | 0.000 | 3.967 | 0.005 |
| 1030066 | -         | gbs1069 |       | Hypothetical                         |                                                              | Hypothetical protein                                                                   | 1.374 | 0.002 | 0.107 | 0.001 | 2.630 | 0.001 |
| 1030070 | COG4499S  | gbs1070 |       | Hypothetical                         |                                                              | Hypothetical membrane associated protein                                               | 1.342 | 0.009 | 0.152 | 0.003 | 2.130 | 0.001 |
| 1030073 | -         | gbs1071 |       | Hypothetical                         |                                                              | Hypothetical protein                                                                   | 1.342 | 0.001 | 0.090 | 0.000 | 2.452 | 0.001 |
| 1030071 | -         | gbs1072 |       | Hypothetical                         |                                                              | Hypothetical protein                                                                   | 1.454 | 0.006 | 0.101 | 0.001 | 1.954 | 0.167 |
| 1030077 | COG1511S  | gbs1073 |       | Mobile and extrachromosomal elements |                                                              | Phage infection protein                                                                | 1.083 | 0.337 | 0.106 | 0.001 | 3.259 | 0.097 |
| 1030076 | COG4842S  | gbs1074 |       | Hypothetical                         |                                                              | Hypothetical protein                                                                   | 2.246 | 0.001 | 0.135 | 0.000 | 1.395 | 0.135 |
| 1030074 | COG5153UI | gbs1075 |       | Hypothetical                         |                                                              | Hypothetical cytosolic protein                                                         | 2.115 | 0.014 | 0.137 | 0.000 | 2.616 | 0.022 |
| 1030082 | -         | gbs1076 |       | Hypothetical                         |                                                              | Hypothetical secreted protein                                                          | 1.817 | 0.001 | 0.170 | 0.000 | 3.224 | 0.017 |
| 1030084 | COG0458EF | gbs1077 | carB  | Metabolism and transport             | Purines, pyrimidines, nucleosides, and nucleotides           | Carbamoyl-phosphate synthase large chain (EC 6.3.5.5)                                  | 1.202 | 0.028 | 0.205 | 0.000 | 2.892 | 0.002 |
| 1030081 | COG0505EF | gbs1078 | carA  | Metabolism and transport             | Purines, pyrimidines, nucleosides, and nucleotides           | Carbamoyl-phosphate synthase small chain (EC 6.3.5.5)                                  | 1.371 | 0.008 | 0.191 | 0.000 | 1.923 | 0.026 |
| 1030083 | COG0540F  | gbs1079 | pyrB  | Metabolism and transport             | Purines, pyrimidines, nucleosides, and nucleotides           | Aspartate carbamoyltransferase (EC 2.1.3.2)                                            | 1.479 | 0.009 | 0.291 | 0.000 | 3.402 | 0.000 |
| 1030072 | COG0044F  | gbs1080 | pyrC  | Metabolism and transport             | Purines, pyrimidines, nucleosides, and nucleotides           | Dihydroorotase (EC 3.5.2.3)                                                            | 0.960 | 0.209 | 0.484 | 0.001 | 2.667 | 0.002 |
| 1030087 | COG0461F  | gbs1081 | pyrE  | Metabolism and transport             | Purines, pyrimidines, nucleosides, and nucleotides           | Orotate 5-phosphoribosyltransferase (EC 2.4.2.10)                                      | 1.244 | 0.035 | 0.361 | 0.000 | 2.862 | 0.005 |
| 1030080 | COG0284F  | gbs1082 | pyrF  | Metabolism and transport             | Purines, pyrimidines, nucleosides, and nucleotides           | Orotidine 5-phosphate decarboxylase (EC 4.1.1.23)                                      | 1.339 | 0.005 | 0.476 | 0.003 | 1.410 | 0.106 |
| 1030085 | COG2966S  | COG1083 |       | Transport and binding proteins       | Unknown substrate                                            | Threonine Serine Exporter                                                              | 1.172 | 0.012 | 1.097 | 0.291 | 0.562 | 0.001 |
| 1030093 | COG0488R  | gbs1084 |       | Transport and binding proteins       | Unknown substrate                                            | ABC transporter ATP-binding protein                                                    | 1.229 | 0.002 | 0.944 | 0.027 | 0.705 | 0.029 |
| 1030086 | COG1328F  | gbs1085 | mhB   | Metabolism and transport             | Purines, pyrimidines, nucleosides, and nucleotides           | Anaerobic ribonucleoside-triphosphate reductase (EC 1.17.4.2)                          | 3.116 | 0.001 | 1.263 | 0.228 | 0.466 | 0.034 |
| 1030088 | COG0136E  | gbs1086 |       | Metabolism and transport             | Amino acids, peptides, aminosugars and amines                | Aspartate-semialdehyde dehydrogenase (EC 1.2.1.11)                                     | 1.461 | 0.001 | 0.632 | 0.000 | 2.994 | 0.008 |
| 1030097 | -         | gbs1087 | ftsA  | Hypothetical                         |                                                              | LPXTG Hypothetical protein                                                             | 1.726 | 0.000 | 0.670 | 0.008 | 0.837 | 0.529 |
| 1030090 | COG1502I  | gbs1088 |       | Metabolism and transport             | Fatty acid and phospholipids                                 | Cardiolipin synthetase (EC 2.7.8.-)                                                    | 0.797 | 0.053 | 0.684 | 0.005 | 2.134 | 0.001 |
| 1030094 | COG2759F  | gbs1089 | fts_1 | Metabolism and transport             | Purines, pyrimidines, nucleosides, and nucleotides           | Formate-tetrahydrofolate ligase (EC 6.3.4.3)                                           | 0.709 | 0.002 | 0.498 | 0.000 | 0.986 | 0.644 |
| 1030091 | COG0095H  | gbs1090 | lplA  | Metabolism and transport             | Cofactors, prosthetic groups, and carriers                   | Lipate-protein ligase A (EC 6.3.2.-)                                                   | 0.893 | 0.380 | 0.751 | 0.036 | 0.794 | 0.057 |
| 1030092 | COG0846K  | gbs1091 |       | Cellular processes                   | Transcription                                                | SIR2 family protein                                                                    | 0.730 | 0.020 | 0.725 | 0.009 | 0.825 | 0.115 |
| 1030095 | -         | gbs1092 |       | Cellular processes                   | Posttranslational modification, protein turnover, chaperones | ATPase associated with chromosome architecture replication                             | 0.758 | 0.004 | 0.672 | 0.007 | 0.779 | 0.106 |
| 1030102 | COG0509E  | gbs1093 |       | Metabolism and transport             | Amino acids, peptides, aminosugars and amines                | Glycine cleavage system H protein                                                      | 0.832 | 0.001 | 0.896 | 0.015 | 1.083 | 0.592 |
| 1030100 | COG2141C  | gbs1094 |       | Metabolism and transport             | Energy production and conversion                             | Luciferase-like monooxygenase (EC 1.14.-)                                              | 0.796 | 0.012 | 0.832 | 0.007 | 0.873 | 0.400 |
| 1030096 | COG1902C  | gbs1095 |       | Metabolism and transport             | Energy production and conversion                             | Probable NADH-dependent flavin oxidoreductase yqiG (EC 1.-.-)                          | 0.760 | 0.034 | 0.870 | 0.050 | 1.024 | 0.752 |
| 1030101 | COG0095H  | gbs1096 |       | Metabolism and transport             | Cofactors, prosthetic groups, and carriers                   | Lipate-protein ligase A (EC 6.3.2.-)                                                   | 0.890 | 0.029 | 0.765 | 0.005 | 0.753 | 0.136 |
| 1030107 | COG0452H  | gbs1097 | dprB  | Metabolism and transport             | Cofactors, prosthetic groups, and carriers                   | Phosphopantothenate--cysteine ligase (EC 6.3.2.5)                                      | 0.879 | 0.110 | 0.830 | 0.006 | 0.805 | 0.271 |
| 1030103 | COG0452H  | gbs1098 | dpr   | Metabolism and transport             | Cofactors, prosthetic groups, and carriers                   | Phosphopantothenoylcysteine decarboxylase (EC 4.1.1.36)                                | 0.943 | 0.377 | 0.843 | 0.037 | 0.764 | 0.086 |
| 1030098 | COG4684S  | gbs1099 |       | Hypothetical                         |                                                              | Integral membrane protein                                                              | 1.033 | 0.170 | 1.060 | 0.153 | 0.896 | 0.423 |
| 1030099 | COG1109G  | gbs1100 | pgmA  | Metabolism and transport             | Carbohydrates, organic alcohols, and acids                   | Phosphoglucosyltransferase (EC 5.4.2.2) Phosphomannomutase (EC 5.4.2.8)                | 1.183 | 0.000 | 1.056 | 0.198 | 1.786 | 0.004 |
| 1030108 | -         | gbs1101 |       | Hypothetical                         |                                                              | Hypothetical protein                                                                   | 1.094 | 0.064 | 1.545 | 0.011 | 2.979 | 0.003 |
| 1030115 | COG1132V  | gbs1102 |       | Cellular processes                   | Toxin production and resistance                              | Multidrug protein lipid ABC transporter family, ATP-binding and permease protein       | 1.161 | 0.151 | 1.539 | 0.000 | 2.024 | 0.007 |
| 1030106 | COG1132V  | gbs1103 |       | Cellular processes                   | Toxin production and resistance                              | Multidrug resistance ABC transporter ATP-binding and permease protein                  | 1.070 | 0.137 | 1.470 | 0.001 | 3.255 | 0.001 |
| 1030105 | -         | gbs1104 |       | Hypothetical                         |                                                              | Antigen                                                                                | 1.219 | 0.070 | 1.175 | 0.116 | 3.350 | 0.041 |
| 1030119 | -         | gbs1105 |       | Hypothetical                         |                                                              | Hypothetical protein                                                                   | 1.233 | 0.053 | 1.279 | 0.076 | 2.874 | 0.006 |
| 1030114 | COG0112E  | gbs1106 | glyA  | Metabolism and transport             | Amino acids, peptides, aminosugars and amines                | Serine hydroxymethyltransferase (EC 2.1.2.1)                                           | 1.218 | 0.093 | 1.131 | 0.156 | 2.883 | 0.002 |
| 1030116 | COG0009J  | gbs1107 |       | Cellular processes                   | Translation, ribosomal structure and biogenesis              | Sua5 YgiO YrdC YwC family protein                                                      | 0.938 | 0.121 | 1.204 | 0.027 | 4.546 | 0.001 |
| 1030111 | COG2890J  | gbs1108 | hemK  | Cellular processes                   | Translation, ribosomal structure and biogenesis              | Peptide release factor-glutamine N5-methyltransferase (EC 2.1.1.-)                     | 1.003 | 0.960 | 1.122 | 0.000 | 4.748 | 0.000 |
| 1030109 | COG0216J  | gbs1109 | prfA  | Cellular processes                   | Translation, ribosomal structure and biogenesis              | Bacterial Peptide Chain Release Factor 1 (RF-1)                                        | 1.069 | 0.148 | 1.120 | 0.111 | 3.478 | 0.000 |
| 1030113 | COG1435F  | gbs1110 | tdk2  | Metabolism and transport             | Purines, pyrimidines, nucleosides, and nucleotides           | Thymidine kinase (EC 2.7.1.21)                                                         | 1.250 | 0.014 | 1.176 | 0.030 | 3.093 | 0.001 |
| 1030117 | COG1942R  | gbs1111 |       | Metabolism and transport             | Energy production and conversion                             | 4-oxalocrotonate tautomerase (EC 5.3.2.-)                                              | 2.542 | 0.000 | 0.767 | 0.014 | 1.875 | 0.177 |
| 1030118 | -         | gbs1112 | apbE  | Metabolism and transport             | Cofactors, prosthetic groups, and carriers                   | Iron-sulfur cluster assembly repair protein ApbE                                       | 0.223 | 0.007 | 0.353 | 0.000 | 1.073 | 0.571 |
| 1030120 | COG0431R  | gbs1113 |       | Metabolism and transport             | Central intermediary metabolism                              | NADPH-dependent FMN reductase family protein                                           | 0.231 | 0.005 | 0.393 | 0.002 | 0.979 | 0.757 |
| 1030123 | COG0431R  | COG1114 |       | Metabolism and transport             | Central intermediary metabolism                              | Oxidoreductase (EC 1.1.1.-)                                                            | 0.240 | 0.007 | 0.340 | 0.000 | 0.992 | 0.902 |
| 1030125 | COG2116P  | gbs1115 |       | Metabolism and transport             | Inorganic ion transport and metabolism                       | Formate nitrite transporter family protein                                             | 0.273 | 0.002 | 0.290 | 0.000 | 1.290 | 0.050 |
| 1030122 | COG2233F  | gbs1116 |       | Metabolism and transport             | Purines, pyrimidines, nucleosides, and nucleotides           | Xanthine permease                                                                      | 0.429 | 0.000 | 4.044 | 0.000 | 1.560 | 0.038 |
| 1030124 | COG0503F  | gbs1117 | xpt   | Metabolism and transport             | Purines, pyrimidines, nucleosides, and nucleotides           | Xanthine phosphoribosyltransferase (EC 2.4.2.-)                                        | 0.557 | 0.000 | 4.357 | 0.000 | 1.525 | 0.004 |
| 1030130 | -         | gbs1118 |       | Hypothetical                         |                                                              | Hypothetical protein                                                                   | 0.385 | 0.001 | 0.645 | 0.011 | 0.643 | 0.263 |
| 1030126 | -         | gbs1119 |       | Hypothetical                         |                                                              | Hypothetical phase protein                                                             | 0.502 | 0.014 | 0.685 | 0.029 | 0.591 | 0.181 |
| 1030127 | COG0863L  | COG1120 |       | Cellular processes                   | DNA replication, recombination and repair                    | Chromosomal partitioning protein parB Adenine-specific methyltransferase (EC 2.1.1.72) | 0.340 | 0.150 | 0.445 | 0.057 | 0.534 | 0.382 |
| 1030132 | COG3843U  | gbs1121 |       | General function predicted only      |                                                              | Relaxase                                                                               | 0.610 | 0.012 | 1.219 | 0.715 | 0.590 | 0.583 |
| 1030128 | -         | gbs1122 |       | Mobile and extrachromosomal elements |                                                              | Mobilisation protein                                                                   | 0.043 | 0.008 | 0.238 | 0.160 | 4.229 | 0.016 |
| 1030133 | -         | gbs1123 |       | Hypothetical                         |                                                              | Hypothetical protein                                                                   | 0.352 | 0.042 | 0.931 | 0.523 | 2.330 | 0.071 |
| 1030129 | -         | gbs1124 |       | Hypothetical                         |                                                              | Hypothetical protein                                                                   | 0.729 | 0.089 | 1.191 | 0.515 | 0.482 | 0.381 |
| 1030135 | -         | gbs1125 |       | Hypothetical                         |                                                              | Hypothetical protein                                                                   | 0.833 | 0.090 | 1.426 | 0.390 | 2.648 | 0.087 |
| 1030134 | -         | gbs1126 |       | General function predicted only      |                                                              | LtrC-like protein                                                                      | 0.623 | 0.425 | 0.456 | 0.091 | 1.278 | 0.179 |
| 1030137 | -         | gbs1127 |       | Hypothetical                         |                                                              | Hypothetical protein                                                                   | 0.238 | 0.039 | 0.589 | 0.430 | 7.049 | 0.018 |
| 1030131 | COG3505U  | gbs1128 |       | Mobile and extrachromosomal elements |                                                              | Trag TraD family                                                                       | 0.621 | 0.029 | 0.936 | 0.586 | 1.608 | 0.348 |
| 1030141 | -         | gbs1129 |       | Hypothetical                         |                                                              | Hypothetical protein                                                                   | 1.016 | 0.906 | 0.986 | 0.926 | 3.099 | 0.003 |
| 1030138 | -         | gbs1130 |       | Hypothetical                         |                                                              | Hypothetical protein                                                                   | 0.761 | 0.248 | 0.916 | 0.554 | 2.493 | 0.053 |
| 1030143 | -         | gbs1131 |       | Hypothetical                         |                                                              | Hypothetical protein                                                                   | 0.593 | 0.019 | 0.939 | 0.643 | 3.484 | 0.068 |
| 1030142 | -</       |         |       |                                      |                                                              |                                                                                        |       |       |       |       |       |       |



|         |               |         |        |                                      |                                                                                 |                                                                                |       |       |       |       |       |       |
|---------|---------------|---------|--------|--------------------------------------|---------------------------------------------------------------------------------|--------------------------------------------------------------------------------|-------|-------|-------|-------|-------|-------|
| 1030145 | COG3942R      | gbs1133 |        | Hypothetical                         |                                                                                 | Hypothetical protein                                                           | 0.547 | 0.013 | 0.928 | 0.644 | 1.540 | 0.427 |
| 1030140 | -             | gbs1134 |        | Hypothetical                         |                                                                                 | Hypothetical protein                                                           | 1.358 | 0.005 | 1.186 | 0.085 | 0.999 | 0.999 |
| 1030146 | COG3451U      | gbs1135 |        | Hypothetical                         |                                                                                 | TRSE PROTEIN                                                                   | 0.608 | 0.029 | 0.977 | 0.934 | 4.008 | 0.011 |
| 1030150 | -             | gbs1136 |        | Hypothetical                         |                                                                                 | Hypothetical protein                                                           | 0.646 | 0.054 | 0.911 | 0.315 | 1.975 | 0.014 |
| 1030147 | -             | gbs1137 |        | Hypothetical                         |                                                                                 | Hypothetical protein                                                           | 0.809 | 0.365 | 0.807 | 0.286 | 2.673 | 0.108 |
| 1030139 | -             | gbs1138 |        | Hypothetical                         |                                                                                 | Hypothetical protein                                                           | 0.726 | 0.200 | 1.146 | 0.284 | 2.106 | 0.201 |
| 1030151 | -             | gbs1139 |        | Hypothetical                         |                                                                                 | Hypothetical protein                                                           | 1.181 | 0.306 | 0.996 | 0.985 | 1.646 | 0.006 |
| 1030152 | -             | gbs1140 |        | Hypothetical                         |                                                                                 | Hypothetical protein                                                           | 0.783 | 0.069 | 0.831 | 0.294 | 2.782 | 0.051 |
| 1030149 | -             | gbs1141 |        | Hypothetical                         |                                                                                 | Hypothetical protein                                                           | 0.951 | 0.243 | 0.813 | 0.029 | 0.682 | 0.031 |
| 1030144 | -             | gbs1142 |        | Hypothetical                         |                                                                                 | Hypothetical protein                                                           | 1.053 | 0.744 | 1.025 | 0.903 | 1.119 | 0.518 |
| 1030157 | -             | gbs1143 | epf    | Hypothetical                         |                                                                                 | LPXTG Cell surface protein                                                     | 1.237 | 0.183 | 0.728 | 0.022 | 3.179 | 0.006 |
| 1030153 | -             | gbs1144 |        | Hypothetical                         |                                                                                 | LPXTG Cell surface protein                                                     | 1.349 | 0.021 | 0.642 | 0.015 | 3.366 | 0.001 |
| 1030159 | -             | gbs1145 |        | Cell Envelope                        | Other                                                                           | LPXTG M protein                                                                | 2.808 | 0.376 | 0.705 | 0.307 | 5.058 | 0.013 |
| 1030148 | -             | gbs1146 |        | Hypothetical                         |                                                                                 | Hypothetical protein                                                           | 1.086 | 0.526 | 0.744 | 0.190 | 2.699 | 0.018 |
| 1030163 | COG1396K      | gbs1147 |        | Cellular processes                   | Transcription                                                                   | Transcriptional regulator, Cro CI family                                       | 0.632 | 0.007 | 0.572 | 0.032 | 2.405 | 0.173 |
| 1030155 | -             | gbs1148 |        | Hypothetical                         |                                                                                 | Hypothetical protein                                                           | 0.747 | 0.124 | 0.402 | 0.036 | 3.340 | 0.037 |
| 1030154 | -             | gbs1149 |        | General function predicted only      |                                                                                 | Replication initiator protein                                                  | 0.710 | 0.062 | 0.557 | 0.005 | 1.001 | 0.996 |
| 1030156 | -             | gbs1150 |        | Hypothetical                         |                                                                                 | Hypothetical protein                                                           | 0.697 | 0.304 | 0.272 | 0.002 | 1.645 | 0.470 |
| 1030166 | -             | gbs1151 |        | Hypothetical                         |                                                                                 | Hypothetical protein                                                           | 0.499 | 0.028 | 0.378 | 0.082 | 0.943 | 0.928 |
| 1030158 | -             | gbs1152 |        | Hypothetical                         |                                                                                 | Hypothetical protein                                                           | 0.938 | 0.860 | 0.127 | 0.068 | 4.087 | 0.014 |
| 1030160 | -             | gbs1153 |        | Hypothetical                         |                                                                                 | Hypothetical protein                                                           | 0.352 | 0.183 | 0.134 | 0.173 | 2.021 | 0.366 |
| 1030167 | COG0516F      | gbs1154 | guaC   | Metabolism and transport             | Purines, pyrimidines, nucleosides, and nucleotides                              | GMP reductase (EC 1.7.1.7)                                                     | 1.126 | 0.082 | 0.167 | 0.004 | 1.315 | 0.591 |
| 1030161 | -             | gbs1155 |        | Cellular processes                   | Toxin production and resistance                                                 | Multidrug resistance protein B                                                 | 0.833 | 0.040 | 0.641 | 0.003 | 1.698 | 0.017 |
| 1030165 | -             | gbs1156 |        | Cellular processes                   | Toxin production and resistance                                                 | Na+ driven multidrug efflux pump                                               | 2.666 | 0.003 | 1.070 | 0.549 | 1.597 | 0.004 |
| 1030162 | COG3158P      | gbs1157 |        | Metabolism and transport             | Inorganic ion transport and metabolism                                          | Kup system potassium uptake protein                                            | 1.491 | 0.000 | 1.463 | 0.002 | 2.162 | 0.002 |
| 1030169 | COG4221R      | gbs1158 |        | Metabolism and transport             | Central intermediary metabolism                                                 | Short chain dehydrogenase                                                      | 1.256 | 0.080 | 0.825 | 0.078 | 1.871 | 0.011 |
| 1030164 | COG0280C      | gbs1159 | pta    | Metabolism and transport             | Energy production and conversion                                                | Phosphate acetyltransferase (EC 2.3.1.8)                                       | 1.143 | 0.098 | 1.069 | 0.016 | 1.289 | 0.167 |
| 1030171 | COG0564J      | gbs1160 |        | Cellular processes                   | Translation, ribosomal structure and biogenesis                                 | Ribosomal large subunit pseudouridine synthase D (EC 4.2.1.70)                 | 0.962 | 0.460 | 1.135 | 0.027 | 2.234 | 0.011 |
| 1030172 | COG0061G      | gbs1161 | ppnK   | Metabolism and transport             | Carbohydrates, organic alcohols, and acids                                      | ATP-NAD kinase (EC 2.7.1.23)                                                   | 1.246 | 0.044 | 1.141 | 0.135 | 2.045 | 0.002 |
| 1030177 | COG2357S      | gbs1162 |        | Metabolism and transport             | Purines, pyrimidines, nucleosides, and nucleotides                              | GTP pyrophosphokinase homolog                                                  | 1.186 | 0.017 | 1.116 | 0.068 | 2.174 | 0.012 |
| 1030173 | COG4116S      | gbs1163 |        | General function predicted only      |                                                                                 | Organic phosphate binding CYTH family protein                                  | 1.065 | 0.384 | 0.682 | 0.005 | 2.567 | 0.003 |
| 1030168 | COG0462FE     | gbs1164 |        | Metabolism and transport             | Purines, pyrimidines, nucleosides, and nucleotides                              | Ribose-phosphate pyrophosphokinase (EC 2.7.6.1)                                | 0.886 | 0.104 | 1.106 | 0.236 | 0.920 | 0.258 |
| 1030175 | COG1104E      | gbs1165 | nifS2  | Metabolism and transport             | Amino acids, peptides, aminosugars and amines                                   | Cysteine desulfurase (EC 2.8.1.7) Selenocysteine lyase (EC 4.4.1.16)           | 0.845 | 0.023 | 0.934 | 0.095 | 1.111 | 0.223 |
| 1030178 | -             | gbs1166 |        | Hypothetical                         |                                                                                 | Hypothetical cytosolic protein                                                 | 0.943 | 0.094 | 0.999 | 0.980 | 0.734 | 0.125 |
| 1030176 | COG2344R      | gbs1167 |        | General function predicted only      |                                                                                 | AT-rich DNA-binding protein                                                    | 1.230 | 0.048 | 0.869 | 0.155 | 0.982 | 0.888 |
| 1030180 | COG2003L      | gbs1168 | radC   | Cellular processes                   | DNA replication, recombination and repair                                       | DNA repair protein radC                                                        | 0.770 | 0.465 | 1.022 | 0.959 | 0.292 | 0.215 |
| 1030179 | COG0628R      | gbs1169 |        | Hypothetical                         |                                                                                 | Hypothetical membrane spanning protein                                         | 0.896 | 0.224 | 0.813 | 0.008 | 0.969 | 0.591 |
| 1030181 | -             | gbs1170 |        | Metabolism and transport             | Carbohydrates, organic alcohols, and acids                                      | 6-phospho-beta-glucosidase (EC 3.2.1.86)                                       | 1.870 | 0.008 | 1.075 | 0.537 | 2.281 | 0.009 |
| 1030185 | COG2755E      | gbs1171 |        | Metabolism and transport             | Fatty acid and phospholipids                                                    | Lipase Acylhydrolase family protein                                            | 1.769 | 0.000 | 1.340 | 0.004 | 4.033 | 0.000 |
| 1030182 | COG0561R      | gbs1172 |        | Metabolism and transport             | Central intermediary metabolism                                                 | Hydrolase (HAD superfamily)                                                    | 2.211 | 0.003 | 1.766 | 0.001 | 3.652 | 0.000 |
| 1030192 | -             | gbs1173 |        | Cellular processes                   | Transcription                                                                   | Transcriptional regulator, AraC family                                         | 1.638 | 0.019 | 1.060 | 0.781 | 0.564 | 0.150 |
| 1030186 | COG0038P      | gbs1174 |        | Metabolism and transport             | Inorganic ion transport and metabolism                                          | Chloride channel protein                                                       | 0.829 | 0.042 | 0.869 | 0.001 | 0.744 | 0.090 |
| 1030184 | COG0687E      | gbs1175 |        | Metabolism and transport             | Amino acids, peptides, aminosugars and amines                                   | Spermidine putrescine-binding protein                                          | 0.502 | 0.000 | 0.883 | 0.013 | 2.277 | 0.001 |
| 1030190 | COG1177E      | gbs1176 | potC   | Metabolism and transport             | Amino acids, peptides, aminosugars and amines                                   | Spermidine putrescine transport system permease protein potC                   | 0.582 | 0.004 | 0.851 | 0.055 | 3.337 | 0.000 |
| 1030194 | COG1176E      | gbs1177 | potB   | Metabolism and transport             | Amino acids, peptides, aminosugars and amines                                   | Spermidine putrescine transport system permease protein potB                   | 0.563 | 0.000 | 0.905 | 0.087 | 3.132 | 0.002 |
| 1030187 | COG3842E      | gbs1178 | potA   | Metabolism and transport             | Amino acids, peptides, aminosugars and amines                                   | Spermidine putrescine transport ATP-binding protein potA                       | 0.623 | 0.000 | 0.814 | 0.003 | 2.454 | 0.004 |
| 1030189 | COG0812M      | gbs1179 | murB   | Cell Envelope                        | Biosynthesis and degradation of murein sacculus and peptidoglycan               | UDP-N-acetylenolpyruvylglucosamine reductase (EC 1.1.1.158)                    | 0.709 | 0.025 | 0.799 | 0.033 | 2.185 | 0.033 |
| 1030195 | COG0801H      | gbs1180 | folK   | Metabolism and transport             | Cofactors, prosthetic groups, and carriers                                      | 2-amino-4-hydroxy-6-hydroxymethylhydropteridine pyrophosphokinase (EC 2.7.6.3) | 1.121 | 0.263 | 1.117 | 0.008 | 2.701 | 0.034 |
| 1030197 | COG1539H      | gbs1181 | folQ   | Metabolism and transport             | Cofactors, prosthetic groups, and carriers                                      | Dihydroneopterin aldolase (EC 4.1.2.25)                                        | 0.941 | 0.370 | 1.078 | 0.009 | 3.472 | 0.000 |
| 1030193 | COG0294H      | gbs1182 | folP   | Metabolism and transport             | Cofactors, prosthetic groups, and carriers                                      | Dihydropterolate synthase (EC 2.5.1.15)                                        | 1.051 | 0.400 | 1.072 | 0.155 | 4.461 | 0.000 |
| 1030198 | COG0302H      | gbs1183 | folE   | Metabolism and transport             | Cofactors, prosthetic groups, and carriers                                      | GTP cyclohydrolase I (EC 3.5.4.16)                                             | 1.169 | 0.325 | 1.046 | 0.572 | 3.881 | 0.005 |
| 1030196 | COG0285H      | gbs1184 | folC.1 | Metabolism and transport             | Cofactors, prosthetic groups, and carriers                                      | Folypolyglutamate synthase (EC 6.3.2.17) Dihydrofolate synthase (EC 6.3.2.12)  | 0.973 | 0.396 | 0.988 | 0.609 | 3.276 | 0.000 |
| 1030203 | COG2962R      | gbs1185 |        | General function predicted only      |                                                                                 | Chloramphenicol-sensitive protein radD                                         | 0.925 | 0.031 | 1.004 | 0.831 | 4.066 | 0.000 |
| 1030201 | COG0083E      | gbs1186 |        | Metabolism and transport             | Amino acids, peptides, aminosugars and amines                                   | Homoserine kinase (EC 2.7.1.39)                                                | 0.909 | 0.056 | 0.932 | 0.493 | 2.210 | 0.017 |
| 1030200 | COG0460E      | gbs1187 |        | Metabolism and transport             | Amino acids, peptides, aminosugars and amines                                   | Homoserine dehydrogenase (EC 1.1.1.13)                                         | 0.835 | 0.044 | 0.818 | 0.005 | 2.183 | 0.042 |
| 1030199 | -             | gbs1188 |        | Cell Envelope                        | Biosynthesis and degradation of surface polysaccharides and lipopolysaccharides | Polysaccharide deacetylase                                                     | 1.982 | 0.000 | 1.567 | 0.007 | 1.811 | 0.001 |
| 1030205 | COG1292M      | gbs1191 |        | Metabolism and transport             | Amino acids, peptides, aminosugars and amines                                   | Glycine betaine transporter                                                    | 2.513 | 0.000 | 2.056 | 0.002 | 3.986 | 0.001 |
| 1030211 | COG1012C      | gbs1192 | gabD   | Metabolism and transport             | Energy production and conversion                                                | Succinate-semialdehyde dehydrogenase [NADP+] (EC 1.2.1.16)                     | 2.304 | 0.008 | 1.531 | 0.029 | 0.829 | 0.081 |
| 1030206 | -             | gbs1193 |        | Hypothetical                         |                                                                                 | Hypothetical membrane spanning protein                                         | 1.898 | 0.008 | 1.114 | 0.197 | 0.650 | 0.140 |
| 1030213 | -             | gbs1194 |        | Hypothetical                         |                                                                                 | Hypothetical protein                                                           | 1.116 | 0.038 | 1.020 | 0.561 | 0.831 | 0.128 |
| 1030214 | -             | gbs1195 | ska    | General function predicted only      |                                                                                 | streptokinase                                                                  | 1.177 | 0.063 | 1.784 | 0.006 | 0.708 | 0.006 |
| 1030207 | COG1476K      | gbs1196 |        | Cellular processes                   | Transcription                                                                   | Transcriptional regulator, Cro CI family                                       | 1.216 | 0.074 | 0.918 | 0.268 | 0.601 | 0.045 |
| 1030212 | -             | gbs1197 |        | Hypothetical                         |                                                                                 | Hypothetical protein                                                           | 0.937 | 0.230 | 0.951 | 0.632 | 0.845 | 0.162 |
| 1030210 | COG2077O      | gbs1198 | tpx    | Metabolism and transport             | Energy production and conversion                                                | Thioredoxin peroxidase (EC 1.11.1.15)                                          | 1.463 | 0.019 | 0.691 | 0.000 | 2.114 | 0.001 |
| 1030217 | COG4912L      | gbs1199 |        | Hypothetical                         |                                                                                 | Hypothetical protein                                                           | 0.797 | 0.049 | 0.606 | 0.001 | 2.125 | 0.003 |
| 1030218 | COG0561R      | gbs1200 |        | Metabolism and transport             | Central intermediary metabolism                                                 | Hydrolase (HAD superfamily)                                                    | 0.927 | 0.221 | 0.663 | 0.001 | 2.462 | 0.000 |
| 1030216 | COG0490P, COG | gbs1201 |        | Metabolism and transport             | Inorganic ion transport and metabolism                                          | NAD-dependent K+ or Na+ uptake system component                                | 0.957 | 0.412 | 0.806 | 0.071 | 1.433 | 0.006 |
| 1030219 | -             | gbs1202 |        | Cellular processes                   | Posttranslational modification, protein turnover, chaperones                    | General stress protein, Gls24 family                                           | 2.036 | 0.001 | 0.523 | 0.001 | 0.664 | 0.015 |
| 1030221 | -             | gbs1203 |        | Hypothetical                         |                                                                                 | Hypothetical protein                                                           | 1.845 | 0.005 | 0.714 | 0.015 | 0.538 | 0.012 |
| 1030215 | -             | gbs1204 |        | Cellular processes                   | Posttranslational modification, protein turnover, chaperones                    | General stress protein, Gls24 family                                           | 2.682 | 0.000 | 0.556 | 0.000 | 0.585 | 0.008 |
| 1030223 | -             | gbs1205 |        | General function predicted only      |                                                                                 | Small integral membrane protein                                                | 2.476 | 0.002 | 0.576 | 0.012 | 0.639 | 0.018 |
| 1030222 | -             | gbs1206 |        | Hypothetical                         |                                                                                 | Hypothetical protein                                                           | 2.662 | 0.016 | 0.567 | 0.012 | 0.818 | 0.071 |
| 1030224 | COG2261S      | gbs1207 |        | Hypothetical                         |                                                                                 | Integral membrane protein                                                      | 4.065 | 0.017 | 0.523 | 0.012 | 0.817 | 0.003 |
| 1030220 | COG2261S      | gbs1208 |        | Hypothetical                         |                                                                                 | Integral membrane protein                                                      | 3.459 | 0.019 | 0.578 | 0.027 | 0.784 | 0.039 |
| 1030227 | COG0210L      | gbs1209 | pcrA   | Cellular processes                   | DNA replication, recombination and repair                                       | DNA helicase II (EC 3.6.1.-)                                                   | 0.935 | 0.334 | 2.136 | 0.000 | 2.597 | 0.062 |
| 1030226 | COG2050Q      | gbs1210 |        | Metabolism and transport             | Secondary metabolites                                                           | Thioesterase superfamily protein                                               | 1.574 | 0.005 | 0.501 | 0.006 | 1.150 | 0.368 |
| 1030225 | COG2233F      | gbs1211 | pyrP   | Metabolism and transport             | Purines, pyrimidines, nucleosides, and nucleotides                              | Uracil permease                                                                | 0.605 | 0.007 | 0.643 | 0.009 | 5.577 | 0.000 |
| 1030230 | COG1115E      | gbs1212 |        | Metabolism and transport             | Amino acids, peptides, aminosugars and amines                                   | Na(+)-linked D-alanine glycine permease                                        | 0.449 | 0.000 | 2.089 | 0.006 | 2.457 | 0.032 |
| 1030229 | COG0053P      | gbs1213 |        | Metabolism and transport             | Inorganic ion transport and metabolism                                          | Cobalt-zinc-cadmium resistance protein czcD                                    | 0.982 | 0.851 | 1.677 | 0.000 | 0.765 | 0.254 |
| 1030228 | COG1380R      | gbs1214 |        | Cell Envelope                        | Biosynthesis and degradation of murein sacculus and peptidoglycan               | Murein hydrolase exporter                                                      | 0.442 | 0.004 | 0.381 | 0.000 | 0.530 | 0.016 |
| 1030236 | -             | gbs1215 |        | Cell Envelope                        | Biosynthesis and degradation of murein sacculus and peptidoglycan               | Murein hydrolase export regulator                                              | 0.356 | 0.002 | 0.344 | 0.000 | 0.789 | 0.021 |
| 1030234 | -             | gbs1216 |        | Mobile and extrachromosomal elements |                                                                                 | Phage protein                                                                  | 1.114 | 0.360 | 0.844 | 0.049 | 1.166 | 0.050 |
| 1030237 | -             | gbs1217 |        | Hypothetical                         |                                                                                 | Hypothetical protein                                                           | 0.413 | 0.122 | 1.017 | 0.940 | 0.969 | 0.976 |
| 1030233 | -             | gbs1218 |        | Hypothetical                         |                                                                                 | Hypothetical protein                                                           | 2.451 | 0.010 | 1.747 | 0.005 | 0.643 | 0.140 |
| 1030242 | -             | gbs1219 |        | Mobile and extrachromosomal elements |                                                                                 | Phage protein                                                                  | 0.162 | 0.081 | 0.945 | 0.813 | 1.881 | 0.485 |
| 1030241 | -             | gbs1220 |        | Hypothetical                         |                                                                                 | Hypothetical protein                                                           | 1.069 | 0.468 | 1.063 | 0.393 | 0.831 | 0.421 |
| 1030240 | COG2932K      | gbs1221 |        | Cellular processes                   | Transcription                                                                   | Phage transcriptional repressor                                                | 0.667 | 0.006 | 0.710 | 0.000 | 1.219 | 0.069 |
| 1030239 | -             | gbs1222 |        | Mobile and extrachromosomal elements |                                                                                 | Phage protein                                                                  | 0.818 | 0.013 | 0.681 | 0.019 | 1.010 | 0.939 |
| 1030238 | COG4823V      | gbs1223 |        | Hypothetical                         |                                                                                 | Hypothetical protein                                                           | 0.956 | 0.406 | 0.583 | 0.008 | 1.158 | 0.468 |
| 1030246 | COG0582L      | gbs1224 | int.3  | Mobile and extrachromosomal elements |                                                                                 | DNA integration recombination inversion protein                                | 0.545 | 0.061 | 0.333 | 0.005 | 0.438 | 0.016 |
| 1030244 | COG0539J      | gbs1225 |        | Cellular processes                   | Translation, ribosomal structure and biogenesis                                 | SSU ribosomal protein S1P                                                      | 0.861 | 0.074 | 1.171 | 0.023 | 1.571 | 0.139 |
| 1030250 | -             | gbs1226 |        | Hypothetical                         |                                                                                 | Hypothetical cytosolic protein                                                 | 1.237 | 0.006 | 1.184 | 0.003 | 1.895 | 0.028 |

|         |               |           |        |                                      |                                                                         |                                                                                          |       |       |       |       |        |       |
|---------|---------------|-----------|--------|--------------------------------------|-------------------------------------------------------------------------|------------------------------------------------------------------------------------------|-------|-------|-------|-------|--------|-------|
| 1030248 | COG0115EH     | gbs1227   | bcaT   | Metabolism and transport             | Amino acids, peptides, aminosugars and amines                           | Branched-chain amino acid aminotransferase (EC 2.6.1.42)                                 | 0.856 | 0.035 | 1.027 | 0.369 | 0.870  | 0.143 |
| 1030251 | COG0118L      | gbs1228   | parC   | Cellular processes                   | DNA replication, recombination and repair                               | Topoisomerase IV subunit A (EC 5.99.1.-)                                                 | 0.733 | 0.001 | 1.068 | 0.076 | 0.967  | 0.348 |
| 1030247 | COG0187L      | gbs1229   | parE   | Cellular processes                   | DNA replication, recombination and repair                               | Topoisomerase IV subunit B (EC 5.99.1.-)                                                 | 0.717 | 0.000 | 1.107 | 0.001 | 0.820  | 0.108 |
| 1030254 | COG0344S      | gbs1230   |        | Hypothetical                         |                                                                         | Hypothetical membrane spanning protein                                                   | 0.803 | 0.009 | 0.831 | 0.011 | 1.081  | 0.245 |
| 1030253 | COG0692L      | gbs1231   | ung    | Cellular processes                   | DNA replication, recombination and repair                               | Uracil-DNA glycosylase (EC 3.2.2.-)                                                      | 1.355 | 0.039 | 0.918 | 0.328 | 0.957  | 0.291 |
| 1030255 | -             | gbs1232   |        | Hypothetical                         |                                                                         | Hypothetical protein                                                                     | 1.199 | 0.022 | 1.607 | 0.000 | 0.656  | 0.007 |
| 1030252 | COG1083M, COG | gbs1233   | neuA   | General function predicted only      |                                                                         | Acylneuraminate cytidyltransferase (EC 2.7.7.43)                                         | 0.812 | 0.023 | 1.781 | 0.002 | 0.894  | 0.215 |
| 1030259 | COG0110R      | gbs1234   | neuD   | Cell Envelope                        | Biosynthesis and degradation of surface polysaccharides and lipopolysac | Sialic acid biosynthesis protein NeuD                                                    | 0.966 | 0.393 | 1.509 | 0.000 | 1.080  | 0.273 |
| 1030260 | COG0381M      | gbs1235   | neuC   | Cell Envelope                        | Biosynthesis and degradation of surface polysaccharides and lipopolysac | UDP-N-acetylglucosamine 2-epimerase (N-acetylmannosamine-forming) (EC 5.1.3.-)           | 0.879 | 0.047 | 1.638 | 0.000 | 0.893  | 0.243 |
| 1030261 | COG2089M      | gbs1236   | neuB   | Cell Envelope                        | Biosynthesis and degradation of surface polysaccharides and lipopolysac | N-acetylneuraminate synthase (EC 2.5.1.56)                                               | 0.767 | 0.001 | 1.546 | 0.001 | 1.141  | 0.135 |
| 1030258 | COG2244R      | gbs1237   | cpsM   | Cell Envelope                        | Biosynthesis and degradation of surface polysaccharides and lipopolysac | Capsular polysaccharide protein CpsK                                                     | 0.790 | 0.001 | 1.420 | 0.004 | 1.132  | 0.162 |
| 1030256 | -             | gbs1237.1 | cpsL   | Cell Envelope                        | Biosynthesis and degradation of surface polysaccharides and lipopolysac | beta-D-Galp alpha-2,3-sialyltransferase (EC 2.4.99.-)                                    | 0.766 | 0.024 | 1.346 | 0.029 | 1.333  | 0.048 |
| 1030262 | COG0463M      | gbs1238   | CpsIaj | Cell Envelope                        | Biosynthesis and degradation of surface polysaccharides and lipopolysac | beta-D-GlcNAc beta-1,4-galactosyltransferase (EC 2.4.1.-)                                | 0.821 | 0.027 | 1.472 | 0.002 | 1.482  | 0.001 |
| 1030263 | COG0463M      | gbs1239   | cpsJ   | Cell Envelope                        | Biosynthesis and degradation of surface polysaccharides and lipopolysac | beta-D-Galp beta-1,3-N-acetylglucosaminyltransferase (EC 2.4.1.-)                        | 0.817 | 0.001 | 1.367 | 0.000 | 1.445  | 0.016 |
| 1030265 | -             | gbs1240   | cpsI   | General function predicted only      |                                                                         | Secreted polysaccharide polymerase                                                       | 0.929 | 0.259 | 1.511 | 0.030 | 1.182  | 0.333 |
| 1030267 | -             | gbs1241   | cpsG   | Cell Envelope                        | Biosynthesis and degradation of surface polysaccharides and lipopolysac | beta-D-Glcp beta-1,4-galactosyltransferase (EC 2.4.1.-)                                  | 0.837 | 0.008 | 1.437 | 0.006 | 1.267  | 0.026 |
| 1030269 | COG0707M      | gbs1242   | cpsF   | Metabolism and transport             | Carbohydrates, organic alcohols, and acids                              | Beta-1,4-galactosyltransferase accessory protein                                         | 0.825 | 0.003 | 1.376 | 0.000 | 1.419  | 0.005 |
| 1030266 | COG2148M      | gbs1243   | cpsE   | Cell Envelope                        | Biosynthesis and degradation of surface polysaccharides and lipopolysac | Undecaprenyl-phosphate beta-galactosephosphotransferase (EC 2.7.8.-)                     | 0.786 | 0.006 | 1.300 | 0.000 | 1.259  | 0.044 |
| 1030264 | COG0489D      | gbs1244   | cpsD   | Cell Envelope                        | Biosynthesis and degradation of surface polysaccharides and lipopolysac | Tyrosine-protein kinase (capsular polysaccharide biosynthesis)                           | 0.897 | 0.024 | 1.274 | 0.004 | 0.912  | 0.287 |
| 1030272 | COG3944M      | gbs1245   | cpsC   | Cellular processes                   | Cell division                                                           | Chain length regulator (capsular polysaccharide biosynthesis)                            | 0.921 | 0.045 | 1.354 | 0.019 | 0.822  | 0.005 |
| 1030270 | COG4464GM     | gbs1246   | cpsB   | Cell Envelope                        | Biosynthesis and degradation of surface polysaccharides and lipopolysac | Phosphotyrosine-protein phosphatase (capsular polysaccharide biosynthesis) (EC 3.1.3.48) | 0.901 | 0.005 | 1.311 | 0.004 | 0.720  | 0.242 |
| 1030271 | COG1316K      | gbs1247   | cpsA   | Cellular processes                   | Transcription                                                           | Transcriptional activator CpsA                                                           | 1.047 | 0.191 | 1.266 | 0.012 | 0.973  | 0.871 |
| 1030274 | COG0583K      | gbs1248   | cpsY   | Cellular processes                   | Transcription                                                           | Transcriptional regulators, LysR family                                                  | 0.630 | 0.000 | 0.707 | 0.000 | 0.713  | 0.040 |
| 1030275 | -             | gbs1250   | cpsX   | Cellular processes                   | Signal transduction                                                     | Histidine protein kinase                                                                 | 1.169 | 0.010 | 1.125 | 0.010 | 0.772  | 0.018 |
| 1030276 | COG0813F      | gbs1251   | deoD2  | Metabolism and transport             | Purines, pyrimidines, nucleosides, and nucleotides                      | Purine nucleoside phosphorylase (EC 2.4.2.1)                                             | 1.093 | 0.052 | 1.074 | 0.003 | 0.964  | 0.322 |
| 1030273 | COG0038P      | gbs1252   |        | Metabolism and transport             | Inorganic ion transport and metabolism                                  | Chloride channel protein                                                                 | 0.972 | 0.274 | 1.035 | 0.020 | 1.048  | 0.544 |
| 1030279 | COG0005F      | gbs1253   | punA   | Metabolism and transport             | Purines, pyrimidines, nucleosides, and nucleotides                      | Purine nucleoside phosphorylase (EC 2.4.2.1)                                             | 0.981 | 0.549 | 0.976 | 0.491 | 1.239  | 0.131 |
| 1030278 | COG1393P      | gbs1254   | arsC   | Metabolism and transport             | Inorganic ion transport and metabolism                                  | Arsenate reductase (EC 1.20.4.1)                                                         | 0.961 | 0.358 | 1.076 | 0.091 | 1.039  | 0.587 |
| 1030280 | COG1015G      | gbs1255   |        | Metabolism and transport             | Carbohydrates, organic alcohols, and acids                              | Phosphopentomutase (EC 5.4.2.7)                                                          | 1.221 | 0.074 | 0.979 | 0.718 | 0.918  | 0.306 |
| 1030277 | COG0120G      | gbs1256   | rpIA   | Metabolism and transport             | Carbohydrates, organic alcohols, and acids                              | Ribose 5-phosphate isomerase (EC 5.3.1.6)                                                | 0.892 | 0.052 | 1.134 | 0.124 | 1.184  | 0.179 |
| 1030282 | COG5549O      | gbs1257   |        | Cellular processes                   | Posttranslational modification, protein turnover, chaperones            | Endopeptidase, M10 family (EC 3.4.24.-)                                                  | 3.049 | 0.000 | 1.695 | 0.008 | 1.681  | 0.002 |
| 1030281 | COG0627R      | gbs1258   | estA   | General function predicted only      |                                                                         | Acetyl esterase (EC 3.1.1.-)                                                             | 1.920 | 0.015 | 1.136 | 0.027 | 2.121  | 0.002 |
| 1030283 | COG0595R      | gbs1259   |        | General function predicted only      |                                                                         | Zn-dependent hydrolase (EC 3.-.-.-)                                                      | 0.957 | 0.460 | 0.953 | 0.360 | 1.270  | 0.086 |
| 1030287 | COG1101R      | gbs1260   |        | Transport and binding proteins       | Unknown substrate                                                       | ABC transporter ATP-binding protein                                                      | 0.902 | 0.184 | 1.373 | 0.003 | 0.375  | 0.001 |
| 1030288 | COG4120R      | gbs1261   |        | Transport and binding proteins       | Unknown substrate                                                       | ABC transporter permease protein                                                         | 0.846 | 0.224 | 1.223 | 0.036 | 0.419  | 0.002 |
| 1030290 | COG2984R      | gbs1262   |        | Transport and binding proteins       | Unknown substrate                                                       | ABC transporter substrate-binding protein                                                | 0.845 | 0.201 | 1.128 | 0.059 | 0.464  | 0.118 |
| 1030285 | COG1293K      | gbs1263   | fbp    | Cell Envelope                        | Other                                                                   | Fibrinectin-binding protein Fibrinogen-binding protein                                   | 1.453 | 0.004 | 1.238 | 0.006 | 2.806  | 0.004 |
| 1030284 | COG3527Q      | gbs1264   |        | Metabolism and transport             | Secondary metabolites                                                   | Alpha-acetolactate decarboxylase (EC 4.1.1.5)                                            | 1.581 | 0.008 | 1.558 | 0.002 | 0.784  | 0.021 |
| 1030291 | COG0028EH     | gbs1265   |        | Metabolism and transport             | Amino acids, peptides, aminosugars and amines                           | Acetolactate synthase (EC 2.2.1.6)                                                       | 1.283 | 0.012 | 1.180 | 0.012 | 0.846  | 0.028 |
| 1030293 | -             | gbs1266   |        | Hypothetical                         |                                                                         | Tetratricopeptide repeat family protein                                                  | 1.322 | 0.005 | 1.529 | 0.005 | 0.716  | 0.041 |
| 1030289 | COG0628R      | gbs1267   |        | Hypothetical                         |                                                                         | Hypothetical membrane spanning protein                                                   | 2.408 | 0.015 | 1.848 | 0.019 | 0.498  | 0.078 |
| 1030295 | COG0494LR     | gbs1268   |        | Cellular processes                   | DNA replication, recombination and repair                               | Phosphohydrolase (MuT nudix family protein)                                              | 1.733 | 0.005 | 1.650 | 0.005 | 0.796  | 0.007 |
| 1030296 | COG0494LR     | gbs1269   |        | General function predicted only      |                                                                         | 7,8-dihydro-8-oxoguanine-triphosphatase (EC 3.6.1.-)                                     | 1.502 | 0.000 | 1.594 | 0.000 | 0.851  | 0.305 |
| 1030294 | -             | gbs1270   |        | General function predicted only      |                                                                         | Hyaluronate lyase precursor (EC 4.2.2.1)                                                 | 0.888 | 0.378 | 1.002 | 0.988 | 1.157  | 0.323 |
| 1030292 | COG1088M      | gbs1271   | cpsFQ  | Metabolism and transport             | Carbohydrates, organic alcohols, and acids                              | dTDP-glucose 4,6-dehydratase (EC 4.2.1.46)                                               | 0.833 | 0.024 | 1.030 | 0.529 | 0.847  | 0.318 |
| 1030299 | COG1898M      | gbs1272   | rmlC   | Metabolism and transport             | Carbohydrates, organic alcohols, and acids                              | dTDP-4-dehydrothamnose 3,5-epimerase (EC 5.1.3.13)                                       | 0.972 | 0.460 | 1.051 | 0.271 | 0.771  | 0.061 |
| 1030298 | COG1209M      | gbs1273   | rmlA   | Metabolism and transport             | Carbohydrates, organic alcohols, and acids                              | Glucose-1-phosphate thymidyltransferase (EC 2.7.7.24)                                    | 0.965 | 0.571 | 1.019 | 0.464 | 0.702  | 0.016 |
| 1030300 | COG0665E      | gbs1274   |        | Metabolism and transport             | Amino acids, peptides, aminosugars and amines                           | Glycine D-amino acid oxidases family                                                     | 0.976 | 0.717 | 1.163 | 0.075 | 0.605  | 0.071 |
| 1030297 | COG0327S      | gbs1275   |        | General function predicted only      |                                                                         | NIF3-related protein                                                                     | 0.860 | 0.032 | 1.154 | 0.013 | 0.809  | 0.233 |
| 1030303 | COG2384R      | gbs1276   |        | Hypothetical                         |                                                                         | Hypothetical cytosolic protein                                                           | 1.020 | 0.262 | 1.204 | 0.001 | 0.667  | 0.044 |
| 1030302 | COG3935L      | gbs1277   | dnaD   | Cellular processes                   | DNA replication, recombination and repair                               | DNA replication protein dnaD                                                             | 0.923 | 0.054 | 1.456 | 0.009 | 2.048  | 0.025 |
| 1030304 | COG0503F      | gbs1278   | apt    | Metabolism and transport             | Purines, pyrimidines, nucleosides, and nucleotides                      | Adenine phosphoribosyltransferase (EC 2.4.2.7)                                           | 0.889 | 0.126 | 1.593 | 0.000 | 1.189  | 0.097 |
| 1030301 | -             | gbs1279   |        | Cell Envelope                        | Other                                                                   | M protein                                                                                | 0.970 | 0.535 | 0.627 | 0.000 | 0.548  | 0.080 |
| 1030307 | COG0608L      | gbs1280   | recJ   | Cellular processes                   | DNA replication, recombination and repair                               | Single-stranded-DNA-specific exonuclease recJ (EC 3.1.-.-)                               | 0.672 | 0.013 | 0.871 | 0.009 | 0.951  | 0.729 |
| 1030308 | COG0300R      | gbs1281   |        | Metabolism and transport             | Central intermediary metabolism                                         | Short chain dehydrogenase                                                                | 0.922 | 0.067 | 1.081 | 0.186 | 1.136  | 0.333 |
| 1030306 | COG1234R      | gbs1282   | elaC   | Cellular processes                   | Transcription                                                           | Ribonuclease Z (EC 3.1.26.11)                                                            | 0.824 | 0.004 | 0.997 | 0.917 | 0.980  | 0.834 |
| 1030305 | -             | gbs1283   |        | Metabolism and transport             | Carbohydrates, organic alcohols, and acids                              | galactose 1-phosphate uridylyltransferase                                                | 0.850 | 0.013 | 0.904 | 0.172 | 1.059  | 0.497 |
| 1030311 | COG2262R      | gbs1284   | hflX   | General function predicted only      |                                                                         | GTP-binding protein hflX                                                                 | 1.018 | 0.266 | 0.951 | 0.249 | 0.840  | 0.036 |
| 1030309 | COG0324J      | gbs1285   | miaA   | Cellular processes                   | Translation, ribosomal structure and biogenesis                         | tRNA delta(2)-isopentenylpyrophosphate transferase (EC 2.5.1.8)                          | 0.732 | 0.001 | 0.721 | 0.002 | 0.913  | 0.350 |
| 1030310 | -             | gbs1286   |        | Hypothetical                         |                                                                         | Hypothetical protein                                                                     | 4.380 | 0.003 | 2.657 | 0.003 | 0.569  | 0.137 |
| 1030314 | COG1275P      | gbs1287   | exfA   | Hypothetical                         |                                                                         | Hypothetical membrane-spanning protein                                                   | 0.731 | 0.005 | 0.745 | 0.044 | 0.765  | 0.084 |
| 1030315 | COG1523G      | gbs1288   |        | Metabolism and transport             | Carbohydrates, organic alcohols, and acids                              | LPXTG Pullulanase (EC 3.2.1.41)                                                          | 0.448 | 0.145 | 0.652 | 0.324 | 0.246  | 0.027 |
| 1030313 | COG1387ER     | gbs1289   |        | Metabolism and transport             | Amino acids, peptides, aminosugars and amines                           | Histidinol-phosphatase (EC 3.1.3.15)                                                     | 2.014 | 0.009 | 1.068 | 0.414 | 1.386  | 0.028 |
| 1030312 | COG1573L      | gbs1290   |        | Cellular processes                   | DNA replication, recombination and repair                               | Uracil DNA glycosylase superfamily protein                                               | 1.676 | 0.003 | 1.106 | 0.089 | 1.819  | 0.000 |
| 1030317 | COG0624E      | gbs1291   |        | Metabolism and transport             | Amino acids, peptides, aminosugars and amines                           | Xaa-His dipeptidase (EC 3.4.13.3)                                                        | 1.305 | 0.006 | 1.237 | 0.002 | 1.044  | 0.210 |
| 1030316 | COG0778C      | gbs1292   |        | Metabolism and transport             | Energy production and conversion                                        | NAD(P)H-dependent quinone reductase (EC 1.-.-.-)                                         | 1.252 | 0.002 | 1.261 | 0.014 | 1.700  | 0.009 |
| 1030319 | COG0584C, COG | gbs1293   |        | Metabolism and transport             | Energy production and conversion                                        | glycerophosphoryl diester phosphodiesterase                                              | 0.896 | 0.040 | 0.838 | 0.027 | 1.520  | 0.022 |
| 1030322 | COG0322L      | gbs1294   | uvrC   | Cellular processes                   | DNA replication, recombination and repair                               | Excinuclease ABC subunit C                                                               | 1.127 | 0.205 | 1.373 | 0.001 | 0.941  | 0.537 |
| 1030320 | COG1636S      | gbs1295   |        | Hypothetical                         |                                                                         | Hypothetical cytosolic protein                                                           | 0.689 | 0.001 | 0.877 | 0.035 | 1.276  | 0.347 |
| 1030321 | COG0534V      | gbs1296   |        | Cellular processes                   | Toxin production and resistance                                         | Na+ driven multidrug efflux pump                                                         | 1.082 | 0.166 | 0.964 | 0.465 | 1.166  | 0.059 |
| 1030318 | COG2764S      | gbs1297   |        | Metabolism and transport             | Energy production and conversion                                        | PhnB protein                                                                             | 1.723 | 0.000 | 1.261 | 0.026 | 2.336  | 0.000 |
| 1030327 | -             | gbs1298   |        | Hypothetical                         |                                                                         | hypothetical protein                                                                     | 1.645 | 0.001 | 1.161 | 0.011 | 2.763  | 0.002 |
| 1030325 | -             | gbs1299   |        | Mobile and extrachromosomal elements |                                                                         | PUTATIVE HOST CELL SURFACE-EXPOSED LIPOPROTEIN                                           | 1.974 | 0.000 | 1.407 | 0.003 | 0.666  | 0.057 |
| 1030323 | COG2801L      | gbs1301   |        | Mobile and extrachromosomal elements |                                                                         | Transposase                                                                              | 1.197 | 0.231 | 0.890 | 0.191 | 0.797  | 0.229 |
| 1030324 | -             | gbs1302   |        | Mobile and extrachromosomal elements |                                                                         | Transposase                                                                              | 0.837 | 0.568 | 0.807 | 0.684 | 0.165  | 0.344 |
| 1030329 | -             | gbs1306   |        | Mobile and extrachromosomal elements |                                                                         | Streptococcal histidine triad protein                                                    | 0.742 | 0.054 | 1.619 | 0.008 | 21.668 | 0.005 |
| 1030333 | COG0803P      | gbs1307   | Imb    | Metabolism and transport             | Inorganic ion transport and metabolism                                  | Laminin-binding surface protein                                                          | 0.769 | 0.196 | 1.352 | 0.046 | 4.855  | 0.012 |
| 1030336 | COG1404O      | gbs1308   | scpB   | Cellular processes                   | Posttranslational modification, protein turnover, chaperones            | LPXTN CSA peptidase precursor (EC 3.4.21.-)                                              | 0.722 | 0.005 | 0.494 | 0.000 | 0.674  | 0.035 |
| 1030332 | COG2176L      | gbs1312   |        | Hypothetical                         |                                                                         | Hypothetical protein                                                                     | 1.320 | 0.028 | 0.937 | 0.432 | 1.366  | 0.101 |
| 1030342 | -             | gbs1313   |        | Hypothetical                         |                                                                         | Hypothetical protein                                                                     | 1.090 | 0.119 | 0.960 | 0.406 | 0.827  | 0.053 |
| 1030339 | COG0582L      | gbs1314   |        | Mobile and extrachromosomal elements |                                                                         | DNA integration recombination inversion protein                                          | 0.471 | 0.000 | 0.741 | 0.000 | 1.594  | 0.014 |
| 1030338 | -             | gbs1315   |        | Hypothetical                         |                                                                         | Hypothetical protein                                                                     | 0.264 | 0.003 | 0.502 | 0.030 | 1.718  | 0.003 |
| 1030351 | -             | gbs1316   |        | Mobile and extrachromosomal elements |                                                                         | Replication protein                                                                      | 0.440 | 0.021 | 0.937 | 0.749 | 0.565  | 0.331 |
| 1030348 | -             | gbs1318   |        | Hypothetical                         |                                                                         | Hypothetical protein                                                                     | 0.302 | 0.013 | 0.188 | 0.116 | 0.587  | 0.597 |
| 1030343 | COG1674D      | gbs1320   |        | Cellular processes                   | Cell division                                                           | FtsK SpoIIIE family                                                                      | 0.261 | 0.018 | 1.043 | 0.959 | 1.172  | 0.776 |
| 1030357 | -             | gbs1321   |        | Hypothetical                         |                                                                         | Hypothetical protein                                                                     | 0.722 | 0.119 | 0.985 | 0.948 | 0.498  | 0.174 |
| 1030354 | -             | gbs1322   |        | Hypothetical                         |                                                                         | Hypothetical protein                                                                     | 1.176 | 0.095 | 1.623 | 0.000 | 0.669  | 0.031 |
| 1030361 | -             | gbs1323   |        | Hypothetical                         |                                                                         | Hypothetical protein                                                                     |       |       |       |       |        |       |

|         |               |         |        |                                      |                                                              |                                                                                             |       |       |       |       |       |       |
|---------|---------------|---------|--------|--------------------------------------|--------------------------------------------------------------|---------------------------------------------------------------------------------------------|-------|-------|-------|-------|-------|-------|
| 1030368 | COG2017G      | gbs1328 |        | Metabolism and transport             | Carbohydrates, organic alcohols, and acids                   | Aldose 1-epimerase family protein                                                           | 0.692 | 0.172 | 0.837 | 0.720 | 1.569 | 0.482 |
| 1030367 | -             | gbs1329 | lacG   | Metabolism and transport             | Carbohydrates, organic alcohols, and acids                   | 6-phospho-beta-galactosidase (EC 3.2.1.85)                                                  | 0.993 | 0.964 | 0.955 | 0.811 | 2.052 | 0.006 |
| 1030369 | COG1455G      | gbs1330 | lacE   | Metabolism and transport             | Carbohydrates, organic alcohols, and acids                   | PTS system, lactose-specific IIB component (EC 2.7.1.69)                                    | 0.710 | 0.059 | 0.918 | 0.740 | 3.082 | 0.001 |
| 1030366 | -             | gbs1331 | lacF   | Metabolism and transport             | Carbohydrates, organic alcohols, and acids                   | PTS system, lactose-specific IIA component (EC 2.7.1.69)                                    | 1.107 | 0.708 | 1.205 | 0.787 | 1.030 | 0.947 |
| 1030373 | COG3711K      | gbs1332 |        | Cellular processes                   | Transcription                                                | Transcription antiterminator                                                                | 1.156 | 0.493 | 1.239 | 0.562 | 1.975 | 0.039 |
| 1030371 | COG3684G      | gbs1333 | lacD.2 | Metabolism and transport             | Carbohydrates, organic alcohols, and acids                   | Tagatose-bisphosphate aldolase (EC 4.1.2.40)                                                | 1.212 | 0.214 | 0.699 | 0.029 | 1.345 | 0.099 |
| 1030372 | COG1105G      | gbs1334 | lacC.2 | Metabolism and transport             | Carbohydrates, organic alcohols, and acids                   | Tagatose-6-phosphate kinase (EC 2.7.1.144)                                                  | 0.954 | 0.725 | 0.723 | 0.024 | 0.922 | 0.793 |
| 1030370 | COG0698G      | gbs1335 | lacB.1 | Metabolism and transport             | Carbohydrates, organic alcohols, and acids                   | Galactose-6-phosphate isomerase lacB subunit (EC 5.3.1.26)                                  | 1.203 | 0.063 | 0.644 | 0.087 | 0.985 | 0.874 |
| 1030376 | COG0698G      | gbs1336 | lacA.2 | Metabolism and transport             | Carbohydrates, organic alcohols, and acids                   | Galactose-6-phosphate isomerase lacA subunit (EC 5.3.1.26)                                  | 1.264 | 0.041 | 0.939 | 0.717 | 0.978 | 0.872 |
| 1030375 | COG1349KG     | gbs1337 |        | Cellular processes                   | Transcription                                                | Lactose phosphotransferase system repressor                                                 | 0.890 | 0.216 | 0.844 | 0.055 | 2.926 | 0.002 |
| 1030378 | COG3843U      | gbs1338 | srtI   | General function predicted only      |                                                              | Relaxase                                                                                    | 1.237 | 0.104 | 0.972 | 0.888 | 0.581 | 0.567 |
| 1030374 | -             | gbs1339 |        | Mobile and extrachromosomal elements |                                                              | Mobilisation protein                                                                        | 0.470 | 0.026 | 0.573 | 0.277 | 0.195 | 0.343 |
| 1030381 | -             | gbs1340 |        | Hypothetical                         |                                                              | Hypothetical protein                                                                        | 0.574 | 0.008 | 0.766 | 0.058 | 0.317 | 0.090 |
| 1030379 | COG0210L      | gbs1341 |        | Cellular processes                   | DNA replication, recombination and repair                    | DNA helicase II (EC 3.6.1.-)                                                                | 0.662 | 0.001 | 0.822 | 0.017 | 0.601 | 0.002 |
| 1030380 | COG3593L      | gbs1342 |        | Hypothetical                         |                                                              | Hypothetical protein                                                                        | 0.913 | 0.224 | 0.809 | 0.117 | 0.413 | 0.066 |
| 1030377 | -             | gbs1343 |        | Cellular processes                   | Toxin production and resistance                              | Hypothetical protein                                                                        | 0.785 | 0.017 | 0.757 | 0.025 | 0.495 | 0.001 |
| 1030384 | COG1396K      | gbs1344 |        | Cellular processes                   | Transcription                                                | Transcriptional regulator, Cro CI family                                                    | 0.748 | 0.009 | 0.777 | 0.002 | 0.647 | 0.127 |
| 1030383 | -             | gbs1345 |        | Hypothetical                         |                                                              | Hypothetical protein                                                                        | 0.340 | 0.048 | 0.303 | 0.054 | 0.238 | 0.004 |
| 1030382 | -             | gbs1346 |        | Hypothetical                         |                                                              | Hypothetical protein                                                                        | 0.581 | 0.013 | 0.318 | 0.018 | 0.795 | 0.079 |
| 1030388 | -             | gbs1347 |        | Hypothetical                         |                                                              | Hypothetical protein                                                                        | 0.823 | 0.350 | 0.260 | 0.003 | 0.617 | 0.161 |
| 1030387 | -             | gbs1348 |        | General function predicted only      |                                                              | LtrC-like protein                                                                           | 0.551 | 0.023 | 0.346 | 0.025 | 0.872 | 0.144 |
| 1030386 | -             | gbs1349 |        | Hypothetical                         |                                                              | Hypothetical protein                                                                        | 0.780 | 0.102 | 0.604 | 0.007 | 0.864 | 0.105 |
| 1030391 | -             | gbs1350 |        | Hypothetical                         |                                                              | Hypothetical protein                                                                        | 0.856 | 0.061 | 0.645 | 0.001 | 0.985 | 0.946 |
| 1030390 | -             | gbs1351 |        | Hypothetical                         |                                                              | Hypothetical protein                                                                        | 0.865 | 0.132 | 0.688 | 0.015 | 0.891 | 0.204 |
| 1030392 | COG0553KL, CO | gbs1352 |        | General function predicted only      |                                                              | Superfamily II DNA and RNA helicase (SNF2 family)                                           | 0.769 | 0.106 | 0.810 | 0.261 | 0.557 | 0.047 |
| 1030389 | -             | gbs1353 |        | General function predicted only      |                                                              | Superfamily II DNA and RNA helicase (SNF2 family)                                           | 0.143 | 0.015 | 0.817 | 0.706 | 0.165 | 0.129 |
| 1030397 | -             | gbs1354 |        | Hypothetical                         |                                                              | Hypothetical protein                                                                        | 0.320 | 0.002 | 0.938 | 0.905 | 0.484 | 0.349 |
| 1030395 | -             | gbs1355 |        | Hypothetical                         |                                                              | Hypothetical protein                                                                        | 0.141 | 0.001 | 0.807 | 0.484 | 0.754 | 0.775 |
| 1030396 | -             | gbs1356 |        | Cellular processes                   | Toxin production and resistance                              | LPXTG Cell surface protein                                                                  | 0.684 | 0.153 | 0.775 | 0.127 | 0.416 | 0.001 |
| 1030393 | COG5340K      | gbs1357 |        | Mobile and extrachromosomal elements |                                                              | Abortive infection protein AbiEi                                                            | 1.250 | 0.016 | 1.105 | 0.222 | 0.541 | 0.030 |
| 1030401 | COG2253S      | gbs1358 |        | Mobile and extrachromosomal elements |                                                              | Abortive infection protein AbiEii                                                           | 0.965 | 0.198 | 1.089 | 0.272 | 0.691 | 0.001 |
| 1030400 | COG3942R      | gbs1359 |        | Hypothetical                         |                                                              | Hypothetical membrane associated protein                                                    | 0.508 | 0.048 | 0.473 | 0.185 | 0.374 | 0.247 |
| 1030398 | COG3451U      | gbs1360 |        | Hypothetical                         |                                                              | TRSE PROTEIN                                                                                | 0.833 | 0.140 | 1.086 | 0.789 | 0.521 | 0.370 |
| 1030399 | -             | gbs1361 |        | Hypothetical                         |                                                              | Hypothetical protein                                                                        | 0.487 | 0.002 | 0.882 | 0.568 | 0.746 | 0.641 |
| 1030405 | -             | gbs1362 |        | Hypothetical                         |                                                              | Hypothetical protein                                                                        | 0.407 | 0.010 | 0.671 | 0.407 | 0.493 | 0.070 |
| 1030403 | -             | gbs1363 |        | Hypothetical                         |                                                              | Hypothetical protein                                                                        | 0.494 | 0.125 | 0.488 | 0.036 | 0.411 | 0.023 |
| 1030406 | COG3505U      | gbs1364 |        | Mobile and extrachromosomal elements |                                                              | TraG TraD family                                                                            | 0.238 | 0.018 | 0.313 | 0.158 | 0.541 | 0.461 |
| 1030402 | -             | gbs1365 |        | Hypothetical                         |                                                              | Hypothetical protein                                                                        | 0.508 | 0.034 | 1.123 | 0.774 | 0.324 | 0.150 |
| 1030411 | -             | gbs1366 |        | Cellular processes                   | Posttranslational modification, protein turnover, chaperones | CAAX amino terminal protease family                                                         | 0.525 | 0.053 | 0.370 | 0.294 | 0.319 | 0.300 |
| 1030407 | -             | gbs1367 |        | Hypothetical                         |                                                              | Hypothetical protein                                                                        | 0.397 | 0.029 | 1.182 | 0.557 | 0.394 | 0.008 |
| 1030409 | COG1393P      | gbs1368 |        | Metabolism and transport             | Inorganic ion transport and metabolism                       | Arsenate reductase (EC 1.20.4.1)                                                            | 0.145 | 0.018 | 0.229 | 0.085 | 0.584 | 0.398 |
| 1030408 | -             | gbs1369 |        | Hypothetical                         |                                                              | Hypothetical protein                                                                        | 0.617 | 0.048 | 0.639 | 0.311 | 0.544 | 0.013 |
| 1030414 | COG0270L      | gbs1370 |        | Cellular processes                   | DNA replication, recombination and repair                    | DNA-cytosine methyltransferase (EC 2.1.1.37)                                                | 0.506 | 0.096 | 0.482 | 0.099 | 0.223 | 0.244 |
| 1030413 | -             | gbs1371 |        | Cellular processes                   | DNA replication, recombination and repair                    | DNA-cytosine methyltransferase (EC 2.1.1.37)                                                | 0.544 | 0.398 | 3.102 | 0.252 | 1.325 | 0.618 |
| 1030415 | -             | gbs1372 |        | Hypothetical                         |                                                              | IFN-response binding factor 1                                                               | 0.971 | 0.824 | 1.048 | 0.847 | 0.625 | 0.034 |
| 1030412 | -             | gbs1373 |        | Hypothetical                         |                                                              | Hypothetical protein                                                                        | 1.151 | 0.326 | 2.048 | 0.002 | 0.594 | 0.503 |
| 1030417 | COG0222J      | gbs1374 | rplL   | Cellular processes                   | Translation, ribosomal structure and biogenesis              | LSU ribosomal protein L12P (L7 L12)                                                         | 0.816 | 0.035 | 1.146 | 0.045 | 1.130 | 0.182 |
| 1030420 | COG0244J      | gbs1375 | rplJ   | Cellular processes                   | Translation, ribosomal structure and biogenesis              | LSU ribosomal protein L10P                                                                  | 0.854 | 0.013 | 1.232 | 0.003 | 1.014 | 0.893 |
| 1030418 | COG0542O      | gbs1376 | clpL   | Cellular processes                   | Posttranslational modification, protein turnover, chaperones | ATP-dependent endopeptidase clp ATP-binding subunit clpL                                    | 2.726 | 0.001 | 0.908 | 0.497 | 0.216 | 0.011 |
| 1030421 | COG2040E      | gbs1377 | mmuM   | Metabolism and transport             | Amino acids, peptides, aminosugars and amines                | Homocysteine S-methyltransferase (EC 2.1.1.10)                                              | 0.306 | 0.001 | 0.534 | 0.004 | 1.162 | 0.363 |
| 1030419 | COG0833E      | gbs1378 |        | Metabolism and transport             | Amino acids, peptides, aminosugars and amines                | S-methylmethionine permease                                                                 | 0.435 | 0.000 | 0.615 | 0.017 | 0.955 | 0.625 |
| 1030425 | -             | gbs1379 |        | Hypothetical                         |                                                              | Hypothetical protein                                                                        | 0.630 | 0.004 | 0.558 | 0.001 | 1.103 | 0.309 |
| 1030422 | -             | gbs1380 |        | Hypothetical                         |                                                              | Hypothetical protein                                                                        | 0.701 | 0.004 | 0.623 | 0.010 | 1.378 | 0.089 |
| 1030423 | COG1309K      | gbs1381 |        | Cellular processes                   | Transcription                                                | Transcriptional regulator, TetR family                                                      | 1.963 | 0.000 | 1.587 | 0.015 | 0.872 | 0.494 |
| 1030428 | COG0218R      | gbs1382 |        | General function predicted only      |                                                              | GTP-binding protein YihA                                                                    | 1.194 | 0.007 | 1.375 | 0.004 | 0.733 | 0.047 |
| 1030429 | COG1219O      | gbs1383 | clpX   | Cellular processes                   | Posttranslational modification, protein turnover, chaperones | ATP-dependent endopeptidase clp ATP-binding subunit clpX                                    | 1.200 | 0.001 | 1.408 | 0.015 | 0.640 | 0.088 |
| 1030427 | COG0262H      | gbs1384 | dfra   | Metabolism and transport             | Cofactors, prosthetic groups, and carriers                   | Dihydrofolate reductase (EC 1.5.1.3)                                                        | 1.398 | 0.012 | 1.306 | 0.002 | 0.622 | 0.078 |
| 1030432 | -             | gbs1385 | ThyA   | Metabolism and transport             | Purines, pyrimidines, nucleosides, and nucleotides           | Thymidylate synthase (EC 2.1.1.45)                                                          | 1.123 | 0.011 | 1.042 | 0.119 | 0.601 | 0.108 |
| 1030426 | COG3425I      | gbs1386 | mvaS.1 | Metabolism and transport             | Fatty acid and phospholipids                                 | Hydroxymethylglutaryl-CoA synthase (EC 2.3.3.10)                                            | 1.243 | 0.118 | 1.458 | 0.004 | 1.441 | 0.003 |
| 1030434 | COG1257I      | gbs1387 |        | Metabolism and transport             | Fatty acid and phospholipids                                 | 3-hydroxy-3-methylglutaryl-coenzyme A reductase (EC 1.1.1.34) 3-hydroxy-3-methylglutaryl-co | 1.497 | 0.010 | 1.351 | 0.003 | 1.314 | 0.176 |
| 1030433 | -             | gbs1388 |        | Hypothetical                         |                                                              | Hypothetical cytosolic protein                                                              | 0.642 | 0.002 | 0.304 | 0.000 | 1.377 | 0.087 |
| 1030436 | COG1272R      | gbs1389 | hemIII | General function predicted only      |                                                              | Conserved membrane protein (hemolysin III homolog)                                          | 0.558 | 0.001 | 0.301 | 0.000 | 1.575 | 0.005 |
| 1030431 | COG1597R      | gbs1390 |        | Hypothetical                         |                                                              | Hypothetical protein                                                                        | 0.844 | 0.011 | 0.788 | 0.006 | 1.671 | 0.014 |
| 1030437 | COG0435O      | gbs1391 |        | Metabolism and transport             | Central intermediary metabolism                              | Glutathione S-transferase family protein                                                    | 2.420 | 0.000 | 1.161 | 0.272 | 2.487 | 0.000 |
| 1030435 | -             | gbs1392 |        | Hypothetical                         |                                                              | Hypothetical protein                                                                        | 0.723 | 0.018 | 1.337 | 0.005 | 0.677 | 0.004 |
| 1030443 | COG1304C      | gbs1393 |        | Metabolism and transport             | Energy production and conversion                             | Isopentenyl-diphosphate delta-isomerase (EC 5.3.3.2)                                        | 0.670 | 0.001 | 1.267 | 0.031 | 0.777 | 0.090 |
| 1030440 | COG1577I      | gbs1394 | mvaK2  | Metabolism and transport             | Fatty acid and phospholipids                                 | Phosphomevalonate kinase (EC 2.7.4.2)                                                       | 0.781 | 0.004 | 1.150 | 0.005 | 0.695 | 0.011 |
| 1030441 | COG3407I      | gbs1395 | mvaD   | Metabolism and transport             | Fatty acid and phospholipids                                 | Diphosphomevalonate decarboxylase (EC 4.1.1.33)                                             | 0.832 | 0.036 | 1.127 | 0.182 | 0.495 | 0.057 |
| 1030439 | COG1577I      | gbs1396 | mvaK1  | Metabolism and transport             | Fatty acid and phospholipids                                 | Mevalonate kinase (EC 2.7.1.36)                                                             | 0.994 | 0.716 | 1.115 | 0.189 | 0.569 | 0.004 |
| 1030438 | COG0642T      | gbs1397 |        | Cellular processes                   | Signal transduction                                          | Two component system histidine kinase (EC 2.7.3.-)                                          | 1.066 | 0.061 | 0.828 | 0.143 | 1.947 | 0.015 |
| 1030446 | COG0745TK     | gbs1398 |        | Cellular processes                   | Signal transduction                                          | Two-component response regulator                                                            | 0.924 | 0.017 | 0.860 | 0.001 | 1.759 | 0.017 |
| 1030447 | COG2357S      | gbs1399 |        | Metabolism and transport             | Purines, pyrimidines, nucleosides, and nucleotides           | GTP pyrophosphokinase (EC 2.7.6.5)                                                          | 1.006 | 0.894 | 0.796 | 0.097 | 1.437 | 0.208 |
| 1030445 | COG1132V      | gbs1400 |        | Cellular processes                   | Toxin production and resistance                              | Multidrug protein lipid ABC transporter family, ATP-binding and permease protein            | 1.606 | 0.001 | 0.553 | 0.003 | 3.585 | 0.000 |
| 1030448 | COG1132V      | gbs1401 |        | Cellular processes                   | Toxin production and resistance                              | Multidrug resistance ABC transporter ATP-binding and permease protein                       | 1.480 | 0.001 | 0.552 | 0.000 | 1.419 | 0.010 |
| 1030444 | COG1846K      | gbs1402 |        | Cellular processes                   | Transcription                                                | Transcriptional regulator, MarR family                                                      | 2.024 | 0.020 | 0.518 | 0.011 | 1.174 | 0.729 |
| 1030452 | COG0737F      | gbs1403 |        | Metabolism and transport             | Purines, pyrimidines, nucleosides, and nucleotides           | LPXTN 5-nucleotidase (EC 3.1.3.5)                                                           | 0.640 | 0.002 | 0.118 | 0.000 | 0.417 | 0.000 |
| 1030451 | -             | gbs1404 | fms    | Cellular processes                   | Posttranslational modification, protein turnover, chaperones | Peptide deformylase (EC 3.5.1.88)                                                           | 1.484 | 0.001 | 2.238 | 0.003 | 1.349 | 0.023 |
| 1030449 | COG0334E      | gbs1405 |        | Metabolism and transport             | Amino acids, peptides, aminosugars and amines                | NADP-specific glutamate dehydrogenase (EC 1.4.1.4)                                          | 2.034 | 0.001 | 2.682 | 0.000 | 1.337 | 0.151 |
| 1030456 | COG3247S      | gbs1406 |        | Hypothetical                         |                                                              | Hypothetical membrane spanning protein                                                      | 3.678 | 0.000 | 1.771 | 0.005 | 1.972 | 0.003 |
| 1030453 | COG1132V      | gbs1407 |        | Cellular processes                   | Toxin production and resistance                              | Multidrug protein lipid ABC transporter family, ATP-binding and permease protein            | 0.923 | 0.136 | 0.882 | 0.046 | 0.589 | 0.031 |
| 1030454 | COG1132V      | gbs1408 |        | Cellular processes                   | Toxin production and resistance                              | Multidrug resistance ABC transporter ATP-binding and permease protein                       | 0.962 | 0.597 | 0.952 | 0.643 | 0.743 | 0.091 |
| 1030461 | -             | gbs1409 |        | Metabolism and transport             | Central intermediary metabolism                              | Acetyltransferase yigM (EC 2.3.1.-)                                                         | 0.722 | 0.002 | 0.890 | 0.021 | 1.092 | 0.223 |
| 1030463 | COG0488R      | gbs1410 |        | Transport and binding proteins       | Unknown substrate                                            | ABC transporter ATP-binding protein uup                                                     | 0.808 | 0.004 | 0.935 | 0.090 | 1.052 | 0.570 |
| 1030458 | COG0617J      | gbs1411 | papS   | Cellular processes                   | Translation, ribosomal structure and biogenesis              | IRNA nucleotidyltransferase (EC 2.7.7.25)                                                   | 0.921 | 0.233 | 0.828 | 0.076 | 0.625 | 0.070 |
| 1030459 | COG1307S      | gbs1412 |        | Metabolism and transport             | Fatty acid and phospholipids                                 | Fatty acid-binding protein, DegV family                                                     | 0.901 | 0.032 | 0.932 | 0.022 | 0.844 | 0.130 |
| 1030462 | -             | gbs1413 |        | Hypothetical                         |                                                              | Hypothetical cytosolic protein                                                              | 1.137 | 0.150 | 0.910 | 0.218 | 0.611 | 0.212 |
| 1030457 | -             | gbs1414 |        | Hypothetical                         |                                                              | Hypothetical protein                                                                        | 1.095 | 0.024 | 1.206 | 0.006 | 0.814 | 0.034 |
| 1030468 | COG4331S      | gbs1415 |        | General function predicted only      |                                                              | CPRD14 PROTEIN                                                                              | 1.502 | 0.002 | 1.456 | 0.002 | 1.566 | 0.045 |
| 1030467 | COG1299G, COG | gbs1416 | fruA   | Metabolism and transport             | Carbohydrates, organic alcohols, and acids                   | PTS system, fructose-specific IIBC component (EC 2.7.1.69)                                  | 0.822 | 0.005 | 1.137 | 0.136 | 2.385 | 0.002 |
| 1030466 | COG1105G      | gbs1417 | fruB   | Metabolism and transport             | Carbohydrates, organic alcohols, and acids                   | 1-phosphofructokinase (EC 2.7.1.56)                                                         | 0.016 | 0.824 | 1.140 | 0.138 | 2.519 | 0.019 |
| 1030465 | COG1349KG     | gbs1418 | fruR   | Cellular processes                   | Transcription                                                | Fructose repressor                                                                          | 1.107 | 0.188 |       |       |       |       |



|         |           |         |       |                                 |                                                                                 |                                                                                         |       |       |       |       |        |       |
|---------|-----------|---------|-------|---------------------------------|---------------------------------------------------------------------------------|-----------------------------------------------------------------------------------------|-------|-------|-------|-------|--------|-------|
| 1030471 | -         | gbs1420 | apbA  | General function predicted only | Metabolism and transport                                                        | LPXTG Choline-binding protein                                                           | 0.851 | 0.011 | 0.994 | 0.854 | 1.198  | 0.074 |
| 1030469 | COG1893H  | gbs1421 | apbA  | Metabolism and transport        | Cofactors, prosthetic groups, and carriers                                      | Ketopantoate reductase PanE ApbA family protein                                         | 0.719 | 0.005 | 0.982 | 0.559 | 1.147  | 0.113 |
| 1030475 | COG3641R  | gbs1422 |       | Hypothetical                    |                                                                                 | Hypothetical membrane spanning protein                                                  | 0.828 | 0.061 | 1.040 | 0.414 | 1.374  | 0.174 |
| 1030473 | COG0492O  | gbs1423 | trxB  | Metabolism and transport        | Energy production and conversion                                                | Thioredoxin reductase (EC 1.8.1.9)                                                      | 0.639 | 0.001 | 1.135 | 0.057 | 1.175  | 0.499 |
| 1030474 | -         | gbs1424 | trmD  | Cellular processes              | Translation, ribosomal structure and biogenesis                                 | IRNA (Guanine-N(1)-)-methyltransferase (EC 2.1.1.31)                                    | 0.728 | 0.002 | 1.137 | 0.122 | 1.008  | 0.944 |
| 1030477 | COG0806J  | gbs1425 | rimM  | Cellular processes              | Translation, ribosomal structure and biogenesis                                 | 16S rRNA processing protein rimM                                                        | 0.674 | 0.001 | 1.084 | 0.060 | 0.969  | 0.854 |
| 1030481 | -         | gbs1426 |       | Cellular processes              | Transcription                                                                   | Transcriptional regulator                                                               | 1.231 | 0.040 | 1.465 | 0.008 | 0.869  | 0.040 |
| 1030480 | COG1837R  | gbs1427 |       | General function predicted only | Cellular processes                                                              | RNA binding protein                                                                     | 0.976 | 0.493 | 1.388 | 0.001 | 1.288  | 0.315 |
| 1030482 | -         | gbs1428 | rpsP  | Cellular processes              | Translation, ribosomal structure and biogenesis                                 | SSU ribosomal protein S16P                                                              | 0.869 | 0.007 | 1.202 | 0.010 | 1.454  | 0.193 |
| 1030476 | COG0577V  | gbs1429 |       | Transport and binding proteins  | Unknown substrate                                                               | ABC transporter permease protein                                                        | 1.058 | 0.682 | 1.052 | 0.580 | 1.047  | 0.816 |
| 1030484 | COG1136V  | gbs1430 |       | Transport and binding proteins  | Unknown substrate                                                               | ABC transporter ATP-binding protein                                                     | 0.944 | 0.405 | 1.230 | 0.065 | 1.107  | 0.251 |
| 1030486 | COG0845M  | gbs1431 |       | Cell Envelope                   | Other                                                                           | HlyD family secretion protein                                                           | 0.804 | 0.030 | 1.059 | 0.493 | 1.014  | 0.919 |
| 1030483 | COG0458EF | gbs1432 |       | Metabolism and transport        | Purines, pyrimidines, nucleosides, and nucleotides                              | Carbamoyl-phosphate synthase large chain (EC 6.3.5.5)                                   | 0.738 | 0.004 | 0.688 | 0.002 | 0.763  | 0.081 |
| 1030490 | COG0505EF | gbs1433 |       | Metabolism and transport        | Purines, pyrimidines, nucleosides, and nucleotides                              | Carbamoyl-phosphate synthase small chain (EC 6.3.5.5)                                   | 0.824 | 0.041 | 0.705 | 0.005 | 0.696  | 0.039 |
| 1030487 | COG2065F  | gbs1434 | pyrR  | Metabolism and transport        | Purines, pyrimidines, nucleosides, and nucleotides                              | Uracil phosphoribosyltransferase (EC 2.4.2.9) Pyrimidine operon regulatory protein pyrR | 0.833 | 0.053 | 0.776 | 0.058 | 0.789  | 0.178 |
| 1030488 | COG0564J  | gbs1435 |       | Cellular processes              | Translation, ribosomal structure and biogenesis                                 | Ribosomal large subunit pseudouridine synthase D (EC 4.2.1.70)                          | 0.802 | 0.004 | 0.979 | 0.571 | 1.702  | 0.010 |
| 1030494 | COG0597MU | gbs1436 | isp   | Cellular processes              | Posttranslational modification, protein turnover, chaperones                    | Lipoprotein signal peptidase (EC 3.4.23.36)                                             | 1.022 | 0.658 | 0.982 | 0.602 | 1.489  | 0.092 |
| 1030495 | COG0583K  | gbs1437 |       | Cellular processes              | Transcription                                                                   | Transcriptional regulators, LysR family                                                 | 0.936 | 0.203 | 1.093 | 0.059 | 1.739  | 0.015 |
| 1030493 | -         | gbs1438 | rpmA  | Cellular processes              | Translation, ribosomal structure and biogenesis                                 | LSU ribosomal protein L27P                                                              | 0.847 | 0.001 | 1.206 | 0.008 | 1.402  | 0.024 |
| 1030499 | COG2868J  | gbs1439 |       | General function predicted only | Cellular processes                                                              | hypothetical ribosome-associated protein                                                | 0.796 | 0.020 | 1.093 | 0.088 | 1.688  | 0.006 |
| 1030492 | -         | gbs1440 | rpl21 | Cellular processes              | Translation, ribosomal structure and biogenesis                                 | LSU ribosomal protein L21P                                                              | 0.795 | 0.004 | 1.115 | 0.023 | 1.283  | 0.069 |
| 1030504 | COG2843M  | gbs1441 | capA  | Cell Envelope                   | Biosynthesis and degradation of surface polysaccharides and lipopolysaccharides | Capsule biosynthesis protein capA                                                       | 1.509 | 0.008 | 1.409 | 0.061 | 1.174  | 0.137 |
| 1030505 | COG0301H  | gbs1442 | thil  | Metabolism and transport        | Cofactors, prosthetic groups, and carriers                                      | Thiamine biosynthesis protein thil                                                      | 0.760 | 0.002 | 1.128 | 0.009 | 2.333  | 0.000 |
| 1030502 | COG1104E  | gbs1443 | hifS1 | Metabolism and transport        | Amino acids, peptides, aminosugars and amines                                   | Cysteine desulfurase (EC 2.8.1.7) Selenocysteine lyase (EC 4.4.1.16)                    | 0.796 | 0.023 | 1.101 | 0.056 | 1.556  | 0.022 |
| 1030501 | -         | gbs1444 |       | Hypothetical                    |                                                                                 | Hypothetical protein                                                                    | 1.822 | 0.000 | 1.781 | 0.009 | 0.722  | 0.180 |
| 1030500 | COG1249C  | gbs1445 | gor   | Metabolism and transport        | Energy production and conversion                                                | Glutathione reductase (EC 1.8.1.7)                                                      | 1.938 | 0.000 | 2.050 | 0.001 | 1.556  | 0.006 |
| 1030506 | COG3679S  | gbs1446 |       | Hypothetical                    |                                                                                 | Hypothetical cytosolic protein                                                          | 1.824 | 0.000 | 1.147 | 0.086 | 1.443  | 0.024 |
| 1030507 | -         | gbs1447 | arof  | Metabolism and transport        | Amino acids, peptides, aminosugars and amines                                   | Chorismate synthase (EC 4.2.3.5)                                                        | 0.800 | 0.025 | 0.602 | 0.001 | 3.056  | 0.000 |
| 1030510 | COG0337E  | gbs1448 | arob  | Metabolism and transport        | Amino acids, peptides, aminosugars and amines                                   | 3-dehydroquinate synthase (EC 4.2.3.4)                                                  | 0.780 | 0.004 | 0.634 | 0.004 | 16.082 | 0.004 |
| 1030512 | -         | gbs1449 | arod  | Metabolism and transport        | Amino acids, peptides, aminosugars and amines                                   | 3-dehydroquinate dehydratase (EC 4.2.1.10)                                              | 0.731 | 0.001 | 0.952 | 0.507 | 3.555  | 0.009 |
| 1030508 | COG1092R  | gbs1450 |       | Metabolism and transport        | Central intermediary metabolism                                                 | Methyltransferase (EC 2.1.1.-)                                                          | 1.019 | 0.789 | 0.961 | 0.255 | 2.182  | 0.003 |
| 1030514 | COG1368M  | gbs1451 |       | Metabolism and transport        | Central intermediary metabolism                                                 | Sulfatase family protein                                                                | 1.346 | 0.000 | 1.385 | 0.001 | 1.552  | 0.030 |
| 1030516 | -         | gbs1452 | rplT  | Cellular processes              | Translation, ribosomal structure and biogenesis                                 | LSU ribosomal protein L20P                                                              | 0.868 | 0.023 | 1.339 | 0.011 | 1.169  | 0.492 |
| 1030515 | COG0291J  | gbs1453 | rplM  | Cellular processes              | Translation, ribosomal structure and biogenesis                                 | LSU ribosomal protein L35P                                                              | 0.795 | 0.014 | 1.237 | 0.001 | 0.826  | 0.334 |
| 1030513 | COG0290J  | gbs1454 | infC  | Cellular processes              | Translation, ribosomal structure and biogenesis                                 | Bacterial Protein Translation Initiation Factor 3 (IF-3)                                | 0.855 | 0.001 | 1.120 | 0.138 | 1.319  | 0.032 |
| 1030511 | COG0283F  | gbs1455 | cmk   | Metabolism and transport        | Purines, pyrimidines, nucleosides, and nucleotides                              | Cytidylyl kinase (EC 2.7.4.14)                                                          | 0.900 | 0.005 | 0.976 | 0.640 | 0.671  | 0.026 |
| 1030522 | -         | gbs1456 |       | Hypothetical                    |                                                                                 | Hypothetical membrane associated protein                                                | 0.965 | 0.039 | 0.990 | 0.663 | 0.712  | 0.043 |
| 1030519 | COG1141C  | gbs1457 |       | Metabolism and transport        | Energy production and conversion                                                | Ferredoxin                                                                              | 1.510 | 0.069 | 0.915 | 0.381 | 0.759  | 0.038 |
| 1030518 | -         | gbs1458 | ebaS  | General function predicted only |                                                                                 | Pore forming protein ebaS                                                               | 1.164 | 0.006 | 1.053 | 0.145 | 0.774  | 0.006 |
| 1030517 | COG2195E  | gbs1459 | pepT  | Metabolism and transport        | Amino acids, peptides, aminosugars and amines                                   | Tripeptidase T (EC 3.4.11.4)                                                            | 0.867 | 0.072 | 0.950 | 0.111 | 0.932  | 0.484 |
| 1030526 | COG2244R  | gbs1460 |       | Cell Envelope                   | Biosynthesis and degradation of surface polysaccharides and lipopolysaccharides | Export protein for polysaccharides and teichoic acids                                   | 1.360 | 0.001 | 1.345 | 0.000 | 1.848  | 0.012 |
| 1030524 | COG0769M  | gbs1461 | murE  | Cell Envelope                   | Biosynthesis and degradation of murein sacculus and peptidoglycan               | UDP-N-acetylmuramoyl-L-alanyl-D-glutamate-lysine ligase (EC 6.3.2.7)                    | 0.952 | 0.254 | 1.023 | 0.003 | 1.722  | 0.088 |
| 1030523 | COG1120PH | gbs1462 | thiA  | Metabolism and transport        | Inorganic ion transport and metabolism                                          | Ferrichrome transport ATP-binding protein thiA                                          | 0.601 | 0.006 | 0.483 | 0.002 | 1.545  | 0.096 |
| 1030532 | COG0614P  | gbs1463 | thuD  | Metabolism and transport        | Inorganic ion transport and metabolism                                          | Ferrichrome-binding protein                                                             | 0.463 | 0.002 | 0.537 | 0.002 | 2.593  | 0.001 |
| 1030528 | COG0609P  | gbs1464 | thiB  | Metabolism and transport        | Inorganic ion transport and metabolism                                          | Ferrichrome transport system permease protein thiB                                      | 0.492 | 0.003 | 0.544 | 0.005 | 0.616  | 0.303 |
| 1030533 | COG0609P  | gbs1465 | thiG  | Metabolism and transport        | Inorganic ion transport and metabolism                                          | Ferrichrome transport system permease protein thiG                                      | 0.466 | 0.017 | 0.469 | 0.032 | 4.392  | 0.025 |
| 1030525 | -         | gbs1466 |       | Hypothetical                    |                                                                                 | Hypothetical cytosolic protein                                                          | 1.196 | 0.007 | 1.091 | 0.012 | 1.098  | 0.655 |
| 1030534 | COG1227C  | gbs1467 | ppaC  | Metabolism and transport        | Energy production and conversion                                                | Inorganic pyrophosphatase (EC 3.6.1.1)                                                  | 1.047 | 0.321 | 0.984 | 0.615 | 0.509  | 0.067 |
| 1030531 | COG1180O  | gbs1468 | pfkC  | Metabolism and transport        | Energy production and conversion                                                | Pyruvate formate-lyase activating enzyme (EC 1.97.1.4)                                  | 1.046 | 0.281 | 1.406 | 0.004 | 1.199  | 0.287 |
| 1030539 | COG1253R  | gbs1469 | hlyX  | General function predicted only |                                                                                 | Magnesium and cobalt efflux protein corC                                                | 0.838 | 0.006 | 0.873 | 0.050 | 1.797  | 0.013 |
| 1030537 | -         | gbs1470 |       | Metabolism and transport        | Central intermediary metabolism                                                 | SAM-dependent methyltransferase (EC 2.1.-.-)                                            | 0.880 | 0.063 | 0.849 | 0.030 | 1.280  | 0.224 |
| 1030543 | COG1242R  | gbs1471 |       | General function predicted only |                                                                                 | Radical SAM superfamily protein                                                         | 0.771 | 0.003 | 0.844 | 0.009 | 1.488  | 0.001 |
| 1030536 | COG0671I  | gbs1472 |       | Metabolism and transport        | Fatty acid and phospholipids                                                    | Membrane-associated phospholipid phosphatase                                            | 2.201 | 0.006 | 1.582 | 0.023 | 1.116  | 0.215 |
| 1030535 | COG3601S  | gbs1473 |       | Transport and binding proteins  | Unknown substrate                                                               | Riboflavin transporter                                                                  | 2.033 | 0.002 | 1.446 | 0.006 | 1.299  | 0.138 |
| 1030548 | COG4932M  | gbs1474 | pilC  | hypothetical                    |                                                                                 | LPXTG Hypothetical protein                                                              | 1.332 | 0.020 | 0.930 | 0.139 | 0.844  | 0.034 |
| 1030545 | COG3764M  | gbs1475 |       | Cellular processes              | Posttranslational modification, protein turnover, chaperones                    | Sortase                                                                                 | 1.298 | 0.013 | 0.875 | 0.019 | 1.026  | 0.682 |
| 1030542 | COG3764M  | gbs1476 |       | Cellular processes              | Posttranslational modification, protein turnover, chaperones                    | Sortase                                                                                 | 1.226 | 0.060 | 0.825 | 0.008 | 1.182  | 0.229 |
| 1030552 | -         | gbs1477 | pilB  | Hypothetical                    |                                                                                 | IPXTG Cell wall surface anchor family protein                                           | 1.078 | 0.181 | 1.073 | 0.060 | 1.228  | 0.101 |
| 1030551 | COG4932M  | gbs1478 | pilA  | Cell Envelope                   | Other                                                                           | IPXTG Collagen adhesion protein                                                         | 1.080 | 0.152 | 0.863 | 0.011 | 0.762  | 0.025 |
| 1030555 | -         | gbs1479 | rogB  | Cellular processes              | Transcription                                                                   | Transcriptional regulator RogB                                                          | 1.431 | 0.002 | 0.743 | 0.019 | 1.056  | 0.858 |
| 1030549 | COG0438M  | gbs1480 |       | Cell Envelope                   | Biosynthesis and degradation of surface polysaccharides and lipopolysaccharides | N-acetylglucosaminyl-phosphatidylinositol biosynthetic protein                          | 0.814 | 0.010 | 1.309 | 0.000 | 2.418  | 0.007 |
| 1030556 | COG1216R  | gbs1481 |       | General function predicted only |                                                                                 | dTDP-rhamnosyl transferase rbfF (EC 2.-.-.-)                                            | 0.829 | 0.000 | 1.238 | 0.002 | 2.907  | 0.002 |
| 1030557 | COG2244R  | gbs1482 |       | General function predicted only |                                                                                 | Oligosaccharide translocase (flippase)                                                  | 0.876 | 0.031 | 1.257 | 0.005 | 2.501  | 0.001 |
| 1030553 | -         | gbs1483 |       | Hypothetical                    |                                                                                 | Hypothetical protein                                                                    | 0.824 | 0.009 | 1.204 | 0.019 | 2.847  | 0.000 |
| 1030563 | COG0463M  | gbs1484 |       | Metabolism and transport        | Central intermediary metabolism                                                 | Glycosyltransferase involved in cell wall biogenesis (EC 2.4.-.-)                       | 0.861 | 0.019 | 1.232 | 0.000 | 2.322  | 0.000 |
| 1030560 | COG0463M  | gbs1485 |       | Metabolism and transport        | Central intermediary metabolism                                                 | Glycosyltransferase involved in cell wall biogenesis (EC 2.4.-.-)                       | 1.178 | 0.004 | 1.361 | 0.080 | 1.986  | 0.008 |
| 1030566 | COG0451MG | gbs1486 |       | Hypothetical                    |                                                                                 | UDP-D-glucuronate carboxylase (EC 4.1.1.35)                                             | 0.977 | 0.269 | 1.288 | 0.004 | 2.579  | 0.000 |
| 1030559 | COG2111I  | gbs1487 |       | Metabolism and transport        | Fatty acid and phospholipids                                                    | 2-C-methyl-D-erythritol 4-phosphoryl cytidylyltransferase (EC 2.7.7.60)                 | 0.977 | 0.471 | 1.220 | 0.020 | 3.438  | 0.000 |
| 1030567 | COG3475M  | gbs1488 |       | Cell Envelope                   | Biosynthesis and degradation of surface polysaccharides and lipopolysaccharides | Lipooligosaccharide cholinephosphotransferase (EC 2.7.8.-)                              | 0.839 | 0.001 | 1.150 | 0.040 | 2.571  | 0.005 |
| 1030565 | -         | gbs1489 |       | Hypothetical                    |                                                                                 | Hypothetical protein                                                                    | 0.857 | 0.005 | 1.152 | 0.034 | 3.191  | 0.000 |
| 1030564 | COG2456S  | gbs1490 |       | Hypothetical                    |                                                                                 | Hypothetical membrane spanning protein                                                  | 0.779 | 0.051 | 1.122 | 0.052 | 4.854  | 0.000 |
| 1030570 | COG0463M  | gbs1491 |       | Metabolism and transport        | Central intermediary metabolism                                                 | Glycosyltransferase involved in cell wall biogenesis (EC 2.4.-.-)                       | 1.057 | 0.034 | 1.176 | 0.001 | 2.753  | 0.006 |
| 1030568 | COG0463M  | gbs1492 | rgpBc | Cell Envelope                   | Biosynthesis and degradation of murein sacculus and peptidoglycan               | alpha-L-Rha alpha-1,3-L-rhamnosyltransferase (EC 2.4.1.-)                               | 1.003 | 0.940 | 1.204 | 0.068 | 2.738  | 0.001 |
| 1030571 | COG0438M  | gbs1493 | rgpAc | Cell Envelope                   | Biosynthesis and degradation of murein sacculus and peptidoglycan               | alpha-D-GlcNAc alpha-1,2-L-rhamnosyltransferase (EC 2.4.1.-)                            | 1.152 | 0.021 | 1.235 | 0.035 | 2.593  | 0.022 |
| 1030575 | COG1091M  | gbs1494 | rmID  | Metabolism and transport        | Carbohydrates, organic alcohols, and acids                                      | dTDP-4-dehydrohiamose reductase (EC 1.1.1.133)                                          | 1.880 | 0.010 | 1.379 | 0.006 | 0.959  | 0.724 |
| 1030577 | -         | gbs1495 |       | Hypothetical                    |                                                                                 | Hypothetical cytosolic protein                                                          | 0.919 | 0.064 | 1.143 | 0.001 | 0.969  | 0.699 |
| 1030574 | COG0568K  | gbs1496 | rpoD  | Cellular processes              | Transcription                                                                   | RNA polymerase sigma factor rpoD                                                        | 1.025 | 0.331 | 1.177 | 0.083 | 0.636  | 0.047 |
| 1030576 | COG0358L  | gbs1497 | dnaG  | Cellular processes              | DNA replication, recombination and repair                                       | DNA primase (EC 2.7.7.-)                                                                | 0.742 | 0.007 | 0.922 | 0.056 | 0.723  | 0.012 |
| 1030572 | -         | gbs1498 | mscL  | Transport and binding proteins  | Unknown substrate                                                               | Large-conductance mechanosensitive channel                                              | 0.991 | 0.931 | 0.744 | 0.007 | 1.092  | 0.276 |
| 1030581 | COG0828J  | gbs1499 | rpsU  | Cellular processes              | Translation, ribosomal structure and biogenesis                                 | SSU ribosomal protein S21P                                                              | 1.014 | 0.798 | 1.103 | 0.027 | 0.290  | 0.018 |
| 1030579 | COG0727R  | gbs1500 |       | Hypothetical                    |                                                                                 | Hypothetical protein                                                                    | 0.449 | 0.000 | 0.611 | 0.000 | 0.757  | 0.226 |
| 1030580 | COG0834ET | gbs1501 |       | Metabolism and transport        | Amino acids, peptides, aminosugars and amines                                   | Arginine-binding protein                                                                | 1.101 | 0.074 | 0.790 | 0.067 | 0.985  | 0.948 |
| 1030578 | -         | gbs1502 |       | Metabolism and transport        | Amino acids, peptides, aminosugars and amines                                   | Ammonium transporter                                                                    | 0.886 | 0.310 | 0.934 | 0.476 | 1.284  | 0.408 |
| 1030584 | COG0492O  | gbs1503 |       | Cellular processes              | Posttranslational modification, protein turnover, chaperones                    | Oxidoreductase (EC 1.1.1.-)                                                             | 0.918 | 0.359 | 1.165 | 0.284 | 1.528  | 0.462 |
| 1030583 | COG1054R  | gbs1504 |       | Metabolism and transport        | Central intermediary metabolism                                                 | Rhodanese-related sulfurtransferases                                                    | 1.616 | 0.010 | 0.765 | 0.003 | 2.116  | 0.003 |
| 1030582 | -         | gbs1505 |       | Hypothetical                    |                                                                                 | Hypothetical protein                                                                    | 3.498 | 0.010 | 0.969 | 0.783 | 0.944  | 0.805 |
| 1030586 | COG2271G  | gbs1506 |       | Metabolism and transport        | Carbohydrates, organic alcohols, and acids                                      | Transporter                                                                             | 1.717 | 0.066 | 1.074 | 0.654 | 1.997  | 0.006 |
| 1030592 | COG0058G  | gbs1507 | glgP  | Metabolism and transport        | Carbohydrates, organic alcohols, and acids                                      | Maltodextrin phosphorylase (EC 2.4.1.1)                                                 | 0.579 |       |       |       |        |       |

|         |              |         |        |                                 |                                                                   |                                                                                         |       |       |       |       |       |       |
|---------|--------------|---------|--------|---------------------------------|-------------------------------------------------------------------|-----------------------------------------------------------------------------------------|-------|-------|-------|-------|-------|-------|
| 1030599 | COG3833G     | gbs1512 | malG   | Metabolism and transport        | Carbohydrates, organic alcohols, and acids                        | Maltose transport system permease protein malG                                          | 0.770 | 0.009 | 0.761 | 0.006 | 0.686 | 0.022 |
| 1030600 | COG3104E     | gbs1513 |        | Metabolism and transport        | Amino acids, peptides, aminosugars and amines                     | Di- tripeptide transporter                                                              | 1.102 | 0.135 | 0.962 | 0.324 | 1.771 | 0.003 |
| 1030598 | COG0494LR    | gbs1514 |        | Cellular processes              | DNA replication, recombination and repair                         | Phosphohydrolase (MutT nudix family protein)                                            | 0.819 | 0.114 | 1.190 | 0.234 | 0.570 | 0.013 |
| 1030603 | -            | gbs1515 |        | Hypothetical                    |                                                                   | Hypothetical protein                                                                    | 0.581 | 0.000 | 0.929 | 0.113 | 0.645 | 0.104 |
| 1030602 | -            | gbs1516 |        | Hypothetical                    |                                                                   | surface protein Pls                                                                     | 0.457 | 0.000 | 0.964 | 0.648 | 1.073 | 0.686 |
| 1030607 | COG0438M     | gbs1517 |        | Metabolism and transport        | Central intermediary metabolism                                   | Probable poly(Glycerol-phosphate) alpha-glucosyltransferase (EC 2.4.1.52)               | 0.626 | 0.001 | 0.906 | 0.322 | 0.798 | 0.123 |
| 1030610 | COG0653U     | gbs1518 |        | Cellular processes              | Posttranslational modification, protein turnover, chaperones      | Protein translocase subunit secA                                                        | 0.606 | 0.000 | 0.866 | 0.001 | 0.808 | 0.109 |
| 1030609 | -            | gbs1519 |        | Hypothetical                    |                                                                   | Hypothetical protein                                                                    | 0.590 | 0.004 | 0.788 | 0.042 | 1.011 | 0.848 |
| 1030608 | -            | gbs1520 |        | Hypothetical                    |                                                                   | Hypothetical protein                                                                    | 0.504 | 0.000 | 0.816 | 0.001 | 1.077 | 0.274 |
| 1030605 | -            | gbs1521 |        | Hypothetical                    |                                                                   | Hypothetical protein                                                                    | 0.562 | 0.000 | 0.793 | 0.003 | 1.040 | 0.484 |
| 1030604 | COG0201U     | gbs1522 |        | Cellular processes              | Posttranslational modification, protein turnover, chaperones      | Protein translocase subunit secY                                                        | 0.558 | 0.001 | 0.773 | 0.003 | 0.757 | 0.008 |
| 1030612 | -            | gbs1523 |        | Hypothetical                    |                                                                   | Hypothetical protein                                                                    | 0.468 | 0.000 | 0.741 | 0.003 | 0.933 | 0.155 |
| 1030613 | COG0463M     | gbs1524 |        | Metabolism and transport        | Central intermediary metabolism                                   | Glycosyltransferase (EC 2.4.1.-)                                                        | 0.614 | 0.001 | 0.702 | 0.005 | 0.914 | 0.206 |
| 1030614 | COG1442M     | gbs1525 |        | Metabolism and transport        | Central intermediary metabolism                                   | Glycosyl transferase, family 8                                                          | 0.594 | 0.000 | 0.728 | 0.007 | 0.852 | 0.204 |
| 1030611 | COG1442M     | gbs1526 |        | Metabolism and transport        | Central intermediary metabolism                                   | Glycosyl transferase, family 8                                                          | 0.603 | 0.000 | 0.736 | 0.003 | 0.909 | 0.088 |
| 1030617 | COG1442M     | gbs1527 |        | Metabolism and transport        | Central intermediary metabolism                                   | Glycosyl transferase, family 8                                                          | 0.601 | 0.000 | 0.799 | 0.020 | 0.820 | 0.046 |
| 1030616 | -            | gbs1528 |        | Metabolism and transport        | Carbohydrates, organic alcohols, and acids                        | Putative galactofuranosyltransferase (EC 2.4.1.-)                                       | 0.801 | 0.047 | 0.664 | 0.004 | 0.758 | 0.082 |
| 1030619 | -            | gbs1529 |        | Cell Envelope                   |                                                                   | LPXTG Fibronectin-binding protein                                                       | 0.295 | 0.003 | 0.690 | 0.010 | 0.544 | 0.313 |
| 1030615 | -            | gbs1530 | rofA   | Cellular processes              | Transcription                                                     | Transcriptional regulator RogB                                                          | 0.807 | 0.133 | 0.345 | 0.018 | 0.636 | 0.025 |
| 1030621 | COG0556L     | gbs1531 |        | Cellular processes              | DNA replication, recombination and repair                         | Excinuclease ABC subunit B                                                              | 1.718 | 0.000 | 1.747 | 0.007 | 1.173 | 0.234 |
| 1030620 | -            | gbs1532 |        | Cellular processes              | Posttranslational modification, protein turnover, chaperones      | CAAX amino terminal protease family                                                     | 1.308 | 0.000 | 1.124 | 0.104 | 4.208 | 0.005 |
| 1030618 | COG0765E_CO  | gbs1533 | glnP   | Metabolism and transport        | Amino acids, peptides, aminosugars and amines                     | Glutamine-binding protein Glutamine transport system permease protein glnP              | 1.090 | 0.069 | 1.295 | 0.014 | 4.419 | 0.000 |
| 1030623 | COG1126E     | gbs1534 | glnQ   | Metabolism and transport        | Amino acids, peptides, aminosugars and amines                     | Glutamine transport ATP-binding protein glnQ                                            | 1.113 | 0.007 | 1.229 | 0.003 | 4.046 | 0.000 |
| 1030622 | -            | gbs1535 |        | Hypothetical                    |                                                                   | Hypothetical protein                                                                    | 0.633 | 0.000 | 0.629 | 0.013 | 0.566 | 0.012 |
| 1030625 | -            | gbs1536 |        | Hypothetical                    |                                                                   | Hypothetical cytosolic protein                                                          | 1.600 | 0.002 | 1.112 | 0.187 | 2.366 | 0.074 |
| 1030627 | COG0536R     | gbs1537 | obg    | General function predicted only |                                                                   | GTP-binding protein CgtA (probably involved in DNA repair)                              | 1.069 | 0.043 | 1.079 | 0.154 | 2.236 | 0.000 |
| 1030626 | COG2309E     | gbs1538 |        | Metabolism and transport        | Amino acids, peptides, aminosugars and amines                     | Aminopeptidase S (EC 3.4.11.-)                                                          | 0.619 | 0.010 | 0.431 | 0.000 | 1.211 | 0.031 |
| 1030624 | -            | gbs1539 |        | Hypothetical                    |                                                                   | LPXTG Hypothetical protein                                                              | 2.183 | 0.000 | 1.624 | 0.007 | 1.161 | 0.277 |
| 1030630 | -            | gbs1540 |        | Metabolism and transport        | Carbohydrates, organic alcohols, and acids                        | LPXTG Amidase family                                                                    | 0.988 | 0.861 | 0.690 | 0.004 | 1.699 | 0.013 |
| 1030632 | COG1187J     | gbs1541 | rsuA   | Cellular processes              | Translation, ribosomal structure and biogenesis                   | Ribosomal small subunit pseudouridine synthase A (EC 4.2.1.70)                          | 0.692 | 0.009 | 0.564 | 0.000 | 0.943 | 0.688 |
| 1030628 | COG0656R     | gbs1542 |        | General function predicted only |                                                                   | Aldo keto reductase family                                                              | 3.291 | 0.000 | 1.311 | 0.018 | 1.246 | 0.054 |
| 1030633 | COG0778C     | gbs1543 |        | Metabolism and transport        | Energy production and conversion                                  | NAD(PH)-dependent quinone reductase (EC 1.-.-.-)                                        | 1.817 | 0.023 | 1.289 | 0.067 | 0.976 | 0.807 |
| 1030634 | COG0346E     | gbs1544 | gloA   | Metabolism and transport        | Amino acids, peptides, aminosugars and amines                     | Lactoylglutathione lyase (EC 4.4.1.5)                                                   | 2.354 | 0.001 | 1.321 | 0.010 | 0.897 | 0.496 |
| 1030631 | COG0463M     | gbs1545 |        | Metabolism and transport        | Central intermediary metabolism                                   | Bactoprenol glycosyl transferase (EC 2.4.1.-)                                           | 1.487 | 0.001 | 1.042 | 0.382 | 0.807 | 0.016 |
| 1030636 | COG1113E     | gbs1546 |        | Metabolism and transport        | Amino acids, peptides, aminosugars and amines                     | Amino acid permease                                                                     | 0.991 | 0.761 | 1.982 | 0.000 | 0.811 | 0.041 |
| 1030639 | COG0691O     | gbs1547 |        | Cellular processes              | Posttranslational modification, protein turnover, chaperones      | SsrA-binding protein                                                                    | 1.124 | 0.027 | 0.935 | 0.077 | 4.217 | 0.001 |
| 1030635 | COG0557K     | gbs1548 |        | Cellular processes              | DNA replication, recombination and repair                         | Exoribonuclease II (EC 3.1.13.1)                                                        | 1.399 | 0.001 | 0.861 | 0.018 | 2.147 | 0.002 |
| 1030640 | COG1314U     | gbs1549 | secG   | Cellular processes              | Posttranslational modification, protein turnover, chaperones      | Protein translocase subunit secG                                                        | 1.060 | 0.412 | 0.971 | 0.350 | 1.042 | 0.733 |
| 1030641 | -            | gbs1550 |        | Cellular processes              | Toxin production and resistance                                   | Multidrug resistance efflux pump                                                        | 1.120 | 0.011 | 1.388 | 0.000 | 0.915 | 0.311 |
| 1030637 | -            | gbs1551 |        | Hypothetical                    |                                                                   | Hypothetical protein                                                                    | 0.585 | 0.000 | 1.152 | 0.086 | 0.791 | 0.024 |
| 1030638 | COG1131V     | gbs1552 |        | Transport and binding proteins  | Unknown substrate                                                 | ABC transporter ATP-binding protein                                                     | 0.742 | 0.012 | 1.044 | 0.478 | 0.713 | 0.116 |
| 1030643 | COG0237H     | gbs1553 | coaE   | Metabolism and transport        | Cofactors, prosthetic groups, and carriers                        | Dephospho-CoA synthase (EC 2.7.1.24)                                                    | 0.948 | 0.495 | 1.159 | 0.049 | 0.742 | 0.030 |
| 1030644 | COG0266L     | gbs1554 | fpq    | Cellular processes              | DNA replication, recombination and repair                         | Formamidopyrimidine-DNA glycosylase (EC 3.2.2.23)                                       | 0.923 | 0.112 | 1.137 | 0.013 | 0.601 | 0.014 |
| 1030646 | -            | gbs1555 | mutR   | Cellular processes              | Transcription                                                     | Transcriptional regulator                                                               | 1.175 | 0.093 | 1.190 | 0.247 | 0.397 | 0.009 |
| 1030642 | COG5279D     | gbs1556 |        | Cell Envelope                   | Biosynthesis and degradation of murein sacculus and peptidoglycan | S-layer homology domain Putative murein endopeptidase                                   | 1.099 | 0.249 | 0.827 | 0.055 | 1.111 | 0.183 |
| 1030650 | -            | gbs1558 |        | Cellular processes              | Posttranslational modification, protein turnover, chaperones      | CAAX amino terminal protease family                                                     | 1.760 | 0.000 | 1.780 | 0.000 | 2.101 | 0.003 |
| 1030648 | -            | gbs1559 |        | Hypothetical                    |                                                                   | Hypothetical protein                                                                    | 1.288 | 0.005 | 1.253 | 0.003 | 1.097 | 0.386 |
| 1030645 | COG1159R     | gbs1560 | era    | General function predicted only |                                                                   | GTP-binding protein era                                                                 | 1.011 | 0.744 | 0.988 | 0.807 | 1.594 | 0.007 |
| 1030652 | -            | gbs1561 | dgk    | Metabolism and transport        | Fatty acid and phospholipids                                      | Diacylglycerol kinase (EC 2.7.1.107)                                                    | 2.046 | 0.034 | 1.050 | 0.461 | 1.387 | 0.040 |
| 1030653 | COG0319R     | gbs1562 |        | Hypothetical                    |                                                                   | Hypothetical metal-binding protein                                                      | 1.237 | 0.001 | 1.066 | 0.039 | 1.350 | 0.116 |
| 1030651 | COG3315Q     | gbs1563 |        | Metabolism and transport        | Secondary metabolites                                             | Polyketide synthase O-methyltransferase (EC 2.1.1.-)                                    | 0.921 | 0.146 | 0.636 | 0.021 | 2.089 | 0.015 |
| 1030655 | COG0494LR    | gbs1564 |        | Cellular processes              | DNA replication, recombination and repair                         | Phosphohydrolase (MutT nudix family protein)                                            | 1.027 | 0.608 | 0.824 | 0.023 | 2.278 | 0.008 |
| 1030649 | -            | gbs1565 |        | Hypothetical                    |                                                                   | Hypothetical protein                                                                    | 2.327 | 0.010 | 0.927 | 0.523 | 1.063 | 0.707 |
| 1030656 | COG1702T     | gbs1566 | phoH   | Cellular processes              | Signal transduction                                               | PhoH protein                                                                            | 2.053 | 0.026 | 1.903 | 0.000 | 2.478 | 0.024 |
| 1030654 | COG4716S     | gbs1567 |        | General function predicted only |                                                                   | Myosin-crossreactive antigen                                                            | 3.732 | 0.004 | 1.767 | 0.000 | 1.423 | 0.006 |
| 1030661 | -            | gbs1568 |        | Hypothetical                    |                                                                   | Hypothetical cytosolic protein                                                          | 0.940 | 0.120 | 1.106 | 0.050 | 2.388 | 0.000 |
| 1030660 | -            | gbs1569 | msrA.2 | Cellular processes              | Posttranslational modification, protein turnover, chaperones      | Peptide methionine sulfoxide reductase msrA (EC 1.8.4.6)                                | 1.078 | 0.142 | 1.066 | 0.378 | 1.409 | 0.033 |
| 1030658 | COG2996S     | gbs1570 |        | General function predicted only |                                                                   | S1 RNA binding domain                                                                   | 0.749 | 0.002 | 0.980 | 0.234 | 1.682 | 0.012 |
| 1030674 | -            | gbs1571 | frf    | Cellular processes              | Translation, ribosomal structure and biogenesis                   | Ribosome Recycling Factor (RRF)                                                         | 0.718 | 0.000 | 0.860 | 0.611 | 1.166 | 0.211 |
| 1031936 | COG0528F     | gbs1572 | pyrH   | Metabolism and transport        | Purines, pyrimidines, nucleosides, and nucleotides                | Uridylate kinase (EC 2.7.4.-)                                                           | 0.759 | 0.000 | 0.871 | 0.002 | 1.159 | 0.114 |
| 1031802 | COG1124EP    | gbs1573 |        | Metabolism and transport        | Amino acids, peptides, aminosugars and amines                     | Nickel transport ATP-binding protein nikE                                               | 0.687 | 0.007 | 0.691 | 0.039 | 0.755 | 0.068 |
| 1030662 | COG0444EP    | gbs1574 |        | Metabolism and transport        | Amino acids, peptides, aminosugars and amines                     | Nickel transport ATP-binding protein nikD                                               | 0.462 | 0.003 | 0.601 | 0.005 | 0.840 | 0.068 |
| 1031803 | COG1173EP    | gbs1575 |        | Metabolism and transport        | Amino acids, peptides, aminosugars and amines                     | Nickel transport system permease protein nikC                                           | 0.351 | 0.001 | 0.443 | 0.002 | 1.120 | 0.503 |
| 1031800 | COG0601EP    | gbs1576 |        | Metabolism and transport        | Amino acids, peptides, aminosugars and amines                     | Nickel transport system permease protein nikB                                           | 0.411 | 0.021 | 0.702 | 0.156 | 1.453 | 0.317 |
| 1031804 | COG0747E     | gbs1577 |        | Metabolism and transport        | Amino acids, peptides, aminosugars and amines                     | Nickel-binding protein                                                                  | 0.424 | 0.018 | 0.403 | 0.001 | 1.287 | 0.296 |
| 1031806 | -            | gbs1580 |        | Hypothetical                    |                                                                   | Hypothetical protein                                                                    | 0.869 | 0.197 | 0.687 | 0.024 | 1.358 | 0.367 |
| 1031805 | COG1473R     | gbs1581 |        | General function predicted only |                                                                   | Carboxypeptidase, M20(D) family                                                         | 0.818 | 0.009 | 0.731 | 0.004 | 0.845 | 0.754 |
| 1031811 | COG0583K     | gbs1582 |        | Cellular processes              | Transcription                                                     | Transcriptional regulators, LysR family                                                 | 0.745 | 0.009 | 0.665 | 0.024 | 1.124 | 0.600 |
| 1031808 | -            | gbs1583 |        | Hypothetical                    |                                                                   | Integral membrane protein                                                               | 1.198 | 0.179 | 0.815 | 0.120 | 0.904 | 0.731 |
| 1031809 | COG0115EH_CO | gbs1584 |        | Metabolism and transport        | Amino acids, peptides, aminosugars and amines                     | Para-aminobenzoate synthetase component I (EC 6.3.5.8) 4-amino-4-deoxychorismate lyase  | 0.922 | 0.013 | 0.949 | 0.460 | 1.360 | 0.038 |
| 1031807 | COG1674D     | gbs1585 | ftsK   | Cellular processes              | Cell division                                                     | Cell division protein ftsK                                                              | 0.877 | 0.035 | 1.024 | 0.705 | 1.008 | 0.957 |
| 1031813 | COG0652O     | gbs1586 |        | Cellular processes              | Posttranslational modification, protein turnover, chaperones      | Peptidyl-prolyl cis-trans isomerase (EC 5.2.1.8)                                        | 1.155 | 0.242 | 0.940 | 0.025 | 3.143 | 0.002 |
| 1031812 | COG1108P     | gbs1587 | mtsC   | Metabolism and transport        | Inorganic ion transport and metabolism                            | Manganese transport system membrane protein                                             | 0.470 | 0.000 | 0.939 | 0.296 | 0.898 | 0.648 |
| 1031810 | COG1121P     | gbs1588 | mtsB   | Metabolism and transport        | Inorganic ion transport and metabolism                            | Manganese transport system ATP-binding protein                                          | 0.431 | 0.004 | 0.943 | 0.267 | 1.020 | 0.855 |
| 1031817 | COG0803P     | gbs1589 | mtsA   | Metabolism and transport        | Inorganic ion transport and metabolism                            | Manganese-binding protein                                                               | 0.486 | 0.000 | 0.701 | 0.003 | 0.966 | 0.800 |
| 1031815 | COG1321K     | gbs1590 | scarR  | Cellular processes              | Transcription                                                     | Iron-dependent repressor                                                                | 1.010 | 0.793 | 0.944 | 0.700 | 0.675 | 0.012 |
| 1031814 | COG0775F     | gbs1591 | pfs    | Metabolism and transport        | Purines, pyrimidines, nucleosides, and nucleotides                | 5-methylthioadenosine nucleosidase (EC 3.2.2.16) S-adenosylhomocysteine nucleosidase (E | 0.882 | 0.075 | 0.853 | 0.010 | 3.546 | 0.000 |
| 1031818 | -            | gbs1592 |        | Hypothetical                    |                                                                   | Hypothetical membrane associated protein                                                | 1.031 | 0.232 | 0.868 | 0.022 | 2.344 | 0.006 |
| 1031816 | COG0494LR    | gbs1593 |        | Metabolism and transport        | Purines, pyrimidines, nucleosides, and nucleotides                | ADP-ribose pyrophosphatase (EC 3.6.1.13)                                                | 1.052 | 0.217 | 0.919 | 0.068 | 2.778 | 0.000 |
| 1031822 | COG1207M     | gbs1594 | gcaD   | Metabolism and transport        | Amino acids, peptides, aminosugars and amines                     | Glucosamine-1-phosphate acetyltransferase (EC 2.3.1.-) UDP-N-acetylglucosamine pyrophos | 1.073 | 0.061 | 0.909 | 0.030 | 2.165 | 0.000 |
| 1031821 | COG2764S     | gbs1595 |        | Metabolism and transport        | Energy production and conversion                                  | PhnB protein                                                                            | 1.887 | 0.005 | 1.085 | 0.225 | 1.770 | 0.059 |
| 1031819 | COG0346E     | gbs1596 |        | Metabolism and transport        | Amino acids, peptides, aminosugars and amines                     | Lactoylglutathione lyase (EC 4.4.1.5)                                                   | 2.443 | 0.010 | 1.529 | 0.061 | 1.491 | 0.075 |
| 1031820 | COG0673R     | gbs1597 |        | Metabolism and transport        | Central intermediary metabolism                                   | NAD-dependent oxidoreductase                                                            | 1.737 | 0.006 | 1.493 | 0.010 | 1.077 | 0.436 |
| 1031823 | -            | gbs1598 |        | Hypothetical                    |                                                                   | Hypothetical protein                                                                    | 1.304 | 0.005 | 1.246 | 0.008 | 1.336 | 0.069 |
| 1031823 | -            | gbs1598 |        | Hypothetical                    |                                                                   | Hypothetical protein                                                                    | 1.278 | 0.008 | 1.214 | 0.031 | 1.381 | 0.017 |
| 1031837 | -            | gbs1599 |        | Hypothetical                    |                                                                   | Hypothetical protein                                                                    | 1.277 | 0.008 | 1.339 | 0.000 | 1.273 | 0.005 |
| 1031834 | COG1028IQR   | gbs1600 |        | Metabolism and transport        | Fatty acid and phospholipids                                      | Short chain dehydrogenase                                                               | 1.482 | 0.001 | 1.269 | 0.012 | 1.128 | 0.306 |
| 1031833 | -            | gbs1601 |        | Hypothetical                    |                                                                   | Hypothetical protein                                                                    | 1.409 | 0.003 | 1.355 | 0.004 | 1.033 | 0.801 |
| 1031830 | -            | gbs1602 |        | General function predicted only |                                                                   | DNA-binding protein                                                                     | 1.996 | 0.003 | 1.570 | 0.001 | 1.278 | 0.051 |
| 1031824 | -            | gbs1603 |        | Hypothetical                    |                                                                   | Hypothetical protein                                                                    | 1.266 | 0.081 | 1.360 | 0.101 | 1.297 | 0.045 |
| 1031831 | COG1215M     | gbs1605 |        | Metabolism and transport        | Central intermediary metabolism                                   |                                                                                         |       |       |       |       |       |       |

|         |               |         |      |                                      |                                                                             |       |       |       |       |        |       |
|---------|---------------|---------|------|--------------------------------------|-----------------------------------------------------------------------------|-------|-------|-------|-------|--------|-------|
| 1031836 | -             | gbs1607 |      | Hypothetical                         | Hypothetical protein                                                        | 0.729 | 0.023 | 0.684 | 0.000 | 0.589  | 0.021 |
| 1031835 | COG1285S      | gbs1608 |      | Hypothetical                         | Hypothetical protein                                                        | 0.718 | 0.012 | 0.981 | 0.788 | 0.582  | 0.220 |
| 1031844 | -             | gbs1609 |      | Hypothetical                         | Hypothetical protein                                                        | 0.695 | 0.004 | 0.762 | 0.054 | 1.187  | 0.259 |
| 1031843 | COG1114E      | gbs1610 |      | Metabolism and transport             | Branched-chain amino acid transport system carrier protein                  | 0.901 | 0.170 | 1.962 | 0.000 | 4.009  | 0.012 |
| 1031842 | COG0073R, COG | gbs1611 | metG | Cellular processes                   | Translation, ribosomal structure and biogenesis                             | 1.051 | 0.268 | 0.896 | 0.291 | 1.440  | 0.003 |
| 1031845 | COG3615P      | gbs1612 |      | Metabolism and transport             | Inorganic ion transport and metabolism                                      | 1.123 | 0.007 | 1.108 | 0.061 | 1.504  | 0.014 |
| 1031841 | -             | gbs1613 |      | Hypothetical                         | Hypothetical membrane spanning protein                                      | 0.930 | 0.471 | 0.976 | 0.889 | 3.297  | 0.004 |
| 1031846 | COG1455G      | gbs1614 |      | Metabolism and transport             | Carbohydrates, organic alcohols, and acids                                  | 3.012 | 0.004 | 1.165 | 0.165 | 0.700  | 0.107 |
| 1031840 | COG4814R      | gbs1615 |      | General function predicted only      | putative acyltransferases and hydrolases with the alpha beta hydrolase fold | 1.557 | 0.001 | 1.042 | 0.499 | 0.976  | 0.690 |
| 1031848 | COG0708L      | gbs1616 | exoA | Cellular processes                   | DNA replication, recombination and repair                                   | 1.218 | 0.005 | 1.085 | 0.324 | 0.984  | 0.778 |
| 1031847 | COG1393P      | gbs1617 |      | Metabolism and transport             | Inorganic ion transport and metabolism                                      | 1.547 | 0.007 | 1.409 | 0.022 | 2.647  | 0.003 |
| 1031851 | COG0350L      | gbs1618 |      | Metabolism and transport             | Energy production and conversion                                            | 1.747 | 0.002 | 1.408 | 0.001 | 2.128  | 0.001 |
| 1031849 | COG0111HE     | gbs1619 |      | Metabolism and transport             | Carbohydrates, organic alcohols, and acids                                  | 0.723 | 0.008 | 0.406 | 0.001 | 1.012  | 0.897 |
| 1031850 | -             | gbs1620 |      | Metabolism and transport             | Central intermediary metabolism                                             | 0.690 | 0.001 | 0.451 | 0.001 | 0.765  | 0.218 |
| 1031852 | COG1932HE     | gbs1621 | serC | Metabolism and transport             | Amino acids, peptides, aminosugars and amines                               | 0.684 | 0.023 | 0.385 | 0.000 | 1.396  | 0.080 |
| 1031856 | COG3142P      | gbs1622 | cutC | Metabolism and transport             | Inorganic ion transport and metabolism                                      | 1.490 | 0.000 | 1.250 | 0.012 | 0.810  | 0.431 |
| 1031854 | COG0313R      | gbs1623 |      | General function predicted only      | Tetrapyrrole (Corrin Porphyrin) methylase family protein                    | 0.933 | 0.192 | 1.256 | 0.009 | 3.299  | 0.000 |
| 1031853 | COG4467S      | gbs1624 |      | Hypothetical                         | Initiation-control protein                                                  | 0.897 | 0.095 | 1.142 | 0.145 | 3.306  | 0.010 |
| 1031855 | COG0470L      | gbs1625 | dnaX | Cellular processes                   | DNA replication, recombination and repair                                   | 1.009 | 0.702 | 1.181 | 0.045 | 1.726  | 0.018 |
| 1031858 | COG0125F      | gbs1626 | tnk  | Metabolism and transport             | Purines, pyrimidines, nucleosides, and nucleotides                          | 1.070 | 0.030 | 1.184 | 0.052 | 2.091  | 0.001 |
| 1031863 | COG0517R      | gbs1627 |      | Metabolism and transport             | Energy production and conversion                                            | 0.702 | 0.028 | 0.878 | 0.414 | 0.516  | 0.233 |
| 1031860 | COG0410E      | gbs1628 |      | Metabolism and transport             | Amino acids, peptides, aminosugars and amines                               | 0.998 | 0.981 | 0.798 | 0.105 | 0.481  | 0.093 |
| 1031861 | COG0411E      | gbs1629 |      | Metabolism and transport             | Amino acids, peptides, aminosugars and amines                               | 0.794 | 0.212 | 1.123 | 0.541 | 0.922  | 0.892 |
| 1031864 | COG4177E      | gbs1630 |      | Metabolism and transport             | Amino acids, peptides, aminosugars and amines                               | 0.639 | 0.060 | 0.632 | 0.379 | 1.401  | 0.522 |
| 1031862 | COG0559E      | gbs1631 |      | Metabolism and transport             | Amino acids, peptides, aminosugars and amines                               | 0.643 | 0.076 | 1.304 | 0.099 | 0.535  | 0.517 |
| 1031859 | COG0683E      | gbs1632 |      | Metabolism and transport             | Amino acids, peptides, aminosugars and amines                               | 1.005 | 0.952 | 2.089 | 0.037 | 1.231  | 0.716 |
| 1031857 | -             | gbs1633 |      | Hypothetical                         | Hypothetical cytosolic protein                                              | 1.483 | 0.053 | 1.400 | 0.001 | 1.967  | 0.031 |
| 1031870 | COG0740OU     | gbs1634 | clpP | Cellular processes                   | Posttranslational modification, protein turnover, chaperones                | 0.597 | 0.001 | 0.950 | 0.575 | 1.242  | 0.058 |
| 1031867 | COG0035F      | gbs1635 | upp  | Metabolism and transport             | Purines, pyrimidines, nucleosides, and nucleotides                          | 0.925 | 0.281 | 0.975 | 0.436 | 1.880  | 0.003 |
| 1031865 | COG1168E      | gbs1636 |      | Metabolism and transport             | Amino acids, peptides, aminosugars and amines                               | 1.851 | 0.008 | 1.436 | 0.014 | 1.213  | 0.307 |
| 1031866 | COG0219J      | gbs1637 |      | Cellular processes                   | Translation, ribosomal structure and biogenesis                             | 0.499 | 0.004 | 0.605 | 0.000 | 0.633  | 0.113 |
| 1031868 | COG0531E      | gbs1638 |      | Metabolism and transport             | Amino acids, peptides, aminosugars and amines                               | 0.721 | 0.022 | 1.112 | 0.181 | 2.250  | 0.020 |
| 1031872 | COG0569P      | gbs1639 |      | Metabolism and transport             | Inorganic ion transport and metabolism                                      | 1.255 | 0.122 | 1.176 | 0.278 | 1.001  | 0.993 |
| 1031871 | COG0168P      | gbs1640 |      | Metabolism and transport             | Inorganic ion transport and metabolism                                      | 0.959 | 0.486 | 1.134 | 0.106 | 1.092  | 0.332 |
| 1031874 | -             | gbs1641 |      | Hypothetical                         | Hypothetical cytosolic protein                                              | 0.827 | 0.014 | 1.002 | 0.967 | 1.143  | 0.243 |
| 1031876 | COG1187J      | gbs1642 |      | Cellular processes                   | Translation, ribosomal structure and biogenesis                             | 0.982 | 0.649 | 1.065 | 0.344 | 0.813  | 0.248 |
| 1031869 | -             | gbs1643 |      | Cellular processes                   | Cell division                                                               | 0.767 | 0.042 | 0.853 | 0.043 | 0.983  | 0.815 |
| 1031877 | COG1354S      | gbs1644 | scpA | Cellular processes                   | Cell division                                                               | 0.862 | 0.002 | 0.912 | 0.121 | 0.928  | 0.185 |
| 1031878 | -             | gbs1645 |      | Mobile and extrachromosomal elements | DNA integration recombination inversion protein                             | 0.935 | 0.159 | 0.942 | 0.439 | 0.811  | 0.084 |
| 1031875 | COG0517R      | gbs1646 |      | General function predicted only      | CBS domain containing protein                                               | 0.911 | 0.214 | 0.895 | 0.145 | 0.874  | 0.029 |
| 1031882 | COG0622F      | gbs1647 |      | General function predicted only      | putative phosphoserine                                                      | 0.874 | 0.098 | 0.910 | 0.138 | 1.057  | 0.252 |
| 1031879 | COG0127F      | gbs1648 |      | Metabolism and transport             | Xanthosine triphosphate pyrophosphatase (EC 3.6.1.-)                        | 0.801 | 0.009 | 0.903 | 0.005 | 1.161  | 0.311 |
| 1031880 | COG0796M      | gbs1649 | glr  | Cell Envelope                        | Biosynthesis and degradation of murein sacculus and peptidoglycan           | 0.954 | 0.483 | 0.925 | 0.140 | 0.986  | 0.922 |
| 1031873 | COG3763S      | gbs1650 |      | Hypothetical                         | Hypothetical exported protein                                               | 0.970 | 0.340 | 0.942 | 0.072 | 0.602  | 0.034 |
| 1031883 | -             | gbs1651 |      | Hypothetical                         | Hypothetical protein                                                        | 0.239 | 0.001 | 0.963 | 0.830 | 0.977  | 0.977 |
| 1031884 | -             | gbs1652 |      | Cellular processes                   | Transcription                                                               | 1.262 | 0.075 | 1.418 | 0.030 | 2.007  | 0.008 |
| 1031881 | COG0670R      | gbs1653 |      | Hypothetical                         | Integral membrane protein                                                   | 1.358 | 0.004 | 1.230 | 0.000 | 1.347  | 0.001 |
| 1031889 | COG1418R      | gbs1654 |      | Metabolism and transport             | Hydrolase (HAD superfamily)                                                 | 1.629 | 0.000 | 1.209 | 0.003 | 0.959  | 0.355 |
| 1031886 | COG0566J      | gbs1655 |      | Cellular processes                   | Translation, ribosomal structure and biogenesis                             | 0.943 | 0.176 | 1.101 | 0.105 | 2.369  | 0.001 |
| 1031887 | COG1254C      | gbs1656 |      | Metabolism and transport             | Energy production and conversion                                            | 1.810 | 0.001 | 1.029 | 0.747 | 2.263  | 0.001 |
| 1031885 | COG0706U      | gbs1657 |      | Cell Envelope                        | Other                                                                       | 1.293 | 0.001 | 1.662 | 0.000 | 1.497  | 0.024 |
| 1031891 | COG0765E      | gbs1658 |      | Metabolism and transport             | Amino acids, peptides, aminosugars and amines                               | 1.863 | 0.002 | 1.688 | 0.001 | 1.759  | 0.004 |
| 1030732 | COG0834ET     | gbs1659 |      | Metabolism and transport             | Amino acids, peptides, aminosugars and amines                               | 2.023 | 0.006 | 1.796 | 0.000 | 1.394  | 0.093 |
| 1029816 | -             | gbs1660 | amiC | Metabolism and transport             | Amino acids, peptides, aminosugars and amines                               | 1.234 | 0.085 | 0.850 | 0.044 | 0.975  | 0.867 |
| 1031179 | COG0782K      | gbs1661 | greA | Cellular processes                   | Transcription                                                               | 1.064 | 0.436 | 1.268 | 0.003 | 1.379  | 0.112 |
| 1031229 | -             | gbs1662 |      | Hypothetical                         | Hypothetical elongation associated protein                                  | 0.833 | 0.010 | 1.029 | 0.515 | 1.499  | 0.020 |
| 1031232 | -             | gbs1663 |      | Metabolism and transport             | Central intermediary metabolism                                             | 1.069 | 0.373 | 0.912 | 0.243 | 1.233  | 0.069 |
| 1030666 | COG0773M      | gbs1664 | murC | Cell Envelope                        | Biosynthesis and degradation of murein sacculus and peptidoglycan           | 0.861 | 0.004 | 0.885 | 0.122 | 0.835  | 0.244 |
| 1030737 | -             | gbs1665 |      | Hypothetical                         | Hypothetical cytosolic protein                                              | 0.924 | 0.138 | 0.955 | 0.240 | 0.807  | 0.042 |
| 1031231 | COG0553KL     | gbs1666 | snf  | Hypothetical                         | SWF SNF family helicase                                                     | 1.319 | 0.002 | 1.248 | 0.001 | 1.146  | 0.022 |
| 1031116 | COG1160R      | gbs1667 | pgdA | General function predicted only      | GTP-binding protein                                                         | 0.984 | 0.764 | 1.138 | 0.135 | 1.737  | 0.009 |
| 1030812 | COG1484L      | gbs1668 | dnal | Cellular processes                   | DNA replication, recombination and repair                                   | 0.944 | 0.211 | 1.002 | 0.912 | 1.297  | 0.087 |
| 1030665 | COG3611L      | gbs1669 | dnaB | Cellular processes                   | DNA replication, recombination and repair                                   | 0.860 | 0.037 | 0.951 | 0.460 | 1.750  | 0.018 |
| 1030833 | -             | gbs1670 |      | Cellular processes                   | Transcription                                                               | 1.040 | 0.229 | 0.955 | 0.234 | 1.650  | 0.001 |
| 1030601 | COG0642T      | gbs1671 | covS | Cellular processes                   | Signal transduction                                                         | 0.954 | 0.256 | 0.760 | 0.005 | 0.694  | 0.060 |
| 1031230 | COG0745TK     | gbs1672 | covR | Cellular processes                   | Signal transduction                                                         | 1.078 | 0.013 | 1.209 | 0.010 | 1.390  | 0.094 |
| 1031227 | COG1399R      | gbs1673 |      | Hypothetical                         | Hypothetical cytosolic protein                                              | 1.959 | 0.000 | 2.123 | 0.003 | 3.126  | 0.000 |
| 1030606 | COG0501O      | gbs1674 |      | Cellular processes                   | Posttranslational modification, protein turnover, chaperones                | 1.036 | 0.070 | 0.734 | 0.000 | 3.188  | 0.001 |
| 1030706 | -             | gbs1675 | lemA | General function predicted only      | LemA protein                                                                | 1.025 | 0.354 | 0.779 | 0.001 | 2.210  | 0.004 |
| 1030734 | COG0357M      | gbs1676 | gidB | Metabolism and transport             | Methyltransferase gidB (EC 2.1.-)                                           | 1.168 | 0.026 | 1.177 | 0.078 | 3.913  | 0.001 |
| 1030714 | COG0168P      | gbs1677 |      | Metabolism and transport             | Inorganic ion transport and metabolism                                      | 1.301 | 0.036 | 1.227 | 0.148 | 3.937  | 0.003 |
| 1031228 | COG0569P      | gbs1678 |      | Metabolism and transport             | Inorganic ion transport and metabolism                                      | 1.103 | 0.000 | 1.071 | 0.333 | 2.277  | 0.004 |
| 1030689 | COG0619P      | gbs1679 |      | Metabolism and transport             | Inorganic ion transport and metabolism                                      | 0.706 | 0.003 | 1.029 | 0.307 | 3.173  | 0.002 |
| 1030735 | COG1122P      | gbs1680 |      | Metabolism and transport             | Inorganic ion transport and metabolism                                      | 0.782 | 0.002 | 1.015 | 0.826 | 4.865  | 0.007 |
| 1030541 | COG4720S      | gbs1681 |      | Hypothetical                         | Hypothetical protein                                                        | 0.987 | 0.838 | 0.869 | 0.014 | 1.847  | 0.001 |
| 1031530 | COG3633E      | gbs1682 |      | Metabolism and transport             | Serine threonine sodium symporter                                           | 1.185 | 0.054 | 1.128 | 0.187 | 13.155 | 0.004 |
| 1030673 | COG1114E      | gbs1683 | braB | Metabolism and transport             | Branched-chain amino acid transport system carrier protein                  | 0.729 | 0.108 | 1.908 | 0.001 | 1.055  | 0.760 |
| 1031574 | COG1063ER     | gbs1684 |      | Metabolism and transport             | Zn-dependent alcohol dehydrogenases and related dehydrogenases              | 0.500 | 0.015 | 0.606 | 0.087 | 1.083  | 0.280 |
| 1031563 | COG2011P      | gbs1685 |      | Transport and binding proteins       | Unknown substrate                                                           | 0.581 | 0.000 | 0.982 | 0.621 | 0.959  | 0.521 |
| 1031562 | COG1135P      | gbs1686 |      | Transport and binding proteins       | Unknown substrate                                                           | 0.669 | 0.006 | 1.027 | 0.537 | 1.071  | 0.566 |
| 1031570 | COG0624E      | gbs1687 |      | Metabolism and transport             | Amino acids, peptides, aminosugars and amines                               | 0.606 | 0.006 | 0.775 | 0.120 | 2.603  | 0.020 |
| 1031051 | COG1464P      | gbs1688 |      | Transport and binding proteins       | Unknown substrate                                                           | 0.555 | 0.002 | 0.729 | 0.003 | 1.154  | 0.207 |
| 1030774 | COG0834ET     | gbs1689 |      | Transport and binding proteins       | Unknown substrate                                                           | 0.423 | 0.001 | 0.788 | 0.057 | 1.008  | 0.899 |
| 1031549 | COG2071R      | gbs1690 |      | General function predicted only      | Glutamine amidotransferase, class I                                         | 0.423 | 0.001 | 0.861 | 0.279 | 1.789  | 0.075 |
| 1031325 | -             | gbs1691 |      | Hypothetical                         | Hypothetical cytosolic protein                                              | 0.879 | 0.055 | 1.022 | 0.273 | 0.961  | 0.715 |
| 1031277 | COG2376G      | gbs1692 |      | Metabolism and transport             | Carbohydrates, organic alcohols, and acids                                  | 0.943 | 0.335 | 0.655 | 0.020 | 1.293  | 0.181 |
| 1031198 | COG1309K      | gbs1693 |      | Cellular processes                   | Transcriptional regulator, TetR family                                      | 1.008 | 0.908 | 0.666 | 0.017 | 1.444  | 0.029 |
| 1030356 | COG2376G      | gbs1694 |      | Metabolism and transport             | Carbohydrates, organic alcohols, and acids                                  | 1.063 | 0.451 | 0.509 | 0.002 | 0.929  | 0.527 |
| 1030362 | COG2376G      | gbs1695 |      | Metabolism and transport             | Carbohydrates, organic alcohols, and acids                                  | 0.702 | 0.001 | 0.447 | 0.005 | 1.349  | 0.038 |
| 1030340 | COG3412S      | gbs1696 |      | Metabolism and transport             | Fatty acid and phospholipids                                                | 1.059 | 0.565 | 0.533 | 0.004 | 1.104  | 0.549 |
| 1030843 | -             | gbs1697 |      | Metabolism and transport             | Carbohydrates, organic alcohols, and acids                                  | 0.831 | 0.004 | 0.489 | 0.000 | 1.375  | 0.016 |
| 1029835 | COG0662G      | gbs1698 |      | Hypothetical                         | Hypothetical cytosolic protein                                              | 1.654 | 0.020 | 1.017 | 0.429 | 1.219  | 0.044 |



|         |                    |         |        |                                 |                                                                   |                                                                                      |       |       |       |       |       |       |
|---------|--------------------|---------|--------|---------------------------------|-------------------------------------------------------------------|--------------------------------------------------------------------------------------|-------|-------|-------|-------|-------|-------|
| 1030365 | COG0789K           | gbs1699 |        | Cellular processes              | Transcription                                                     | Transcriptional activator tipA                                                       | 0.894 | 0.331 | 1.379 | 0.022 | 1.029 | 0.856 |
| 1031422 | COG1323R           | gbs1700 |        | Hypothetical                    |                                                                   | Hypothetical cytosolic protein                                                       | 0.651 | 0.005 | 1.165 | 0.178 | 0.958 | 0.725 |
| 1030792 | -                  | gbs1701 |        | Hypothetical                    |                                                                   | Hypothetical protein                                                                 | 0.596 | 0.000 | 1.122 | 0.077 | 1.390 | 0.064 |
| 1031378 | COG0500QR          | gbs1702 |        | Metabolism and transport        | Secondary metabolites                                             | Methyltransferase (EC 2.1.1.-)                                                       | 0.690 | 0.001 | 1.270 | 0.013 | 1.528 | 0.035 |
| 1031376 | -                  | gbs1703 |        | Hypothetical                    |                                                                   | iojap protein family                                                                 | 1.024 | 0.291 | 1.555 | 0.002 | 2.284 | 0.001 |
| 1030344 | COG1335Q           | gbs1704 |        | Metabolism and transport        | Secondary metabolites                                             | Isochorismatase family protein                                                       | 1.063 | 0.123 | 1.655 | 0.000 | 2.416 | 0.001 |
| 1030352 | COG1713H           | gbs1705 |        | Metabolism and transport        | Cofactors, prosthetic groups, and carriers                        | Hydrolase (HAD superfamily)                                                          | 1.036 | 0.378 | 1.586 | 0.000 | 2.596 | 0.001 |
| 1031292 | COG1057H           | gbs1706 | nadD   | Metabolism and transport        | Cofactors, prosthetic groups, and carriers                        | Nicotinate-nucleotide adenyltransferase (EC 2.7.7.18)                                | 0.946 | 0.243 | 1.403 | 0.000 | 3.035 | 0.001 |
| 1030078 | -                  | gbs1707 |        | Hypothetical                    |                                                                   | hypothetical RNA binding protein                                                     | 1.443 | 0.004 | 1.912 | 0.032 | 1.811 | 0.072 |
| 1031389 | COG1161R           | gbs1708 |        | General function predicted only |                                                                   | GTP-binding protein                                                                  | 0.979 | 0.467 | 1.421 | 0.001 | 2.586 | 0.000 |
| 1031668 | COG2179R           | gbs1709 |        | General function predicted only |                                                                   | Putative lipase                                                                      | 0.904 | 0.109 | 1.359 | 0.003 | 2.507 | 0.006 |
| 1031355 | COG0697GER         | gbs1710 |        | Transport and binding proteins  | Unknown substrate                                                 | Transporter, drug metabolite exporter family                                         | 0.780 | 0.409 | 0.569 | 0.015 | 1.528 | 0.298 |
| 1030455 | COG0064J           | gbs1711 | gatB   | Cellular processes              | Translation, ribosomal structure and biogenesis                   | Aspartyl glutamyl-tRNA(Asn Gln) amidotransferase subunit B (EC 6.3.5.-)              | 0.904 | 0.021 | 0.918 | 0.100 | 3.844 | 0.000 |
| 1030183 | -                  | gbs1712 | gata   | Cellular processes              | Translation, ribosomal structure and biogenesis                   | Aspartyl glutamyl-tRNA(Asn Gln) amidotransferase subunit A (EC 6.3.5.-)              | 1.007 | 0.851 | 0.952 | 0.266 | 4.056 | 0.000 |
| 1029862 | COG0721J           | gbs1713 | gatC   | Cellular processes              | Translation, ribosomal structure and biogenesis                   | Aspartyl glutamyl-tRNA(Asn Gln) amidotransferase subunit C (EC 6.3.5.-)              | 0.972 | 0.530 | 0.979 | 0.511 | 2.517 | 0.000 |
| 1030268 | COG0574G           | gbs1714 |        | Metabolism and transport        | Carbohydrates, organic alcohols, and acids                        | Pyruvate phosphate dikinase (EC 2.7.9.1)                                             | 0.887 | 0.242 | 0.763 | 0.032 | 1.176 | 0.246 |
| 1031461 | -                  | gbs1715 |        | General function predicted only |                                                                   | ATP GTP-binding protein                                                              | 0.862 | 0.035 | 0.623 | 0.071 | 1.159 | 0.395 |
| 1031400 | COG0517R           | gbs1716 |        | General function predicted only |                                                                   | CBS domain containing protein                                                        | 0.871 | 0.079 | 0.737 | 0.007 | 1.146 | 0.350 |
| 1030863 | COG1250I           | gbs1717 |        | Metabolism and transport        | Fatty acid and phospholipids                                      | 3-hydroxybutyryl-CoA dehydrogenase (EC 1.1.1.157)                                    | 3.481 | 0.000 | 1.305 | 0.032 | 3.778 | 0.000 |
| 1030063 | COG1335Q           | gbs1718 |        | Metabolism and transport        | Secondary metabolites                                             | Pyrazinamidase (EC 3.5.1.-) Nicotinamidase (EC 3.5.1.19)                             | 1.990 | 0.000 | 1.235 | 0.006 | 1.272 | 0.198 |
| 1031455 | -                  | gbs1719 | codY   | Cellular processes              | Transcription                                                     | Transcription pleiotropic repressor codY                                             | 1.260 | 0.026 | 1.184 | 0.012 | 1.023 | 0.863 |
| 1030746 | COG0436E           | gbs1720 |        | Metabolism and transport        | Amino acids, peptides, aminosugars and amines                     | Aspartate aminotransferase (EC 2.6.1.1)                                              | 1.472 | 0.000 | 1.409 | 0.001 | 1.000 | 0.999 |
| 1030629 | COG0589T           | gbs1721 |        | Cellular processes              | Posttranslational modification, protein turnover, chaperones      | Universal stress protein family                                                      | 2.622 | 0.004 | 0.179 | 0.137 | 0.573 | 0.004 |
| 1031541 | COG0561R, COG0561R | gbs1722 |        | Metabolism and transport        | Central intermediary metabolism                                   | Hydrolase (HAD superfamily)                                                          | 0.945 | 0.450 | 0.799 | 0.001 | 1.019 | 0.924 |
| 1030529 | -                  | gbs1723 | asnB   | Metabolism and transport        | Amino acids, peptides, aminosugars and amines                     | L-asparaginase (EC 3.5.1.1)                                                          | 0.572 | 0.040 | 0.917 | 0.562 | 0.987 | 0.770 |
| 1030023 | COG0169E           | gbs1724 | aroE   | Metabolism and transport        | Amino acids, peptides, aminosugars and amines                     | Shikimate 5-dehydrogenase (EC 1.1.1.25)                                              | 1.067 | 0.078 | 0.748 | 0.026 | 3.313 | 0.006 |
| 1030846 | COG4989R           | gbs1725 |        | Metabolism and transport        | Central intermediary metabolism                                   | Oxidoreductase (EC 1.1.1.-)                                                          | 1.582 | 0.000 | 0.892 | 0.357 | 2.494 | 0.001 |
| 1030858 | COG1200LK          | gbs1726 | recG   | Cellular processes              | DNA replication, recombination and repair                         | ATP-dependent DNA helicase recG (EC 3.6.1.-)                                         | 1.192 | 0.049 | 1.196 | 0.103 | 1.207 | 0.028 |
| 1030170 | COG3942R           | gbs1727 | isp2   | General function predicted only |                                                                   | Immunogenic secreted protein                                                         | 1.120 | 0.001 | 1.137 | 0.012 | 1.278 | 0.115 |
| 1029940 | COG0787M           | gbs1728 | alr    | Cell Envelope                   | Biosynthesis and degradation of murein sacculus and peptidoglycan | Alanine racemase (EC 5.1.1.1)                                                        | 0.937 | 0.206 | 0.831 | 0.034 | 0.864 | 0.445 |
| 1030345 | COG0736I           | gbs1729 | acpS   | Metabolism and transport        | Fatty acid and phospholipids                                      | Holo-[acyl-carrier protein] synthase (EC 2.7.8.7)                                    | 1.016 | 0.787 | 0.859 | 0.028 | 0.983 | 0.892 |
| 1031536 | COG0722E           | gbs1730 |        | Metabolism and transport        | Amino acids, peptides, aminosugars and amines                     | 3-deoxy-7-phosphoheptulonate synthase (EC 2.5.1.54)                                  | 0.927 | 0.191 | 0.832 | 0.042 | 1.316 | 0.015 |
| 1030346 | COG0653U           | gbs1731 | secA   | Cellular processes              | Posttranslational modification, protein turnover, chaperones      | Protein translocase subunit secA                                                     | 0.902 | 0.060 | 0.965 | 0.463 | 1.981 | 0.003 |
| 1030410 | COG1482G           | gbs1732 | pni    | Metabolism and transport        | Carbohydrates, organic alcohols, and acids                        | Mannose-6-phosphate isomerase (EC 5.3.1.8)                                           | 1.353 | 0.006 | 1.274 | 0.033 | 1.274 | 0.073 |
| 1030394 | COG1940KG          | gbs1733 | scrK   | Metabolism and transport        | Carbohydrates, organic alcohols, and acids                        | Fructokinase (EC 2.7.1.4)                                                            | 0.708 | 0.044 | 1.360 | 0.067 | 0.563 | 0.002 |
| 1030249 | COG1263G           | gbs1734 | scrA   | Metabolism and transport        | Carbohydrates, organic alcohols, and acids                        | PTS system, sucrose-specific IIBC component (EC 2.7.1.69)                            | 0.978 | 0.537 | 1.431 | 0.064 | 0.147 | 0.002 |
| 1030678 | -                  | gbs1735 | scrB   | Metabolism and transport        | Carbohydrates, organic alcohols, and acids                        | Sucrose-6-phosphate hydrolase (EC 3.2.1.26)                                          | 0.918 | 0.285 | 1.150 | 0.360 | 0.333 | 0.001 |
| 1030460 | COG1609K           | gbs1736 | scrR   | Cellular processes              | Transcription                                                     | Sucrose operon repressor                                                             | 0.756 | 0.008 | 0.976 | 0.800 | 0.338 | 0.008 |
| 1030497 | COG0781K           | gbs1737 | nusB   | Cellular processes              | Transcription                                                     | N utilization substance protein B                                                    | 0.994 | 0.845 | 1.046 | 0.355 | 1.185 | 0.207 |
| 1030404 | -                  | gbs1738 |        | Cellular processes              | Posttranslational modification, protein turnover, chaperones      | General stress protein, Gls24 family                                                 | 1.235 | 0.062 | 1.086 | 0.419 | 1.013 | 0.961 |
| 1030682 | COG0231J           | gbs1739 | efp    | Cellular processes              | Translation, ribosomal structure and biogenesis                   | Protein Translation Elongation Factor P (EF-P)                                       | 0.876 | 0.013 | 0.956 | 0.042 | 1.366 | 0.008 |
| 1030540 | COG1132V           | gbs1740 | alr    | Transport and binding proteins  | Unknown substrate                                                 | ABC transporter ATP-binding and permease protein                                     | 0.724 | 0.000 | 1.205 | 0.115 | 0.758 | 0.003 |
| 1030681 | COG1132V           | gbs1741 |        | Transport and binding proteins  | Unknown substrate                                                 | ABC transporter, ATP-binding/permease protein                                        | 0.751 | 0.029 | 1.077 | 0.078 | 0.630 | 0.001 |
| 1030676 | COG1122P           | gbs1742 |        | Metabolism and transport        | Inorganic ion transport and metabolism                            | Cobalt transport ATP-binding protein cbiO                                            | 0.846 | 0.152 | 1.227 | 0.081 | 0.588 | 0.050 |
| 1030686 | COG0619P           | gbs1743 |        | Metabolism and transport        | Inorganic ion transport and metabolism                            | Cobalt permease and related transporters                                             | 0.821 | 0.034 | 1.187 | 0.181 | 0.670 | 0.001 |
| 1030679 | -                  | gbs1744 |        | Hypothetical                    |                                                                   | membrane-bound protein                                                               | 0.919 | 0.505 | 1.165 | 0.023 | 0.701 | 0.048 |
| 1030680 | -                  | gbs1745 |        | Hypothetical                    |                                                                   | Hypothetical protein                                                                 | 0.879 | 0.048 | 1.112 | 0.450 | 0.695 | 0.009 |
| 1030677 | -                  | gbs1746 |        | Hypothetical                    |                                                                   | Hypothetical protein                                                                 | 0.848 | 0.137 | 1.070 | 0.595 | 0.906 | 0.077 |
| 1030684 | COG1021Q           | gbs1748 |        | Metabolism and transport        | Secondary metabolites                                             | 2,3-dihydroxybenzoate-AMP ligase (EC 2.7.7.58)                                       | 0.870 | 0.370 | 1.228 | 0.451 | 1.285 | 0.013 |
| 1030683 | COG1321K           | gbs1749 |        | Cellular processes              | Transcription                                                     | Iron-dependent repressor                                                             | 0.912 | 0.442 | 0.596 | 0.024 | 2.515 | 0.020 |
| 1030685 | COG2131F           | gbs1750 | comEB  | Metabolism and transport        | Purines, pyrimidines, nucleosides, and nucleotides                | ComE operon protein 2                                                                | 0.911 | 0.158 | 0.584 | 0.002 | 2.936 | 0.000 |
| 1030715 | COG0006E           | gbs1751 |        | Metabolism and transport        | Amino acids, peptides, aminosugars and amines                     | Xaa-Pro dipeptidase (EC 3.4.13.9)                                                    | 1.206 | 0.027 | 0.592 | 0.015 | 2.413 | 0.004 |
| 1030708 | -                  | gbs1752 |        | Hypothetical                    |                                                                   | Hypothetical protein                                                                 | 1.882 | 0.012 | 0.405 | 0.000 | 2.389 | 0.054 |
| 1030687 | -                  | gbs1753 |        | Cellular processes              | Toxin production and resistance                                   | Multidrug resistance protein B                                                       | 2.254 | 0.009 | 0.461 | 0.018 | 1.732 | 0.111 |
| 1030705 | COG0178L           | gbs1754 | uvrA   | Cellular processes              | DNA replication, recombination and repair                         | Excinuclease ABC subunit A                                                           | 1.446 | 0.000 | 1.036 | 0.680 | 2.330 | 0.002 |
| 1030719 | -                  | gbs1755 |        | Hypothetical                    |                                                                   | Hypothetical membrane spanning protein                                               | 1.174 | 0.002 | 1.711 | 0.000 | 1.214 | 0.024 |
| 1030723 | COG0598P           | gbs1756 | corA   | Metabolism and transport        | Inorganic ion transport and metabolism                            | Magnesium and cobalt transport protein corA                                          | 1.192 | 0.015 | 1.635 | 0.000 | 0.959 | 0.712 |
| 1030704 | -                  | gbs1757 | rpsR   | Cellular processes              | Translation, ribosomal structure and biogenesis                   | SSU ribosomal protein S18P                                                           | 0.791 | 0.007 | 1.323 | 0.001 | 0.767 | 0.215 |
| 1030713 | COG0629L           | gbs1758 | ssb3   | Cellular processes              | DNA replication, recombination and repair                         | Single strand binding protein                                                        | 0.843 | 0.000 | 1.279 | 0.000 | 0.873 | 0.405 |
| 1030730 | COG0360J           | gbs1759 | rpsF   | Cellular processes              | Translation, ribosomal structure and biogenesis                   | SSU ribosomal protein S6P                                                            | 0.769 | 0.005 | 1.177 | 0.003 | 0.911 | 0.526 |
| 1030720 | COG1194L           | gbs1760 | mutY   | Cellular processes              | DNA replication, recombination and repair                         | A G-specific adenine DNA glycosylase (EC 3.2.2.-)                                    | 0.841 | 0.050 | 1.076 | 0.416 | 1.101 | 0.045 |
| 1030726 | COG1396K           | gbs1761 |        | Cellular processes              | Transcription                                                     | Transcriptional regulator                                                            | 0.734 | 0.052 | 0.724 | 0.056 | 0.646 | 0.027 |
| 1030744 | COG0526OC          | gbs1762 | trx    | Metabolism and transport        | Energy production and conversion                                  | Thioredoxin                                                                          | 1.511 | 0.006 | 1.561 | 0.000 | 2.225 | 0.008 |
| 1031017 | -                  | gbs1763 |        | Metabolism and transport        | Fatty acid and phospholipids                                      | Phosphatidylglycerophosphatase B (EC 3.1.3.27)                                       | 0.951 | 0.495 | 1.142 | 0.190 | 2.560 | 0.001 |
| 1030736 | COG1193L           | gbs1764 | mutS2  | Cellular processes              | DNA replication, recombination and repair                         | DNA mismatch repair protein mutS                                                     | 0.959 | 0.287 | 1.092 | 0.323 | 1.290 | 0.059 |
| 1031828 | -                  | gbs1765 |        | General function predicted only |                                                                   | CypA family membrane protein                                                         | 1.657 | 0.000 | 0.977 | 0.601 | 1.018 | 0.841 |
| 1030758 | -                  | gbs1766 |        | Hypothetical                    |                                                                   | Hypothetical cytosolic protein                                                       | 1.433 | 0.001 | 0.978 | 0.660 | 1.271 | 0.067 |
| 1031367 | COG1039L           | gbs1767 |        | Cellular processes              | Transcription                                                     | Ribonuclease HIII (EC 3.1.26.4)                                                      | 0.944 | 0.269 | 1.017 | 0.781 | 3.019 | 0.003 |
| 1030794 | COG0681U           | gbs1768 | spi    | Cellular processes              | Posttranslational modification, protein turnover, chaperones      | Signal peptidase I (EC 3.4.21.89)                                                    | 1.205 | 0.029 | 1.156 | 0.009 | 2.583 | 0.000 |
| 1030802 | COG0507L           | gbs1769 | recD   | Cellular processes              | DNA replication, recombination and repair                         | Exodeoxyribonuclease V alpha chain (EC 3.1.11.5)                                     | 1.411 | 0.031 | 2.152 | 0.000 | 2.561 | 0.043 |
| 1030764 | -                  | gbs1770 |        | Hypothetical                    |                                                                   | Hypothetical protein                                                                 | 0.781 | 0.004 | 0.941 | 0.125 | 0.510 | 0.030 |
| 1031309 | COG0389L           | gbs1771 | dinP   | Cellular processes              | DNA replication, recombination and repair                         | DNA polymerase IV (EC 2.7.7.7)                                                       | 1.044 | 0.497 | 0.912 | 0.134 | 0.855 | 0.190 |
| 1030768 | COG1882C           | gbs1772 | pfl    | Metabolism and transport        | Energy production and conversion                                  | Formate acetyltransferase (EC 2.3.1.54)                                              | 1.781 | 0.071 | 1.168 | 0.026 | 0.640 | 0.027 |
| 1030831 | -                  | gbs1773 |        | General function predicted only |                                                                   | FMN-binding protein                                                                  | 0.606 | 0.012 | 1.438 | 0.004 | 1.234 | 0.093 |
| 1030769 | COG1680V           | gbs1774 |        | Cellular processes              | Toxin production and resistance                                   | Beta-lactamase family protein                                                        | 0.913 | 0.219 | 0.951 | 0.274 | 0.820 | 0.134 |
| 1030770 | -                  | gbs1775 |        | Hypothetical                    |                                                                   | Hypothetical cytosolic protein                                                       | 1.031 | 0.268 | 1.040 | 0.380 | 1.034 | 0.667 |
| 1030773 | -                  | gbs1776 |        | Hypothetical                    |                                                                   | Hypothetical membrane spanning protein                                               | 0.637 | 0.002 | 0.730 | 0.003 | 1.017 | 0.908 |
| 1030776 | -                  | gbs1777 | glpF.2 | Metabolism and transport        | Carbohydrates, organic alcohols, and acids                        | Aquaporin Glycerol uptake facilitator protein                                        | 0.755 | 0.008 | 1.189 | 0.038 | 2.950 | 0.004 |
| 1030777 | COG0589T           | gbs1778 |        | Cellular processes              | Posttranslational modification, protein turnover, chaperones      | Universal stress protein family                                                      | 1.030 | 0.721 | 0.880 | 0.097 | 5.052 | 0.000 |
| 1031468 | -                  | gbs1779 | norA   | Transport and binding proteins  | Unknown substrate                                                 | Transporter, MFS superfamily                                                         | 0.819 | 0.001 | 0.889 | 0.158 | 7.228 | 0.000 |
| 1030778 | COG0664T           | gbs1780 | srv    | Cellular processes              | Transcription                                                     | Transcription regulator, crp family                                                  | 1.064 | 0.043 | 1.019 | 0.703 | 0.299 | 0.001 |
| 1030789 | COG2936R           | gbs1781 | pepXP  | Metabolism and transport        | Amino acids, peptides, aminosugars and amines                     | Xaa-Pro dipeptidyl-peptidase (EC 3.4.14.11)                                          | 0.875 | 0.086 | 0.854 | 0.046 | 0.269 | 0.002 |
| 1031410 | -                  | gbs1782 |        | Hypothetical                    |                                                                   | Hypothetical protein                                                                 | 0.766 | 0.008 | 0.914 | 0.185 | 0.316 | 0.002 |
| 1030790 | COG0142H           | gbs1783 |        | Metabolism and transport        | Cofactors, prosthetic groups, and carriers                        | Farnesyl pyrophosphate synthetase (EC 2.5.1.1) Geranyltransferase (EC 2.5.1.10) Farn | 1.075 | 0.353 | 0.915 | 0.082 | 0.449 | 0.021 |
| 1030803 | COG4987CO          | gbs1784 |        | Metabolism and transport        | Energy production and conversion                                  | Transport ATP-binding protein cydC                                                   | 0.894 | 0.474 | 0.650 | 0.043 | 0.271 | 0.018 |
| 1030795 | COG4988CO          | gbs1785 |        | Metabolism and transport        | Energy production and conversion                                  | Transport ATP-binding protein cydD                                                   | 0.814 | 0.093 | 0.608 | 0.012 | 0.387 | 0.021 |
| 1030801 | COG1294C           | gbs1786 |        | Metabolism and transport        | Energy production and conversion                                  | Cytochrome d ubiquinol oxidase subunit II (EC 1.10.3.-)                              | 1.033 | 0.390 | 0.873 | 0.015 | 0.662 | 0.001 |
| 1030701 | COG1271C           | gbs1787 |        | Metabolism and transport        | Energy production and conversion                                  | Cytochrome d ubiquinol oxidase subunit I (EC 1.10.3.-)                               | 0.995 | 0.945 | 0.827 | 0.035 | 0.896 | 0.319 |
| 1030807 | COG1252C           | gbs1788 |        | Metabolism and transport        | Energy production and conversion                                  | NADH dehydrogenase family                                                            | 1.330 | 0.018 | 0.792 | 0.043 | 0     |       |

|         |               |         |        |                                 |                                                                                 |                                                                                         |       |       |       |       |        |       |
|---------|---------------|---------|--------|---------------------------------|---------------------------------------------------------------------------------|-----------------------------------------------------------------------------------------|-------|-------|-------|-------|--------|-------|
| 1030850 | COG2230M      | gbs1792 |        | Cell Envelope                   | Biosynthesis and degradation of surface polysaccharides and lipopolysaccharides | Cyclopropane-fatty-acyl-phospholipid synthase (EC 2.1.1.79)                             | 0.975 | 0.632 | 0.620 | 0.008 | 0.474  | 0.040 |
| 1030851 | COG0789K      | gbs1793 |        | Cellular processes              | Transcription                                                                   | Transcriptional regulator, MerR family                                                  | 0.463 | 0.000 | 0.597 | 0.001 | 0.532  | 0.004 |
| 1030859 | COG0847L      | gbs1794 | dnaQ   | Cellular processes              | DNA replication, recombination and repair                                       | DNA polymerase III, epsilon chain (EC 2.7.7.7)                                          | 0.436 | 0.001 | 0.682 | 0.019 | 0.528  | 0.011 |
| 1030852 | -             | gbs1795 |        | Hypothetical                    |                                                                                 | Hypothetical cytosolic protein                                                          | 0.762 | 0.005 | 0.901 | 0.069 | 0.562  | 0.004 |
| 1030856 | COG2081R      | gbs1796 |        | General function predicted only |                                                                                 | NAD(FAD)-utilizing dehydrogenases                                                       | 1.522 | 0.019 | 1.177 | 0.009 | 0.887  | 0.158 |
| 1030860 | COG1085C      | gbs1797 |        | Metabolism and transport        | Energy production and conversion                                                | Galactose-1-phosphate uridylyltransferase (EC 2.7.7.10)                                 | 0.783 | 0.032 | 0.849 | 0.042 | 0.811  | 0.018 |
| 1030855 | COG0199J      | gbs1798 | rpsN2  | Cellular processes              | Translation, ribosomal structure and biogenesis                                 | SSU ribosomal protein S14P                                                              | 0.856 | 0.001 | 1.648 | 0.000 | 11.822 | 0.007 |
| 1030854 | COG2008E      | gbs1799 |        | Metabolism and transport        | Amino acids, peptides, aminosugars and amines                                   | Low-specificity L-threonine aldolase (EC 4.1.2.5)                                       | 0.715 | 0.024 | 0.788 | 0.032 | 0.483  | 0.015 |
| 1030853 | COG0533O      | gbs1800 |        | Cellular processes              | Posttranslational modification, protein turnover, chaperones                    | O-sialoglycoprotein endopeptidase (EC 3.4.24.57)                                        | 1.051 | 0.314 | 1.105 | 0.085 | 1.110  | 0.312 |
| 1030862 | COG0456R      | gbs1801 |        | Cellular processes              | Translation, ribosomal structure and biogenesis                                 | Ribosomal-protein-S18-alanine acetyltransferase (EC 2.3.1.128)                          | 1.133 | 0.069 | 1.058 | 0.332 | 0.966  | 0.731 |
| 1030865 | COG1214O      | gbs1802 |        | Cellular processes              | Posttranslational modification, protein turnover, chaperones                    | Non-proteolytic protein, peptidase family M22                                           | 1.203 | 0.000 | 1.036 | 0.303 | 0.897  | 0.118 |
| 1030868 | -             | gbs1803 |        | General function predicted only |                                                                                 | Putative transcriptional regulator                                                      | 1.065 | 0.073 | 0.957 | 0.095 | 2.234  | 0.017 |
| 1030867 | COG0595R      | gbs1804 |        | General function predicted only |                                                                                 | Zn-dependent hydrolase (EC 3.-.-.-)                                                     | 1.144 | 0.023 | 0.963 | 0.598 | 2.076  | 0.018 |
| 1030861 | COG3942R      | gbs1805 |        | General function predicted only |                                                                                 | Secreted protein                                                                        | 1.240 | 0.154 | 1.547 | 0.072 | 0.855  | 0.501 |
| 1030872 | -             | gbs1806 | glnA   | Metabolism and transport        | Amino acids, peptides, aminosugars and amines                                   | Glutamine synthetase (EC 6.3.1.2)                                                       | 0.955 | 0.470 | 1.102 | 0.032 | 0.905  | 0.279 |
| 1030864 | COG0789K      | gbs1807 |        | Cellular processes              | Transcription                                                                   | Transcriptional regulator, MerR family                                                  | 0.966 | 0.152 | 1.047 | 0.264 | 1.069  | 0.521 |
| 1030866 | COG4129S      | gbs1808 |        | Hypothetical                    |                                                                                 | Hypothetical protein                                                                    | 1.152 | 0.053 | 1.433 | 0.007 | 0.864  | 0.221 |
| 1030870 | -             | gbs1809 | pgk    | Metabolism and transport        | Carbohydrates, organic alcohols, and acids                                      | Phosphoglycerate kinase (EC 2.7.2.3)                                                    | 0.923 | 0.333 | 1.009 | 0.822 | 0.639  | 0.071 |
| 1030873 | COG2503R      | gbs1810 | lppC   | Metabolism and transport        | Cofactors, prosthetic groups, and carriers                                      | Acid phosphatase (EC 3.1.3.2)                                                           | 1.904 | 0.002 | 0.648 | 0.004 | 0.625  | 0.001 |
| 1030869 | COG0057G      | gbs1811 | gapC   | Metabolism and transport        | Carbohydrates, organic alcohols, and acids                                      | Glyceraldehyde 3-phosphate dehydrogenase (EC 1.2.1.12) GAPDH                            | 0.807 | 0.051 | 0.987 | 0.794 | 0.626  | 0.063 |
| 1030871 | COG0480J      | gbs1812 | fus    | Cellular processes              | Translation, ribosomal structure and biogenesis                                 | Protein Translation Elongation Factor G (EF-G)                                          | 0.920 | 0.012 | 1.141 | 0.028 | 0.997  | 0.967 |
| 1030883 | COG0049J      | gbs1813 | rpsG   | Cellular processes              | Translation, ribosomal structure and biogenesis                                 | SSU ribosomal protein S7P                                                               | 0.890 | 0.014 | 1.316 | 0.012 | 1.547  | 0.132 |
| 1030884 | -             | gbs1814 | rpsL   | Cellular processes              | Translation, ribosomal structure and biogenesis                                 | SSU ribosomal protein S12P                                                              | 0.891 | 0.024 | 1.236 | 0.002 | 1.930  | 0.001 |
| 1030890 | COG0503F      | gbs1815 | purR   | Metabolism and transport        | Purines, pyrimidines, nucleosides, and nucleotides                              | Pur operon repressor                                                                    | 1.107 | 0.071 | 0.895 | 0.022 | 1.424  | 0.082 |
| 1030876 | COG3481R      | gbs1816 | cbf    | General function predicted only |                                                                                 | CMP-binding factor                                                                      | 1.118 | 0.004 | 1.019 | 0.747 | 5.122  | 0.000 |
| 1030896 | COG1322S      | gbs1817 |        | General function predicted only |                                                                                 | RmC family protein                                                                      | 1.007 | 0.775 | 0.988 | 0.795 | 4.262  | 0.001 |
| 1030891 | COG1564H      | gbs1818 |        | Metabolism and transport        | Cofactors, prosthetic groups, and carriers                                      | Thiamin pyrophosphokinase (EC 2.7.6.2)                                                  | 1.294 | 0.106 | 0.917 | 0.283 | 4.103  | 0.000 |
| 1030894 | COG0036G      | gbs1819 | rpe    | Metabolism and transport        | Carbohydrates, organic alcohols, and acids                                      | Ribulose-phosphate 3-epimerase (EC 5.1.3.1)                                             | 1.188 | 0.025 | 1.124 | 0.034 | 3.033  | 0.004 |
| 1030900 | COG1162R      | gbs1820 |        | General function predicted only |                                                                                 | GTPase (EC 3.6.1.-)                                                                     | 1.102 | 0.051 | 1.076 | 0.403 | 2.997  | 0.001 |
| 1030895 | -             | gbs1821 |        | Cellular processes              | Translation, ribosomal structure and biogenesis                                 | 23S rRNA m(G) G45 methyltransferase (EC 2.1.1.51)                                       | 0.818 | 0.017 | 1.288 | 0.002 | 3.318  | 0.005 |
| 1030893 | COG0030J      | gbs1822 | ksgA   | Cellular processes              | Translation, ribosomal structure and biogenesis                                 | Dimethyladenosine transferase (EC 2.1.1.-)                                              | 0.847 | 0.006 | 1.155 | 0.004 | 3.738  | 0.005 |
| 1030892 | COG0537FGR    | gbs1823 |        | General function predicted only |                                                                                 | HIT family hydrolase                                                                    | 1.014 | 0.719 | 1.191 | 0.023 | 1.911  | 0.003 |
| 1030897 | COG1658L      | gbs1824 |        | Cellular processes              | Transcription                                                                   | Ribonuclease M5 (EC 3.1.26.8)                                                           | 0.824 | 0.002 | 1.106 | 0.141 | 2.143  | 0.002 |
| 1030898 | COG0084L      | gbs1825 | tatD   | Cellular processes              | DNA replication, recombination and repair                                       | DNase, TatD family (EC 3.1.-.-)                                                         | 0.942 | 0.435 | 1.083 | 0.288 | 1.480  | 0.010 |
| 1030899 | -             | gbs1826 |        | Hypothetical                    |                                                                                 | Hypothetical protein                                                                    | 1.363 | 0.007 | 0.920 | 0.295 | 1.172  | 0.536 |
| 1030909 | -             | gbs1827 |        | Hypothetical                    |                                                                                 | Hypothetical protein                                                                    | 1.672 | 0.002 | 0.940 | 0.490 | 1.046  | 0.882 |
| 1030903 | -             | gbs1828 |        | Hypothetical                    |                                                                                 | Hypothetical cytosolic protein                                                          | 1.758 | 0.003 | 0.993 | 0.877 | 0.946  | 0.690 |
| 1030902 | -             | gbs1829 |        | Hypothetical                    |                                                                                 | Hypothetical secreted protein                                                           | 1.769 | 0.000 | 0.995 | 0.948 | 0.763  | 0.208 |
| 1030904 | COG3966M      | gbs1830 | dltD   | General function predicted only |                                                                                 | Protein dltD precursor                                                                  | 0.876 | 0.001 | 0.972 | 0.159 | 1.760  | 0.001 |
| 1030910 | COG0236IQ     | gbs1831 |        | Metabolism and transport        | Fatty acid and phospholipids                                                    | D-alanyl carrier protein                                                                | 0.895 | 0.003 | 1.029 | 0.630 | 1.838  | 0.002 |
| 1030913 | COG1696M      | gbs1832 |        | General function predicted only |                                                                                 | Protein dltB                                                                            | 0.863 | 0.002 | 0.968 | 0.420 | 1.418  | 0.001 |
| 1030911 | COG1020Q      | gbs1833 | dltA   | Metabolism and transport        | Secondary metabolites                                                           | D-alanine-activating enzyme (EC 6.3.2.-)                                                | 0.887 | 0.006 | 0.912 | 0.062 | 1.225  | 0.059 |
| 1030917 | COG0642T      | gbs1834 |        | Cellular processes              | Signal transduction                                                             | Sensory transduction protein kinase (EC 2.7.3.-)                                        | 0.825 | 0.021 | 0.908 | 0.003 | 1.414  | 0.023 |
| 1030914 | COG0745TK     | gbs1835 |        | Cellular processes              | Transcription                                                                   | Transcriptional regulatory protein                                                      | 0.848 | 0.039 | 0.898 | 0.037 | 0.956  | 0.810 |
| 1030915 | -             | gbs1836 | rpmH   | Cellular processes              | Translation, ribosomal structure and biogenesis                                 | LSU ribosomal protein L34P                                                              | 0.992 | 0.888 | 1.364 | 0.010 | 1.345  | 0.061 |
| 1030912 | COG3314S      | gbs1837 |        | Hypothetical                    |                                                                                 | Hypothetical protein                                                                    | 0.603 | 0.000 | 1.031 | 0.520 | 1.929  | 0.004 |
| 1030922 | COG2113E, COG | gbs1838 | opuABC | Metabolism and transport        | Amino acids, peptides, aminosugars and amines                                   | Glycine betaine-binding protein Glycine betaine transport system permease protein       | 1.564 | 0.000 | 0.577 | 0.019 | 2.030  | 0.000 |
| 1030926 | COG4175E      | gbs1839 | opuAA  | Metabolism and transport        | Amino acids, peptides, aminosugars and amines                                   | Glycine betaine transport ATP-binding protein                                           | 2.389 | 0.013 | 0.559 | 0.002 | 1.376  | 0.012 |
| 1030923 | COG3957G      | gbs1840 |        | Metabolism and transport        | Carbohydrates, organic alcohols, and acids                                      | Xylulose-5-phosphate (EC 4.1.2.9) Fructose-6-phosphate phosphoketolase (EC 4.1.2.22)    | 0.830 | 0.210 | 0.548 | 0.079 | 1.742  | 0.005 |
| 1030916 | COG2220R      | gbs1841 |        | Cellular processes              | Toxin production and resistance                                                 | Metal-dependent hydrolase (EC 3.-.-.-)                                                  | 0.375 | 0.001 | 0.300 | 0.000 | 2.367  | 0.000 |
| 1030928 | COG3711K      | gbs1842 |        | Cellular processes              | Transcription                                                                   | Transcription antiterminaltor, BglG family                                              | 0.579 | 0.003 | 0.560 | 0.000 | 1.085  | 0.599 |
| 1030929 | -             | gbs1843 |        | General function predicted only |                                                                                 | protein with aldose 1-epimerase motif involved in 2-ketogluconate utilization           | 0.323 | 0.105 | 0.721 | 0.366 | 1.007  | 0.993 |
| 1030924 | COG1070G      | gbs1844 |        | Metabolism and transport        | Carbohydrates, organic alcohols, and acids                                      | L-xylulokinase (EC 2.7.1.53)                                                            | 0.629 | 0.455 | 1.111 | 0.704 | 1.847  | 0.398 |
| 1030919 | COG2159R      | gbs1845 |        | Metabolism and transport        | Purines, pyrimidines, nucleosides, and nucleotides                              | Amidohydrolase                                                                          | 0.662 | 0.009 | 0.416 | 0.019 | 0.978  | 0.880 |
| 1030921 | COG3775G      | gbs1846 |        | Metabolism and transport        | Carbohydrates, organic alcohols, and acids                                      | PTS system, galactitol-specific IIC component (EC 2.7.1.69)                             | 0.395 | 0.072 | 0.609 | 0.129 | 1.388  | 0.097 |
| 1030932 | COG1052CHR    | gbs1847 |        | Metabolism and transport        | Central intermediary metabolism                                                 | Glyoxylate reductase (NADP+) (EC 1.1.1.79) Glyoxylate reductase (NAD+) (EC 1.1.1.26) Hy | 1.111 | 0.293 | 1.063 | 0.530 | 1.176  | 0.590 |
| 1030931 | -             | gbs1848 |        | Hypothetical                    |                                                                                 | Hypothetical protein                                                                    | 2.009 | 0.002 | 2.009 | 0.026 | 1.154  | 0.351 |
| 1030925 | COG1609K      | gbs1849 |        | Cellular processes              | Transcription                                                                   | Kdg operon repressor                                                                    | 0.858 | 0.058 | 0.528 | 0.000 | 1.567  | 0.089 |
| 1030936 | -             | gbs1850 |        | Metabolism and transport        | Energy production and conversion                                                | Transaldolase (EC 2.2.1.2)                                                              | 0.859 | 0.279 | 0.805 | 0.252 | 3.082  | 0.001 |
| 1030939 | COG0235G      | gbs1851 | araD   | Metabolism and transport        | Carbohydrates, organic alcohols, and acids                                      | L-ribulose-5-phosphate 4-epimerase (EC 5.1.3.4)                                         | 1.048 | 0.559 | 0.775 | 0.193 | 1.918  | 0.006 |
| 1030935 | COG3623G      | gbs1852 |        | Metabolism and transport        | Carbohydrates, organic alcohols, and acids                                      | L-xylulose 5-phosphate 3-epimerase (EC 5.3.1.-)                                         | 0.784 | 0.064 | 0.823 | 0.337 | 1.776  | 0.016 |
| 1030930 | COG0269G      | gbs1853 |        | Metabolism and transport        | Carbohydrates, organic alcohols, and acids                                      | 3-keto-L-gulonate-6-phosphate decarboxylase (EC 4.1.1.-)                                | 0.668 | 0.005 | 0.658 | 0.033 | 1.752  | 0.007 |
| 1030937 | COG1762GT     | gbs1854 |        | Metabolism and transport        | Carbohydrates, organic alcohols, and acids                                      | PTS system, 3-keto-L-gulonate specific IIA component (EC 2.7.1.69)                      | 0.852 | 0.495 | 0.670 | 0.052 | 1.803  | 0.006 |
| 1030933 | COG3414G      | gbs1855 |        | Metabolism and transport        | Carbohydrates, organic alcohols, and acids                                      | PTS system, 3-keto-L-gulonate specific IIB component (EC 2.7.1.69)                      | 1.395 | 0.050 | 1.257 | 0.305 | 2.252  | 0.007 |
| 1030941 | -             | gbs1856 | ulaA   | Metabolism and transport        | Carbohydrates, organic alcohols, and acids                                      | PTS system, 3-keto-L-gulonate specific IIC component (EC 2.7.1.69)                      | 0.919 | 0.466 | 0.750 | 0.343 | 1.762  | 0.001 |
| 1030938 | -             | gbs1857 |        | Hypothetical                    |                                                                                 | Hypothetical membrane associated protein                                                | 0.920 | 0.402 | 0.907 | 0.412 | 0.353  | 0.022 |
| 1030943 | -             | gbs1858 |        | Hypothetical                    |                                                                                 | Hypothetical protein                                                                    | 2.399 | 0.001 | 1.628 | 0.022 | 0.412  | 0.018 |
| 1030945 | -             | gbs1859 | purA   | Metabolism and transport        | Purines, pyrimidines, nucleosides, and nucleotides                              | Adenylosuccinate synthetase (EC 6.3.4.4)                                                | 1.156 | 0.073 | 0.780 | 0.009 | 0.567  | 0.096 |
| 1030942 | COG1299G      | gbs1860 | slor   | Cellular processes              | Transcription                                                                   | Transcriptional regulator pfoR                                                          | 0.255 | 0.004 | 1.137 | 0.090 | 5.988  | 0.004 |
| 1030940 | COG2964S      | gbs1861 |        | General function predicted only |                                                                                 | Putative DNA-binding protein                                                            | 0.647 | 0.002 | 0.546 | 0.003 | 0.593  | 0.006 |
| 1030947 | COG1181M, COG | gbs1862 |        | Metabolism and transport        | Cofactors, prosthetic groups, and carriers                                      | Amino acid ligase family protein (putative polyamide biosynthesis enzyme)               | 1.195 | 0.011 | 1.999 | 0.000 | 2.467  | 0.062 |
| 1030950 | -             | gbs1863 |        | Hypothetical                    |                                                                                 | Hypothetical membrane associated protein                                                | 1.043 | 0.374 | 1.007 | 0.815 | 1.191  | 0.309 |
| 1030944 | COG3853P      | gbs1864 |        | Metabolism and transport        | Inorganic ion transport and metabolism                                          | Tellurite resistance protein                                                            | 1.131 | 0.103 | 1.021 | 0.832 | 1.653  | 0.034 |
| 1030949 | -             | gbs1865 | hsIO   | Cellular processes              | Posttranslational modification, protein turnover, chaperones                    | 33 kDa chaperonin                                                                       | 0.675 | 0.018 | 0.890 | 0.087 | 0.785  | 0.147 |
| 1030948 | COG0042J      | gbs1866 |        | Cellular processes              | Translation, ribosomal structure and biogenesis                                 | IRNA-dihydroindole synthase                                                             | 0.830 | 0.039 | 0.918 | 0.326 | 1.162  | 0.570 |
| 1030951 | COG1428F      | gbs1867 |        | Metabolism and transport        | Purines, pyrimidines, nucleosides, and nucleotides                              | Deoxyadenosine kinase (EC 2.7.1.76) Deoxyguanosine kinase (EC 2.7.1.113)                | 0.711 | 0.003 | 1.025 | 0.631 | 0.997  | 0.979 |
| 1030946 | COG1247M      | gbs1868 |        | Metabolism and transport        | Fatty acid and phospholipids                                                    | Phosphoinositric N-acetyltransferase (EC 2.3.1.-)                                       | 0.863 | 0.020 | 1.118 | 0.040 | 1.467  | 0.386 |
| 1030952 | COG0542O      | gbs1869 |        | Cellular processes              | Transcription                                                                   | Negative regulator of genetic competence clpC mecB                                      | 1.062 | 0.198 | 1.054 | 0.152 | 2.459  | 0.003 |
| 1030958 | -             | gbs1870 | ctsR   | Cellular processes              | Transcription                                                                   | Transcriptional regulator ctsR                                                          | 1.465 | 0.003 | 1.064 | 0.493 | 1.850  | 0.001 |

|         |            |         |        |                                      |                                                                   |                                                                                              |       |       |       |       |       |       |
|---------|------------|---------|--------|--------------------------------------|-------------------------------------------------------------------|----------------------------------------------------------------------------------------------|-------|-------|-------|-------|-------|-------|
| 1030969 | COG1609K   | gbs1884 | regR   | Cellular processes                   | Transcription                                                     | Transcriptional regulator, LacI family                                                       | 0.680 | 0.018 | 0.655 | 0.049 | 1.802 | 0.001 |
| 1030968 | -          | gbs1885 | -      | Hypothetical                         | -                                                                 | Oligohyaluronate lyase (EC 4.2.2.-)                                                          | 0.667 | 0.054 | 0.859 | 0.291 | 2.490 | 0.001 |
| 1030976 | -          | gbs1886 | agaD   | Metabolism and transport             | Carbohydrates, organic alcohols, and acids                        | PTS system, N-acetylglucosamine-specific IID component (EC 2.7.1.69)                         | 0.503 | 0.002 | 0.526 | 0.003 | 0.797 | 0.111 |
| 1030974 | -          | gbs1887 | -      | Metabolism and transport             | Carbohydrates, organic alcohols, and acids                        | PTS system, N-acetylglucosamine-specific IIC component (EC 2.7.1.69)                         | 0.545 | 0.006 | 0.782 | 0.202 | 0.662 | 0.078 |
| 1030980 | -          | gbs1888 | agaV   | Metabolism and transport             | Carbohydrates, organic alcohols, and acids                        | PTS system, N-acetylglucosamine-specific IIB component (EC 2.7.1.69)                         | 0.293 | 0.018 | 0.473 | 0.227 | 0.580 | 0.012 |
| 1030972 | COG4225R   | gbs1889 | -      | General function predicted only      | -                                                                 | Unsaturated glucuronyl hydrolase (EC 3.2.1.-)                                                | 0.441 | 0.017 | 0.564 | 0.132 | 0.733 | 0.098 |
| 1030988 | COG2893G   | gbs1890 | -      | Metabolism and transport             | Carbohydrates, organic alcohols, and acids                        | PTS system, N-acetylglucosamine-specific IIA component (EC 2.7.1.69)                         | 0.438 | 0.022 | 0.799 | 0.434 | 1.165 | 0.354 |
| 1030993 | COG10281QR | gbs1891 | idnO   | Metabolism and transport             | Fatty acid and phospholipids                                      | 2-deoxy-D-gluconate 3-dehydrogenase (EC 1.1.1.125)                                           | 0.619 | 0.027 | 0.702 | 0.174 | 1.690 | 0.070 |
| 1030995 | COG0698G   | gbs1892 | -      | Metabolism and transport             | Carbohydrates, organic alcohols, and acids                        | Galactose-6-phosphate isomerase LacB subunit (EC 5.3.1.26)                                   | 0.669 | 0.268 | 0.874 | 0.779 | 2.444 | 0.000 |
| 1030975 | COG0524G   | gbs1893 | -      | Metabolism and transport             | Carbohydrates, organic alcohols, and acids                        | 2-dehydro-3-deoxygluconokinase (EC 2.7.1.45)                                                 | 0.164 | 0.002 | 0.213 | 0.064 | 1.757 | 0.010 |
| 1031009 | COG0800G   | gbs1894 | kgdA   | Metabolism and transport             | Carbohydrates, organic alcohols, and acids                        | 4-Hydroxy-2-oxoglutarate aldolase (EC 4.1.3.16) 2-dehydro-3-deoxyphosphogluconate aldolase   | 0.468 | 0.028 | 0.868 | 0.782 | 2.264 | 0.008 |
| 1031001 | -          | gbs1895 | -      | Hypothetical                         | -                                                                 | Hypothetical protein                                                                         | 0.455 | 0.024 | 0.717 | 0.060 | 2.282 | 0.017 |
| 1031005 | COG3560R   | gbs1896 | -      | General function predicted only      | -                                                                 | Nitroreductase family protein                                                                | 0.750 | 0.017 | 0.891 | 0.280 | 1.083 | 0.350 |
| 1031010 | COG1846K   | gbs1897 | -      | Cellular processes                   | Transcription                                                     | Transcriptional regulator, MarR family                                                       | 0.656 | 0.000 | 0.846 | 0.028 | 0.693 | 0.090 |
| 1031006 | COG2176L   | gbs1898 | potC   | Cellular processes                   | DNA replication, recombination and repair                         | DNA polymerase III alpha subunit (EC 2.7.7.7)                                                | 0.806 | 0.010 | 0.903 | 0.137 | 0.443 | 0.032 |
| 1031003 | COG1705NU  | gbs1899 | murI.2 | Cell Envelope                        | Biosynthesis and degradation of murein sacculus and peptidoglycan | N-acetylmuramidase (EC 3.2.1.17)                                                             | 2.871 | 0.000 | 2.730 | 0.005 | 1.519 | 0.204 |
| 1031002 | COG0442J   | gbs1900 | proS   | Cellular processes                   | Translation, ribosomal structure and biogenesis                   | Prolyl-tRNA synthetase (EC 6.1.1.15)                                                         | 1.014 | 0.761 | 1.220 | 0.007 | 1.055 | 0.609 |
| 1031007 | COG0750M   | gbs1901 | -      | Cellular processes                   | Posttranslational modification, protein turnover, chaperones      | Membrane endopeptidase, M50 family                                                           | 1.250 | 0.016 | 1.390 | 0.026 | 0.658 | 0.098 |
| 1031014 | COG0575I   | gbs1902 | cdsA   | Metabolism and transport             | Fatty acid and phospholipids                                      | Phosphatidate cytidyltransferase (EC 2.7.7.41)                                               | 1.352 | 0.002 | 1.333 | 0.003 | 0.843 | 0.027 |
| 1031008 | COG0020I   | gbs1903 | uppS   | Metabolism and transport             | Fatty acid and phospholipids                                      | Undecaprenyl pyrophosphate synthetase (EC 2.5.1.31)                                          | 1.599 | 0.011 | 1.234 | 0.048 | 0.842 | 0.066 |
| 1031015 | COG1862U   | gbs1904 | yajC   | Cellular processes                   | Posttranslational modification, protein turnover, chaperones      | Protein translocase subunit YajC                                                             | 1.116 | 0.055 | 1.160 | 0.051 | 1.196 | 0.055 |
| 1031019 | -          | gbs1905 | -      | Metabolism and transport             | Energy production and conversion                                  | Thioredoxin                                                                                  | 0.971 | 0.403 | 0.927 | 0.057 | 0.819 | 0.075 |
| 1031021 | COG0281C   | gbs1906 | -      | Metabolism and transport             | Energy production and conversion                                  | NAD-dependent malic enzyme (EC 1.1.1.39)                                                     | 0.933 | 0.414 | 1.081 | 0.300 | 4.751 | 0.001 |
| 1031011 | -          | gbs1907 | malP   | Metabolism and transport             | Carbohydrates, organic alcohols, and acids                        | Malate-sodium symport                                                                        | 1.112 | 0.337 | 0.851 | 0.059 | 8.190 | 0.001 |
| 1031022 | COG3290T   | gbs1908 | dpiB   | Cellular processes                   | Signal transduction                                               | Sensor kinase dpiB (EC 2.7.3.-)                                                              | 0.765 | 0.137 | 0.599 | 0.011 | 1.123 | 0.221 |
| 1031023 | COG4565KT  | gbs1909 | dpiA   | Cellular processes                   | Transcription                                                     | Transcriptional regulatory protein                                                           | 0.529 | 0.001 | 0.580 | 0.001 | 1.063 | 0.491 |
| 1031020 | COG1087M   | gbs1910 | -      | Metabolism and transport             | Energy production and conversion                                  | UDP-glucose 4-epimerase (EC 5.1.3.2)                                                         | 1.248 | 0.001 | 1.100 | 0.058 | 1.207 | 0.033 |
| 1031027 | -          | gbs1911 | dexB   | Metabolism and transport             | Carbohydrates, organic alcohols, and acids                        | Glucan 1,6-alpha-glucosidase (EC 3.2.1.70)                                                   | 0.639 | 0.007 | 0.756 | 0.068 | 0.714 | 0.034 |
| 1031029 | COG3839G   | gbs1912 | msmK   | Metabolism and transport             | Carbohydrates, organic alcohols, and acids                        | Multiple sugar transport ATP-binding protein msmK                                            | 0.814 | 0.014 | 0.605 | 0.001 | 0.815 | 0.009 |
| 1031025 | COG2508TQ  | gbs1913 | Irp    | Cellular processes                   | Signal transduction                                               | Leucine rich protein                                                                         | 1.127 | 0.010 | 0.822 | 0.062 | 2.145 | 0.002 |
| 1031024 | COG2017G   | gbs1914 | -      | Metabolism and transport             | Carbohydrates, organic alcohols, and acids                        | Aldose 1-epimerase family protein                                                            | 1.142 | 0.274 | 1.151 | 0.282 | 2.278 | 0.003 |
| 1031035 | COG3684G   | gbs1915 | -      | Metabolism and transport             | Carbohydrates, organic alcohols, and acids                        | Tagatose-bisphosphate aldolase (EC 4.1.2.40)                                                 | 1.059 | 0.465 | 1.163 | 0.010 | 1.327 | 0.093 |
| 1031028 | COG1105G   | gbs1916 | -      | Metabolism and transport             | Carbohydrates, organic alcohols, and acids                        | Tagatose-6-phosphate kinase (EC 2.7.1.144)                                                   | 1.113 | 0.208 | 1.204 | 0.232 | 1.084 | 0.498 |
| 1031032 | COG0698G   | gbs1917 | -      | Metabolism and transport             | Carbohydrates, organic alcohols, and acids                        | Galactose-6-phosphate isomerase lacB subunit (EC 5.3.1.26)                                   | 1.216 | 0.036 | 1.401 | 0.018 | 0.525 | 0.054 |
| 1031048 | COG0698G   | gbs1918 | lacA.1 | Metabolism and transport             | Carbohydrates, organic alcohols, and acids                        | Galactose-6-phosphate isomerase lacA subunit (EC 5.3.1.26)                                   | 0.842 | 0.040 | 1.072 | 0.351 | 0.683 | 0.111 |
| 1031043 | COG4409G   | gbs1919 | -      | Metabolism and transport             | Carbohydrates, organic alcohols, and acids                        | Sialidase A precursor (EC 3.2.1.18)                                                          | 0.427 | 0.000 | 0.875 | 0.165 | 0.552 | 0.010 |
| 1031030 | COG3775G   | gbs1920 | -      | Metabolism and transport             | Carbohydrates, organic alcohols, and acids                        | PTS system, galactose-specific IIC component (EC 2.7.1.69)                                   | 0.519 | 0.000 | 0.617 | 0.008 | 0.799 | 0.057 |
| 1031054 | COG3414G   | gbs1921 | -      | Metabolism and transport             | Carbohydrates, organic alcohols, and acids                        | PTS system, galactose-specific IIB component (EC 2.7.1.69)                                   | 0.518 | 0.002 | 0.711 | 0.018 | 0.657 | 0.000 |
| 1031044 | COG1762GT  | gbs1922 | -      | Metabolism and transport             | Carbohydrates, organic alcohols, and acids                        | PTS system, galactose-specific IIA component (EC 2.7.1.69)                                   | 0.261 | 0.010 | 0.364 | 0.013 | 0.690 | 0.020 |
| 1031037 | COG1349KG  | gbs1923 | lacR.1 | Cellular processes                   | Transcription                                                     | Lactose phosphotransferase system repressor                                                  | 1.143 | 0.193 | 0.793 | 0.194 | 0.840 | 0.056 |
| 1031057 | -          | gbs1925 | -      | Mobile and extrachromosomal elements | -                                                                 | Streptococcal histidine triad protein                                                        | 0.732 | 0.006 | 1.098 | 0.621 | 0.417 | 0.114 |
| 1031045 | COG0803P   | gbs1926 | -      | Metabolism and transport             | Inorganic ion transport and metabolism                            | Laminin-binding surface protein                                                              | 0.747 | 0.043 | 0.807 | 0.215 | 0.561 | 0.004 |
| 1031062 | -          | gbs1927 | -      | Cellular processes                   | Translation, ribosomal structure and biogenesis                   | D-tyrosyl-tRNA(Tyr) deacylase (EC 3.1.-.-)                                                   | 1.240 | 0.080 | 0.747 | 0.146 | 3.046 | 0.003 |
| 1031064 | COG0317TK  | gbs1928 | relA   | Cellular processes                   | Signal transduction                                               | GTP pyrophosphokinase (EC 2.7.6.5) Guanosine-3',5'-bis(Diphosphate) 3'-pyrophosphohydrolyase | 1.029 | 0.703 | 0.739 | 0.008 | 3.038 | 0.015 |
| 1031058 | COG0737F   | gbs1929 | -      | Metabolism and transport             | Purines, pyrimidines, nucleosides, and nucleotides                | LPXTG 2-3-cyclic-nucleotide 2-phosphodiesterase (EC 3.1.4.16) 3'-nucleotidase (EC 3.1.3.6)   | 1.939 | 0.528 | 0.225 | 0.003 | 0.768 | 0.083 |
| 1031061 | COG1780F   | gbs1930 | -      | Metabolism and transport             | Purines, pyrimidines, nucleosides, and nucleotides                | NrdI protein                                                                                 | 0.120 | 0.177 | 0.837 | 0.053 | 0.841 | 0.220 |
| 1031076 | COG1363G   | gbs1931 | -      | Metabolism and transport             | Carbohydrates, organic alcohols, and acids                        | Deblocking aminopeptidase (EC 3.4.11.-)                                                      | 1.000 | 1.000 | 0.797 | 0.094 | 0.931 | 0.424 |
| 1031063 | -          | gbs1932 | -      | General function predicted only      | -                                                                 | Putative kinase                                                                              | 1.197 | 0.108 | 0.832 | 0.101 | 1.117 | 0.467 |
| 1031060 | COG1840P   | gbs1933 | -      | Metabolism and transport             | Inorganic ion transport and metabolism                            | Iron(III)-binding protein                                                                    | 0.821 | 0.045 | 0.820 | 0.088 | 1.323 | 0.059 |
| 1031078 | COG4753T   | gbs1934 | -      | Cellular processes                   | Signal transduction                                               | Two-component response regulator yesN                                                        | 0.785 | 0.099 | 0.673 | 0.010 | 1.612 | 0.007 |
| 1031079 | COG2972T   | gbs1935 | -      | Cellular processes                   | Signal transduction                                               | Two-component sensor kinase yesM (EC 2.7.3.-)                                                | 1.000 | 1.000 | 0.737 | 0.029 | 1.794 | 0.011 |
| 1031074 | -          | gbs1936 | ptsD   | Metabolism and transport             | Carbohydrates, organic alcohols, and acids                        | PTS system, mannose fructose family IID component                                            | 0.809 | 0.018 | 0.679 | 0.008 | 4.324 | 0.000 |
| 1031065 | -          | gbs1937 | ptsC   | Metabolism and transport             | Carbohydrates, organic alcohols, and acids                        | PTS system, mannose fructose family IIC component                                            | 0.119 | 0.305 | 0.212 | 0.011 | 4.911 | 0.000 |
| 1031081 | -          | gbs1938 | ptsB   | Metabolism and transport             | Carbohydrates, organic alcohols, and acids                        | PTS system, mannose fructose family IIB component                                            | 0.264 | 0.092 | 0.521 | 0.006 | 3.975 | 0.000 |
| 1031080 | COG2893G   | gbs1939 | -      | Metabolism and transport             | Carbohydrates, organic alcohols, and acids                        | PTS system, mannose fructose family IIA component                                            | 0.631 | 0.011 | 0.523 | 0.028 | 3.512 | 0.000 |
| 1031082 | -          | gbs1940 | -      | Hypothetical                         | -                                                                 | Hypothetical membrane spanning protein                                                       | 0.752 | 0.172 | 1.309 | 0.207 | 3.368 | 0.053 |
| 1031075 | -          | gbs1941 | -      | Transport and binding proteins       | Unknown substrate                                                 | Transporter                                                                                  | 1.051 | 0.139 | 0.644 | 0.008 | 0.885 | 0.427 |
| 1031084 | COG1131V   | gbs1942 | -      | Transport and binding proteins       | Unknown substrate                                                 | ABC transporter ATP-binding protein                                                          | 1.071 | 0.582 | 0.892 | 0.074 | 1.125 | 0.332 |
| 1031085 | COG2972T   | gbs1943 | fasB   | hypothetical                         | -                                                                 | Hypothetical protein                                                                         | 1.509 | 0.013 | 0.752 | 0.170 | 0.850 | 0.568 |
| 1031083 | COG3279KT  | gbs1944 | fasA   | Cellular processes                   | Transcription                                                     | Response regulator FsaA                                                                      | 1.695 | 0.002 | 0.763 | 0.054 | 1.229 | 0.402 |
| 1031089 | COG3568R   | gbs1945 | -      | General function predicted only      | -                                                                 | Endonuclease Exonuclease phosphatase family protein                                          | 0.734 | 0.067 | 1.319 | 0.124 | 0.567 | 0.011 |
| 1031087 | COG1263G   | gbs1946 | -      | Metabolism and transport             | Carbohydrates, organic alcohols, and acids                        | PTS system, glucose-specific IIABC component (EC 2.7.1.69)                                   | 0.715 | 0.026 | 1.296 | 0.047 | 1.071 | 0.671 |
| 1031091 | COG0642T   | gbs1947 | -      | Cellular processes                   | Signal transduction                                               | Phosphate regulon sensor protein phoR (EC 2.7.3.-)                                           | 1.100 | 0.260 | 1.009 | 0.892 | 2.042 | 0.001 |
| 1031090 | COG0745TK  | gbs1948 | -      | Cellular processes                   | Signal transduction                                               | Alkaline phosphatase synthesis two-component response regulator phoP                         | 1.388 | 0.002 | 1.158 | 0.101 | 1.603 | 0.035 |
| 1031086 | COG0704P   | gbs1949 | -      | Metabolism and transport             | Inorganic ion transport and metabolism                            | Phosphate transport system protein phoU                                                      | 0.991 | 0.901 | 1.455 | 0.048 | 1.199 | 0.389 |
| 1031103 | COG1117P   | gbs1950 | -      | Metabolism and transport             | Inorganic ion transport and metabolism                            | Phosphate transport ATP-binding protein ptsB                                                 | 1.298 | 0.055 | 1.154 | 0.487 | 2.557 | 0.034 |
| 1031094 | COG0581P   | gbs1951 | -      | Metabolism and transport             | Inorganic ion transport and metabolism                            | Phosphate transport system permease protein ptsA                                             | 0.893 | 0.270 | 1.522 | 0.152 | 0.713 | 0.646 |
| 1031092 | COG0573P   | gbs1952 | -      | Metabolism and transport             | Inorganic ion transport and metabolism                            | Phosphate transport system permease protein ptsC                                             | 1.159 | 0.430 | 1.079 | 0.435 | 0.975 | 0.768 |
| 1031095 | COG0226P   | gbs1953 | -      | Metabolism and transport             | Inorganic ion transport and metabolism                            | probable hemolysin precursor                                                                 | 1.049 | 0.649 | 1.655 | 0.067 | 1.521 | 0.322 |
| 1031108 | -          | gbs1954 | -      | Hypothetical                         | -                                                                 | Hypothetical protein                                                                         | 0.647 | 0.000 | 0.975 | 0.707 | 1.375 | 0.046 |
| 1031100 | COG1385S   | gbs1955 | -      | Hypothetical                         | -                                                                 | Hypothetical cytosolic protein                                                               | 0.792 | 0.105 | 0.984 | 0.846 | 1.133 | 0.496 |
| 1031096 | COG2264J   | gbs1956 | -      | Cellular processes                   | Translation, ribosomal structure and biogenesis                   | Ribosomal protein L11 methyltransferase (EC 2.1.1.-)                                         | 0.713 | 0.028 | 0.943 | 0.322 | 1.208 | 0.073 |
| 1031099 | COG4815S   | gbs1957 | -      | Hypothetical                         | -                                                                 | Hypothetical cytosolic protein                                                               | 0.782 | 0.021 | 0.944 | 0.235 | 1.122 | 0.229 |
| 1031111 | COG0789K   | gbs1958 | -      | Cellular processes                   | Transcription                                                     | Transcriptional activator tipA                                                               | 2.166 | 0.000 | 1.334 | 0.008 | 0.928 | 0.612 |
| 1031101 | -          | gbs1959 | -      | Metabolism and transport             | Central intermediary metabolism                                   | Acetyltransferase (EC 2.3.1.-)                                                               | 0.862 | 0.094 | 0.886 | 0.027 | 1.243 | 0.013 |
| 1031110 | COG0494LR  | gbs1960 | -      | Cellular processes                   | DNA replication, recombination and repair                         | Phosphohydrolase (MutT nudix family protein)                                                 | 0.862 | 0.002 | 1.008 | 0.814 | 1.274 | 0.010 |
| 1031106 | -          | gbs1961 | -      | Hypothetical                         | -                                                                 | Hypothetical protein                                                                         | 0.689 | 0.002 | 0.850 | 0.009 | 1.396 | 0.066 |
| 1031114 | -          | gbs1962 | -      | Hypothetical                         | -                                                                 | Hypothetical protein                                                                         | 0.806 | 0.060 | 0.855 | 0.068 | 1.391 | 0.023 |
| 1031107 | -          | gbs1963 | -      | Metabolism and transport             | Central intermediary metabolism                                   | Acetyltransferase, GNAT family                                                               | 1.062 | 0.285 | 1.105 | 0.082 | 2.137 | 0.003 |
| 1031118 | COG2256L   | gbs1964 | -      | Cellular processes                   | DNA replication, recombination and repair                         | ATPase, AAA family                                                                           | 0.938 | 0.285 | 1.071 | 0.403 | 1.904 | 0.003 |
| 1031109 | -          | gbs1965 | -      | Hypothetical                         | -                                                                 | Hypothetical protein                                                                         | 1.453 | 0.008 | 0.862 | 0.470 | 1.107 | 0.688 |
| 1031119 | -          | gbs1966 | -      | Hypothetical                         | -                                                                 | Hypothetical protein                                                                         | 1.484 | 0.027 | 0.875 | 0.508 | 1.530 | 0.028 |
| 1031129 | -          | gbs1967 | -      | Hypothetical                         | -                                                                 | Hypothetical cytosolic protein                                                               | 1.040 | 0.571 | 0.852 | 0.086 | 1.130 | 0.182 |
| 1031122 | -          | gbs1968 | -      | Hypothetical                         | -                                                                 | Hypothetical protein                                                                         | 1.277 | 0.050 | 0.905 | 0.169 | 0.816 | 0.345 |
| 1031130 | -          | gbs1969 | -      | Mobile and extrachromosomal elements | -                                                                 | DNA integration recombination inversion protein                                              | 0.554 | 0.021 | 0.643 | 0.024 | 0.390 | 0.012 |
| 1031133 | -          | gbs1970 | -      | Hypothetical                         | -                                                                 | Hypothetical protein                                                                         | 0.476 | 0.016 | 0.445 | 0.018 | 0.471 | 0.511 |
| 1031135 | -          | gbs1971 | -      | Hypothetical                         | -                                                                 | Hypothetical protein                                                                         | 0.491 | 0.025 | 0.542 | 0.028 | 0.545 | 0.045 |
| 1031136 | COG1396K   |         |        |                                      |                                                                   |                                                                                              |       |       |       |       |       |       |



|         |               |         |       |                                 |                                                                   |                                                                                              |       |       |       |       |        |       |
|---------|---------------|---------|-------|---------------------------------|-------------------------------------------------------------------|----------------------------------------------------------------------------------------------|-------|-------|-------|-------|--------|-------|
| 1031137 | -             | gbs1977 | -     | Hypothetical                    |                                                                   | Hypothetical protein                                                                         | 1.606 | 0.001 | 1.211 | 0.170 | 1.005  | 0.967 |
| 1031131 | -             | gbs1978 | -     | Hypothetical                    |                                                                   | Hypothetical protein                                                                         | 1.214 | 0.112 | 1.087 | 0.525 | 0.765  | 0.271 |
| 1031134 | COG4842S      | gbs1979 | -     | Cellular processes              | Posttranslational modification, protein turnover, chaperones      | a small heat shock protein of Clostridium acetobutylicum homolog lmo0056                     | 1.682 | 0.024 | 0.552 | 0.220 | 0.426  | 0.359 |
| 1031144 | -             | gbs1980 | -     | Hypothetical                    |                                                                   | Hypothetical secreted protein                                                                | 0.955 | 0.609 | 0.677 | 0.033 | 0.745  | 0.336 |
| 1031178 | -             | gbs1981 | -     | Hypothetical                    |                                                                   | Hypothetical protein                                                                         | 0.689 | 0.001 | 0.843 | 0.029 | 2.474  | 0.000 |
| 1031222 | COG3077L      | gbs1982 | -     | Cellular processes              | DNA replication, recombination and repair                         | DNA-damage-inducible protein J                                                               | 0.356 | 0.023 | 0.489 | 0.000 | 0.066  | 0.153 |
| 1031139 | -             | gbs1983 | -     | Hypothetical                    |                                                                   | Hypothetical protein                                                                         | 1.030 | 0.793 | 0.890 | 0.479 | 1.353  | 0.533 |
| 1031221 | -             | gbs1984 | -     | Hypothetical                    |                                                                   | Hypothetical protein                                                                         | 1.018 | 0.762 | 0.874 | 0.123 | 1.737  | 0.048 |
| 1031226 | -             | gbs1985 | -     | Hypothetical                    |                                                                   | Hypothetical membrane spanning protein                                                       | 1.176 | 0.052 | 0.909 | 0.112 | 1.736  | 0.013 |
| 1031224 | COG0488R, COG | gbs1986 | -     | Transport and binding proteins  | Unknown substrate                                                 | ABC transporter ATP-binding protein                                                          | 1.718 | 0.005 | 1.036 | 0.645 | 1.377  | 0.253 |
| 1031252 | -             | gbs1987 | -     | Cellular processes              | Toxin production and resistance                                   | Streptomycin adenylyltransferase (Aminoglycoside 6-adenylyltransferase) (Aminoglycoside ader | 1.302 | 0.029 | 0.879 | 0.150 | 0.688  | 0.002 |
| 1031273 | -             | gbs1988 | -     | Hypothetical                    |                                                                   | Hypothetical protein                                                                         | 1.189 | 0.138 | 0.867 | 0.237 | 0.768  | 0.194 |
| 1031271 | -             | gbs1989 | -     | Hypothetical                    |                                                                   | Hypothetical protein                                                                         | 1.602 | 0.014 | 0.862 | 0.204 | 0.505  | 0.002 |
| 1031272 | COG1695K      | gbs1990 | -     | Cellular processes              | Transcription                                                     | Transcriptional regulator, PadR family                                                       | 1.470 | 0.015 | 1.085 | 0.619 | 0.674  | 0.037 |
| 1031274 | -             | gbs1991 | -     | Metabolism and transport        | Central intermediary metabolism                                   | Acetyltransferase, GNAT family                                                               | 1.369 | 0.001 | 0.649 | 0.006 | 0.464  | 0.009 |
| 1031282 | -             | gbs1992 | -     | Transport and binding proteins  | Unknown substrate                                                 | ABC transporter permease protein                                                             | 0.854 | 0.030 | 0.770 | 0.053 | 0.471  | 0.007 |
| 1031275 | COG1131V      | gbs1993 | -     | Transport and binding proteins  | Unknown substrate                                                 | ABC transporter ATP-binding protein                                                          | 0.515 | 0.003 | 0.616 | 0.058 | 0.758  | 0.123 |
| 1031279 | COG1396K      | gbs1994 | -     | Cellular processes              | Transcription                                                     | Transcriptional regulator, Cro Cj family                                                     | 0.545 | 0.030 | 0.663 | 0.035 | 0.624  | 0.256 |
| 1031276 | -             | gbs1995 | -     | Metabolism and transport        | Fatty acid and phospholipids                                      | Phosphatidylglycerophosphatase B homolog                                                     | 1.393 | 0.011 | 0.624 | 0.004 | 0.354  | 0.007 |
| 1031286 | COG1694R      | gbs1996 | -     | Hypothetical                    |                                                                   | Hypothetical protein                                                                         | 1.345 | 0.044 | 0.706 | 0.040 | 0.774  | 0.218 |
| 1031281 | COG1611R      | gbs1997 | -     | General function predicted only |                                                                   | Lysine decarboxylase family                                                                  | 1.439 | 0.004 | 0.746 | 0.016 | 0.729  | 0.053 |
| 1031284 | COG1266R      | gbs1998 | -     | Cellular processes              | Posttranslational modification, protein turnover, chaperones      | CAAX amino terminal protease family                                                          | 1.262 | 0.017 | 0.711 | 0.022 | 0.904  | 0.567 |
| 1031280 | COG0607P      | gbs1999 | -     | Metabolism and transport        | Inorganic ion transport and metabolism                            | Rhodanese-related sulfurtransferases                                                         | 0.468 | 0.000 | 0.613 | 0.005 | 0.591  | 0.009 |
| 1031278 | -             | gbs2000 | cfb   | Cellular processes              | Transcription                                                     | CAMP factor                                                                                  | 0.542 | 0.000 | 0.659 | 0.000 | 0.637  | 0.005 |
| 1031283 | COG0563F      | gbs2001 | flaR  | Metabolism and transport        | Purines, pyrimidines, nucleosides, and nucleotides                | DNA topology modulation protein flaR-related protein                                         | 0.674 | 0.021 | 0.627 | 0.050 | 0.615  | 0.018 |
| 1031285 | COG0371C      | gbs2002 | -     | Metabolism and transport        | Energy production and conversion                                  | Glycerol dehydrogenase (EC 1.1.1.6)                                                          | 1.141 | 0.047 | 0.958 | 0.658 | 0.694  | 0.223 |
| 1031288 | COG4420S      | gbs2003 | -     | Hypothetical                    |                                                                   | Hypothetical membrane spanning protein                                                       | 2.088 | 0.018 | 0.962 | 0.460 | 1.300  | 0.149 |
| 1031287 | COG0646E, COG | gbs2004 | -     | Metabolism and transport        | Amino acids, peptides, amino sugars and amines                    | 5-methyltetrahydrofolate-homocysteine methyltransferase (EC 2.1.1.13) homocysteine-binding   | 0.349 | 0.012 | 0.354 | 0.025 | 0.624  | 0.584 |
| 1031289 | COG0620E      | gbs2005 | -     | Metabolism and transport        | Amino acids, peptides, amino sugars and amines                    | 5-methyltetrahydropteroylglutamate-homocysteine methyltransferase (EC 2.1.1.14)              | 0.414 | 0.004 | 0.413 | 0.011 | 0.694  | 0.290 |
| 1031291 | COG4392S      | gbs2006 | -     | Metabolism and transport        | Amino acids, peptides, amino sugars and amines                    | Branched-chain amino acid transport protein aziD                                             | 0.850 | 0.043 | 1.201 | 0.076 | 0.625  | 0.596 |
| 1031296 | COG1296E      | gbs2007 | -     | Metabolism and transport        | Amino acids, peptides, amino sugars and amines                    | Branched-chain amino acid transport protein aziC                                             | 0.827 | 0.031 | 1.107 | 0.402 | 0.627  | 0.027 |
| 1031304 | COG1404O      | gbs2008 | -     | Cellular processes              | Posttranslational modification, protein turnover, chaperones      | LPXTG Endopeptidase lactocepin (EC 3.4.21.96)                                                | 1.740 | 0.021 | 2.833 | 0.016 | 1.038  | 0.960 |
| 1031388 | COG0745TK     | gbs2009 | -     | Cellular processes              | Transcription                                                     | Transcriptional regulatory protein                                                           | 2.395 | 0.001 | 2.376 | 0.012 | 0.715  | 0.029 |
| 1031308 | COG0642T      | gbs2010 | -     | Cellular processes              | Signal transduction                                               | Two component system histidine kinase (EC 2.7.3.-)                                           | 1.846 | 0.009 | 2.110 | 0.002 | 0.565  | 0.024 |
| 1031392 | -             | gbs2011 | -     | Hypothetical                    |                                                                   | Hypothetical protein                                                                         | 1.469 | 0.013 | 1.742 | 0.008 | 0.610  | 0.075 |
| 1031290 | COG0495J      | gbs2012 | leuS  | Cellular processes              | Translation, ribosomal structure and biogenesis                   | Leucyl-tRNA synthetase (EC 6.1.1.4)                                                          | 0.639 | 0.001 | 0.786 | 0.005 | 2.767  | 0.002 |
| 1031390 | -             | gbs2013 | -     | Transport and binding proteins  | Unknown substrate                                                 | Transporter, MFS superfamily                                                                 | 1.775 | 0.003 | 0.209 | 0.001 | 1.752  | 0.015 |
| 1031391 | COG4667R      | gbs2014 | -     | Cellular processes              | Posttranslational modification, protein turnover, chaperones      | Phospholipase (EC 3.1.-.-)                                                                   | 0.929 | 0.329 | 1.460 | 0.012 | 1.683  | 0.035 |
| 1031395 | COG1442M      | gbs2015 | -     | Metabolism and transport        | Central intermediary metabolism                                   | Glycosyl transferase, family 8                                                               | 0.911 | 0.125 | 0.876 | 0.163 | 2.613  | 0.085 |
| 1031328 | COG1442M      | gbs2016 | -     | Metabolism and transport        | Central intermediary metabolism                                   | Glycosyl transferase, family 8                                                               | 1.011 | 0.784 | 0.947 | 0.072 | 1.657  | 0.035 |
| 1031405 | COG0250K      | gbs2017 | nusG  | Cellular processes              | Transcription                                                     | Transcription antitermination protein nusG                                                   | 0.910 | 0.080 | 1.149 | 0.009 | 1.796  | 0.000 |
| 1031394 | -             | gbs2018 | bibA  | Hypothetical                    |                                                                   | LPXTG Hypothetical protein                                                                   | 0.637 | 0.011 | 0.520 | 0.010 | 0.374  | 0.003 |
| 1031393 | COG0690U      | gbs2019 | secE  | Cellular processes              | Posttranslational modification, protein turnover, chaperones      | Protein translocase subunit secE                                                             | 1.066 | 0.101 | 1.078 | 0.095 | 1.722  | 0.006 |
| 1031409 | COG0744M      | gbs2020 | pbp2A | Cell Envelope                   | Biosynthesis and degradation of murein sacculus and peptidoglycan | Multimodular transpeptidase-transglycosylase PBP 2A                                          | 1.454 | 0.001 | 1.365 | 0.027 | 0.893  | 0.592 |
| 1031404 | COG0564J      | gbs2021 | -     | Cellular processes              | Translation, ribosomal structure and biogenesis                   | Ribosomal large subunit pseudouridine synthase D (EC 4.2.1.70)                               | 1.102 | 0.076 | 1.009 | 0.921 | 1.120  | 0.540 |
| 1031397 | COG4640S      | gbs2022 | -     | Hypothetical                    |                                                                   | Hypothetical protein                                                                         | 0.703 | 0.001 | 0.772 | 0.007 | 0.791  | 0.174 |
| 1031407 | COG0274F      | gbs2024 | deoC  | Metabolism and transport        | Purines, pyrimidines, nucleosides, and nucleotides                | Deoxyribose-phosphate aldolase (EC 4.1.2.4)                                                  | 1.032 | 0.043 | 0.724 | 0.015 | 0.374  | 0.001 |
| 1031408 | -             | gbs2025 | nupC  | Metabolism and transport        | Purines, pyrimidines, nucleosides, and nucleotides                | Nucleoside permease nupC                                                                     | 1.035 | 0.280 | 0.633 | 0.000 | 0.288  | 0.009 |
| 1031412 | COG2820F      | gbs2026 | udp   | Metabolism and transport        | Purines, pyrimidines, nucleosides, and nucleotides                | Uridine phosphorylase (EC 2.4.2.3)                                                           | 0.971 | 0.330 | 0.561 | 0.000 | 0.337  | 0.002 |
| 1031415 | COG2188K      | gbs2027 | crgR  | Cellular processes              | Transcription                                                     | Transcriptional regulator, GntR family                                                       | 1.351 | 0.005 | 0.597 | 0.002 | 0.290  | 0.003 |
| 1031414 | -             | gbs2028 | -     | Hypothetical                    |                                                                   | Hypothetical protein                                                                         | 1.256 | 0.033 | 0.647 | 0.001 | 0.341  | 0.141 |
| 1031419 | COG0459O      | gbs2029 | groEL | Cellular processes              | Posttranslational modification, protein turnover, chaperones      | 60 kDa chaperonin GROEL                                                                      | 0.828 | 0.119 | 0.830 | 0.062 | 1.166  | 0.092 |
| 1031421 | COG0234O      | gbs2030 | groES | Cellular processes              | Posttranslational modification, protein turnover, chaperones      | 10 kDa chaperonin GROES                                                                      | 0.914 | 0.280 | 0.993 | 0.955 | 0.790  | 0.006 |
| 1031427 | COG1110R      | gbs2031 | -     | Transport and binding proteins  | Unknown substrate                                                 | ABC transporter ATP-binding protein                                                          | 0.176 | 0.003 | 0.325 | 0.009 | 2.896  | 0.103 |
| 1031423 | COG4120R      | gbs2032 | -     | Transport and binding proteins  | Unknown substrate                                                 | ABC transporter permease protein                                                             | 0.153 | 0.014 | 0.292 | 0.008 | 1.958  | 0.104 |
| 1031435 | COG2984R      | gbs2033 | -     | Transport and binding proteins  | Unknown substrate                                                 | ABC transporter substrate-binding protein                                                    | 0.191 | 0.003 | 0.233 | 0.000 | 1.781  | 0.553 |
| 1031459 | COG0561R      | gbs2034 | -     | Metabolism and transport        | Central intermediary metabolism                                   | Hydrolase (HAD superfamily)                                                                  | 1.140 | 0.145 | 0.917 | 0.367 | 0.883  | 0.681 |
| 1031451 | COG2514R      | gbs2035 | -     | Metabolism and transport        | Energy production and conversion                                  | Glyoxalase family protein                                                                    | 2.239 | 0.001 | 0.844 | 0.527 | 0.917  | 0.954 |
| 1031452 | COG3022S      | gbs2036 | yaaA  | Hypothetical                    |                                                                   | Hypothetical cytosolic protein                                                               | 0.825 | 0.050 | 1.044 | 0.313 | 1.009  | 0.002 |
| 1031438 | COG0602O      | gbs2037 | nrdG  | Cellular processes              | Posttranslational modification, protein turnover, chaperones      | Anaerobic ribonucleoside-triphosphate reductase activating protein                           | 0.666 | 0.005 | 0.446 | 0.006 | 0.146  | 0.001 |
| 1031463 | COG3981R      | gbs2038 | -     | Metabolism and transport        | Central intermediary metabolism                                   | Acetyltransferase (EC 2.3.1.-)                                                               | 0.760 | 0.028 | 0.639 | 0.000 | 0.274  | 0.001 |
| 1031457 | COG0673R      | gbs2039 | -     | Metabolism and transport        | Central intermediary metabolism                                   | NAD-dependent oxidoreductase                                                                 | 0.766 | 0.009 | 0.604 | 0.000 | 0.276  | 0.021 |
| 1031458 | -             | gbs2040 | -     | Hypothetical                    |                                                                   | Hypothetical protein                                                                         | 0.600 | 0.003 | 0.725 | 0.005 | 0.325  | 0.034 |
| 1031480 | COG1328F      | gbs2041 | nrdD  | Metabolism and transport        | Purines, pyrimidines, nucleosides, and nucleotides                | Anaerobic ribonucleoside-triphosphate reductase (EC 1.17.4.2)                                | 0.333 | 0.004 | 0.592 | 0.004 | 0.274  | 0.011 |
| 1031460 | -             | gbs2042 | -     | Hypothetical                    |                                                                   | Hypothetical membrane spanning protein                                                       | 0.745 | 0.015 | 0.726 | 0.012 | 1.450  | 0.039 |
| 1031467 | COG3906S      | gbs2043 | -     | Hypothetical                    |                                                                   | Hypothetical cytosolic protein                                                               | 1.941 | 0.001 | 1.352 | 0.013 | 0.959  | 0.752 |
| 1031487 | -             | gbs2044 | -     | Cellular processes              | DNA replication, recombination and repair                         | Endonuclease involved in recombination                                                       | 1.582 | 0.000 | 1.286 | 0.001 | 0.959  | 0.547 |
| 1031478 | -             | gbs2045 | -     | Hypothetical                    |                                                                   | Hypothetical cytosolic protein                                                               | 1.770 | 0.000 | 1.284 | 0.004 | 0.784  | 0.169 |
| 1031465 | COG1393P      | gbs2046 | spxA  | Metabolism and transport        | Inorganic ion transport and metabolism                            | Arsenate reductase family protein                                                            | 1.924 | 0.002 | 2.813 | 0.000 | 0.482  | 0.000 |
| 1031471 | COG0468L      | gbs2047 | recA  | Cellular processes              | DNA replication, recombination and repair                         | RecA protein                                                                                 | 1.072 | 0.198 | 1.101 | 0.010 | 1.595  | 0.024 |
| 1031601 | COG1058R, COG | gbs2048 | cinA  | General function predicted only |                                                                   | Colligrin                                                                                    | 1.650 | 0.004 | 1.557 | 0.003 | 1.386  | 0.013 |
| 1031543 | -             | gbs2049 | tag   | Cellular processes              | DNA replication, recombination and repair                         | DNA-3-methyladenine glycosylase (EC 3.2.2.20)                                                | 1.128 | 0.128 | 0.973 | 0.561 | 5.879  | 0.001 |
| 1031545 | COG0632L      | gbs2050 | ruvA  | Cellular processes              | DNA replication, recombination and repair                         | Holliday junction DNA helicase ruvA                                                          | 1.110 | 0.104 | 1.000 | 0.997 | 15.184 | 0.000 |
| 1031501 | -             | gbs2051 | ImpP  | Cellular processes              | Toxin production and resistance                                   | Multidrug resistance protein impP                                                            | 1.117 | 0.042 | 0.945 | 0.125 | 5.742  | 0.000 |
| 1031648 | COG0323L      | gbs2052 | mutL  | Cellular processes              | DNA replication, recombination and repair                         | DNA mismatch repair protein mutL                                                             | 1.545 | 0.000 | 0.994 | 0.946 | 2.673  | 0.001 |
| 1031494 | -             | gbs2053 | csp   | Cellular processes              | Posttranslational modification, protein turnover, chaperones      | Cold shock protein                                                                           | 2.889 | 0.001 | 2.980 | 0.002 | 3.051  | 0.008 |
| 1031681 | COG0249L      | gbs2054 | mutS  | Cellular processes              | DNA replication, recombination and repair                         | DNA mismatch repair protein mutS                                                             | 0.803 | 0.004 | 1.060 | 0.204 | 1.760  | 0.000 |
| 1031544 | COG1438K      | gbs2055 | argR2 | Cellular processes              | Transcription                                                     | Arginine repressor, argR                                                                     | 0.883 | 0.193 | 0.867 | 0.017 | 1.136  | 0.268 |
| 1031682 | COG0018J      | gbs2056 | argS  | Cellular processes              | Translation, ribosomal structure and biogenesis                   | Arginyl-tRNA synthetase (EC 6.1.1.19)                                                        | 0.957 | 0.298 | 0.936 | 0.098 | 3.458  | 0.001 |
| 1031685 | -             | gbs2057 | uvrB  | -                               | -                                                                 | Bacteriocin uvrB                                                                             | 1.666 | 0.000 | 1.899 | 0.003 | 0.554  | 0.044 |
| 1031680 | COG1284S      | gbs2058 | -     | Hypothetical                    |                                                                   | Hypothetical membrane spanning protein                                                       | 0.697 | 0.001 | 0.928 | 0.315 | 0.621  | 0.088 |
| 1030780 | COG1284S      | gbs2059 | -     | Hypothetical                    |                                                                   | Hypothetical membrane spanning protein                                                       | 0.778 | 0.000 | 1.029 | 0.413 | 1.516  | 0.014 |
| 1031827 | COG0173J      | gbs2060 | aspS  | Cellular processes              | Translation, ribosomal structure and biogenesis                   | Aspartyl-tRNA synthetase (EC 6.1.1.12)                                                       | 0.850 | 0.000 | 1.090 | 0.060 | 1.352  | 0.133 |
| 1031683 | COG0124J      | gbs2061 | hisS  | Cellular processes              | Translation, ribosomal structure and biogenesis                   | Histidyl-tRNA synthetase (EC 6.1.1.21)                                                       | 0.904 | 0.010 | 0.837 | 0.003 | 1.141  | 0.477 |
| 1031684 | COG0333J      | gbs2062 | rpmF  | Cellular processes              | Translation, ribosomal structure and biogenesis                   | LSU ribosomal protein L32P                                                                   | 0.832 | 0.004 | 1.091 | 0.009 | 1.102  | 0.602 |
| 1030811 | COG0267J      | gbs2063 | rpmG  | Cellular processes              | Translation, ribosomal structure and biogenesis                   | LSU ribosomal protein L33P                                                                   | 0.805 | 0.052 | 1.126 | 0.093 | 1.397  | 0.058 |
| 1030716 | -             | gbs2064 | cadD  | Cellular processes              | Toxin production and resistance                                   | Cadmium resistance protein                                                                   | 1.434 | 0.004 | 0.901 | 0.272 | 2.135  | 0.098 |
| 1030808 | COG0640K      | gbs2065 | cadC  | Cellular processes              | Toxin production and resistance                                   | Cadmium efflux system accessory protein                                                      | 1.641 | 0.016 | 0.999 | 0.993 | 1.288  | 0.180 |
| 1030814 | -             | gbs2066 | -     | Hypothetical                    |                                                                   | Hypothetical protein                                                                         | 1.358 | 0.015 | 0.928 | 0.032 | 2.467  | 0.000 |
| 1030813 | -             | gbs2067 | -     | Hypothetical                    |                                                                   | Hypothetical protein                                                                         | 0.599 | 0.091 | 0.904 | 0.487 | 2.545  | 0.085 |
| 1030815 | -             | gbs2068 | -     | Hypothetical                    |                                                                   | Hypothetical protein                                                                         | 1.825 | 0.008 | 1.613 |       |        |       |

|         |           |         |        |                                      |                                                                                 |                                                                                   |       |       |       |       |       |       |
|---------|-----------|---------|--------|--------------------------------------|---------------------------------------------------------------------------------|-----------------------------------------------------------------------------------|-------|-------|-------|-------|-------|-------|
| 1031433 | -         | gbs2070 |        | Hypothetical                         |                                                                                 | Hypothetical protein                                                              | 1.488 | 0.019 | 1.071 | 0.676 | 0.930 | 0.385 |
| 1030817 | -         | gbs2071 |        | Mobile and extrachromosomal elements |                                                                                 | Replication protein                                                               | 1.523 | 0.011 | 1.450 | 0.093 | 0.619 | 0.063 |
| 1030783 | -         | gbs2072 |        | Mobile and extrachromosomal elements |                                                                                 | Phage protein                                                                     | 1.087 | 0.739 | 0.928 | 0.725 | 0.658 | 0.292 |
| 1030747 | COG0582L  | gbs2073 |        | Mobile and extrachromosomal elements |                                                                                 | DNA integration recombination inversion protein                                   | 1.897 | 0.008 | 1.576 | 0.000 | 0.770 | 0.168 |
| 1030842 | -         | gbs2074 |        | Hypothetical                         |                                                                                 | Hypothetical cytosolic protein                                                    | 0.881 | 0.017 | 0.786 | 0.184 | 1.838 | 0.011 |
| 1030781 | -         | gbs2076 |        | Hypothetical                         |                                                                                 | Hypothetical protein                                                              | 1.507 | 0.000 | 1.058 | 0.264 | 0.775 | 0.338 |
| 1030820 | -         | gbs2077 |        | Hypothetical                         |                                                                                 | Hypothetical protein                                                              | 1.446 | 0.039 | 1.008 | 0.911 | 0.989 | 0.939 |
| 1031055 | COG3212S  | gbs2080 |        | Hypothetical                         |                                                                                 | Hypothetical protein                                                              | 0.509 | 0.027 | 0.575 | 0.075 | 0.736 | 0.550 |
| 1030819 | COG0745TK | gbs2081 |        | Cellular processes                   | Transcription                                                                   | Transcriptional regulatory protein                                                | 1.075 | 0.113 | 0.851 | 0.136 | 1.346 | 0.041 |
| 1030759 | COG0642T  | gbs2082 |        | Cellular processes                   | Signal transduction                                                             | Two-component sensor kinase czcS (EC 2.7.3.-)                                     | 1.040 | 0.335 | 0.935 | 0.193 | 1.330 | 0.072 |
| 1030703 | COG1288S  | gbs2083 |        | Metabolism and transport             | Amino acids, peptides, aminoglycans and amines                                  | Arginine ornithine antiporter                                                     | 0.178 | 0.016 | 0.260 | 0.002 | 3.294 | 0.002 |
| 1030750 | COG0549E  | gbs2084 |        | Metabolism and transport             | Amino acids, peptides, aminoglycans and amines                                  | Carbamate kinase (EC 2.7.2.2)                                                     | 0.930 | 0.418 | 0.698 | 0.231 | 2.476 | 0.001 |
| 1031013 | COG0078E  | gbs2085 |        | Metabolism and transport             | Amino acids, peptides, aminoglycans and amines                                  | Ornithine carbamoyltransferase (EC 2.1.3.3)                                       | 0.864 | 0.096 | 0.873 | 0.231 | 2.077 | 0.002 |
| 1031066 | COG0642T  | gbs2086 |        | Cellular processes                   | Signal transduction                                                             | Sporulation kinase A (EC 2.7.3.-)                                                 | 1.215 | 0.034 | 1.355 | 0.010 | 0.544 | 0.035 |
| 1030729 | COG4753T  | gbs2087 |        | Cellular processes                   | Signal transduction                                                             | Two-component response regulator                                                  | 1.103 | 0.105 | 1.172 | 0.269 | 0.535 | 0.005 |
| 1031098 | COG1125E  | gbs2088 | proV   | Metabolism and transport             | Amino acids, peptides, aminoglycans and amines                                  | Glycine betaine transport ATP-binding protein                                     | 3.160 | 0.018 | 1.708 | 0.019 | 2.599 | 0.006 |
| 1030749 | COG1174E  | COG2089 |        | Metabolism and transport             | Amino acids, peptides, aminoglycans and amines                                  | Glycine betaine transport system permease protein Glycine betaine-binding protein | 2.072 | 0.011 | 1.609 | 0.003 | 3.338 | 0.001 |
| 1031102 | COG0392S  | COG2090 |        | General function predicted only      |                                                                                 | Lysylcardiolipin synthase (EC 2.3.2.-) Lysyltransferase (EC 2.3.2.3)              | 1.828 | 0.002 | 1.546 | 0.015 | 1.394 | 0.014 |
| 1031088 | COG0596R  | gbs2091 |        | General function predicted only      |                                                                                 | Non-heme chloroperoxidase (EC 1.11.1.10)                                          | 2.633 | 0.000 | 1.868 | 0.003 | 1.180 | 0.056 |
| 1030688 | COG3759S  | gbs2092 |        | Hypothetical                         |                                                                                 | Hypothetical membrane spanning protein                                            | 1.450 | 0.098 | 1.094 | 0.566 | 0.807 | 0.687 |
| 1030562 | COG1511S  | gbs2093 |        | Mobile and extrachromosomal elements |                                                                                 | Phage infection protein                                                           | 1.493 | 0.010 | 1.643 | 0.017 | 1.292 | 0.435 |
| 1030957 | COG1309K  | gbs2094 |        | Cellular processes                   | Transcription                                                                   | Transcriptional regulator, TetR family                                            | 0.537 | 0.050 | 0.855 | 0.415 | 0.297 | 0.061 |
| 1030235 | -         | gbs2095 |        | Hypothetical                         |                                                                                 | Hypothetical protein                                                              | 0.654 | 0.030 | 0.649 | 0.003 | 1.362 | 0.343 |
| 1029847 | COG0522J  | gbs2096 | rpsD   | Cellular processes                   | Translation, ribosomal structure and biogenesis                                 | SSU ribosomal protein S4P                                                         | 0.879 | 0.003 | 1.136 | 0.046 | 0.838 | 0.086 |
| 1031112 | -         | gbs2097 |        | Hypothetical                         |                                                                                 | Hypothetical protein                                                              | 0.854 | 0.108 | 0.965 | 0.709 | 2.921 | 0.008 |
| 1031046 | COG0305L  | gbs2098 | hoB    | Cellular processes                   | DNA replication, recombination and repair                                       | Replicative DNA helicase (EC 3.6.1.-)                                             | 0.956 | 0.202 | 1.130 | 0.165 | 2.939 | 0.000 |
| 1030821 | COG0359J  | gbs2099 | rplI   | Cellular processes                   | Translation, ribosomal structure and biogenesis                                 | LSU ribosomal protein L9P                                                         | 1.081 | 0.388 | 1.130 | 0.135 | 1.903 | 0.001 |
| 1030960 | COG3887T  | gbs2100 |        | Metabolism and transport             | Central intermediary metabolism                                                 | Phosphoesterase, DHH family protein                                               | 1.007 | 0.599 | 0.967 | 0.106 | 1.873 | 0.028 |
| 1030341 | COG0445D  | gbs2101 | gidA   | General function predicted only      |                                                                                 | Putative tRNA (5-carboxymethylaminomethyl-2-thiouridylate) synthase subunit GidA  | 0.678 | 0.000 | 1.286 | 0.010 | 2.274 | 0.019 |
| 1031036 | COG2095U  | gbs2102 |        | Cell Envelope                        | Other                                                                           | MarC family integral membrane protein                                             | 0.681 | 0.001 | 0.664 | 0.001 | 1.599 | 0.010 |
| 1030810 | COG0482J  | gbs2103 | trmU   | Cellular processes                   | Translation, ribosomal structure and biogenesis                                 | tRNA (5-methylaminomethyl-2-thiouridylate)-methyltransferase (EC 2.1.1.61)        | 0.647 | 0.002 | 0.651 | 0.010 | 1.584 | 0.075 |
| 1031056 | COG1760E  | gbs2104 | sdhB   | Metabolism and transport             | Amino acids, peptides, aminoglycans and amines                                  | L-serine dehydratase beta subunit (EC 4.3.1.17)                                   | 0.487 | 0.000 | 1.654 | 0.000 | 5.151 | 0.001 |
| 1030711 | COG1760E  | gbs2105 | sdhA   | Metabolism and transport             | Amino acids, peptides, aminoglycans and amines                                  | L-serine dehydratase alpha subunit (EC 4.3.1.17)                                  | 0.486 | 0.002 | 1.320 | 0.004 | 3.159 | 0.001 |
| 1031113 | -         | gbs2106 |        | General function predicted only      |                                                                                 | Transglycosylase SLT domain family protein                                        | 1.178 | 0.041 | 1.331 | 0.000 | 0.588 | 0.010 |
| 1031059 | -         | gbs2107 |        | Cell Envelope                        | Biosynthesis and degradation of surface polysaccharides and lipopolysaccharides | peptidoglycan binding protein (LysM domain)                                       | 1.356 | 0.009 | 2.151 | 0.002 | 3.633 | 0.006 |
| 1030956 | COG0619P  | gbs2108 | cbiQ   | Metabolism and transport             | Inorganic ion transport and metabolism                                          | Hyaluronan ABC exporter permease protein                                          | 0.766 | 0.001 | 0.985 | 0.816 | 1.479 | 0.030 |
| 1030712 | COG1122P  | gbs2109 | cbiO2  | Metabolism and transport             | Inorganic ion transport and metabolism                                          | Hyaluronan ABC exporter ATP-binding protein                                       | 0.809 | 0.006 | 1.009 | 0.848 | 2.639 | 0.011 |
| 1030739 | COG1122P  | gbs2110 | cbiO1  | Metabolism and transport             | Inorganic ion transport and metabolism                                          | Hyaluronan ABC exporter ATP-binding protein                                       | 0.954 | 0.127 | 1.009 | 0.563 | 1.752 | 0.047 |
| 1030710 | COG0558I  | gbs2111 | pgsA   | Metabolism and transport             | Fatty acid and phospholipids                                                    | CDP-diacylglycerol-glycerol-3-phosphate 3-phosphatidyltransferase (EC 2.7.8.5)    | 1.115 | 0.011 | 1.047 | 0.563 | 1.598 | 0.046 |
| 1030721 | COG0612R  | gbs2112 |        | Cellular processes                   | Posttranslational modification, protein turnover, chaperones                    | Peptidase, M16 family                                                             | 1.172 | 0.045 | 1.051 | 0.282 | 2.876 | 0.008 |
| 1030765 | COG0612R  | gbs2113 |        | General function predicted only      |                                                                                 | Non-protolytic protein, peptidase family M16                                      | 1.624 | 0.000 | 1.113 | 0.139 | 2.037 | 0.040 |
| 1030822 | COG2501S  | gbs2114 |        | Hypothetical                         |                                                                                 | Hypothetical cytosolic protein                                                    | 1.469 | 0.003 | 1.705 | 0.000 | 2.563 | 0.009 |
| 1030733 | COG1195L  | gbs2115 | recF   | Cellular processes                   | DNA replication, recombination and repair                                       | DNA replication and repair protein recF                                           | 1.400 | 0.027 | 1.634 | 0.000 | 1.789 | 0.019 |
| 1031093 | COG4975G  | gbs2116 |        | Metabolism and transport             | Carbohydrates, organic alcohols, and acids                                      | Glucose uptake family protein                                                     | 0.960 | 0.442 | 1.133 | 0.002 | 3.653 | 0.002 |
| 1031097 | -         | gbs2117 |        | Cellular processes                   | Transcription                                                                   | Transcriptional regulator, Cro CI family                                          | 1.310 | 0.022 | 0.879 | 0.160 | 1.847 | 0.194 |
| 1030752 | COG0516F  | COG2118 | guaB   | Metabolism and transport             | Purines, pyrimidines, nucleosides, and nucleotides                              | Inosine-5-monophosphate dehydrogenase (EC 1.1.1.205)                              | 0.884 | 0.084 | 0.863 | 0.014 | 3.465 | 0.007 |
| 1030751 | COG1438K  | gbs2119 | ahrC.2 | Cellular processes                   | Transcription                                                                   | Arginine repressor, argR                                                          | 1.164 | 0.133 | 1.206 | 0.007 | 1.730 | 0.011 |
| 1031069 | COG0664T  | gbs2120 |        | Cellular processes                   | Transcription                                                                   | Transcriptional regulatory protein                                                | 1.355 | 0.001 | 1.189 | 0.118 | 1.421 | 0.049 |
| 1030823 | COG3382S  | gbs2121 |        | Hypothetical                         |                                                                                 | Hypothetical protein                                                              | 1.451 | 0.000 | 1.212 | 0.023 | 1.044 | 0.846 |
| 1031077 | COG2235E  | gbs2122 | arcA   | Metabolism and transport             | Amino acids, peptides, aminoglycans and amines                                  | Arginine deiminase (EC 3.5.3.6)                                                   | 1.777 | 0.007 | 0.672 | 0.009 | 2.014 | 0.000 |
| 1031073 | -         | gbs2123 |        | Metabolism and transport             | Central intermediary metabolism                                                 | Acetyltransferase (EC 2.3.1.-)                                                    | 1.983 | 0.000 | 0.751 | 0.093 | 1.937 | 0.015 |
| 1031070 | COG0078E  | gbs2124 | arcB   | Metabolism and transport             | Amino acids, peptides, aminoglycans and amines                                  | Ornithine carbamoyltransferase (EC 2.1.3.3)                                       | 2.210 | 0.035 | 0.722 | 0.048 | 2.142 | 0.007 |
| 1030825 | COG0531E  | gbs2125 |        | Metabolism and transport             | Amino acids, peptides, aminoglycans and amines                                  | Arginine ornithine antiporter                                                     | 1.369 | 0.196 | 0.571 | 0.002 | 2.792 | 0.000 |
| 1030767 | COG0549E  | gbs2126 | arcC   | Metabolism and transport             | Amino acids, peptides, aminoglycans and amines                                  | Carbamate kinase (EC 2.7.2.2)                                                     | 1.453 | 0.009 | 0.680 | 0.001 | 3.382 | 0.000 |
| 1030760 | COG0180J  | gbs2127 | trpS   | Cellular processes                   | Translation, ribosomal structure and biogenesis                                 | Tryptophanyl-tRNA synthetase (EC 6.1.1.2)                                         | 0.812 | 0.002 | 0.769 | 0.002 | 0.671 | 0.041 |
| 1030806 | -         | gbs2128 |        | Hypothetical                         |                                                                                 | Hypothetical membrane spanning protein                                            | 0.889 | 0.229 | 0.866 | 0.019 | 0.931 | 0.855 |
| 1030763 | COG1284S  | gbs2129 |        | Hypothetical                         |                                                                                 | Hypothetical membrane spanning protein                                            | 0.894 | 0.247 | 0.951 | 0.266 | 0.481 | 0.047 |
| 1031072 | COG0488R  | gbs2130 |        | Transport and binding proteins       | Unknown substrate                                                               | ABC transporter ATP-binding protein                                               | 1.093 | 0.032 | 1.246 | 0.005 | 1.199 | 0.033 |
| 1031067 | -         | gbs2131 |        | Transport and binding proteins       | Unknown substrate                                                               | ABC transporter, permease protein                                                 | 1.382 | 0.012 | 1.265 | 0.028 | 1.110 | 0.253 |
| 1031071 | COG1576S  | gbs2132 |        | Hypothetical                         |                                                                                 | Hypothetical cytosolic protein                                                    | 1.104 | 0.036 | 0.915 | 0.235 | 0.615 | 0.000 |
| 1030829 | COG0265O  | gbs2133 | htrA   | Cellular processes                   | Posttranslational modification, protein turnover, chaperones                    | Endopeptidase degP (EC 3.4.21.-)                                                  | 2.212 | 0.000 | 0.767 | 0.018 | 2.379 | 0.013 |
| 1031012 | COG1475K  | gbs2134 | parB   | Cellular processes                   | Transcription                                                                   | Chromosome partitioning protein parB                                              | 1.178 | 0.004 | 0.966 | 0.351 | 0.738 | 0.084 |
| 1031398 | -         | gbsp001 | rplA   | Cellular processes                   | Translation, ribosomal structure and biogenesis                                 | LSU ribosomal protein L1P                                                         | 0.815 | 0.005 | 1.122 | 0.046 | 1.274 | 0.215 |
| 1031801 | -         | gbsp002 | rplK   | Cellular processes                   | Translation, ribosomal structure and biogenesis                                 | LSU ribosomal protein L11P                                                        | 0.842 | 0.005 | 1.168 | 0.052 | 1.564 | 0.045 |
